# Supplementary material for: Transcriptomic Study on Ovine Immune Responses to Fasciola hepatica Infection
Source: PLoS Negl Trop Dis. 2016 Sep 23;10(9):e0005015. doi: 10.1371/journal.pntd.0005015 (PMC5035020; doi:10.1371/journal.pntd.0005015)
Supplement: S5 Table — (XLSX) [file pntd.0005015.s005.xlsx]

## Sheet: T2vsT1
Ensembl Gene ID	external_gene_name	description	Source	chromosome_name	logFC	AveExpr	t	P.Value	adj.P.Val	B
ENSOARG00000013509	CD274	CD274 molecule	Source:HGNC Symbol;Acc:HGNC:17635]	2	-9.69788	6.64432	19.2336	3.60005e-11	4.7913e-07	15.4059
ENSOARG00000004410		Uncharacterized protein	Source:UniProtKB/TrEMBL;Acc:W5P2R6]	13	10.3045	5.52714	-17.6964	1.05993e-10	5.23257e-07	14.3677
ENSOARG00000000230	SKI	SKI proto-oncogene	Source:HGNC Symbol;Acc:HGNC:10896]	12	8.14281	7.60367	-17.1637	1.57264e-10	5.23257e-07	14.2113
ENSOARG00000013445	36951	membrane-associated ring finger (C3HC4) 1, E3 ubiquitin protein ligase	Source:HGNC Symbol;Acc:HGNC:26077]	6	-7.72824	3.66458	17.5107	1.21469e-10	5.23257e-07	13.6467
ENSOARG00000010144	KLF3	Kruppel-like factor 3 (basic)	Source:HGNC Symbol;Acc:HGNC:16516]	6	8.8351	7.58776	-16.6739	2.28316e-10	6.07733e-07	13.8902
ENSOARG00000018840	SLC35E1	solute carrier family 35, member E1	Source:HGNC Symbol;Acc:HGNC:20803]	5	7.77781	5.43929	-15.9554	4.01887e-10	8.91452e-07	13.2958
ENSOARG00000003083		Uncharacterized protein	Source:UniProtKB/TrEMBL;Acc:W5NYN1]	25	5.48837	4.5387	-14.2196	1.74269e-09	1.04727e-06	11.9091
ENSOARG00000010365	NCOA6	nuclear receptor coactivator 6	Source:HGNC Symbol;Acc:HGNC:15936]	13	5.4287	7.39144	-14.4871	1.37618e-09	1.04727e-06	12.3037
ENSOARG00000007115	COIL	coilin	Source:HGNC Symbol;Acc:HGNC:2184]	11	5.19763	5.04244	-14.35	1.55245e-09	1.04727e-06	12.098
ENSOARG00000004526	NR1D2	nuclear receptor subfamily 1, group D, member 2	Source:HGNC Symbol;Acc:HGNC:7963]	26	5.19131	5.68066	-14.0276	2.06958e-09	1.04727e-06	11.904
ENSOARG00000017810	37500	septin 2	Source:HGNC Symbol;Acc:HGNC:7729]	1	4.61449	7.89433	-15.5584	5.54798e-10	1.04727e-06	13.1103
ENSOARG00000013354	EPC1	enhancer of polycomb homolog 1 (Drosophila)	Source:HGNC Symbol;Acc:HGNC:19876]	13	4.06914	6.01389	-14.2111	1.75601e-09	1.04727e-06	12.076
ENSOARG00000004568	MRPL18	mitochondrial ribosomal protein L18	Source:HGNC Symbol;Acc:HGNC:14477]	8	-4.6471	4.19477	14.1777	1.80899e-09	1.04727e-06	11.8074
ENSOARG00000013544	RIC1	RAB6A GEF complex partner 1	Source:HGNC Symbol;Acc:HGNC:17686]	2	-5.36128	5.21199	15.1821	7.58349e-10	1.04727e-06	12.7491
ENSOARG00000021172	RDH11	retinol dehydrogenase 11 (all-trans/9-cis/11-cis)	Source:HGNC Symbol;Acc:HGNC:17964]	7	-5.45329	4.50476	14.006	2.11032e-09	1.04727e-06	11.7376
ENSOARG00000001589		Uncharacterized protein	Source:UniProtKB/TrEMBL;Acc:W5NU18]	4	-6.03277	6.33632	14.1028	1.93441e-09	1.04727e-06	11.989
ENSOARG00000007835		Uncharacterized protein	Source:UniProtKB/TrEMBL;Acc:W5PD98]	13	-6.07297	5.48938	13.9985	2.12459e-09	1.04727e-06	11.8584
ENSOARG00000019488	ATP6V1A	ATPase, H+ transporting, lysosomal 70kDa, V1 subunit A	Source:HGNC Symbol;Acc:HGNC:851]	1	-6.84559	5.0041	14.6932	1.15019e-09	1.04727e-06	12.3372
ENSOARG00000001645		Uncharacterized protein	Source:UniProtKB/TrEMBL;Acc:W5NU82]	4	-7.52092	5.5214	14.0902	1.95632e-09	1.04727e-06	11.9215
ENSOARG00000010043	CWF19L2	CWF19-like 2, cell cycle control (S. pombe)	Source:HGNC Symbol;Acc:HGNC:26508]	15	-7.62418	5.15618	14.6468	1.19741e-09	1.04727e-06	12.3138
ENSOARG00000019260	GCSAM	germinal center-associated, signaling and motility	Source:HGNC Symbol;Acc:HGNC:20253]	1	-9.46625	1.85827	14.6075	1.23888e-09	1.04727e-06	10.4937
ENSOARG00000018086		Uncharacterized protein	Source:UniProtKB/TrEMBL;Acc:W5Q9M7]	X	-9.84203	2.29466	14.2639	1.67536e-09	1.04727e-06	10.7169
ENSOARG00000007348	P4HA1	prolyl 4-hydroxylase, alpha polypeptide I	Source:HGNC Symbol;Acc:HGNC:8546]	25	-10.9297	3.89157	14.3649	1.5322e-09	1.04727e-06	11.6951
ENSOARG00000006681	EGLN3	egl-9 family hypoxia-inducible factor 3	Source:HGNC Symbol;Acc:HGNC:14661]	18	-16.5806	3.42495	14.2045	1.76635e-09	1.04727e-06	11.021
ENSOARG00000017253	ANKRD33	ankyrin repeat domain 33	Source:HGNC Symbol;Acc:HGNC:13788]	3	-19.3557	-0.734562	14.4647	1.40338e-09	1.04727e-06	6.00426
ENSOARG00000008817	HSP70	Ovis aries heat shock 70kDa protein 1A (HSPA1A), mRNA.	Source:RefSeq mRNA;Acc:NM_001267874]	20	-25.2916	7.32537	14.5053	1.35441e-09	1.04727e-06	12.1858
ENSOARG00000008800	HSP70	Uncharacterized protein	Source:UniProtKB/TrEMBL;Acc:W5PG95]	20	-25.7486	7.38829	14.7807	1.06664e-09	1.04727e-06	12.3941
ENSOARG00000014175	SLC9A7	solute carrier family 9, subfamily A (NHE7, cation proton antiporter 7), member 7	Source:HGNC Symbol;Acc:HGNC:17123]	X	-6.05707	3.13366	13.9479	2.22404e-09	1.05713e-06	11.2234
ENSOARG00000006386	PHYKPL	5-phosphohydroxy-L-lysine phospho-lyase	Source:HGNC Symbol;Acc:HGNC:28249]	5	7.68405	4.13414	-13.6273	2.98219e-09	1.34808e-06	11.3153
ENSOARG00000002365	USP22	ubiquitin specific peptidase 22	Source:HGNC Symbol;Acc:HGNC:12621]	11	4.6512	7.16271	-13.5374	3.24132e-09	1.34808e-06	11.5237
ENSOARG00000004435				3	4.51455	6.76026	-13.5676	3.15151e-09	1.34808e-06	11.5518
ENSOARG00000021063	CD69	Uncharacterized protein	Source:UniProtKB/TrEMBL;Acc:W5QIT4]	3	-7.50326	5.85616	13.5424	3.22617e-09	1.34808e-06	11.4919
ENSOARG00000018803	PGK1	Ovis aries phosphoglycerate kinase 1 (PGK1), mRNA.	Source:RefSeq mRNA;Acc:NM_001142516]	X	-5.01643	8.15116	13.4552	3.4992e-09	1.41124e-06	11.4449
ENSOARG00000014904	PAPD7	PAP associated domain containing 7	Source:HGNC Symbol;Acc:HGNC:16705]	16	4.05622	6.20528	-13.3622	3.81791e-09	1.45179e-06	11.37
ENSOARG00000008408	MAN1A1	mannosidase, alpha, class 1A, member 1	Source:HGNC Symbol;Acc:HGNC:6821]	8	-5.95882	4.76839	13.3667	3.80183e-09	1.45179e-06	11.2585
ENSOARG00000013600	KIAA2026	KIAA2026	Source:HGNC Symbol;Acc:HGNC:23378]	2	3.69717	5.40341	-13.3194	3.97481e-09	1.46946e-06	11.3001
ENSOARG00000007443	IRF2	Ovis aries interferon regulatory factor 2 (IRF2), mRNA.	Source:RefSeq mRNA;Acc:NM_001009740]	26	-5.86169	5.42475	13.2688	4.16925e-09	1.49969e-06	11.2451
ENSOARG00000019709	TIA1	TIA1 cytotoxic granule-associated RNA binding protein	Source:HGNC Symbol;Acc:HGNC:11802]	3	-4.07975	4.93857	13.2394	4.28727e-09	1.50156e-06	11.1871
ENSOARG00000019722	PPFIBP1	PTPRF interacting protein, binding protein 1 (liprin beta 1)	Source:HGNC Symbol;Acc:HGNC:9249]	3	-8.9626	4.80682	13.1969	4.46348e-09	1.52319e-06	11.0817
ENSOARG00000014629	CUX1	cut-like homeobox 1	Source:HGNC Symbol;Acc:HGNC:2557]	24	-3.6752	5.66022	13.0557	5.10787e-09	1.69952e-06	11.085
ENSOARG00000016134	KCNK7	potassium channel, two pore domain subfamily K, member 7	Source:HGNC Symbol;Acc:HGNC:6282]	21	8.36751	1.75009	-12.8226	6.39826e-09	1.76623e-06	9.43861
ENSOARG00000008821	SLC25A34	solute carrier family 25, member 34	Source:HGNC Symbol;Acc:HGNC:27653]	12	6.87677	2.85943	-12.8252	6.3825e-09	1.76623e-06	10.2362
ENSOARG00000006853				1	5.43683	4.33056	-12.806	6.50277e-09	1.76623e-06	10.7147
ENSOARG00000003611	ZNF304	zinc finger protein 304	Source:HGNC Symbol;Acc:HGNC:13505]	14	4.88134	4.72207	-12.9034	5.91542e-09	1.76623e-06	10.8656
ENSOARG00000012321	MAP3K7	mitogen-activated protein kinase kinase kinase 7	Source:HGNC Symbol;Acc:HGNC:6859]	8	-4.07522	4.63833	12.8092	6.48235e-09	1.76623e-06	10.7772
ENSOARG00000012714	DDX10	DEAD (Asp-Glu-Ala-Asp) box polypeptide 10	Source:HGNC Symbol;Acc:HGNC:2735]	15	-4.86363	4.9291	12.9765	5.51179e-09	1.76623e-06	10.9536
ENSOARG00000006829	CENPC	centromere protein C	Source:HGNC Symbol;Acc:HGNC:1854]	6	-4.88241	4.22228	12.9106	5.8742e-09	1.76623e-06	10.7905
ENSOARG00000021144	PPP2R5E	protein phosphatase 2, regulatory subunit B', epsilon isoform	Source:HGNC Symbol;Acc:HGNC:9313]	7	-5.82994	4.32976	12.8461	6.25363e-09	1.76623e-06	10.7455
ENSOARG00000016003	IRG1	immunoresponsive 1 homolog (mouse)	Source:HGNC Symbol;Acc:HGNC:33904]	10	-8.67977	5.21473	12.9395	5.71234e-09	1.76623e-06	10.9035
ENSOARG00000012129	SLC7A5	solute carrier family 7 (amino acid transporter light chain, L system), member 5	Source:HGNC Symbol;Acc:HGNC:11063]	14	4.02951	5.34979	-12.7649	6.76931e-09	1.78325e-06	10.8049
ENSOARG00000007284	ARHGAP10	Rho GTPase activating protein 10	Source:HGNC Symbol;Acc:HGNC:26099]	17	-10.2237	3.95347	12.7552	6.83342e-09	1.78325e-06	10.4868
ENSOARG00000017993	TRMT6	tRNA methyltransferase 6	Source:HGNC Symbol;Acc:HGNC:20900]	13	4.60412	5.59966	-12.7265	7.02882e-09	1.79897e-06	10.782
ENSOARG00000008282	NCOA5	nuclear receptor coactivator 5	Source:HGNC Symbol;Acc:HGNC:15909]	13	3.59105	6.40687	-12.6954	7.24608e-09	1.81959e-06	10.7773
ENSOARG00000020953	VPS72	vacuolar protein sorting 72 homolog (S. cerevisiae)	Source:HGNC Symbol;Acc:HGNC:11644]	1	-4.04749	6.50788	12.6058	7.9155e-09	1.95088e-06	10.6952
ENSOARG00000009823	ORC4	origin recognition complex, subunit 4	Source:HGNC Symbol;Acc:HGNC:8490]	2	-4.31408	4.65459	12.5864	8.06881e-09	1.95251e-06	10.5797
ENSOARG00000017577	ING5	inhibitor of growth family, member 5	Source:HGNC Symbol;Acc:HGNC:19421]	1	6.6539	4.05882	-12.5411	8.43908e-09	1.95825e-06	10.417
ENSOARG00000016500				5	4.13407	5.93783	-12.4958	8.82822e-09	1.95825e-06	10.5845
ENSOARG00000020174	XPO1	exportin 1	Source:HGNC Symbol;Acc:HGNC:12825]	3	-3.84644	7.26829	12.5438	8.41701e-09	1.95825e-06	10.636
ENSOARG00000018931	RSPRY1	ring finger and SPRY domain containing 1	Source:HGNC Symbol;Acc:HGNC:29420]	14	-4.03036	4.71136	12.5121	8.68615e-09	1.95825e-06	10.5218
ENSOARG00000006697	CEP170	centrosomal protein 170kDa	Source:HGNC Symbol;Acc:HGNC:28920]	12	-4.81071	5.80831	12.5119	8.68788e-09	1.95825e-06	10.5911
ENSOARG00000020851		Uncharacterized protein	Source:UniProtKB/TrEMBL;Acc:W5QI59]	7	-6.92215	5.09097	12.4656	9.09813e-09	1.97031e-06	10.4965
ENSOARG00000016247	CETN3	centrin, EF-hand protein, 3	Source:HGNC Symbol;Acc:HGNC:1868]	5	-7.37419	4.7286	12.4568	9.17868e-09	1.97031e-06	10.4434
ENSOARG00000020842		Uncharacterized protein	Source:UniProtKB/TrEMBL;Acc:W5QI49]	1	-9.8482	2.49478	12.3862	9.85058e-09	2.08097e-06	9.59281
ENSOARG00000018238	TEF	thyrotroph embryonic factor	Source:RefSeq peptide;Acc:NP_001132923]	3	4.83522	4.53429	-12.3364	1.03556e-08	2.15348e-06	10.3322
ENSOARG00000012807	ADIPOR2	adiponectin receptor 2	Source:HGNC Symbol;Acc:HGNC:24041]	3	4.01048	5.31348	-12.2541	1.12535e-08	2.23542e-06	10.3313
ENSOARG00000011388	ZNF638	zinc finger protein 638	Source:HGNC Symbol;Acc:HGNC:17894]	3	-4.19532	7.66432	12.2576	1.12131e-08	2.23542e-06	10.3638
ENSOARG00000018817	RBM41	RNA binding motif protein 41	Source:HGNC Symbol;Acc:HGNC:25617]	X	-5.93806	2.29465	12.2728	1.1042e-08	2.23542e-06	9.5505
ENSOARG00000012864	C11orf30	chromosome 11 open reading frame 30	Source:HGNC Symbol;Acc:HGNC:18071]	15	-6.75273	4.30176	12.2163	1.16928e-08	2.28852e-06	10.1725
ENSOARG00000018101	SRA1	steroid receptor RNA activator 1	Source:HGNC Symbol;Acc:HGNC:11281]	5	-4.57124	4.72818	12.1947	1.19528e-08	2.28942e-06	10.2287
ENSOARG00000020116	BMF	Bcl2 modifying factor	Source:HGNC Symbol;Acc:HGNC:24132]	7	-4.99877	5.23955	12.1874	1.20414e-08	2.28942e-06	10.2588
ENSOARG00000000630	IQSEC1	IQ motif and Sec7 domain 1	Source:HGNC Symbol;Acc:HGNC:29112]	JH924682.1	6.11956	6.11984	-12.1705	1.22503e-08	2.29632e-06	10.2743
ENSOARG00000001288		Uncharacterized protein	Source:UniProtKB/TrEMBL;Acc:W5NT44]	4	-6.79301	3.49682	12.1503	1.25048e-08	2.31147e-06	9.92275
ENSOARG00000000538	TLR1	Ovis aries toll-like receptor 1 (TLR1), mRNA.	Source:RefSeq mRNA;Acc:NM_001135060]	6	-7.66898	3.88307	12.1311	1.27531e-08	2.32509e-06	9.99395
ENSOARG00000010824	SPCS2	signal peptidase complex subunit 2 homolog (S. cerevisiae)	Source:HGNC Symbol;Acc:HGNC:28962]	15	-4.47759	6.54899	12.1057	1.30884e-08	2.33786e-06	10.2213
ENSOARG00000014901	MYB	v-myb avian myeloblastosis viral oncogene homolog	Source:HGNC Symbol;Acc:HGNC:7545]	8	-7.26511	2.55286	12.0993	1.31745e-08	2.33786e-06	9.50192
ENSOARG00000002887	SLC45A4	solute carrier family 45, member 4	Source:HGNC Symbol;Acc:HGNC:29196]	9	5.83468	3.85077	-12.0469	1.39019e-08	2.43447e-06	9.94454
ENSOARG00000006549	TMEM101	transmembrane protein 101	Source:HGNC Symbol;Acc:HGNC:28653]	11	-6.51279	2.393	12.0269	1.41901e-08	2.45267e-06	9.38783
ENSOARG00000015825		Uncharacterized protein	Source:UniProtKB/TrEMBL;Acc:W5Q2Q4]	11	4.51612	5.36151	-12.0066	1.44891e-08	2.47225e-06	10.0975
ENSOARG00000012028	SLC7A1	solute carrier family 7 (cationic amino acid transporter, y+ system), member 1	Source:HGNC Symbol;Acc:HGNC:11057]	10	6.05403	5.26154	-11.9811	1.48757e-08	2.50609e-06	10.0582
ENSOARG00000011238	KIAA0232	KIAA0232	Source:HGNC Symbol;Acc:HGNC:28992]	6	4.15188	5.51914	-11.9603	1.51985e-08	2.52846e-06	10.061
ENSOARG00000004992	LFNG	LFNG O-fucosylpeptide 3-beta-N-acetylglucosaminyltransferase	Source:HGNC Symbol;Acc:HGNC:6560]	24	7.79658	5.40205	-11.8009	1.79369e-08	2.59481e-06	9.88263
ENSOARG00000011559	GRPEL1	GrpE-like 1, mitochondrial (E. coli)	Source:HGNC Symbol;Acc:HGNC:19696]	6	3.69661	6.57494	-11.9138	1.59486e-08	2.59481e-06	10.0351
ENSOARG00000013264	DBF4	DBF4 zinc finger	Source:HGNC Symbol;Acc:HGNC:17364]	4	3.61079	5.52372	-11.8332	1.73426e-08	2.59481e-06	9.93841
ENSOARG00000019852	ASUN	asunder spermatogenesis regulator	Source:HGNC Symbol;Acc:HGNC:20174]	3	-3.84906	5.30663	11.8128	1.77165e-08	2.59481e-06	9.90787
ENSOARG00000020758	VPS45	vacuolar protein sorting 45 homolog (S. cerevisiae)	Source:HGNC Symbol;Acc:HGNC:14579]	1	-5.35394	2.88107	11.8275	1.74466e-08	2.59481e-06	9.47391
ENSOARG00000015503	KIF20B	kinesin family member 20B	Source:HGNC Symbol;Acc:HGNC:7212]	22	-5.35545	4.00395	11.828	1.74365e-08	2.59481e-06	9.77531
ENSOARG00000020061	UGP2	UDP-glucose pyrophosphorylase 2	Source:HGNC Symbol;Acc:HGNC:12527]	3	-5.81349	5.66722	11.8364	1.72845e-08	2.59481e-06	9.93909
ENSOARG00000005209	SDC4	syndecan 4	Source:HGNC Symbol;Acc:HGNC:10661]	13	-6.37987	2.55442	11.8061	1.78394e-08	2.59481e-06	9.28393
ENSOARG00000018770	CXorf21	chromosome X open reading frame 21	Source:HGNC Symbol;Acc:HGNC:25667]	X	-7.12077	2.6981	11.8157	1.76628e-08	2.59481e-06	9.34908
ENSOARG00000013162	LGMN	legumain	Source:HGNC Symbol;Acc:HGNC:9472]	18	-8.88935	6.71114	11.8194	1.7594e-08	2.59481e-06	9.93452
ENSOARG00000021049		Uncharacterized protein	Source:UniProtKB/TrEMBL;Acc:W5QIS1]	3	-9.75926	1.69438	11.8065	1.78336e-08	2.59481e-06	8.5916
ENSOARG00000012176	MRC1	Ovis aries mannose receptor, C type 1 (MRC1), mRNA.	Source:RefSeq mRNA;Acc:NM_001197180]	13	-9.93657	4.15934	11.8437	1.71537e-08	2.59481e-06	9.75743
ENSOARG00000001782		Uncharacterized protein	Source:UniProtKB/TrEMBL;Acc:W5NUM5]	JH922700.1	8.44767	3.58473	-11.7742	1.84465e-08	2.59595e-06	9.5891
ENSOARG00000002658	C15orf39	chromosome 15 open reading frame 39	Source:HGNC Symbol;Acc:HGNC:24497]	18	6.87447	5.02318	-11.7516	1.88881e-08	2.59595e-06	9.81668
ENSOARG00000014630	MKNK2	MAP kinase interacting serine/threonine kinase 2	Source:HGNC Symbol;Acc:HGNC:7111]	5	5.02555	7.67862	-11.7778	1.83771e-08	2.59595e-06	9.89674
ENSOARG00000010236	TMEM64	transmembrane protein 64	Source:HGNC Symbol;Acc:HGNC:25441]	9	4.63829	3.54082	-11.75	1.892e-08	2.59595e-06	9.61491
ENSOARG00000020511	CAPG	capping protein (actin filament), gelsolin-like	Source:HGNC Symbol;Acc:HGNC:1474]	3	-6.77355	6.66207	11.7571	1.87789e-08	2.59595e-06	9.87646
ENSOARG00000010360	XYLT1	xylosyltransferase I	Source:HGNC Symbol;Acc:HGNC:15516]	24	-5.56166	5.0018	11.7115	1.97014e-08	2.64027e-06	9.78149
ENSOARG00000005460	DDB2	damage-specific DNA binding protein 2, 48kDa	Source:HGNC Symbol;Acc:HGNC:2718]	15	-5.61782	4.94802	11.6931	2.00853e-08	2.64027e-06	9.76112
ENSOARG00000015950	NKAP	NFKB activating protein	Source:HGNC Symbol;Acc:HGNC:29873]	X	-7.32163	2.64675	11.703	1.98773e-08	2.64027e-06	9.22556
ENSOARG00000003526	RPP25L	ribonuclease P/MRP 25kDa subunit-like	Source:HGNC Symbol;Acc:HGNC:19909]	2	-7.70922	2.15472	11.6861	2.0235e-08	2.64027e-06	8.94673
ENSOARG00000017585	ERO1L	ERO1-like (S. cerevisiae)	Source:HGNC Symbol;Acc:HGNC:13280]	7	-9.18501	5.90517	11.6979	1.99833e-08	2.64027e-06	9.79523
ENSOARG00000008654	PEX19	peroxisomal biogenesis factor 19	Source:HGNC Symbol;Acc:HGNC:9713]	1	-4.29694	4.36377	11.5461	2.34692e-08	3.03254e-06	9.57006
ENSOARG00000013732	ARHGAP18	Rho GTPase activating protein 18	Source:HGNC Symbol;Acc:HGNC:21035]	8	-6.48794	3.56649	11.5352	2.37428e-08	3.03839e-06	9.39391
ENSOARG00000016409	KLF13	Kruppel-like factor 13	Source:HGNC Symbol;Acc:HGNC:13672]	18	6.993	4.187	-11.5002	2.46444e-08	3.06739e-06	9.47684
ENSOARG00000001590	RAI1	retinoic acid induced 1	Source:HGNC Symbol;Acc:HGNC:9834]	11	4.32704	5.44789	-11.4739	2.53487e-08	3.06739e-06	9.57459
ENSOARG00000018876	CHERP	calcium homeostasis endoplasmic reticulum protein	Source:HGNC Symbol;Acc:HGNC:16930]	5	4.01325	6.85034	-11.4864	2.50121e-08	3.06739e-06	9.60654
ENSOARG00000017590	CDK13	cyclin-dependent kinase 13	Source:HGNC Symbol;Acc:HGNC:1733]	4	3.20148	6.19733	-11.4737	2.53523e-08	3.06739e-06	9.59229
ENSOARG00000016832	ATP6V1C1	ATPase, H+ transporting, lysosomal 42kDa, V1 subunit C1	Source:HGNC Symbol;Acc:HGNC:856]	9	-5.54508	4.63057	11.4991	2.46735e-08	3.06739e-06	9.5449
ENSOARG00000001630	SLC39A1	Ovis aries solute carrier family 39 (zinc transporter), member 1 (SLC39A1), mRNA.	Source:RefSeq mRNA;Acc:NM_001163600]	1	-7.12247	2.87012	11.5066	2.44777e-08	3.06739e-06	9.14707
ENSOARG00000009140	LRRC8A	leucine rich repeat containing 8 family, member A	Source:HGNC Symbol;Acc:HGNC:19027]	3	4.29301	5.95959	-11.4572	2.58049e-08	3.09403e-06	9.57106
ENSOARG00000015263	CTSB	Cathepsin B	Source:UniProtKB/TrEMBL;Acc:W5Q0Z2]	2	-6.40028	6.78521	11.4384	2.63297e-08	3.12876e-06	9.55565
ENSOARG00000019129	TRIB3	tribbles pseudokinase 3	Source:HGNC Symbol;Acc:HGNC:16228]	13	6.55791	4.09895	-11.3662	2.84552e-08	3.13986e-06	9.33519
ENSOARG00000016053				1	5.43881	7.15874	-11.3633	2.85463e-08	3.13986e-06	9.47898
ENSOARG00000009373		Uncharacterized protein	Source:UniProtKB/TrEMBL;Acc:W5PHY8]	18	4.57958	6.63007	-11.4103	2.71378e-08	3.13986e-06	9.52763
ENSOARG00000015561	SSSCA1	Sjogren syndrome/scleroderma autoantigen 1	Source:HGNC Symbol;Acc:HGNC:11328]	21	4.3886	5.78815	-11.3725	2.82633e-08	3.13986e-06	9.48114
ENSOARG00000016608	ANAPC7	anaphase promoting complex subunit 7	Source:HGNC Symbol;Acc:HGNC:17380]	17	-3.52436	5.08734	11.3778	2.81038e-08	3.13986e-06	9.46456
ENSOARG00000009818	NCOA3	nuclear receptor coactivator 3	Source:HGNC Symbol;Acc:HGNC:7670]	13	-3.58133	7.13338	11.3984	2.74856e-08	3.13986e-06	9.51582
ENSOARG00000021022	SNX27	sorting nexin family member 27	Source:HGNC Symbol;Acc:HGNC:20073]	1	-6.29221	4.65332	11.3824	2.79626e-08	3.13986e-06	9.42574
ENSOARG00000005817	CHST2	carbohydrate (N-acetylglucosamine-6-O) sulfotransferase 2	Source:HGNC Symbol;Acc:HGNC:1970]	1	-6.944	2.84825	11.3998	2.74464e-08	3.13986e-06	9.05231
ENSOARG00000002144	LDLRAD4	low density lipoprotein receptor class A domain containing 4	Source:HGNC Symbol;Acc:HGNC:1224]	23	-5.65642	5.20345	11.3328	2.95023e-08	3.21841e-06	9.41701
ENSOARG00000000378	TCEAL8	transcription elongation factor A (SII)-like 8	Source:HGNC Symbol;Acc:HGNC:28683]	X	-4.1422	4.31354	11.3238	2.97906e-08	3.22344e-06	9.34592
ENSOARG00000020535	SNAP23	synaptosomal-associated protein, 23kDa	Source:HGNC Symbol;Acc:HGNC:11131]	7	-6.53803	4.05464	11.3117	3.01819e-08	3.23944e-06	9.28054
ENSOARG00000011705	C14orf119	chromosome 14 open reading frame 119	Source:HGNC Symbol;Acc:HGNC:20270]	7	-5.06946	3.57991	11.2505	3.22538e-08	3.43413e-06	9.15159
ENSOARG00000000991	AKAP5	A kinase (PRKA) anchor protein 5	Source:HGNC Symbol;Acc:HGNC:375]	7	-5.35746	4.03694	11.2223	3.32594e-08	3.51309e-06	9.20009
ENSOARG00000003531	THAP5	THAP domain containing 5	Source:HGNC Symbol;Acc:HGNC:23188]	4	-4.67263	4.2516	11.1577	3.56929e-08	3.74045e-06	9.16942
ENSOARG00000021137	SNAPC1	small nuclear RNA activating complex, polypeptide 1, 43kDa	Source:HGNC Symbol;Acc:HGNC:11134]	7	-5.14307	5.26964	11.137	3.65121e-08	3.7964e-06	9.22078
ENSOARG00000018302	SFN	Ovis aries stratifin (SFN), mRNA.	Source:RefSeq mRNA;Acc:NM_001009208]	2	9.59634	1.09767	-11.1275	3.68911e-08	3.80608e-06	7.60495
ENSOARG00000008407	BAZ2A	bromodomain adjacent to zinc finger domain, 2A	Source:HGNC Symbol;Acc:HGNC:962]	3	-3.30978	7.02881	11.1058	3.7784e-08	3.86821e-06	9.21125
ENSOARG00000007460	DNAJB7	DnaJ (Hsp40) homolog, subfamily B, member 7	Source:HGNC Symbol;Acc:HGNC:24986]	4	5.13112	7.68889	-11.098	3.81071e-08	3.87151e-06	9.20094
ENSOARG00000010657		Uncharacterized protein	Source:UniProtKB/TrEMBL;Acc:W5PLV7]	2	-4.21194	6.40417	11.0717	3.92294e-08	3.87939e-06	9.1748
ENSOARG00000021131	MNAT1	MNAT CDK-activating kinase assembly factor 1	Source:HGNC Symbol;Acc:HGNC:7181]	7	-4.94486	3.91381	11.0689	3.93506e-08	3.87939e-06	9.03304
ENSOARG00000002626	ZC3H12D	zinc finger CCCH-type containing 12D	Source:HGNC Symbol;Acc:HGNC:21175]	8	-8.3381	2.41023	11.0761	3.90375e-08	3.87939e-06	8.54515
ENSOARG00000007707	NRCAM	neuronal cell adhesion molecule	Source:HGNC Symbol;Acc:HGNC:7994]	4	-16.3088	-2.25803	11.0836	3.8716e-08	3.87939e-06	4.2696
ENSOARG00000009938	KYNU	kynureninase	Source:HGNC Symbol;Acc:HGNC:6469]	2	-5.50766	3.61979	11.0514	4.01156e-08	3.92572e-06	8.95845
ENSOARG00000002073	SHPRH	SNF2 histone linker PHD RING helicase, E3 ubiquitin protein ligase	Source:HGNC Symbol;Acc:HGNC:19336]	8	-4.55739	4.62394	11.0372	4.07508e-08	3.95878e-06	9.08162
ENSOARG00000019221	ABHD10	abhydrolase domain containing 10	Source:HGNC Symbol;Acc:HGNC:25656]	1	-4.84982	3.67377	11.0268	4.12193e-08	3.97527e-06	8.95248
ENSOARG00000009516	RTN4RL2	reticulon 4 receptor-like 2	Source:HGNC Symbol;Acc:HGNC:23053]	15	5.99273	3.90666	-11.0154	4.17437e-08	3.99688e-06	8.9688
ENSOARG00000020746		Uncharacterized protein	Source:UniProtKB/TrEMBL;Acc:W5QHU6]	7	-5.00303	3.52782	10.9949	4.27e-08	4.05925e-06	8.89057
ENSOARG00000018884				3	4.0689	9.80913	-10.981	4.33638e-08	4.09311e-06	9.07169
ENSOARG00000009139	FYCO1	FYVE and coiled-coil domain containing 1	Source:HGNC Symbol;Acc:HGNC:14673]	19	-5.21585	3.58296	10.9672	4.40361e-08	4.12729e-06	8.87302
ENSOARG00000013102	ETS1	v-ets avian erythroblastosis virus E26 oncogene homolog 1	Source:HGNC Symbol;Acc:HGNC:3488]	21	-4.78156	10.2635	10.9533	4.47197e-08	4.13615e-06	9.04136
ENSOARG00000019196	LANCL1	LanC lantibiotic synthetase component C-like 1 (bacterial)	Source:HGNC Symbol;Acc:HGNC:6508]	2	-6.80995	3.87385	10.9526	4.47521e-08	4.13615e-06	8.89249
ENSOARG00000013968	RP2	retinitis pigmentosa 2 (X-linked recessive)	Source:HGNC Symbol;Acc:HGNC:10274]	X	-5.24981	3.36716	10.9422	4.52759e-08	4.1557e-06	8.80362
ENSOARG00000020230	C15orf57	chromosome 15 open reading frame 57	Source:HGNC Symbol;Acc:HGNC:28295]	7	-6.37478	2.77689	10.9216	4.63259e-08	4.16589e-06	8.60153
ENSOARG00000020971	DMXL2	Dmx-like 2	Source:HGNC Symbol;Acc:HGNC:2938]	7	-11.1098	3.35743	10.9263	4.6081e-08	4.16589e-06	8.6707
ENSOARG00000016744	NOS2	nitric oxide synthase 2, inducible	Source:HGNC Symbol;Acc:HGNC:7873]	11	-27.401	-1.06981	10.9216	4.63245e-08	4.16589e-06	4.5001
ENSOARG00000005636	GSPT2	G1 to S phase transition 2	Source:HGNC Symbol;Acc:HGNC:4622]	X	-5.02033	3.43748	10.8919	4.78839e-08	4.27709e-06	8.7676
ENSOARG00000009946	HEATR5B	HEAT repeat containing 5B	Source:HGNC Symbol;Acc:HGNC:29273]	3	-7.3377	3.27665	10.8651	4.93432e-08	4.37805e-06	8.67706
ENSOARG00000019337	KIAA0930	KIAA0930	Source:HGNC Symbol;Acc:HGNC:1314]	3	5.39273	6.04922	-10.8531	5.0007e-08	4.37858e-06	8.93728
ENSOARG00000004073	PSD3	pleckstrin and Sec7 domain containing 3	Source:HGNC Symbol;Acc:HGNC:19093]	26	-9.13509	1.90645	10.858	4.97366e-08	4.37858e-06	8.03408
ENSOARG00000018783	RPP40	ribonuclease P/MRP 40kDa subunit	Source:HGNC Symbol;Acc:HGNC:20992]	20	6.57243	3.4711	-10.8112	5.24119e-08	4.50514e-06	8.6806
ENSOARG00000016216	SDAD1	SDA1 domain containing 1	Source:HGNC Symbol;Acc:HGNC:25537]	6	4.01926	6.83167	-10.8142	5.22369e-08	4.50514e-06	8.89962
ENSOARG00000014035	ELF2	E74-like factor 2 (ets domain transcription factor)	Source:HGNC Symbol;Acc:HGNC:3317]	17	3.16895	5.83679	-10.8103	5.2468e-08	4.50514e-06	8.89183
ENSOARG00000003833	AP1G1	adaptor-related protein complex 1, gamma 1 subunit	Source:HGNC Symbol;Acc:HGNC:555]	14	3.02465	7.12406	-10.8031	5.28915e-08	4.51239e-06	8.88733
ENSOARG00000005451		Uncharacterized protein	Source:UniProtKB/TrEMBL;Acc:W5P5Z4]	24	-5.3696	3.75621	10.7757	5.45477e-08	4.62405e-06	8.70779
ENSOARG00000017354	NXF1	nuclear RNA export factor 1	Source:HGNC Symbol;Acc:HGNC:8071]	21	4.09838	6.98062	-10.7449	5.64766e-08	4.75726e-06	8.82421
ENSOARG00000000501	RNF5	ring finger protein 5, E3 ubiquitin protein ligase	Source:HGNC Symbol;Acc:HGNC:10068]	20	-3.93361	4.79269	10.7037	5.9169e-08	4.92175e-06	8.74475
ENSOARG00000008967	SLAMF7	SLAM family member 7	Source:HGNC Symbol;Acc:HGNC:21394]	1	-7.76756	4.60095	10.7089	5.88209e-08	4.92175e-06	8.71681
ENSOARG00000002665				3	6.8599	7.51018	-10.6755	6.10944e-08	5.02007e-06	8.74711
ENSOARG00000012305	NANP	N-acetylneuraminic acid phosphatase	Source:HGNC Symbol;Acc:HGNC:16140]	13	4.72102	3.6822	-10.6753	6.11053e-08	5.02007e-06	8.60071
ENSOARG00000003552		Uncharacterized protein	Source:UniProtKB/TrEMBL;Acc:W5P042]	14	4.40155	4.3373	-10.6577	6.23366e-08	5.02811e-06	8.66334
ENSOARG00000012367	ITGB2	integrin, beta 2 (complement component 3 receptor 3 and 4 subunit)	Source:HGNC Symbol;Acc:HGNC:6155]	1	3.65244	6.61387	-10.6637	6.19197e-08	5.02811e-06	8.73554
ENSOARG00000008100	FUT11	fucosyltransferase 11 (alpha (1,3) fucosyltransferase)	Source:HGNC Symbol;Acc:HGNC:19233]	25	-8.02007	1.77563	10.6609	6.2112e-08	5.02811e-06	7.84557
ENSOARG00000007436	STX18	syntaxin 18	Source:HGNC Symbol;Acc:HGNC:15942]	6	-6.9056	2.58032	10.6524	6.27189e-08	5.02847e-06	8.26913
ENSOARG00000020062	GOLGB1	golgin B1	Source:HGNC Symbol;Acc:HGNC:4429]	1	-4.0275	5.88534	10.6345	6.40079e-08	5.10109e-06	8.69986
ENSOARG00000018758	PBDC1	polysaccharide biosynthesis domain containing 1	Source:HGNC Symbol;Acc:HGNC:28790]	X	-5.31367	3.35047	10.6274	6.4528e-08	5.11193e-06	8.48236
ENSOARG00000010303	TP53INP2	tumor protein p53 inducible nuclear protein 2	Source:HGNC Symbol;Acc:HGNC:16104]	13	8.23839	1.73767	-10.6137	6.55446e-08	5.14083e-06	7.76967
ENSOARG00000018890	CCNYL1	cyclin Y-like 1	Source:HGNC Symbol;Acc:HGNC:26868]	2	4.44677	3.1514	-10.612	6.56654e-08	5.14083e-06	8.43515
ENSOARG00000014289	MLLT3	myeloid/lymphoid or mixed-lineage leukemia (trithorax homolog, Drosophila); translocated to, 3	Source:HGNC Symbol;Acc:HGNC:7136]	2	-6.35755	4.27132	10.6034	6.63123e-08	5.16111e-06	8.5886
ENSOARG00000021174	ZFYVE26	zinc finger, FYVE domain containing 26	Source:HGNC Symbol;Acc:HGNC:20761]	7	-4.00832	4.49138	10.5962	6.68632e-08	5.17374e-06	8.61168
ENSOARG00000006389	PPM1B	protein phosphatase, Mg2+/Mn2+ dependent, 1B	Source:HGNC Symbol;Acc:HGNC:9276]	3	-3.87867	5.56086	10.5838	6.78135e-08	5.18695e-06	8.64002
ENSOARG00000020246	OSBPL11	oxysterol binding protein-like 11	Source:HGNC Symbol;Acc:HGNC:16397]	1	-4.63413	3.07524	10.5857	6.76729e-08	5.18695e-06	8.38696
ENSOARG00000004398	C11orf73	chromosome 11 open reading frame 73	Source:HGNC Symbol;Acc:HGNC:26938]	21	-5.29008	4.33236	10.5717	6.87632e-08	5.22954e-06	8.56704
ENSOARG00000010134	ARMCX2	armadillo repeat containing, X-linked 2	Source:HGNC Symbol;Acc:HGNC:16869]	X	-6.52734	3.25524	10.5439	7.0981e-08	5.36754e-06	8.36243
ENSOARG00000011019	CLCF1	cardiotrophin-like cytokine factor 1	Source:HGNC Symbol;Acc:HGNC:17412]	21	4.8608	3.62516	-10.5249	7.25474e-08	5.43805e-06	8.4335
ENSOARG00000009470	RNASEK	ribonuclease, RNase K	Source:HGNC Symbol;Acc:HGNC:33911]	11	-4.61796	4.96133	10.5227	7.27307e-08	5.43805e-06	8.55539
ENSOARG00000020374	ACSL3	acyl-CoA synthetase long-chain family member 3	Source:HGNC Symbol;Acc:HGNC:3570]	2	6.70716	7.22619	-10.5012	7.45499e-08	5.48971e-06	8.55491
ENSOARG00000008856	FBXO33	F-box protein 33	Source:HGNC Symbol;Acc:HGNC:19833]	18	4.92356	5.47173	-10.5005	7.46073e-08	5.48971e-06	8.54537
ENSOARG00000011041	ELL3	elongation factor RNA polymerase II-like 3	Source:HGNC Symbol;Acc:HGNC:23113]	18	4.4719	5.53886	-10.4912	7.54129e-08	5.48971e-06	8.5365
ENSOARG00000000286	GOLGA4	golgin A4	Source:HGNC Symbol;Acc:HGNC:4427]	19	-3.96457	6.22052	10.4904	7.54841e-08	5.48971e-06	8.54275
ENSOARG00000006079	P2RY10	purinergic receptor P2Y, G-protein coupled, 10	Source:HGNC Symbol;Acc:HGNC:19906]	X	-4.64624	6.05096	10.4989	7.47528e-08	5.48971e-06	8.5508
ENSOARG00000015698	MNT	MAX network transcriptional repressor	Source:HGNC Symbol;Acc:HGNC:7188]	11	5.18248	3.48868	-10.4283	8.10923e-08	5.64613e-06	8.30933
ENSOARG00000004601	JMJD1C	jumonji domain containing 1C	Source:HGNC Symbol;Acc:HGNC:12313]	25	4.69692	8.99243	-10.4251	8.1389e-08	5.64613e-06	8.4672
ENSOARG00000017741	RBBP6	retinoblastoma binding protein 6	Source:HGNC Symbol;Acc:HGNC:9889]	24	3.39221	7.51069	-10.4244	8.14529e-08	5.64613e-06	8.46896
ENSOARG00000012966	GNL1	guanine nucleotide binding protein-like 1	Source:HGNC Symbol;Acc:HGNC:4413]	20	3.26125	6.22811	-10.4305	8.08808e-08	5.64613e-06	8.47623
ENSOARG00000014581	TCIRG1	T-cell, immune regulator 1, ATPase, H+ transporting, lysosomal V0 subunit A3	Source:HGNC Symbol;Acc:HGNC:11647]	21	-3.77637	6.12639	10.4264	8.12629e-08	5.64613e-06	8.47104
ENSOARG00000006477	MARS	methionyl-tRNA synthetase	Source:HGNC Symbol;Acc:HGNC:6898]	3	-3.79206	6.87135	10.4576	7.83902e-08	5.64613e-06	8.50713
ENSOARG00000018897	IFT57	intraflagellar transport 57	Source:HGNC Symbol;Acc:HGNC:17367]	1	-4.72318	3.51973	10.4553	7.86031e-08	5.64613e-06	8.34498
ENSOARG00000000625		Uncharacterized protein	Source:UniProtKB/TrEMBL;Acc:W5NR50]	JH921595.1	-5.58094	5.43951	10.4401	7.99916e-08	5.64613e-06	8.47532
ENSOARG00000013590	LIMCH1	LIM and calponin homology domains 1	Source:HGNC Symbol;Acc:HGNC:29191]	6	-19.4948	0.0979231	10.4274	8.11777e-08	5.64613e-06	5.08759
ENSOARG00000001668	TFEC	transcription factor EC	Source:HGNC Symbol;Acc:HGNC:11754]	4	-14.1664	1.30484	10.4173	8.21297e-08	5.66354e-06	6.87841
ENSOARG00000016282	DGKQ	diacylglycerol kinase, theta 110kDa	Source:HGNC Symbol;Acc:HGNC:2856]	6	3.89483	4.08906	-10.4037	8.34338e-08	5.69446e-06	8.36989
ENSOARG00000018097	CTNNBL1	catenin, beta like 1	Source:HGNC Symbol;Acc:HGNC:15879]	13	-3.76072	6.17554	10.4061	8.31962e-08	5.69446e-06	8.44843
ENSOARG00000010627	NBEA	neurobeachin	Source:HGNC Symbol;Acc:HGNC:7648]	10	5.50075	4.14233	-10.387	8.50615e-08	5.73289e-06	8.35094
ENSOARG00000008776	PRPF6	pre-mRNA processing factor 6	Source:HGNC Symbol;Acc:HGNC:15860]	13	-4.49731	5.75526	10.3867	8.50866e-08	5.73289e-06	8.42294
ENSOARG00000019265	PARVB	parvin, beta	Source:HGNC Symbol;Acc:HGNC:14653]	3	-6.73137	2.74491	10.3847	8.52891e-08	5.73289e-06	8.06159
ENSOARG00000016662	TNFAIP8	tumor necrosis factor, alpha-induced protein 8	Source:HGNC Symbol;Acc:HGNC:17260]	5	-5.33769	3.76769	10.3506	8.8732e-08	5.93434e-06	8.26849
ENSOARG00000016873	UNG	uracil-DNA glycosylase	Source:HGNC Symbol;Acc:HGNC:12572]	17	3.53354	5.40374	-10.301	9.40135e-08	6.1245e-06	8.3229
ENSOARG00000014569		Uncharacterized protein	Source:UniProtKB/TrEMBL;Acc:W5PYU2]	1	-3.45816	4.59748	10.2973	9.44253e-08	6.1245e-06	8.29353
ENSOARG00000021009	GABARAPL1	GABA(A) receptor-associated protein like 1	Source:HGNC Symbol;Acc:HGNC:4068]	3	-3.63981	5.60226	10.3119	9.28274e-08	6.1245e-06	8.33802
ENSOARG00000008253	TAPBPL	TAP binding protein-like	Source:HGNC Symbol;Acc:HGNC:30683]	3	-4.15743	4.13241	10.2993	9.42028e-08	6.1245e-06	8.26083
ENSOARG00000003316	EZH1	enhancer of zeste 1 polycomb repressive complex 2 subunit	Source:HGNC Symbol;Acc:HGNC:3526]	11	-4.54412	4.98403	10.2939	9.47965e-08	6.1245e-06	8.30362
ENSOARG00000016251	CBX5	Ovis aries chromobox homolog 5 (CBX5), mRNA.	Source:RefSeq mRNA;Acc:NM_001166190]	3	-4.64892	3.7532	10.2957	9.45947e-08	6.1245e-06	8.21283
ENSOARG00000013072		Uncharacterized protein	Source:UniProtKB/TrEMBL;Acc:W5PU74]	15	-17.6281	-1.69581	10.2953	9.46382e-08	6.1245e-06	4.15157
ENSOARG00000013546	URGCP	upregulator of cell proliferation	Source:HGNC Symbol;Acc:HGNC:30890]	19	3.44336	5.64608	-10.2838	9.59177e-08	6.167e-06	8.30733
ENSOARG00000006593	NIPAL3	NIPA-like domain containing 3	Source:HGNC Symbol;Acc:HGNC:25233]	2	3.45565	6.44981	-10.2668	9.78542e-08	6.26126e-06	8.29175
ENSOARG00000021091	FBXO34	F-box protein 34	Source:HGNC Symbol;Acc:HGNC:20201]	7	3.57362	6.18132	-10.2612	9.84958e-08	6.27216e-06	8.28486
ENSOARG00000009700	MBD5	methyl-CpG binding domain protein 5	Source:HGNC Symbol;Acc:HGNC:20444]	2	12.4577	2.22724	-10.2536	9.93718e-08	6.28632e-06	7.50327
ENSOARG00000004216	TFB1M	transcription factor B1, mitochondrial	Source:HGNC Symbol;Acc:HGNC:17037]	8	-6.26274	2.28442	10.2511	9.9663e-08	6.28632e-06	7.7875
ENSOARG00000001174				20	7.24166	8.37965	-10.2157	1.0389e-07	6.49139e-06	8.23185
ENSOARG00000000405	PPP1R16B	protein phosphatase 1, regulatory subunit 16B	Source:HGNC Symbol;Acc:HGNC:15850]	13	3.87087	8.45783	-10.2165	1.03795e-07	6.49139e-06	8.23238
ENSOARG00000017158	TTC37	tetratricopeptide repeat domain 37	Source:HGNC Symbol;Acc:HGNC:23639]	5	-4.65152	4.28198	10.1847	1.0775e-07	6.68735e-06	8.14575
ENSOARG00000004673	PPP1R21	protein phosphatase 1, regulatory subunit 21	Source:HGNC Symbol;Acc:HGNC:30595]	3	-5.38571	3.41497	10.1825	1.08031e-07	6.68735e-06	8.03608
ENSOARG00000006286	SGPL1	sphingosine-1-phosphate lyase 1	Source:HGNC Symbol;Acc:HGNC:10817]	25	-5.69484	4.84518	10.1759	1.08873e-07	6.70829e-06	8.16383
ENSOARG00000011373	MIDN	midnolin	Source:HGNC Symbol;Acc:HGNC:16298]	5	5.06071	7.63449	-10.1694	1.09715e-07	6.72902e-06	8.17964
ENSOARG00000010982	PHF23	PHD finger protein 23	Source:HGNC Symbol;Acc:HGNC:28428]	11	-4.02831	4.98921	10.1595	1.11008e-07	6.77708e-06	8.15254
ENSOARG00000013524	HSPA4	heat shock 70kDa protein 4	Source:HGNC Symbol;Acc:HGNC:5237]	5	-3.44738	6.32938	10.1293	1.15033e-07	6.99077e-06	8.13427
ENSOARG00000006624	ACAS2	Uncharacterized protein	Source:UniProtKB/TrEMBL;Acc:W5P9I9]	13	4.32846	5.87736	-10.1233	1.15854e-07	7.00864e-06	8.12521
ENSOARG00000019440	DAD1	defender against cell death 1	Source:HGNC Symbol;Acc:HGNC:2664]	7	-4.78428	5.33602	10.1142	1.17115e-07	7.05286e-06	8.10837
ENSOARG00000002529		Uncharacterized protein	Source:UniProtKB/TrEMBL;Acc:W5NWY7]	19	6.06544	3.99409	-10.0966	1.19584e-07	7.1691e-06	8.01689
ENSOARG00000004342	UBN1	ubinuclein 1	Source:HGNC Symbol;Acc:HGNC:12506]	24	5.73833	8.07331	-10.0924	1.20174e-07	7.17218e-06	8.09067
ENSOARG00000006421	RUNX3	runt-related transcription factor 3	Source:HGNC Symbol;Acc:HGNC:10473]	2	3.6601	7.20327	-10.0849	1.21246e-07	7.18984e-06	8.08293
ENSOARG00000007277	TRIM41	tripartite motif containing 41	Source:HGNC Symbol;Acc:HGNC:19013]	5	-5.86269	3.53741	10.0828	1.2155e-07	7.18984e-06	7.94402
ENSOARG00000001739	TUBB6	tubulin, beta 6 class V	Source:HGNC Symbol;Acc:HGNC:20776]	23	6.10098	4.49014	-10.0789	1.22125e-07	7.19189e-06	8.03519
ENSOARG00000017119	AP3B1	adaptor-related protein complex 3, beta 1 subunit	Source:HGNC Symbol;Acc:HGNC:566]	7	-4.23826	5.43221	10.064	1.24304e-07	7.22428e-06	8.05292
ENSOARG00000000571	RHOH	Ovis aries ras homolog family member H (RHOH), mRNA.	Source:RefSeq mRNA;Acc:NM_001127286]	6	-4.87221	3.73201	10.0675	1.23784e-07	7.22428e-06	7.96094
ENSOARG00000017129	ZBED5	zinc finger, BED-type containing 5	Source:HGNC Symbol;Acc:HGNC:30803]	15	-6.00663	2.63997	10.071	1.23273e-07	7.22428e-06	7.73408
ENSOARG00000017178	C10orf76	chromosome 10 open reading frame 76	Source:HGNC Symbol;Acc:HGNC:25788]	22	-3.90885	3.29195	10.0553	1.25589e-07	7.26724e-06	7.89085
ENSOARG00000000411	TIGD2	tigger transposable element derived 2	Source:HGNC Symbol;Acc:HGNC:18333]	6	-4.4629	3.38168	10.0232	1.30495e-07	7.5184e-06	7.8665
ENSOARG00000003506	ATP6V1F	ATPase, H+ transporting, lysosomal 14kDa, V1 subunit F	Source:HGNC Symbol;Acc:HGNC:16832]	4	-3.30646	6.08263	10.0165	1.31541e-07	7.54604e-06	8.00321
ENSOARG00000010645	ZNF207	zinc finger protein 207	Source:HGNC Symbol;Acc:HGNC:12998]	11	-4.00885	7.88877	10.0105	1.32486e-07	7.56764e-06	7.99587
ENSOARG00000002548	UST	uronyl-2-sulfotransferase	Source:HGNC Symbol;Acc:HGNC:17223]	8	-13.2129	2.49541	10.0057	1.33251e-07	7.57878e-06	7.39598
ENSOARG00000015517	PLCL2	phospholipase C-like 2	Source:HGNC Symbol;Acc:HGNC:9064]	1	3.21419	8.09132	-9.99778	1.34512e-07	7.5857e-06	7.98087
ENSOARG00000015931	CCNH	cyclin H	Source:HGNC Symbol;Acc:HGNC:1594]	5	-3.92259	4.31914	9.99943	1.34249e-07	7.5857e-06	7.9433
ENSOARG00000008238	NSMCE2	non-SMC element 2, MMS21 homolog (S. cerevisiae)	Source:HGNC Symbol;Acc:HGNC:26513]	9	-2.9372	4.63905	9.99016	1.35745e-07	7.59086e-06	7.95079
ENSOARG00000003075				6	-4.05632	5.44865	9.99207	1.35434e-07	7.59086e-06	7.97055
ENSOARG00000004243	SDCCAG3	serologically defined colon cancer antigen 3	Source:HGNC Symbol;Acc:HGNC:10667]	3	3.57421	4.89203	-9.97938	1.37506e-07	7.6253e-06	7.94564
ENSOARG00000013525	PDCD1LG2	programmed cell death 1 ligand 2	Source:HGNC Symbol;Acc:HGNC:18731]	2	-10.0925	0.622222	9.98137	1.3718e-07	7.6253e-06	6.33936
ENSOARG00000017530	GNPNAT1	glucosamine-phosphate N-acetyltransferase 1	Source:HGNC Symbol;Acc:HGNC:19980]	7	-5.58104	3.32404	9.96747	1.39481e-07	7.7027e-06	7.78771
ENSOARG00000006306	BRPF1	bromodomain and PHD finger containing, 1	Source:HGNC Symbol;Acc:HGNC:14255]	19	4.3765	6.46922	-9.93882	1.44359e-07	7.93914e-06	7.91282
ENSOARG00000011149	AIM1	absent in melanoma 1	Source:HGNC Symbol;Acc:HGNC:356]	8	-4.55407	4.77959	9.92237	1.47239e-07	8.06424e-06	7.87448
ENSOARG00000012251	CAPN15	calpain 15	Source:HGNC Symbol;Acc:HGNC:11182]	24	5.19005	3.58513	-9.91116	1.49238e-07	8.1402e-06	7.76954
ENSOARG00000010111		Uncharacterized protein	Source:UniProtKB/TrEMBL;Acc:W5PK70]	X	-4.9918	2.23793	9.90651	1.50077e-07	8.15255e-06	7.45507
ENSOARG00000001378	NAPG	N-ethylmaleimide-sensitive factor attachment protein, gamma	Source:HGNC Symbol;Acc:HGNC:7642]	23	4.89002	5.51378	-9.87165	1.56517e-07	8.36578e-06	7.83037
ENSOARG00000017788	SIRT7	sirtuin 7	Source:HGNC Symbol;Acc:HGNC:14935]	11	2.96245	5.43701	-9.87435	1.56008e-07	8.36578e-06	7.83409
ENSOARG00000003799	ATG13	autophagy related 13	Source:HGNC Symbol;Acc:HGNC:29091]	15	2.87135	5.72412	-9.87709	1.55493e-07	8.36578e-06	7.83907
ENSOARG00000012692	MOGS	mannosyl-oligosaccharide glucosidase	Source:HGNC Symbol;Acc:HGNC:24862]	3	-5.1104	3.71383	9.87728	1.55458e-07	8.36578e-06	7.74662
ENSOARG00000007099		Uncharacterized protein	Source:UniProtKB/TrEMBL;Acc:W5PB00]	AMGL01130292.1	7.5007	6.72898	-9.84247	1.62135e-07	8.56293e-06	7.79902
ENSOARG00000014967	AHI1	Abelson helper integration site 1	Source:HGNC Symbol;Acc:HGNC:21575]	8	-4.34387	4.48694	9.84475	1.6169e-07	8.56293e-06	7.77486
ENSOARG00000020132	FAM162A	family with sequence similarity 162, member A	Source:HGNC Symbol;Acc:HGNC:17865]	1	-6.47673	3.9254	9.84844	1.6097e-07	8.56293e-06	7.72907
ENSOARG00000009880	ZEB2	zinc finger E-box binding homeobox 2	Source:HGNC Symbol;Acc:HGNC:14881]	2	-4.12351	6.41905	9.80581	1.69501e-07	8.91654e-06	7.75599
ENSOARG00000003503	CIRH1A	cirrhosis, autosomal recessive 1A (cirhin)	Source:HGNC Symbol;Acc:HGNC:1983]	14	3.48337	5.55218	-9.79578	1.71577e-07	8.91999e-06	7.74219
ENSOARG00000019490	CEPT1	choline/ethanolamine phosphotransferase 1	Source:HGNC Symbol;Acc:HGNC:24289]	1	-4.36993	4.68123	9.80079	1.70536e-07	8.91999e-06	7.73196
ENSOARG00000004425	INO80E	INO80 complex subunit E	Source:HGNC Symbol;Acc:HGNC:26905]	24	-4.39372	4.20991	9.79887	1.70934e-07	8.91999e-06	7.70627
ENSOARG00000020516	MAT2A	methionine adenosyltransferase II, alpha	Source:HGNC Symbol;Acc:HGNC:6904]	3	3.23823	7.50361	-9.79026	1.72731e-07	8.94504e-06	7.73739
ENSOARG00000010651	RAB5B	RAB5B, member RAS oncogene family	Source:HGNC Symbol;Acc:HGNC:9784]	3	-5.51864	3.43645	9.77663	1.75616e-07	9.02424e-06	7.5955
ENSOARG00000004421	CDKN2C	cyclin-dependent kinase inhibitor 2C (p18, inhibits CDK4)	Source:HGNC Symbol;Acc:HGNC:1789]	1	-7.81521	1.75481	9.77747	1.75437e-07	9.02424e-06	7.05056
ENSOARG00000016099	MEF2C	Ovis aries myocyte enhancer factor 2C (MEF2C), mRNA.	Source:RefSeq mRNA;Acc:NM_001159277]	5	-4.46998	6.48772	9.76865	1.77329e-07	9.04244e-06	7.71182
ENSOARG00000008903	CHN2	chimerin 2	Source:HGNC Symbol;Acc:HGNC:1944]	4	-7.18265	3.02227	9.77012	1.77012e-07	9.04244e-06	7.49496
ENSOARG00000015367	BNIP3	BCL2/adenovirus E1B 19kDa interacting protein 3	Source:HGNC Symbol;Acc:HGNC:1084]	22	-7.31717	4.85434	9.74684	1.82103e-07	9.2504e-06	7.66764
ENSOARG00000017862	HIAT1	hippocampus abundant transcript 1	Source:HGNC Symbol;Acc:HGNC:23363]	1	3.61446	6.82866	-9.74155	1.83281e-07	9.2738e-06	7.67959
ENSOARG00000010543	PREX1	phosphatidylinositol-3,4,5-trisphosphate-dependent Rac exchange factor 1	Source:HGNC Symbol;Acc:HGNC:32594]	13	-3.09131	7.76106	9.73853	1.83957e-07	9.2738e-06	7.67573
ENSOARG00000006977	SETD5	SET domain containing 5	Source:HGNC Symbol;Acc:HGNC:25566]	19	-3.13103	6.66132	9.72656	1.86665e-07	9.31324e-06	7.6617
ENSOARG00000013259	FUBP1	far upstream element (FUSE) binding protein 1	Source:HGNC Symbol;Acc:HGNC:4004]	1	-4.20314	6.57198	9.7254	1.86929e-07	9.31324e-06	7.66028
ENSOARG00000017126		Uncharacterized protein	Source:UniProtKB/TrEMBL;Acc:W5Q6Q4]	X	-4.38996	5.53305	9.72274	1.87538e-07	9.31324e-06	7.65508
ENSOARG00000015911		Uncharacterized protein	Source:UniProtKB/TrEMBL;Acc:W5Q2Z5]	X	-5.49221	5.72025	9.72771	1.86402e-07	9.31324e-06	7.66139
ENSOARG00000003809	SMAD7	SMAD family member 7	Source:HGNC Symbol;Acc:HGNC:6773]	23	4.51504	5.4282	-9.71526	1.89259e-07	9.32907e-06	7.64526
ENSOARG00000013183	SYT7	synaptotagmin VII	Source:HGNC Symbol;Acc:HGNC:11514]	21	-7.56988	1.94652	9.7159	1.89113e-07	9.32907e-06	7.07821
ENSOARG00000009726	TRIM35	tripartite motif containing 35	Source:HGNC Symbol;Acc:HGNC:16285]	2	4.09767	6.3043	-9.70343	1.92017e-07	9.36099e-06	7.63393
ENSOARG00000000468		Uncharacterized protein	Source:UniProtKB/TrEMBL;Acc:W5NQN0]	10	-4.49251	3.59969	9.70617	1.91374e-07	9.36099e-06	7.54657
ENSOARG00000000552	TLR6	Ovis aries toll-like receptor 6 (TLR6), mRNA.	Source:RefSeq mRNA;Acc:NM_001135927]	6	-5.8615	4.6067	9.70541	1.91552e-07	9.36099e-06	7.6147
ENSOARG00000008997	PYGM	Ovis aries phosphorylase, glycogen, muscle (PYGM), mRNA.	Source:RefSeq mRNA;Acc:NM_001009192]	21	5.14629	5.12728	-9.69724	1.93477e-07	9.39777e-06	7.62011
ENSOARG00000002961		Uncharacterized protein	Source:UniProtKB/TrEMBL;Acc:W5NY98]	6	4.93312	5.01323	-9.65956	2.02621e-07	9.79594e-06	7.57366
ENSOARG00000008893	SLAMF1	Ovis aries signaling lymphocytic activation molecule family member 1 (SLAMF1), mRNA.	Source:RefSeq mRNA;Acc:NM_001040288]	1	-4.07481	3.86108	9.65745	2.03147e-07	9.79594e-06	7.51901
ENSOARG00000000520	TLR10	Ovis aries toll-like receptor 10 (TLR10), mRNA.	Source:RefSeq mRNA;Acc:NM_001135925]	6	-8.90191	1.80042	9.64365	2.06621e-07	9.9275e-06	6.8998
ENSOARG00000004276	SNX9	sorting nexin 9	Source:HGNC Symbol;Acc:HGNC:14973]	8	3.3394	6.63358	-9.61981	2.1277e-07	1.01637e-05	7.53343
ENSOARG00000015317	SRR	serine racemase	Source:HGNC Symbol;Acc:HGNC:14398]	11	3.30241	4.67284	-9.61869	2.13064e-07	1.01637e-05	7.51977
ENSOARG00000011895	MOSPD2	motile sperm domain containing 2	Source:HGNC Symbol;Acc:HGNC:28381]	X	-4.33577	4.55485	9.61384	2.1434e-07	1.01825e-05	7.50907
ENSOARG00000016220	COPZ1	coatomer protein complex, subunit zeta 1	Source:HGNC Symbol;Acc:HGNC:2243]	3	-3.04457	6.05652	9.58297	2.2266e-07	1.05084e-05	7.48891
ENSOARG00000011043	ZC3HAV1	zinc finger CCCH-type, antiviral 1	Source:HGNC Symbol;Acc:HGNC:23721]	4	2.97302	8.53222	-9.57471	2.24944e-07	1.05415e-05	7.4788
ENSOARG00000004883	OBFC1	oligonucleotide/oligosaccharide-binding fold containing 1	Source:HGNC Symbol;Acc:HGNC:26200]	22	-4.74084	3.86549	9.57626	2.24514e-07	1.05415e-05	7.42277
ENSOARG00000017239	MRPL34	mitochondrial ribosomal protein L34	Source:HGNC Symbol;Acc:HGNC:14488]	5	-6.42207	2.26935	9.5628	2.2828e-07	1.06603e-05	7.08162
ENSOARG00000011347	FBRSL1	fibrosin-like 1	Source:HGNC Symbol;Acc:HGNC:29308]	17	4.06977	5.77847	-9.55745	2.29797e-07	1.06936e-05	7.45782
ENSOARG00000006411	MED27	mediator complex subunit 27	Source:HGNC Symbol;Acc:HGNC:2377]	3	-3.4289	4.01209	9.55265	2.31165e-07	1.07198e-05	7.41201
ENSOARG00000001110	SBK1	SH3 domain binding kinase 1	Source:HGNC Symbol;Acc:HGNC:17699]	24	7.15491	4.68859	-9.54983	2.31973e-07	1.07199e-05	7.4316
ENSOARG00000009630	MLLT6	myeloid/lymphoid or mixed-lineage leukemia (trithorax homolog, Drosophila); translocated to, 6	Source:HGNC Symbol;Acc:HGNC:7138]	11	3.87958	5.6915	-9.54433	2.33561e-07	1.07559e-05	7.44183
ENSOARG00000003602		Uncharacterized protein	Source:UniProtKB/TrEMBL;Acc:W5P095]	14	4.66249	3.91988	-9.51004	2.4371e-07	1.11846e-05	7.35048
ENSOARG00000010625	ABCG1	ATP-binding cassette, sub-family G (WHITE), member 1	Source:HGNC Symbol;Acc:HGNC:73]	1	3.77187	6.30059	-9.50647	2.44791e-07	1.11956e-05	7.39596
ENSOARG00000017007	GGA2	golgi-associated, gamma adaptin ear containing, ARF binding protein 2	Source:HGNC Symbol;Acc:HGNC:16064]	24	-4.91897	4.5477	9.49794	2.474e-07	1.12762e-05	7.3698
ENSOARG00000008216	PDP1	pyruvate dehyrogenase phosphatase catalytic subunit 1	Source:HGNC Symbol;Acc:HGNC:9279]	9	4.22672	4.21823	-9.48614	2.5106e-07	1.13883e-05	7.34387
ENSOARG00000015532	INTS2	integrator complex subunit 2	Source:HGNC Symbol;Acc:HGNC:29241]	11	-4.46883	2.9636	9.4845	2.51572e-07	1.13883e-05	7.20144
ENSOARG00000006741	INTS4	integrator complex subunit 4	Source:HGNC Symbol;Acc:HGNC:25048]	21	-3.24333	4.09117	9.47821	2.53551e-07	1.1439e-05	7.32981
ENSOARG00000007206	FAM177A1	family with sequence similarity 177, member A1	Source:HGNC Symbol;Acc:HGNC:19829]	18	4.35747	5.27311	-9.46017	2.59316e-07	1.15414e-05	7.33811
ENSOARG00000010958	SLC25A25	solute carrier family 25 (mitochondrial carrier; phosphate carrier), member 25	Source:HGNC Symbol;Acc:HGNC:20663]	3	3.89841	5.6637	-9.45652	2.605e-07	1.15414e-05	7.33507
ENSOARG00000020774	EIF2AK3	eukaryotic translation initiation factor 2-alpha kinase 3	Source:HGNC Symbol;Acc:HGNC:3255]	3	3.61492	7.23759	-9.4496	2.62757e-07	1.15414e-05	7.32643
ENSOARG00000008207	SETD1A	SET domain containing 1A	Source:HGNC Symbol;Acc:HGNC:29010]	24	3.26793	6.08325	-9.45175	2.62055e-07	1.15414e-05	7.32917
ENSOARG00000016888	IQGAP2	IQ motif containing GTPase activating protein 2	Source:HGNC Symbol;Acc:HGNC:6111]	7	-3.39962	6.38787	9.46315	2.58353e-07	1.15414e-05	7.34297
ENSOARG00000016471	FAM49A	family with sequence similarity 49, member A	Source:HGNC Symbol;Acc:HGNC:25373]	3	-4.75569	3.79926	9.45164	2.62092e-07	1.15414e-05	7.27252
ENSOARG00000017557	SPECC1	sperm antigen with calponin homology and coiled-coil domains 1	Source:HGNC Symbol;Acc:HGNC:30615]	11	-5.08158	2.48826	9.46687	2.57157e-07	1.15414e-05	7.06319
ENSOARG00000014852	BBS10	Bardet-Biedl syndrome 10	Source:HGNC Symbol;Acc:HGNC:26291]	3	-6.82762	1.73044	9.45884	2.59746e-07	1.15414e-05	6.76283
ENSOARG00000011738		Uncharacterized protein	Source:UniProtKB/TrEMBL;Acc:W5PQ53]	1	5.99685	6.82148	-9.42648	2.70459e-07	1.18406e-05	7.29807
ENSOARG00000005525	MALT1	MALT1 paracaspase	Source:HGNC Symbol;Acc:HGNC:6819]	23	3.98258	7.39457	-9.41415	2.74666e-07	1.19072e-05	7.28296
ENSOARG00000005469	USP7	ubiquitin specific peptidase 7 (herpes virus-associated)	Source:HGNC Symbol;Acc:HGNC:12630]	24	2.76974	8.42859	-9.41801	2.73339e-07	1.19072e-05	7.28798
ENSOARG00000002454		Uncharacterized protein	Source:UniProtKB/TrEMBL;Acc:W5NWS2]	5	-4.88166	4.66621	9.41628	2.73931e-07	1.19072e-05	7.27605
ENSOARG00000013780	CNNM4	cyclin and CBS domain divalent metal cation transport mediator 4	Source:HGNC Symbol;Acc:HGNC:105]	3	3.35564	4.68491	-9.40246	2.78715e-07	1.20039e-05	7.26131
ENSOARG00000004268		Uncharacterized protein	Source:UniProtKB/TrEMBL;Acc:W5P2C0]	12	-4.25008	5.91776	9.40248	2.78708e-07	1.20039e-05	7.26892
ENSOARG00000006349	AP2B1	adaptor-related protein complex 2, beta 1 subunit	Source:HGNC Symbol;Acc:HGNC:563]	11	-4.46753	5.89995	9.39993	2.796e-07	1.20039e-05	7.2658
ENSOARG00000007589	DBR1	debranching RNA lariats 1	Source:HGNC Symbol;Acc:HGNC:15594]	1	3.09933	4.92556	-9.38271	2.85702e-07	1.21872e-05	7.24146
ENSOARG00000000399	TBC1D2B	TBC1 domain family, member 2B	Source:HGNC Symbol;Acc:HGNC:29183]	18	-4.58235	4.03542	9.38404	2.85227e-07	1.21872e-05	7.21164
ENSOARG00000006928	KARS	lysyl-tRNA synthetase	Source:HGNC Symbol;Acc:HGNC:6215]	14	3.09526	8.47825	-9.37743	2.87602e-07	1.21919e-05	7.23811
ENSOARG00000015689	PARPBP	PARP1 binding protein	Source:HGNC Symbol;Acc:HGNC:26074]	3	-4.6878	1.88742	9.37731	2.87645e-07	1.21919e-05	6.79525
ENSOARG00000012702	PRKRIR	protein-kinase, interferon-inducible double stranded RNA dependent inhibitor, repressor of (P58 repressor)	Source:HGNC Symbol;Acc:HGNC:9440]	15	3.33691	5.70059	-9.36862	2.90802e-07	1.22866e-05	7.22736
ENSOARG00000014910	ELP3	elongator acetyltransferase complex subunit 3	Source:HGNC Symbol;Acc:HGNC:20696]	2	-3.53053	3.43398	9.35717	2.9502e-07	1.24028e-05	7.13225
ENSOARG00000007490		Uncharacterized protein	Source:UniProtKB/TrEMBL;Acc:W5PC69]	9	-4.57459	4.1367	9.3561	2.95417e-07	1.24028e-05	7.18435
ENSOARG00000015056	APP	Amyloid beta A4 protein Soluble APP-beta CTF-alpha Beta-amyloid protein 42 Beta-amyloid protein 40 Gamma-secretase C-terminal fragment 59 Gamma-secretase C-terminal fragment 57	Source:UniProtKB/Swiss-Prot;Acc:Q28757]	1	-4.45367	6.00195	9.34659	2.98972e-07	1.24734e-05	7.20005
ENSOARG00000007452	HSPA6	heat shock 70kDa protein 6 (HSP70B')	Source:HGNC Symbol;Acc:HGNC:5239]	1	-23.4319	5.08561	9.34819	2.9837e-07	1.24734e-05	7.07571
ENSOARG00000006603	PCBP4	poly(rC) binding protein 4	Source:HGNC Symbol;Acc:HGNC:8652]	19	6.29813	2.75601	-9.33815	3.02164e-07	1.25281e-05	6.97422
ENSOARG00000004182	ELK4	ELK4, ETS-domain protein (SRF accessory protein 1)	Source:HGNC Symbol;Acc:HGNC:3326]	12	3.91397	8.05355	-9.33818	3.02154e-07	1.25281e-05	7.18955
ENSOARG00000014214	CCR5	chemokine (C-C motif) receptor 5 (gene/pseudogene)	Source:HGNC Symbol;Acc:HGNC:1606]	19	-6.52445	3.92552	9.32744	3.0627e-07	1.26588e-05	7.12876
ENSOARG00000017217	GPR183	G protein-coupled receptor 183	Source:HGNC Symbol;Acc:HGNC:3128]	10	-4.70932	7.68811	9.32019	3.09083e-07	1.27356e-05	7.1671
ENSOARG00000011432	GINS2	GINS complex subunit 2 (Psf2 homolog)	Source:HGNC Symbol;Acc:HGNC:24575]	14	4.64967	4.55531	-9.31747	3.10146e-07	1.27399e-05	7.15373
ENSOARG00000020868	AK2	adenylate kinase 2	Source:HGNC Symbol;Acc:HGNC:362]	2	-3.24373	5.3099	9.31253	3.12086e-07	1.27802e-05	7.15804
ENSOARG00000005862	LRBA	LPS-responsive vesicle trafficking, beach and anchor containing	Source:HGNC Symbol;Acc:HGNC:1742]	17	4.68113	5.40025	-9.30897	3.13492e-07	1.27984e-05	7.15363
ENSOARG00000001750	PEAK1	pseudopodium-enriched atypical kinase 1	Source:HGNC Symbol;Acc:HGNC:29431]	18	-7.04138	3.23562	9.30503	3.15053e-07	1.28228e-05	7.02132
ENSOARG00000013729	LATS2	large tumor suppressor kinase 2	Source:HGNC Symbol;Acc:HGNC:6515]	10	5.10667	5.92564	-9.29438	3.19321e-07	1.28783e-05	7.1356
ENSOARG00000011601	R3HCC1L	R3H domain and coiled-coil containing 1-like	Source:HGNC Symbol;Acc:HGNC:23512]	22	-3.61479	3.82906	9.29536	3.18925e-07	1.28783e-05	7.09486
ENSOARG00000013330	DNMBP	dynamin binding protein	Source:HGNC Symbol;Acc:HGNC:30373]	22	-5.05167	3.52637	9.29514	3.19016e-07	1.28783e-05	7.06279
ENSOARG00000002700		Uncharacterized protein	Source:UniProtKB/TrEMBL;Acc:W5NXH3]	14	-5.30627	5.22733	9.28995	3.21114e-07	1.29115e-05	7.12931
ENSOARG00000011066	KCNQ5	potassium channel, voltage gated KQT-like subfamily Q, member 5	Source:HGNC Symbol;Acc:HGNC:6299]	9	5.38974	2.38282	-9.28252	3.24148e-07	1.29754e-05	6.83023
ENSOARG00000004604	TSC22D2	TSC22 domain family, member 2	Source:HGNC Symbol;Acc:HGNC:29095]	1	5.02119	6.09997	-9.28128	3.24654e-07	1.29754e-05	7.11908
ENSOARG00000002831	IMPDH1	IMP (inosine 5'-monophosphate) dehydrogenase 1	Source:HGNC Symbol;Acc:HGNC:6052]	4	4.01744	3.96861	-9.25184	3.36992e-07	1.33483e-05	7.05023
ENSOARG00000010335		Uncharacterized protein	Source:UniProtKB/TrEMBL;Acc:W5PKW0]	3	-2.61517	6.69884	9.25633	3.35077e-07	1.33483e-05	7.08704
ENSOARG00000020249	CD2	CD2 molecule	Source:HGNC Symbol;Acc:HGNC:1639]	1	-3.3446	6.45559	9.25415	3.36006e-07	1.33483e-05	7.08475
ENSOARG00000009618	EPC2	enhancer of polycomb homolog 2 (Drosophila)	Source:HGNC Symbol;Acc:HGNC:24543]	2	2.80105	5.28435	-9.23487	3.44328e-07	1.35635e-05	7.06199
ENSOARG00000018185	MAP2K1	mitogen-activated protein kinase kinase 1	Source:HGNC Symbol;Acc:HGNC:6840]	7	-5.17258	4.64475	9.23456	3.44464e-07	1.35635e-05	7.05302
ENSOARG00000015404	MAP2K4	mitogen-activated protein kinase kinase 4	Source:HGNC Symbol;Acc:HGNC:6844]	11	4.06328	3.70858	-9.22508	3.48639e-07	1.36472e-05	7.00124
ENSOARG00000006591	ARHGAP9	Rho GTPase activating protein 9	Source:HGNC Symbol;Acc:HGNC:14130]	3	-4.79264	4.91263	9.22558	3.48416e-07	1.36472e-05	7.04807
ENSOARG00000017459	MTX3	metaxin 3	Source:HGNC Symbol;Acc:HGNC:24812]	7	5.65416	4.02418	-9.21043	3.55196e-07	1.37855e-05	6.99989
ENSOARG00000020904	POLR1B	polymerase (RNA) I polypeptide B, 128kDa	Source:HGNC Symbol;Acc:HGNC:20454]	3	3.09783	5.90156	-9.20795	3.56316e-07	1.37855e-05	7.02753
ENSOARG00000004814	LPCAT3	lysophosphatidylcholine acyltransferase 3	Source:HGNC Symbol;Acc:HGNC:30244]	3	3.04559	6.26309	-9.2088	3.55931e-07	1.37855e-05	7.02785
ENSOARG00000019605	BRD1	bromodomain containing 1	Source:HGNC Symbol;Acc:HGNC:1102]	3	4.46908	5.94276	-9.2023	3.58888e-07	1.38448e-05	7.02071
ENSOARG00000010895	TULP3	tubby like protein 3	Source:HGNC Symbol;Acc:HGNC:12425]	3	5.72624	2.86459	-9.18928	3.64894e-07	1.38753e-05	6.8378
ENSOARG00000004478	CPTP	ceramide-1-phosphate transfer protein	Source:HGNC Symbol;Acc:HGNC:28116]	12	4.15273	5.34904	-9.19167	3.63782e-07	1.38753e-05	7.00825
ENSOARG00000012473	RAP2C	RAP2C, member of RAS oncogene family	Source:HGNC Symbol;Acc:HGNC:21165]	X	3.75228	5.84866	-9.19045	3.64349e-07	1.38753e-05	7.0059
ENSOARG00000015738	ADH5	alcohol dehydrogenase 5 (class III), chi polypeptide	Source:HGNC Symbol;Acc:HGNC:253]	6	-4.43001	5.46453	9.19131	3.63948e-07	1.38753e-05	7.00779
ENSOARG00000000982	TMEM180	transmembrane protein 180	Source:HGNC Symbol;Acc:HGNC:26196]	22	-7.7539	3.49195	9.19583	3.6186e-07	1.38753e-05	6.9231
ENSOARG00000002433	DDX3X	DEAD (Asp-Glu-Ala-Asp) box helicase 3, X-linked	Source:HGNC Symbol;Acc:HGNC:2745]	X	4.3511	10.9682	-9.18588	3.66477e-07	1.38958e-05	7.00077
ENSOARG00000004403	ARID5B	AT rich interactive domain 5B (MRF1-like)	Source:HGNC Symbol;Acc:HGNC:17362]	25	-5.2129	6.91943	9.17318	3.72463e-07	1.40827e-05	6.98316
ENSOARG00000013868	ADNP	activity-dependent neuroprotector homeobox	Source:HGNC Symbol;Acc:HGNC:15766]	13	2.98082	7.22037	-9.16551	3.76127e-07	1.41809e-05	6.97356
ENSOARG00000017797	FRYL	FRY-like	Source:HGNC Symbol;Acc:HGNC:29127]	6	-5.23459	5.79856	9.14134	3.8793e-07	1.45846e-05	6.94481
ENSOARG00000010927	GPKOW	G patch domain and KOW motifs	Source:HGNC Symbol;Acc:HGNC:30677]	X	-3.15428	4.5443	9.13615	3.90518e-07	1.46406e-05	6.93334
ENSOARG00000002051	TUBA1C	tubulin, alpha 1c	Source:HGNC Symbol;Acc:HGNC:20768]	1	3.61438	7.27866	-9.12899	3.94113e-07	1.47338e-05	6.92763
ENSOARG00000009737	PROSER1	proline and serine rich 1	Source:HGNC Symbol;Acc:HGNC:20291]	10	2.7934	4.57003	-9.11526	4.01114e-07	1.49118e-05	6.90797
ENSOARG00000008331	STX4	syntaxin 4	Source:HGNC Symbol;Acc:HGNC:11439]	24	-3.03872	4.56442	9.11741	4.00009e-07	1.49118e-05	6.91061
ENSOARG00000010353	HNMT	histamine N-methyltransferase	Source:HGNC Symbol;Acc:HGNC:5028]	2	-8.3088	2.32646	9.10085	4.08596e-07	1.51477e-05	6.56324
ENSOARG00000019278	THTPA	thiamine triphosphatase	Source:HGNC Symbol;Acc:HGNC:18987]	7	-5.61394	3.04039	9.08873	4.15008e-07	1.53426e-05	6.75366
ENSOARG00000004146	FBXW7	F-box and WD repeat domain containing 7, E3 ubiquitin protein ligase	Source:HGNC Symbol;Acc:HGNC:16712]	17	6.15801	6.30561	-9.0807	4.19315e-07	1.53563e-05	6.86742
ENSOARG00000017613	SLC12A2	solute carrier family 12 (sodium/potassium/chloride transporter), member 2	Source:HGNC Symbol;Acc:HGNC:10911]	5	3.63543	5.64474	-9.08059	4.19376e-07	1.53563e-05	6.8682
ENSOARG00000008081	NDUFS4	NADH dehydrogenase (ubiquinone) Fe-S protein 4, 18kDa (NADH-coenzyme Q reductase)	Source:HGNC Symbol;Acc:HGNC:7711]	16	-4.09133	4.12579	9.08391	4.17588e-07	1.53563e-05	6.85576
ENSOARG00000000648	DPH2	DPH2 homolog (S. cerevisiae)	Source:HGNC Symbol;Acc:HGNC:3004]	1	-4.58779	2.56158	9.07944	4.19993e-07	1.53563e-05	6.66549
ENSOARG00000013664	SKA3	spindle and kinetochore associated complex subunit 3	Source:HGNC Symbol;Acc:HGNC:20262]	10	5.48961	2.73558	-9.06805	4.26198e-07	1.54558e-05	6.67874
ENSOARG00000019508	SLC38A1	solute carrier family 38, member 1	Source:HGNC Symbol;Acc:HGNC:13447]	3	-3.14323	6.46058	9.06852	4.25936e-07	1.54558e-05	6.85059
ENSOARG00000016665	ORC2	origin recognition complex, subunit 2	Source:HGNC Symbol;Acc:HGNC:8488]	2	-6.05694	3.0319	9.07057	4.24812e-07	1.54558e-05	6.727
ENSOARG00000019074	NYNRIN	NYN domain and retroviral integrase containing	Source:HGNC Symbol;Acc:HGNC:20165]	7	6.10481	1.78418	-9.0597	4.30803e-07	1.55803e-05	6.38369
ENSOARG00000021151	ZBTB25	zinc finger and BTB domain containing 25	Source:HGNC Symbol;Acc:HGNC:13112]	7	-9.16679	0.612338	9.05392	4.34024e-07	1.56543e-05	5.61593
ENSOARG00000009166	SF1	splicing factor 1	Source:HGNC Symbol;Acc:HGNC:12950]	21	4.05827	8.63672	-9.04668	4.38095e-07	1.57584e-05	6.82457
ENSOARG00000013189	TXLNG	taxilin gamma	Source:HGNC Symbol;Acc:HGNC:18578]	X	3.09185	5.21654	-9.03811	4.42963e-07	1.58905e-05	6.81559
ENSOARG00000006797	LECT1	leukocyte cell derived chemotaxin 1	Source:HGNC Symbol;Acc:HGNC:17005]	10	4.21844	3.75584	-9.03478	4.4487e-07	1.59006e-05	6.77501
ENSOARG00000004826	SIRT1	sirtuin 1	Source:HGNC Symbol;Acc:HGNC:14929]	25	3.84822	6.82748	-9.03138	4.46827e-07	1.59006e-05	6.80338
ENSOARG00000014426	NUDCD1	NudC domain containing 1	Source:HGNC Symbol;Acc:HGNC:24306]	9	-3.36248	3.876	9.0321	4.46411e-07	1.59006e-05	6.78161
ENSOARG00000008858	PAG1	phosphoprotein membrane anchor with glycosphingolipid microdomains 1	Source:HGNC Symbol;Acc:HGNC:30043]	9	-4.49444	5.38393	9.0282	4.48667e-07	1.59235e-05	6.80301
ENSOARG00000018858	PJA2	praja ring finger 2, E3 ubiquitin protein ligase	Source:HGNC Symbol;Acc:HGNC:17481]	5	3.16894	7.46082	-9.01943	4.53782e-07	1.60622e-05	6.78876
ENSOARG00000003024	TSSC4	tumor suppressing subtransferable candidate 4	Source:HGNC Symbol;Acc:HGNC:12386]	21	6.17179	4.00396	-9.0085	4.60238e-07	1.62475e-05	6.75204
ENSOARG00000000304	ACKR3	atypical chemokine receptor 3	Source:HGNC Symbol;Acc:HGNC:23692]	1	-6.33703	5.38447	9.00065	4.64935e-07	1.63699e-05	6.76834
ENSOARG00000020857	DUSP16	dual specificity phosphatase 16	Source:HGNC Symbol;Acc:HGNC:17909]	3	4.65846	4.42857	-8.99228	4.70007e-07	1.65048e-05	6.75107
ENSOARG00000020560	SENP2	SUMO1/sentrin/SMT3 specific peptidase 2	Source:HGNC Symbol;Acc:HGNC:23116]	1	2.9991	6.95819	-8.98666	4.73437e-07	1.65815e-05	6.74629
ENSOARG00000012621	SLCO4A1	solute carrier organic anion transporter family, member 4A1	Source:HGNC Symbol;Acc:HGNC:10953]	13	7.77085	5.50201	-8.98291	4.75747e-07	1.66187e-05	6.74588
ENSOARG00000013309	IFNAR2	Ovis aries interferon (alpha, beta and omega) receptor 2 (IFNAR2), mRNA.	Source:RefSeq mRNA;Acc:NM_001009342]	1	2.90795	7.38305	-8.97983	4.77646e-07	1.66413e-05	6.73809
ENSOARG00000010919	STX17	syntaxin 17	Source:HGNC Symbol;Acc:HGNC:11432]	2	-5.03062	2.79362	8.97084	4.83251e-07	1.67927e-05	6.57899
ENSOARG00000010018		Uncharacterized protein	Source:UniProtKB/TrEMBL;Acc:W5PJX3]	12	3.79319	3.73573	-8.96424	4.87411e-07	1.68931e-05	6.68491
ENSOARG00000008638	SLC35F1	solute carrier family 35, member F1	Source:HGNC Symbol;Acc:HGNC:21483]	8	-12.8285	-2.39408	8.96136	4.89233e-07	1.69122e-05	3.2963
ENSOARG00000014989	TUBB3	tubulin, beta 3 class III	Source:HGNC Symbol;Acc:HGNC:20772]	14	4.27039	5.01158	-8.94516	4.99646e-07	1.70071e-05	6.69795
ENSOARG00000020991	NRF-2	Uncharacterized protein	Source:UniProtKB/TrEMBL;Acc:W5QIK6]	7	3.86705	4.85978	-8.94829	4.97617e-07	1.70071e-05	6.70157
ENSOARG00000020389	PPP1R2	protein phosphatase 1, regulatory (inhibitor) subunit 2	Source:HGNC Symbol;Acc:HGNC:9288]	1	3.70234	6.02989	-8.94825	4.97641e-07	1.70071e-05	6.69817
ENSOARG00000014860	ZNF518A	zinc finger protein 518A	Source:HGNC Symbol;Acc:HGNC:29009]	22	3.30758	5.53918	-8.94544	4.99459e-07	1.70071e-05	6.6967
ENSOARG00000010432	PDCD4	programmed cell death 4 (neoplastic transformation inhibitor)	Source:HGNC Symbol;Acc:HGNC:8763]	22	-3.78008	8.03274	8.95087	4.95946e-07	1.70071e-05	6.7018
ENSOARG00000011978	MIEN1	migration and invasion enhancer 1	Source:HGNC Symbol;Acc:HGNC:28230]	11	-5.01917	3.1016	8.95072	4.96045e-07	1.70071e-05	6.60524
ENSOARG00000002382	POMT2	protein-O-mannosyltransferase 2	Source:HGNC Symbol;Acc:HGNC:19743]	7	2.90224	4.88253	-8.93615	5.05531e-07	1.71199e-05	6.68637
ENSOARG00000018772		Uncharacterized protein	Source:UniProtKB/TrEMBL;Acc:W5QBS0]	17	-5.63486	2.8409	8.93756	5.04608e-07	1.71199e-05	6.54565
ENSOARG00000010301	DEK	DEK proto-oncogene	Source:HGNC Symbol;Acc:HGNC:2768]	20	-3.15589	6.34148	8.93239	5.08015e-07	1.71603e-05	6.67667
ENSOARG00000013637	FTSJ3	FtsJ homolog 3 (E. coli)	Source:HGNC Symbol;Acc:HGNC:17136]	11	4.72138	5.81149	-8.92999	5.09603e-07	1.71704e-05	6.67626
ENSOARG00000013133	MSL1	male-specific lethal 1 homolog (Drosophila)	Source:HGNC Symbol;Acc:HGNC:27905]	11	-4.61262	4.09449	8.92735	5.11356e-07	1.7186e-05	6.65962
ENSOARG00000018506	ACTB	Actin, cytoplasmic 1	Source:UniProtKB/TrEMBL;Acc:W5QAX3]	11	3.66605	10.7299	-8.92083	5.15719e-07	1.72889e-05	6.66503
ENSOARG00000010103	ENTPD4	ectonucleoside triphosphate diphosphohydrolase 4	Source:HGNC Symbol;Acc:HGNC:14573]	2	2.45058	6.75977	-8.91035	5.22815e-07	1.74828e-05	6.648
ENSOARG00000012111	PHF6	PHD finger protein 6	Source:HGNC Symbol;Acc:HGNC:18145]	X	-3.42683	5.45204	8.90276	5.28013e-07	1.76123e-05	6.64253
ENSOARG00000017877		Uncharacterized protein	Source:UniProtKB/TrEMBL;Acc:W5Q8Z2]	4	-11.2137	5.9055	8.87422	5.48071e-07	1.82357e-05	6.60753
ENSOARG00000017884	NXPH4	neurexophilin 4	Source:HGNC Symbol;Acc:HGNC:8078]	3	6.49697	4.31036	-8.86961	5.51387e-07	1.82544e-05	6.5902
ENSOARG00000005064	HERPUD2	HERPUD family member 2	Source:HGNC Symbol;Acc:HGNC:21915]	4	2.57662	6.51	-8.86773	5.52748e-07	1.82544e-05	6.59295
ENSOARG00000009547	SHQ1	SHQ1, H/ACA ribonucleoprotein assembly factor	Source:HGNC Symbol;Acc:HGNC:25543]	19	-4.53039	2.83499	8.869	5.51829e-07	1.82544e-05	6.4716
ENSOARG00000012507	SRPK1	SRSF protein kinase 1	Source:HGNC Symbol;Acc:HGNC:11305]	20	-3.26655	4.63622	8.85629	5.61089e-07	1.8484e-05	6.58367
ENSOARG00000002998	DDX52	DEAD (Asp-Glu-Ala-Asp) box polypeptide 52	Source:HGNC Symbol;Acc:HGNC:20038]	11	2.65171	5.77344	-8.85191	5.64313e-07	1.85443e-05	6.57479
ENSOARG00000010544	DARS	Ovis aries aspartyl-tRNA synthetase (DARS), mRNA.	Source:RefSeq mRNA;Acc:NM_001161887]	2	-3.33853	6.01767	8.84065	5.72706e-07	1.87738e-05	6.55934
ENSOARG00000002042	CYBRD1	cytochrome b reductase 1	Source:HGNC Symbol;Acc:HGNC:20797]	2	-7.11255	3.02628	8.82708	5.82994e-07	1.90641e-05	6.42627
ENSOARG00000015165	ADAM17	ADAM metallopeptidase domain 17	Source:HGNC Symbol;Acc:HGNC:195]	3	3.11089	6.89523	-8.81074	5.95652e-07	1.91004e-05	6.51915
ENSOARG00000000315		Uncharacterized protein	Source:UniProtKB/TrEMBL;Acc:W5NQ69]	13	3.07261	4.68879	-8.81172	5.94882e-07	1.91004e-05	6.52721
ENSOARG00000017515	ORAOV1	oral cancer overexpressed 1	Source:HGNC Symbol;Acc:HGNC:17589]	21	2.96747	5.07414	-8.81155	5.95016e-07	1.91004e-05	6.52697
ENSOARG00000020416	ATP13A3	ATPase type 13A3	Source:HGNC Symbol;Acc:HGNC:24113]	1	-3.23393	5.75728	8.80716	5.98457e-07	1.91004e-05	6.51725
ENSOARG00000012095	STAMBP	STAM binding protein	Source:HGNC Symbol;Acc:HGNC:16950]	3	-3.46986	4.80986	8.81237	5.94374e-07	1.91004e-05	6.52836
ENSOARG00000008569		Uncharacterized protein	Source:UniProtKB/TrEMBL;Acc:W5PFH7]	1	-3.49433	5.75047	8.80826	5.97596e-07	1.91004e-05	6.5189
ENSOARG00000016468	RASSF2	Ras association (RalGDS/AF-6) domain family member 2	Source:HGNC Symbol;Acc:HGNC:9883]	13	-3.54243	5.22574	8.8146	5.92631e-07	1.91004e-05	6.53033
ENSOARG00000005428	TPI1	triosephosphate isomerase 1	Source:HGNC Symbol;Acc:HGNC:12009]	3	-4.32469	6.29719	8.81828	5.89775e-07	1.91004e-05	6.53023
ENSOARG00000020103	BCAT1	Ovis aries branched chain amino-acid transaminase 1, cytosolic (BCAT1), mRNA.	Source:RefSeq mRNA;Acc:NM_001009444]	3	-5.14998	3.20694	8.81627	5.91334e-07	1.91004e-05	6.4524
ENSOARG00000004094	ANO10	anoctamin 10	Source:HGNC Symbol;Acc:HGNC:25519]	19	-5.40574	4.24471	8.81961	5.88748e-07	1.91004e-05	6.52664
ENSOARG00000007309	MON1B	MON1 secretory trafficking family member B	Source:HGNC Symbol;Acc:HGNC:25020]	14	3.85819	4.5334	-8.80322	6.01567e-07	1.91184e-05	6.51482
ENSOARG00000002323		Uncharacterized protein	Source:UniProtKB/TrEMBL;Acc:W5NWB0]	1	2.70862	7.93789	-8.80281	6.01893e-07	1.91184e-05	6.51057
ENSOARG00000000807	PXDC1	PX domain containing 1	Source:HGNC Symbol;Acc:HGNC:21361]	20	5.42372	5.80248	-8.7963	6.07069e-07	1.91912e-05	6.50451
ENSOARG00000003021	ACTB	Ovis aries actin, beta (ACTB), mRNA.	Source:RefSeq mRNA;Acc:NM_001009784]	24	3.64484	10.7064	-8.79698	6.06529e-07	1.91912e-05	6.50526
ENSOARG00000002971	PHACTR4	phosphatase and actin regulator 4	Source:HGNC Symbol;Acc:HGNC:25793]	2	-4.28425	2.89009	8.78843	6.13394e-07	1.92539e-05	6.38607
ENSOARG00000020622	EPS8	epidermal growth factor receptor pathway substrate 8	Source:HGNC Symbol;Acc:HGNC:3420]	3	-6.07071	3.37116	8.78976	6.12325e-07	1.92539e-05	6.43225
ENSOARG00000007683	CXCL16	chemokine (C-X-C motif) ligand 16	Source:HGNC Symbol;Acc:HGNC:16642]	11	-6.72282	4.94516	8.78942	6.12601e-07	1.92539e-05	6.49875
ENSOARG00000017452	MTX2	metaxin 2	Source:HGNC Symbol;Acc:HGNC:7506]	2	-4.22936	2.69541	8.77858	6.21411e-07	1.94597e-05	6.34267
ENSOARG00000012068	MUT	methylmalonyl CoA mutase	Source:HGNC Symbol;Acc:HGNC:7526]	20	-3.07249	4.46979	8.77595	6.23571e-07	1.94815e-05	6.47971
ENSOARG00000014521	WDR37	WD repeat domain 37	Source:HGNC Symbol;Acc:HGNC:31406]	13	4.11445	6.3586	-8.76077	6.36184e-07	1.96898e-05	6.45461
ENSOARG00000013316	PUS1	Ovis aries pseudouridylate synthase 1 (PUS1), mRNA.	Source:RefSeq mRNA;Acc:NM_001163051]	17	3.57605	4.48943	-8.7581	6.38431e-07	1.96898e-05	6.45697
ENSOARG00000006311	HNRNPAB	heterogeneous nuclear ribonucleoprotein A/B	Source:HGNC Symbol;Acc:HGNC:5034]	5	3.46945	8.19007	-8.75719	6.39196e-07	1.96898e-05	6.45147
ENSOARG00000002830	LATS1	large tumor suppressor kinase 1	Source:HGNC Symbol;Acc:HGNC:6514]	8	3.24674	4.92477	-8.76133	6.35714e-07	1.96898e-05	6.46268
ENSOARG00000010527	SIAE	sialic acid acetylesterase	Source:HGNC Symbol;Acc:HGNC:18187]	21	2.70012	5.58328	-8.76167	6.35427e-07	1.96898e-05	6.45901
ENSOARG00000017974	LSM8	LSM8 homolog, U6 small nuclear RNA associated (S. cerevisiae)	Source:HGNC Symbol;Acc:HGNC:20471]	4	-2.71953	5.2137	8.76591	6.31884e-07	1.96898e-05	6.46729
ENSOARG00000009429	FANCM	Fanconi anemia, complementation group M	Source:HGNC Symbol;Acc:HGNC:23168]	18	-4.62874	4.02607	8.75554	6.40595e-07	1.96898e-05	6.44212
ENSOARG00000016852	CFLAR	CASP8 and FADD-like apoptosis regulator	Source:HGNC Symbol;Acc:HGNC:1876]	2	-3.11307	6.13727	8.75144	6.44072e-07	1.9751e-05	6.44245
ENSOARG00000015363	QRICH1	glutamine-rich 1	Source:HGNC Symbol;Acc:HGNC:24713]	19	2.86626	7.09007	-8.74929	6.459e-07	1.97616e-05	6.43923
ENSOARG00000007806	ANKRD37	ankyrin repeat domain 37	Source:HGNC Symbol;Acc:HGNC:29593]	26	-17.9134	1.03263	8.74317	6.51152e-07	1.98766e-05	5.0188
ENSOARG00000000766	ENDOV	endonuclease V	Source:HGNC Symbol;Acc:HGNC:26640]	11	-3.29681	3.67263	8.73615	6.57219e-07	1.99702e-05	6.40345
ENSOARG00000018316	TMCO6	transmembrane and coiled-coil domains 6	Source:HGNC Symbol;Acc:HGNC:28814]	5	-4.52953	4.27937	8.73693	6.56541e-07	1.99702e-05	6.42576
ENSOARG00000010856	WIBG	within bgcn homolog (Drosophila)	Source:HGNC Symbol;Acc:HGNC:30258]	3	3.50072	4.13814	-8.71592	6.75061e-07	2.02825e-05	6.39659
ENSOARG00000004948	BTF3L4	basic transcription factor 3-like 4	Source:HGNC Symbol;Acc:HGNC:30547]	1	3.18889	5.96476	-8.72028	6.71175e-07	2.02825e-05	6.40251
ENSOARG00000006519	HSDL2	hydroxysteroid dehydrogenase like 2	Source:HGNC Symbol;Acc:HGNC:18572]	2	-3.7962	4.61372	8.71883	6.72469e-07	2.02825e-05	6.40741
ENSOARG00000004156	SWT1	SWT1 RNA endoribonuclease homolog (S. cerevisiae)	Source:HGNC Symbol;Acc:HGNC:16785]	12	-4.39398	2.50173	8.71586	6.7512e-07	2.02825e-05	6.23268
ENSOARG00000020076				20	-6.60358	3.36921	8.7203	6.71156e-07	2.02825e-05	6.34691
ENSOARG00000002379	GINS4	GINS complex subunit 4 (Sld5 homolog)	Source:HGNC Symbol;Acc:HGNC:28226]	26	5.34137	2.76738	-8.71328	6.77428e-07	2.0306e-05	6.26612
ENSOARG00000014938	ZNF395	zinc finger protein 395	Source:HGNC Symbol;Acc:HGNC:18737]	2	-4.69838	3.91072	8.70595	6.84043e-07	2.04583e-05	6.37339
ENSOARG00000012899	TMPO	thymopoietin	Source:HGNC Symbol;Acc:HGNC:11875]	3	-3.21696	4.97354	8.69837	6.90954e-07	2.05725e-05	6.38102
ENSOARG00000020412	PHGDH	phosphoglycerate dehydrogenase	Source:HGNC Symbol;Acc:HGNC:8923]	1	-4.56812	3.49788	8.69913	6.9026e-07	2.05725e-05	6.34037
ENSOARG00000014695	YIPF6	Yip1 domain family, member 6	Source:HGNC Symbol;Acc:HGNC:28304]	X	-4.00125	3.66797	8.69001	6.98673e-07	2.07559e-05	6.34419
ENSOARG00000016610	HLA-DRA	major histocompatibility complex, class II, DR alpha	Source:HGNC Symbol;Acc:HGNC:4947]	20	3.26137	10.7149	-8.68053	7.07521e-07	2.08903e-05	6.35336
ENSOARG00000019554	ARID2	AT rich interactive domain 2 (ARID, RFX-like)	Source:HGNC Symbol;Acc:HGNC:18037]	3	-3.27074	5.32965	8.6811	7.0699e-07	2.08903e-05	6.35612
ENSOARG00000019550		Uncharacterized protein	Source:UniProtKB/TrEMBL;Acc:W5QE51]	7	-4.60762	3.02438	8.68012	7.07905e-07	2.08903e-05	6.27095
ENSOARG00000008681	SPSB1	splA/ryanodine receptor domain and SOCS box containing 1	Source:HGNC Symbol;Acc:HGNC:30628]	12	4.77172	4.49237	-8.67549	7.12279e-07	2.09728e-05	6.35
ENSOARG00000017242	ACVRL1	activin A receptor type II-like 1	Source:HGNC Symbol;Acc:HGNC:175]	3	-6.99128	1.71595	8.66547	7.21835e-07	2.12073e-05	5.9014
ENSOARG00000006990	CCNJ	cyclin J	Source:HGNC Symbol;Acc:HGNC:23434]	22	5.74431	1.79841	-8.65829	7.28772e-07	2.1317e-05	5.9563
ENSOARG00000003333	ZBTB7B	zinc finger and BTB domain containing 7B	Source:HGNC Symbol;Acc:HGNC:18668]	1	-3.66907	4.30482	8.65934	7.27747e-07	2.1317e-05	6.32735
ENSOARG00000018434	NRP2	neuropilin 2	Source:HGNC Symbol;Acc:HGNC:8005]	2	-5.79404	1.41613	8.64263	7.44133e-07	2.17186e-05	5.79558
ENSOARG00000011672		Uncharacterized protein	Source:UniProtKB/TrEMBL;Acc:W5PPZ0]	1	4.83402	6.2927	-8.64099	7.45766e-07	2.17186e-05	6.29782
ENSOARG00000014706	LSM14B	LSM14B, SCD6 homolog B (S. cerevisiae)	Source:HGNC Symbol;Acc:HGNC:15887]	13	3.14626	6.57077	-8.63824	7.48503e-07	2.17507e-05	6.29281
ENSOARG00000018416	CAMK2D	calcium/calmodulin-dependent protein kinase II delta	Source:HGNC Symbol;Acc:HGNC:1462]	6	4.81112	5.34893	-8.62539	7.61443e-07	2.1844e-05	6.28384
ENSOARG00000011758	GRWD1	glutamate-rich WD repeat containing 1	Source:HGNC Symbol;Acc:HGNC:21270]	14	4.69178	4.69707	-8.62897	7.57814e-07	2.1844e-05	6.29131
ENSOARG00000014077	38777	membrane-associated ring finger (C3HC4) 6, E3 ubiquitin protein ligase	Source:HGNC Symbol;Acc:HGNC:30550]	16	3.48642	7.97064	-8.62519	7.61649e-07	2.1844e-05	6.27774
ENSOARG00000011408	FRY	furry homolog (Drosophila)	Source:HGNC Symbol;Acc:HGNC:20367]	10	3.45677	4.81983	-8.63106	7.55703e-07	2.1844e-05	6.29395
ENSOARG00000011407	USP38	ubiquitin specific peptidase 38	Source:HGNC Symbol;Acc:HGNC:20067]	17	3.03393	5.6621	-8.62367	7.63201e-07	2.1844e-05	6.27763
ENSOARG00000000302	POLR2C	polymerase (RNA) II (DNA directed) polypeptide C, 33kDa	Source:HGNC Symbol;Acc:HGNC:9189]	14	2.7847	6.3676	-8.63271	7.54045e-07	2.1844e-05	6.28546
ENSOARG00000018406	DPH5	diphthamide biosynthesis 5	Source:HGNC Symbol;Acc:HGNC:24270]	1	-4.34628	3.03179	8.62826	7.5853e-07	2.1844e-05	6.21106
ENSOARG00000010052				4	-3.30745	6.22284	8.61509	7.7199e-07	2.20481e-05	6.26286
ENSOARG00000016243	MAP3K11	mitogen-activated protein kinase kinase kinase 11	Source:HGNC Symbol;Acc:HGNC:6850]	21	4.98928	5.60757	-8.60801	7.79332e-07	2.22032e-05	6.25882
ENSOARG00000020063				20	-7.69159	5.11373	8.60665	7.80756e-07	2.22032e-05	6.26206
ENSOARG00000019904	NDUFB4	NADH dehydrogenase (ubiquinone) 1 beta subcomplex, 4, 15kDa	Source:HGNC Symbol;Acc:HGNC:7699]	1	-3.01732	5.06454	8.60246	7.85135e-07	2.22801e-05	6.25506
ENSOARG00000001964	NUP210	nucleoporin 210kDa	Source:HGNC Symbol;Acc:HGNC:30052]	19	4.04683	5.50779	-8.59023	7.98096e-07	2.25997e-05	6.23539
ENSOARG00000018111	RAB9A	Ovis aries RAB9A, member RAS oncogene family (RAB9A), mRNA.	Source:RefSeq mRNA;Acc:NM_001161870]	X	-6.79036	3.41205	8.58554	8.0313e-07	2.2694e-05	6.18303
ENSOARG00000005628	EIF5	eukaryotic translation initiation factor 5	Source:HGNC Symbol;Acc:HGNC:3299]	18	3.80262	8.3385	-8.57659	8.12812e-07	2.28222e-05	6.21396
ENSOARG00000017247	METTL14	methyltransferase like 14	Source:HGNC Symbol;Acc:HGNC:29330]	6	-4.33099	3.62998	8.57794	8.1135e-07	2.28222e-05	6.19911
ENSOARG00000005865	CD2BP2	CD2 (cytoplasmic tail) binding protein 2	Source:HGNC Symbol;Acc:HGNC:1656]	24	-2.65696	6.05072	8.57224	8.17567e-07	2.29074e-05	6.20686
ENSOARG00000009833	MITF	Uncharacterized protein	Source:UniProtKB/TrEMBL;Acc:W5PJC4]	19	-8.32146	2.29865	8.5706	8.19365e-07	2.29095e-05	5.95923
ENSOARG00000004743	ATP6AP1	ATPase, H+ transporting, lysosomal accessory protein 1	Source:HGNC Symbol;Acc:HGNC:868]	X	-5.11476	5.8052	8.5612	8.29771e-07	2.31034e-05	6.19537
ENSOARG00000014199	ADFP	Ovis aries perilipin 2 (PLIN2), mRNA.	Source:RefSeq mRNA;Acc:NM_001104932]	2	-5.92165	5.24486	8.56267	8.28137e-07	2.31034e-05	6.20284
ENSOARG00000006219	TRAPPC8	trafficking protein particle complex 8	Source:HGNC Symbol;Acc:HGNC:29169]	23	-3.68668	5.79913	8.55258	8.3943e-07	2.33043e-05	6.18281
ENSOARG00000006212	CRABP2	cellular retinoic acid binding protein 2	Source:HGNC Symbol;Acc:HGNC:2339]	1	-8.67226	2.55036	8.55164	8.40488e-07	2.33043e-05	5.9788
ENSOARG00000002195	RNMT	RNA (guanine-7-) methyltransferase	Source:HGNC Symbol;Acc:HGNC:10075]	23	3.25661	7.03619	-8.54101	8.52586e-07	2.35906e-05	6.16393
ENSOARG00000006023	ERBB2IP	erbb2 interacting protein	Source:HGNC Symbol;Acc:HGNC:15842]	16	-4.08089	6.80954	8.53444	8.60147e-07	2.3707e-05	6.15505
ENSOARG00000004545	ME2	malic enzyme 2, NAD(+)-dependent, mitochondrial	Source:HGNC Symbol;Acc:HGNC:6984]	23	-4.1799	4.485	8.53426	8.60356e-07	2.3707e-05	6.16722
ENSOARG00000003763	AGO2	argonaute RISC catalytic component 2	Source:HGNC Symbol;Acc:HGNC:3263]	9	5.22239	7.45231	-8.529	8.66467e-07	2.37769e-05	6.14893
ENSOARG00000011376	RNMTL1	RNA methyltransferase like 1	Source:HGNC Symbol;Acc:HGNC:18485]	11	4.97419	2.55416	-8.52973	8.65623e-07	2.37769e-05	6.01441
ENSOARG00000021076	SAMD4A	sterile alpha motif domain containing 4A	Source:HGNC Symbol;Acc:HGNC:23023]	7	-10.0193	-0.380422	8.52648	8.69415e-07	2.38087e-05	4.37387
ENSOARG00000015431	ODC1	Uncharacterized protein	Source:UniProtKB/TrEMBL;Acc:W5Q1G7]	3	4.93424	8.54839	-8.52212	8.74535e-07	2.3827e-05	6.14169
ENSOARG00000014551	SH2B2	SH2B adaptor protein 2	Source:HGNC Symbol;Acc:HGNC:17381]	24	4.26619	5.35211	-8.52377	8.72587e-07	2.3827e-05	6.14926
ENSOARG00000018879		Uncharacterized protein	Source:UniProtKB/TrEMBL;Acc:W5QC30]	3	3.51384	5.90656	-8.52134	8.75451e-07	2.3827e-05	6.14031
ENSOARG00000008988	PLCG2	phospholipase C, gamma 2 (phosphatidylinositol-specific)	Source:HGNC Symbol;Acc:HGNC:9066]	14	3.9846	7.28368	-8.51764	8.79826e-07	2.38972e-05	6.13337
ENSOARG00000001915		Uncharacterized protein	Source:UniProtKB/TrEMBL;Acc:W5NV18]	9	8.30645	0.802363	-8.51203	8.86499e-07	2.39319e-05	5.27253
ENSOARG00000018480	FAM83G	family with sequence similarity 83, member G	Source:HGNC Symbol;Acc:HGNC:32554]	11	4.83373	4.74425	-8.51269	8.85714e-07	2.39319e-05	6.13923
ENSOARG00000016347	RAP1GDS1	RAP1, GTP-GDP dissociation stimulator 1	Source:HGNC Symbol;Acc:HGNC:9859]	6	-3.2131	4.11989	8.51292	8.8544e-07	2.39319e-05	6.13563
ENSOARG00000009983	FOSB	FBJ murine osteosarcoma viral oncogene homolog B	Source:HGNC Symbol;Acc:HGNC:3797]	14	8.42411	6.00213	-8.50788	8.9147e-07	2.40174e-05	6.12712
ENSOARG00000006518	GPM6A	glycoprotein M6A	Source:HGNC Symbol;Acc:HGNC:4460]	26	-6.17224	1.66047	8.50018	9.00773e-07	2.4219e-05	5.72542
ENSOARG00000001785	TM2D2	TM2 domain containing 2	Source:HGNC Symbol;Acc:HGNC:24127]	26	-4.4175	3.95594	8.49838	9.02964e-07	2.42289e-05	6.11172
ENSOARG00000017221	RBL1	retinoblastoma-like 1	Source:HGNC Symbol;Acc:HGNC:9893]	13	-5.18171	4.24888	8.49538	9.06631e-07	2.42784e-05	6.11359
ENSOARG00000012221	PDS5A	PDS5 cohesin associated factor A	Source:HGNC Symbol;Acc:HGNC:29088]	6	-2.99544	6.50339	8.49379	9.08584e-07	2.42818e-05	6.10039
ENSOARG00000011436	MGAT5	mannosyl (alpha-1,6-)-glycoprotein beta-1,6-N-acetyl-glucosaminyltransferase	Source:HGNC Symbol;Acc:HGNC:7049]	2	-5.02203	6.46507	8.49171	9.11131e-07	2.43011e-05	6.0988
ENSOARG00000020204	CMAS	cytidine monophosphate N-acetylneuraminic acid synthetase	Source:HGNC Symbol;Acc:HGNC:18290]	3	-3.55707	4.47202	8.48731	9.16564e-07	2.43971e-05	6.10572
ENSOARG00000010953	XDH	xanthine dehydrogenase	Source:HGNC Symbol;Acc:HGNC:12805]	3	-14.7542	0.693331	8.48076	9.24709e-07	2.45648e-05	4.79297
ENSOARG00000005383	ZNF383	zinc finger protein 383	Source:HGNC Symbol;Acc:HGNC:18609]	14	-6.05943	1.61443	8.47672	9.29776e-07	2.46012e-05	5.69289
ENSOARG00000005927	MRPS12	mitochondrial ribosomal protein S12	Source:HGNC Symbol;Acc:HGNC:10380]	14	-6.31724	2.74648	8.47725	9.29112e-07	2.46012e-05	5.97281
ENSOARG00000010663	SLC30A6	solute carrier family 30 (zinc transporter), member 6	Source:HGNC Symbol;Acc:HGNC:19305]	3	-4.1203	2.9473	8.47429	9.32837e-07	2.46332e-05	6.01162
ENSOARG00000017194	RAB22A	RAB22A, member RAS oncogene family	Source:HGNC Symbol;Acc:HGNC:9764]	13	4.15078	4.05601	-8.47099	9.37004e-07	2.46942e-05	6.07863
ENSOARG00000000852	OARD1	O-acyl-ADP-ribose deacylase 1	Source:HGNC Symbol;Acc:HGNC:21257]	20	-3.49368	4.11076	8.45967	9.51471e-07	2.50259e-05	6.06589
ENSOARG00000013303	VLDLR	very low density lipoprotein receptor	Source:HGNC Symbol;Acc:HGNC:12698]	2	-15.2284	-1.37588	8.45369	9.59195e-07	2.51793e-05	3.39108
ENSOARG00000013057		Uncharacterized protein	Source:UniProtKB/TrEMBL;Acc:W5PU57]	24	2.76113	6.03812	-8.44788	9.66778e-07	2.53284e-05	6.04032
ENSOARG00000006925	FAM78A	family with sequence similarity 78, member A	Source:HGNC Symbol;Acc:HGNC:25465]	3	3.64821	5.38606	-8.44318	9.72956e-07	2.53407e-05	6.04133
ENSOARG00000020579	UBR1	ubiquitin protein ligase E3 component n-recognin 1	Source:HGNC Symbol;Acc:HGNC:16808]	7	-3.1344	5.47336	8.44523	9.70252e-07	2.53407e-05	6.0422
ENSOARG00000020864	LOH12CR1	loss of heterozygosity, 12, chromosomal region 1	Source:HGNC Symbol;Acc:HGNC:17950]	3	-6.2408	2.06358	8.44368	9.72292e-07	2.53407e-05	5.7882
ENSOARG00000014476	EIF4A1	eukaryotic translation initiation factor 4A1	Source:HGNC Symbol;Acc:HGNC:3282]	11	2.79964	10.3929	-8.43918	9.78251e-07	2.54288e-05	6.03281
ENSOARG00000015859	KCTD10	potassium channel tetramerization domain containing 10	Source:HGNC Symbol;Acc:HGNC:23236]	17	4.26452	6.35347	-8.43606	9.8239e-07	2.5432e-05	6.02416
ENSOARG00000010061	PATZ1	POZ (BTB) and AT hook containing zinc finger 1	Source:HGNC Symbol;Acc:HGNC:13071]	17	4.10008	4.48813	-8.43478	9.84106e-07	2.5432e-05	6.03655
ENSOARG00000008732	ZCCHC6	zinc finger, CCHC domain containing 6	Source:HGNC Symbol;Acc:HGNC:25817]	2	-2.81941	6.85813	8.4351	9.8368e-07	2.5432e-05	6.02152
ENSOARG00000010066	STRN	striatin, calmodulin binding protein	Source:HGNC Symbol;Acc:HGNC:11424]	3	-3.95337	3.94887	8.42903	9.91812e-07	2.55485e-05	6.022
ENSOARG00000015021	RAD50	RAD50 homolog (S. cerevisiae)	Source:HGNC Symbol;Acc:HGNC:9816]	5	-5.06653	3.93635	8.42855	9.92456e-07	2.55485e-05	6.01943
ENSOARG00000009963		Serum amyloid A protein	Source:UniProtKB/TrEMBL;Acc:W5PJR5]	21	-15.9021	2.65229	8.42516	9.97031e-07	2.56168e-05	5.64644
ENSOARG00000020630				2	-3.25211	6.5886	8.41918	1.00516e-06	2.57758e-05	6.00002
ENSOARG00000002828	TAF12	TAF12 RNA polymerase II, TATA box binding protein (TBP)-associated factor, 20kDa	Source:HGNC Symbol;Acc:HGNC:11545]	2	-5.60984	3.69139	8.41754	1.0074e-06	2.57836e-05	5.99446
ENSOARG00000012235	SLC9A3R1	solute carrier family 9, subfamily A (NHE3, cation proton antiporter 3), member 3 regulator 1	Source:HGNC Symbol;Acc:HGNC:11075]	11	4.12993	6.03566	-8.41429	1.01187e-06	2.58482e-05	5.99623
ENSOARG00000007364	ZMYND15	zinc finger, MYND-type containing 15	Source:HGNC Symbol;Acc:HGNC:20997]	11	-6.60169	3.34994	8.4057	1.02374e-06	2.61015e-05	5.95185
ENSOARG00000005884	SAR1A	secretion associated, Ras related GTPase 1A	Source:HGNC Symbol;Acc:HGNC:10534]	25	2.52968	7.31781	-8.40422	1.0258e-06	2.6104e-05	5.98088
ENSOARG00000015920	PAK1IP1	PAK1 interacting protein 1	Source:HGNC Symbol;Acc:HGNC:20882]	20	3.60002	6.14038	-8.39717	1.03569e-06	2.61061e-05	5.97178
ENSOARG00000017945	PWP1	PWP1 homolog (S. cerevisiae)	Source:HGNC Symbol;Acc:HGNC:17015]	3	3.28743	6.51159	-8.40003	1.03167e-06	2.61061e-05	5.97428
ENSOARG00000017137	ZFY	Uncharacterized protein	Source:UniProtKB/TrEMBL;Acc:W5Q6P9]	X	2.67552	6.08974	-8.40248	1.02824e-06	2.61061e-05	5.97863
ENSOARG00000015518	VPS35	vacuolar protein sorting 35 homolog (S. cerevisiae)	Source:HGNC Symbol;Acc:HGNC:13487]	14	-2.71864	5.78833	8.39735	1.03544e-06	2.61061e-05	5.97413
ENSOARG00000018170	ABCB7	ATP-binding cassette, sub-family B (MDR/TAP), member 7	Source:HGNC Symbol;Acc:HGNC:48]	X	-3.19878	4.48793	8.398	1.03452e-06	2.61061e-05	5.98797
ENSOARG00000005286	AARS	alanyl-tRNA synthetase	Source:HGNC Symbol;Acc:HGNC:20]	14	-3.37246	7.21069	8.39325	1.04124e-06	2.61962e-05	5.96587
ENSOARG00000009172	CD3D	Ovis aries CD3d molecule, delta (CD3-TCR complex) (CD3D), mRNA.	Source:RefSeq mRNA;Acc:NM_001009382]	15	-4.46715	6.7991	8.3911	1.04429e-06	2.62234e-05	5.96254
ENSOARG00000000965	ZNF511	zinc finger protein 511	Source:HGNC Symbol;Acc:HGNC:28445]	22	3.61642	3.18076	-8.38658	1.05074e-06	2.63358e-05	5.92473
ENSOARG00000015597	AAR2	AAR2 splicing factor homolog (S. cerevisiae)	Source:HGNC Symbol;Acc:HGNC:15886]	13	3.22725	3.87589	-8.38244	1.05668e-06	2.64348e-05	5.96016
ENSOARG00000012092	ZNF79	zinc finger protein 79	Source:HGNC Symbol;Acc:HGNC:13153]	3	3.70599	4.43394	-8.38006	1.06011e-06	2.64708e-05	5.96413
ENSOARG00000009803	TWISTNB	TWIST neighbor	Source:HGNC Symbol;Acc:HGNC:18027]	4	3.773	5.81458	-8.36701	1.07914e-06	2.67953e-05	5.93358
ENSOARG00000011580	KXD1	KxDL motif containing 1	Source:HGNC Symbol;Acc:HGNC:28420]	5	-4.51801	4.21976	8.36932	1.07575e-06	2.67953e-05	5.94828
ENSOARG00000013335	IRF3	Uncharacterized protein	Source:UniProtKB/TrEMBL;Acc:W5PV11]	14	-7.07321	3.39884	8.36748	1.07845e-06	2.67953e-05	5.90457
ENSOARG00000010836	DNM1	dynamin 1	Source:HGNC Symbol;Acc:HGNC:2972]	3	4.48014	3.29695	-8.35422	1.09815e-06	2.72164e-05	5.8917
ENSOARG00000006228	LPHN1	latrophilin 1	Source:HGNC Symbol;Acc:HGNC:20973]	5	3.69958	3.40921	-8.34509	1.11193e-06	2.74876e-05	5.88982
ENSOARG00000006012	FOXO1	forkhead box O1	Source:HGNC Symbol;Acc:HGNC:3819]	10	2.89563	5.72198	-8.34424	1.11322e-06	2.74876e-05	5.90323
ENSOARG00000017222	FGF2	Ovis aries fibroblast growth factor 2 (basic) (FGF2), mRNA.	Source:RefSeq mRNA;Acc:NM_001009769]	17	-3.23626	3.22994	8.34048	1.11896e-06	2.75273e-05	5.87278
ENSOARG00000017860	TRGV10	T cell receptor gamma variable 10 (non-functional)	Source:HGNC Symbol;Acc:HGNC:12285]	4	-8.21996	3.66825	8.34063	1.11873e-06	2.75273e-05	5.88167
ENSOARG00000005179	PPP1R9B	protein phosphatase 1, regulatory subunit 9B	Source:HGNC Symbol;Acc:HGNC:9298]	11	-2.8744	6.69651	8.33592	1.12595e-06	2.76482e-05	5.88747
ENSOARG00000012455	RALGPS1	Ral GEF with PH domain and SH3 binding motif 1	Source:HGNC Symbol;Acc:HGNC:16851]	3	7.32602	0.993441	-8.31604	1.15702e-06	2.83588e-05	5.22064
ENSOARG00000005337	VPS26A	vacuolar protein sorting 26 homolog A (S. pombe)	Source:HGNC Symbol;Acc:HGNC:12711]	25	-2.56993	5.78315	8.31194	1.16353e-06	2.84658e-05	5.85848
ENSOARG00000003764	AGPAT2	1-acylglycerol-3-phosphate O-acyltransferase 2	Source:HGNC Symbol;Acc:HGNC:325]	3	5.89809	4.50007	-8.30625	1.17264e-06	2.86361e-05	5.86584
ENSOARG00000012175	DGUOK	deoxyguanosine kinase	Source:HGNC Symbol;Acc:HGNC:2858]	3	-3.39384	3.93352	8.30072	1.18157e-06	2.87486e-05	5.85414
ENSOARG00000004952	NUDT9	Ovis aries nudix (nucleoside diphosphate linked moiety X)-type motif 9 (NUDT9), nuclear gene encoding mitochondrial protein, mRNA.	Source:RefSeq mRNA;Acc:NM_001202421]	6	-3.46166	5.03473	8.30157	1.1802e-06	2.87486e-05	5.85478
ENSOARG00000006128	RNF125	ring finger protein 125, E3 ubiquitin protein ligase	Source:HGNC Symbol;Acc:HGNC:21150]	23	4.91436	2.91284	-8.29872	1.18483e-06	2.87753e-05	5.78533
ENSOARG00000017748	SLC3A2	solute carrier family 3 (amino acid transporter heavy chain), member 2	Source:HGNC Symbol;Acc:HGNC:11026]	21	2.58203	7.9068	-8.29413	1.1923e-06	2.87992e-05	5.83307
ENSOARG00000001366	CENPI	centromere protein I	Source:HGNC Symbol;Acc:HGNC:3968]	X	-4.115	3.04356	8.29475	1.1913e-06	2.87992e-05	5.79643
ENSOARG00000020875	LRP6	low density lipoprotein receptor-related protein 6	Source:HGNC Symbol;Acc:HGNC:6698]	3	-4.8192	2.21343	8.29487	1.19109e-06	2.87992e-05	5.66596
ENSOARG00000015533	CCDC53	coiled-coil domain containing 53	Source:HGNC Symbol;Acc:HGNC:24256]	3	-4.8023	3.35867	8.29123	1.19707e-06	2.88619e-05	5.8149
ENSOARG00000008874	MTMR1	myotubularin related protein 1	Source:HGNC Symbol;Acc:HGNC:7449]	X	3.34039	5.71438	-8.27956	1.21641e-06	2.9233e-05	5.81579
ENSOARG00000016335	KEAP1	kelch-like ECH-associated protein 1	Source:HGNC Symbol;Acc:HGNC:23177]	5	2.93191	6.03747	-8.27929	1.21685e-06	2.9233e-05	5.81186
ENSOARG00000015323	GNA13	guanine nucleotide binding protein (G protein), alpha 13	Source:HGNC Symbol;Acc:HGNC:4381]	11	3.59159	6.64872	-8.27707	1.22058e-06	2.92697e-05	5.80699
ENSOARG00000018154	CNP	2',3'-cyclic nucleotide 3' phosphodiesterase	Source:HGNC Symbol;Acc:HGNC:2158]	11	2.96152	6.77271	-8.27069	1.23133e-06	2.94215e-05	5.79817
ENSOARG00000000197	CCDC132	coiled-coil domain containing 132	Source:HGNC Symbol;Acc:HGNC:25956]	4	-3.32003	3.72897	8.27154	1.2299e-06	2.94215e-05	5.81036
ENSOARG00000004245	ARID1B	AT rich interactive domain 1B (SWI1-like)	Source:HGNC Symbol;Acc:HGNC:18040]	8	2.98868	6.06796	-8.26663	1.23823e-06	2.95333e-05	5.79438
ENSOARG00000017999	CHIC1	cysteine-rich hydrophobic domain 1	Source:HGNC Symbol;Acc:HGNC:1934]	X	-6.17863	1.34658	8.26525	1.24058e-06	2.95365e-05	5.3366
ENSOARG00000008556	RCBTB1	regulator of chromosome condensation (RCC1) and BTB (POZ) domain containing protein 1	Source:HGNC Symbol;Acc:HGNC:18243]	10	-3.97189	4.60218	8.26015	1.24932e-06	2.96385e-05	5.80367
ENSOARG00000002070	RGL1	ral guanine nucleotide dissociation stimulator-like 1	Source:HGNC Symbol;Acc:HGNC:30281]	12	-12.1943	0.744393	8.26078	1.24824e-06	2.96385e-05	4.76989
ENSOARG00000005919	NDUFAF6	NADH dehydrogenase (ubiquinone) complex I, assembly factor 6	Source:HGNC Symbol;Acc:HGNC:28625]	9	4.19527	3.30218	-8.25487	1.25843e-06	2.96995e-05	5.76645
ENSOARG00000017375	HIPK3	homeodomain interacting protein kinase 3	Source:HGNC Symbol;Acc:HGNC:4915]	15	2.84213	6.80772	-8.25514	1.25797e-06	2.96995e-05	5.77682
ENSOARG00000002352	SUDS3	suppressor of defective silencing 3 homolog (S. cerevisiae)	Source:HGNC Symbol;Acc:HGNC:29545]	17	-3.94119	3.88243	8.25478	1.25859e-06	2.96995e-05	5.79167
ENSOARG00000020649	KLHL6	kelch-like family member 6	Source:HGNC Symbol;Acc:HGNC:18653]	1	-5.98737	3.89712	8.24765	1.271e-06	2.99395e-05	5.77927
ENSOARG00000011199	ATG5	Uncharacterized protein	Source:UniProtKB/TrEMBL;Acc:W5PNH4]	8	-3.55281	4.28698	8.24403	1.27737e-06	3.00361e-05	5.78258
ENSOARG00000012677	USP12	ubiquitin specific peptidase 12	Source:HGNC Symbol;Acc:HGNC:20485]	10	4.37976	5.38995	-8.23226	1.29826e-06	3.04737e-05	5.75627
ENSOARG00000014134	MRRF	mitochondrial ribosome recycling factor	Source:HGNC Symbol;Acc:HGNC:7234]	3	-4.37854	3.20712	8.21088	1.33718e-06	3.13319e-05	5.70071
ENSOARG00000014321	TOP2A	topoisomerase (DNA) II alpha 170kDa	Source:HGNC Symbol;Acc:HGNC:11989]	11	-3.07569	6.12399	8.20252	1.35272e-06	3.16403e-05	5.70603
ENSOARG00000001140		Uncharacterized protein	Source:UniProtKB/TrEMBL;Acc:W5NSP0]	4	-4.2453	6.30279	8.18907	1.37813e-06	3.21782e-05	5.68786
ENSOARG00000003346	CYP1A2	cytochrome P450, family 1, subfamily A, polypeptide 2	Source:HGNC Symbol;Acc:HGNC:2596]	18	-19.2368	0.259459	8.18366	1.3885e-06	3.23635e-05	3.86212
ENSOARG00000018260	ST8SIA4	ST8 alpha-N-acetyl-neuraminide alpha-2,8-sialyltransferase 4	Source:HGNC Symbol;Acc:HGNC:10871]	5	-3.31472	4.71739	8.18029	1.39499e-06	3.2458e-05	5.69419
ENSOARG00000002698	YTHDF2	YTH N(6)-methyladenosine RNA binding protein 2	Source:HGNC Symbol;Acc:HGNC:31675]	2	2.55673	6.5199	-8.17719	1.40101e-06	3.2541e-05	5.66965
ENSOARG00000007574	PARN	poly(A)-specific ribonuclease	Source:HGNC Symbol;Acc:HGNC:8609]	24	-2.7597	4.96801	8.17365	1.40789e-06	3.26439e-05	5.68137
ENSOARG00000002966		Uncharacterized protein	Source:UniProtKB/TrEMBL;Acc:W5NYA7]	17	4.22569	6.08243	-8.1706	1.41387e-06	3.26686e-05	5.6633
ENSOARG00000010528	SLCO3A1	solute carrier organic anion transporter family, member 3A1	Source:HGNC Symbol;Acc:HGNC:10952]	18	-8.32167	4.52986	8.17109	1.41291e-06	3.26686e-05	5.68449
ENSOARG00000000971	ANKRD12	ankyrin repeat domain 12	Source:HGNC Symbol;Acc:HGNC:29135]	23	3.75979	9.25607	-8.16878	1.41744e-06	3.26945e-05	5.66372
ENSOARG00000013095		Uncharacterized protein	Source:UniProtKB/TrEMBL;Acc:W5PU93]	4	3.09541	6.14696	-8.16582	1.42327e-06	3.27721e-05	5.65579
ENSOARG00000003038	CCSAP	centriole, cilia and spindle-associated protein	Source:HGNC Symbol;Acc:HGNC:29578]	25	5.43072	3.05378	-8.16307	1.42871e-06	3.28407e-05	5.62098
ENSOARG00000012685	COX15	cytochrome c oxidase assembly homolog 15 (yeast)	Source:HGNC Symbol;Acc:HGNC:2263]	22	-4.81832	2.48219	8.16164	1.43155e-06	3.28491e-05	5.55354
ENSOARG00000020020	TUBA4A	Ovis aries tubulin, alpha 4a (TUBA4A), mRNA.	Source:RefSeq mRNA;Acc:NM_001163055]	2	4.07642	7.95325	-8.15663	1.44154e-06	3.29648e-05	5.64441
ENSOARG00000011833	CREB3	cAMP responsive element binding protein 3	Source:HGNC Symbol;Acc:HGNC:2347]	2	-3.54195	4.762	8.15769	1.43941e-06	3.29648e-05	5.663
ENSOARG00000001812	BATF	basic leucine zipper transcription factor, ATF-like	Source:HGNC Symbol;Acc:HGNC:958]	7	-6.1855	2.67142	8.14795	1.45904e-06	3.33075e-05	5.55153
ENSOARG00000009711	CERS3	ceramide synthase 3	Source:HGNC Symbol;Acc:HGNC:23752]	18	-5.05409	2.08822	8.14524	1.46452e-06	3.33756e-05	5.45755
ENSOARG00000002995		Uncharacterized protein	Source:UniProtKB/TrEMBL;Acc:W5NYD7]	JH922623.1	5.69034	1.43267	-8.14171	1.47173e-06	3.34825e-05	5.25074
ENSOARG00000017901	TMEM199	transmembrane protein 199	Source:HGNC Symbol;Acc:HGNC:18085]	11	-4.52536	2.49002	8.13949	1.47629e-06	3.3529e-05	5.52815
ENSOARG00000018166	ADIPOR1	adiponectin receptor 1	Source:HGNC Symbol;Acc:HGNC:24040]	12	3.99916	6.25473	-8.13313	1.48941e-06	3.37693e-05	5.61031
ENSOARG00000004051	DVL1	dishevelled segment polarity protein 1	Source:HGNC Symbol;Acc:HGNC:3084]	12	3.6725	4.40136	-8.12858	1.49886e-06	3.38681e-05	5.62675
ENSOARG00000017586	CNPY4	canopy FGF signaling regulator 4	Source:HGNC Symbol;Acc:HGNC:28631]	24	-5.6394	2.77896	8.12876	1.49849e-06	3.38681e-05	5.54477
ENSOARG00000011276	GTF2I	general transcription factor IIi	Source:HGNC Symbol;Acc:HGNC:4659]	24	-4.49981	5.74617	8.12488	1.50661e-06	3.39855e-05	5.60429
ENSOARG00000014088	C6orf89	chromosome 6 open reading frame 89	Source:HGNC Symbol;Acc:HGNC:21114]	20	-3.04187	4.78943	8.12187	1.51293e-06	3.40705e-05	5.61336
ENSOARG00000021187	SUSD6	sushi domain containing 6	Source:HGNC Symbol;Acc:HGNC:19956]	7	3.67509	5.36842	-8.11904	1.51891e-06	3.41473e-05	5.6006
ENSOARG00000013181	TMEM120B	transmembrane protein 120B	Source:HGNC Symbol;Acc:HGNC:32008]	17	5.89469	2.84547	-8.11765	1.52185e-06	3.41557e-05	5.53973
ENSOARG00000006516	CNTD2	cyclin N-terminal domain containing 2	Source:HGNC Symbol;Acc:HGNC:25805]	14	5.75625	1.82171	-8.11639	1.52454e-06	3.41583e-05	5.34867
ENSOARG00000004037	ADNP2	ADNP homeobox 2	Source:HGNC Symbol;Acc:HGNC:23803]	23	4.11507	6.01496	-8.11228	1.53328e-06	3.42716e-05	5.58318
ENSOARG00000005744	DDX39A	DEAD (Asp-Glu-Ala-Asp) box polypeptide 39A	Source:HGNC Symbol;Acc:HGNC:17821]	5	2.51635	7.1986	-8.10995	1.53827e-06	3.42716e-05	5.57738
ENSOARG00000011331	PREP	prolyl endopeptidase	Source:HGNC Symbol;Acc:HGNC:9358]	8	-3.75927	4.18171	8.10919	1.53989e-06	3.42716e-05	5.60077
ENSOARG00000008915	HNRNPLL	heterogeneous nuclear ribonucleoprotein L-like	Source:HGNC Symbol;Acc:HGNC:25127]	3	-6.13007	4.26757	8.10932	1.53961e-06	3.42716e-05	5.60065
ENSOARG00000000063	CCL22	chemokine (C-C motif) ligand 22	Source:HGNC Symbol;Acc:HGNC:10621]	14	-8.15559	2.06207	8.10729	1.54398e-06	3.43052e-05	5.34315
ENSOARG00000010137	ASGR1	asialoglycoprotein receptor 1	Source:HGNC Symbol;Acc:HGNC:742]	11	-11.9902	-0.223404	8.10053	1.55861e-06	3.45726e-05	3.95533
ENSOARG00000007931	GTPBP2	GTP binding protein 2	Source:HGNC Symbol;Acc:HGNC:4670]	20	-3.34365	4.60528	8.09418	1.57248e-06	3.48221e-05	5.57799
ENSOARG00000015045	DDX5	DEAD (Asp-Glu-Ala-Asp) box helicase 5	Source:HGNC Symbol;Acc:HGNC:2746]	11	2.82653	11.0281	-8.09176	1.5778e-06	3.4882e-05	5.55967
ENSOARG00000015500		Uncharacterized protein	Source:UniProtKB/TrEMBL;Acc:W5Q1P1]	17	-4.02457	2.85572	8.08737	1.58751e-06	3.50384e-05	5.51186
ENSOARG00000016807	SAMHD1	SAM domain and HD domain 1	Source:HGNC Symbol;Acc:HGNC:15925]	13	-4.81104	8.08525	8.07553	1.61399e-06	3.55638e-05	5.53219
ENSOARG00000007503	POLR1C	polymerase (RNA) I polypeptide C, 30kDa	Source:HGNC Symbol;Acc:HGNC:20194]	20	3.01774	6.37247	-8.06873	1.62942e-06	3.57569e-05	5.51935
ENSOARG00000019451	RPAP3	RNA polymerase II associated protein 3	Source:HGNC Symbol;Acc:HGNC:26151]	3	-5.11335	4.00572	8.07038	1.62566e-06	3.57569e-05	5.54656
ENSOARG00000019454	RBKS	ribokinase	Source:HGNC Symbol;Acc:HGNC:30325]	3	-6.12788	2.00566	8.06812	1.63081e-06	3.57569e-05	5.32904
ENSOARG00000004983	VAV1	vav 1 guanine nucleotide exchange factor	Source:HGNC Symbol;Acc:HGNC:12657]	5	-3.53926	5.74717	8.05066	1.67115e-06	3.64612e-05	5.50022
ENSOARG00000017889	PHKA1	phosphorylase kinase, alpha 1 (muscle)	Source:HGNC Symbol;Acc:HGNC:8925]	X	-5.42189	3.59602	8.05079	1.67085e-06	3.64612e-05	5.50893
ENSOARG00000007110	PLA2R1	phospholipase A2 receptor 1, 180kDa	Source:HGNC Symbol;Acc:HGNC:9042]	2	-14.2241	-1.19671	8.0507	1.67107e-06	3.64612e-05	3.25723
ENSOARG00000012477	ZNF143	zinc finger protein 143	Source:HGNC Symbol;Acc:HGNC:12928]	15	-2.87415	5.067	8.04439	1.68591e-06	3.66032e-05	5.50198
ENSOARG00000020669	HIST2H2BF	histone cluster 2, H2bf	Source:HGNC Symbol;Acc:HGNC:24700]	1	-5.35556	2.0674	8.04463	1.68534e-06	3.66032e-05	5.32111
ENSOARG00000010647	PTGIR	prostaglandin I2 (prostacyclin) receptor (IP)	Source:HGNC Symbol;Acc:HGNC:9602]	14	-8.64036	0.893613	8.04566	1.68291e-06	3.66032e-05	4.81915
ENSOARG00000009745	SMC3	structural maintenance of chromosomes 3	Source:HGNC Symbol;Acc:HGNC:2468]	22	-2.51125	7.05237	8.03979	1.69682e-06	3.67802e-05	5.47913
ENSOARG00000001946	ORC5	origin recognition complex, subunit 5	Source:HGNC Symbol;Acc:HGNC:8491]	4	-5.35462	2.18412	8.03829	1.7004e-06	3.67978e-05	5.34148
ENSOARG00000006723	TXNDC11	thioredoxin domain containing 11	Source:HGNC Symbol;Acc:HGNC:28030]	24	3.79162	7.69835	-8.0318	1.71594e-06	3.70737e-05	5.47015
ENSOARG00000011127	KIF13A	kinesin family member 13A	Source:HGNC Symbol;Acc:HGNC:14566]	20	5.26145	5.87965	-8.01863	1.74798e-06	3.77048e-05	5.45613
ENSOARG00000016854	CREM	cAMP responsive element modulator	Source:HGNC Symbol;Acc:HGNC:2352]	13	4.19382	8.09559	-8.01265	1.76272e-06	3.79613e-05	5.44454
ENSOARG00000015302		Uncharacterized protein	Source:UniProtKB/TrEMBL;Acc:W5Q129]	6	5.16384	5.58227	-8.00646	1.77814e-06	3.79859e-05	5.44275
ENSOARG00000019572	QTRTD1	queuine tRNA-ribosyltransferase domain containing 1	Source:HGNC Symbol;Acc:HGNC:25771]	1	4.57588	3.57251	-8.00844	1.77318e-06	3.79859e-05	5.45357
ENSOARG00000003105	TIMM44	translocase of inner mitochondrial membrane 44 homolog (yeast)	Source:HGNC Symbol;Acc:HGNC:17316]	5	2.75792	4.95806	-8.01002	1.76925e-06	3.79859e-05	5.45607
ENSOARG00000018223	ATXN2	ataxin 2	Source:HGNC Symbol;Acc:HGNC:10555]	17	-3.34976	5.08394	8.00726	1.77612e-06	3.79859e-05	5.45065
ENSOARG00000020725	PDE6D	phosphodiesterase 6D, cGMP-specific, rod, delta	Source:HGNC Symbol;Acc:HGNC:8788]	2	-7.35516	1.62319	8.00738	1.77582e-06	3.79859e-05	5.12827
ENSOARG00000010785		Uncharacterized protein	Source:UniProtKB/TrEMBL;Acc:W5PM90]	JH923649.1	4.77056	5.41904	-8.00361	1.78526e-06	3.8016e-05	5.44074
ENSOARG00000017599	PCSK1	proprotein convertase subtilisin/kexin type 1	Source:HGNC Symbol;Acc:HGNC:8743]	5	-11.5642	0.237229	8.00376	1.7849e-06	3.8016e-05	4.23336
ENSOARG00000018600	CEP97	centrosomal protein 97kDa	Source:HGNC Symbol;Acc:HGNC:26244]	1	-5.52995	2.12401	8.00136	1.79093e-06	3.80759e-05	5.27921
ENSOARG00000014303	STX7	syntaxin 7	Source:HGNC Symbol;Acc:HGNC:11442]	8	-4.74825	4.97383	7.99835	1.79853e-06	3.81763e-05	5.44161
ENSOARG00000017232	ACVR1B	activin A receptor, type IB	Source:HGNC Symbol;Acc:HGNC:172]	3	-4.17723	4.03427	7.99472	1.80775e-06	3.82501e-05	5.44464
ENSOARG00000014385	ABCA6	ATP-binding cassette, sub-family A (ABC1), member 6	Source:HGNC Symbol;Acc:HGNC:36]	11	-5.19889	3.80687	7.99554	1.80565e-06	3.82501e-05	5.44123
ENSOARG00000014981				5	3.23431	6.37892	-7.98895	1.82248e-06	3.85007e-05	5.40801
ENSOARG00000001020	BCOR	BCL6 corepressor	Source:HGNC Symbol;Acc:HGNC:20893]	X	4.22343	8.07178	-7.98053	1.84423e-06	3.88385e-05	5.39942
ENSOARG00000007351		Uncharacterized protein	Source:UniProtKB/TrEMBL;Acc:W5PBR9]	18	-5.33211	2.11538	7.97998	1.84566e-06	3.88385e-05	5.25629
ENSOARG00000020222	ITGB5	integrin, beta 5	Source:HGNC Symbol;Acc:HGNC:6160]	1	-7.65799	4.64439	7.97938	1.84723e-06	3.88385e-05	5.42289
ENSOARG00000011816	GID8	GID complex subunit 8	Source:HGNC Symbol;Acc:HGNC:15857]	13	2.53091	4.77405	-7.97203	1.86647e-06	3.9058e-05	5.40678
ENSOARG00000003311	POFUT1	protein O-fucosyltransferase 1	Source:HGNC Symbol;Acc:HGNC:14988]	13	-4.82942	2.46268	7.97258	1.86502e-06	3.9058e-05	5.30938
ENSOARG00000001639	GPR15	G protein-coupled receptor 15	Source:HGNC Symbol;Acc:HGNC:4469]	1	-7.44693	2.93737	7.97288	1.86423e-06	3.9058e-05	5.35112
ENSOARG00000006571				21	3.22052	8.44183	-7.96896	1.87458e-06	3.91661e-05	5.38427
ENSOARG00000019534	IPO8	importin 8	Source:HGNC Symbol;Acc:HGNC:9853]	3	-2.93396	4.75648	7.95994	1.89859e-06	3.94824e-05	5.3904
ENSOARG00000020657	LAMP3	lysosomal-associated membrane protein 3	Source:HGNC Symbol;Acc:HGNC:14582]	1	-4.52006	5.33443	7.95993	1.89862e-06	3.94824e-05	5.38152
ENSOARG00000012972				16	-5.70439	4.15822	7.96041	1.89732e-06	3.94824e-05	5.39794
ENSOARG00000002714		Uncharacterized protein	Source:UniProtKB/TrEMBL;Acc:W5NXI2]	14	-4.69329	4.62106	7.94888	1.92847e-06	4.00406e-05	5.37872
ENSOARG00000001066		Uncharacterized protein	Source:UniProtKB/TrEMBL;Acc:W5NSH1]	24	2.24859	6.21747	-7.94703	1.93354e-06	4.00416e-05	5.34876
ENSOARG00000019392	PRMT5	protein arginine methyltransferase 5	Source:HGNC Symbol;Acc:HGNC:10894]	7	-2.45127	5.43703	7.94666	1.93454e-06	4.00416e-05	5.35817
ENSOARG00000010376		Uncharacterized protein	Source:UniProtKB/TrEMBL;Acc:W5PL13]	3	-3.09868	4.2732	7.94316	1.94413e-06	4.01776e-05	5.37372
ENSOARG00000008733	ASB6	ankyrin repeat and SOCS box containing 6	Source:HGNC Symbol;Acc:HGNC:17181]	3	3.31463	4.04239	-7.93752	1.95972e-06	4.01878e-05	5.36662
ENSOARG00000018966	BBS4	Bardet-Biedl syndrome 4	Source:HGNC Symbol;Acc:HGNC:969]	7	-3.27055	3.9876	7.93767	1.95929e-06	4.01878e-05	5.36668
ENSOARG00000019369	AHCYL1	adenosylhomocysteinase-like 1	Source:HGNC Symbol;Acc:HGNC:344]	1	-3.28408	5.55669	7.93963	1.95386e-06	4.01878e-05	5.34686
ENSOARG00000018563	NDUFS1	NADH dehydrogenase (ubiquinone) Fe-S protein 1, 75kDa (NADH-coenzyme Q reductase)	Source:HGNC Symbol;Acc:HGNC:7707]	2	-3.3317	5.11163	7.9399	1.95312e-06	4.01878e-05	5.35605
ENSOARG00000000510	IFNGR1	interferon gamma receptor 1	Source:HGNC Symbol;Acc:HGNC:5439]	8	-4.67533	6.4305	7.93862	1.95665e-06	4.01878e-05	5.33787
ENSOARG00000004587	TOMM34	translocase of outer mitochondrial membrane 34	Source:HGNC Symbol;Acc:HGNC:15746]	13	-4.52531	3.12376	7.93348	1.97095e-06	4.0356e-05	5.32808
ENSOARG00000007087		Uncharacterized protein	Source:UniProtKB/TrEMBL;Acc:W5PAY6]	18	-5.94241	1.41231	7.92879	1.98408e-06	4.05566e-05	4.98805
ENSOARG00000004807	EMR1	egf-like module containing, mucin-like, hormone receptor-like 1	Source:HGNC Symbol;Acc:HGNC:3336]	5	-7.02235	6.97841	7.9278	1.98684e-06	4.05566e-05	5.32317
ENSOARG00000011716	DDB1	damage-specific DNA binding protein 1, 127kDa	Source:HGNC Symbol;Acc:HGNC:2717]	21	-2.98827	6.4749	7.92581	1.99247e-06	4.06091e-05	5.3183
ENSOARG00000004389	SYPL1	synaptophysin-like 1	Source:HGNC Symbol;Acc:HGNC:11507]	4	-3.03881	4.54886	7.92452	1.9961e-06	4.06209e-05	5.34471
ENSOARG00000015756	AHRR	aryl-hydrocarbon receptor repressor	Source:HGNC Symbol;Acc:HGNC:346]	16	-9.80289	2.32563	7.92209	2.00298e-06	4.06988e-05	5.15763
ENSOARG00000013304	ZNF41	zinc finger protein 41	Source:HGNC Symbol;Acc:HGNC:13107]	X	-3.36874	2.97224	7.92094	2.00625e-06	4.0703e-05	5.30645
ENSOARG00000008181	FABP7	fatty acid binding protein 7, brain	Source:HGNC Symbol;Acc:HGNC:3562]	8	-9.08584	0.666571	7.9193	2.01091e-06	4.07355e-05	4.55518
ENSOARG00000013129		Uncharacterized protein	Source:UniProtKB/TrEMBL;Acc:W5PUD9]	2	-6.25419	2.58592	7.91797	2.0147e-06	4.07502e-05	5.2471
ENSOARG00000014249				4	2.64197	4.70678	-7.91506	2.02303e-06	4.08567e-05	5.32845
ENSOARG00000014746	MAP3K15	mitogen-activated protein kinase kinase kinase 15	Source:HGNC Symbol;Acc:HGNC:31689]	X	3.69274	4.40054	-7.91118	2.03419e-06	4.09576e-05	5.32929
ENSOARG00000008054	ZBTB40	zinc finger and BTB domain containing 40	Source:HGNC Symbol;Acc:HGNC:29045]	2	-4.12761	3.83994	7.91128	2.03391e-06	4.09576e-05	5.32875
ENSOARG00000014127	HLCS	holocarboxylase synthetase (biotin-(proprionyl-CoA-carboxylase (ATP-hydrolysing)) ligase)	Source:HGNC Symbol;Acc:HGNC:4976]	1	3.73994	2.90954	-7.90979	2.0382e-06	4.09765e-05	5.28542
ENSOARG00000011033	MED7	mediator complex subunit 7	Source:HGNC Symbol;Acc:HGNC:2378]	5	-3.23867	4.89292	7.90858	2.04169e-06	4.09846e-05	5.31636
ENSOARG00000012588	C9orf41	chromosome 9 open reading frame 41	Source:HGNC Symbol;Acc:HGNC:23435]	2	4.48702	2.4431	-7.90149	2.06234e-06	4.11727e-05	5.21864
ENSOARG00000005364	PCED1A	PC-esterase domain containing 1A	Source:HGNC Symbol;Acc:HGNC:16212]	13	4.03786	3.06388	-7.89787	2.07294e-06	4.11727e-05	5.28092
ENSOARG00000020552	TRA2B	transformer 2 beta homolog (Drosophila)	Source:HGNC Symbol;Acc:HGNC:10781]	1	2.65861	8.47376	-7.89888	2.06998e-06	4.11727e-05	5.28562
ENSOARG00000010234	CCAR2	cell cycle and apoptosis regulator 2	Source:HGNC Symbol;Acc:HGNC:23360]	2	-2.55799	7.01193	7.90233	2.05989e-06	4.11727e-05	5.28553
ENSOARG00000010175		Uncharacterized protein	Source:UniProtKB/TrEMBL;Acc:W5PKE2]	X	-2.96341	4.53482	7.8975	2.07406e-06	4.11727e-05	5.30721
ENSOARG00000017766	PRRC1	proline-rich coiled-coil 1	Source:HGNC Symbol;Acc:HGNC:28164]	5	-4.42333	3.33881	7.90253	2.05929e-06	4.11727e-05	5.30244
ENSOARG00000019638	TRAPPC3	trafficking protein particle complex 3	Source:HGNC Symbol;Acc:HGNC:19942]	1	-5.45926	3.84607	7.8969	2.07581e-06	4.11727e-05	5.30838
ENSOARG00000006358	CSF1R	colony stimulating factor 1 receptor	Source:HGNC Symbol;Acc:HGNC:2433]	5	-5.56251	6.66173	7.89719	2.07496e-06	4.11727e-05	5.27939
ENSOARG00000007124	IKBKAP	inhibitor of kappa light polypeptide gene enhancer in B-cells, kinase complex-associated protein	Source:HGNC Symbol;Acc:HGNC:5959]	2	-4.01677	4.5303	7.89254	2.08869e-06	4.13206e-05	5.3012
ENSOARG00000020078	EAF2	ELL associated factor 2	Source:HGNC Symbol;Acc:HGNC:23115]	1	-5.95703	3.92671	7.89228	2.08947e-06	4.13206e-05	5.3025
ENSOARG00000020165	ZHX2	zinc fingers and homeoboxes 2	Source:HGNC Symbol;Acc:HGNC:18513]	9	-5.53113	5.47884	7.8884	2.10103e-06	4.14876e-05	5.28069
ENSOARG00000017851	SMARCAD1	SWI/SNF-related, matrix-associated actin-dependent regulator of chromatin, subfamily a, containing DEAD/H box 1	Source:HGNC Symbol;Acc:HGNC:18398]	6	-3.46342	3.71323	7.87946	2.12787e-06	4.19553e-05	5.28406
ENSOARG00000019955	ANKZF1	ankyrin repeat and zinc finger domain containing 1	Source:HGNC Symbol;Acc:HGNC:25527]	2	-3.40844	3.79808	7.87654	2.13674e-06	4.20678e-05	5.28132
ENSOARG00000007425		Uncharacterized protein	Source:UniProtKB/TrEMBL;Acc:W5PC06]	13	-4.49287	6.77369	7.87051	2.15513e-06	4.23673e-05	5.24052
ENSOARG00000010390	LIMD1	LIM domains containing 1	Source:HGNC Symbol;Acc:HGNC:6612]	19	3.45983	6.31575	-7.86457	2.17344e-06	4.26641e-05	5.23287
ENSOARG00000009034	BET1L	Bet1 golgi vesicular membrane trafficking protein-like	Source:HGNC Symbol;Acc:HGNC:19348]	21	-3.22609	4.20871	7.86268	2.17928e-06	4.27159e-05	5.26277
ENSOARG00000011162		Uncharacterized protein	Source:UniProtKB/TrEMBL;Acc:W5PND9]	1	2.49464	7.60276	-7.85286	2.20997e-06	4.32178e-05	5.21749
ENSOARG00000014707	ACO1	aconitase 1, soluble	Source:HGNC Symbol;Acc:HGNC:117]	2	-5.08877	3.25832	7.85241	2.21139e-06	4.32178e-05	5.22924
ENSOARG00000005159		Uncharacterized protein	Source:UniProtKB/TrEMBL;Acc:W5P529]	23	-7.96826	5.05041	7.84238	2.24324e-06	4.3776e-05	5.22827
ENSOARG00000020735	ZNF609	zinc finger protein 609	Source:HGNC Symbol;Acc:HGNC:29003]	7	-3.1189	5.05004	7.84032	2.24984e-06	4.37766e-05	5.21729
ENSOARG00000013065	IKBIP	IKBKB interacting protein	Source:HGNC Symbol;Acc:HGNC:26430]	3	-5.88402	1.8061	7.84082	2.24823e-06	4.37766e-05	5.00412
ENSOARG00000017820	DYRK2	dual-specificity tyrosine-(Y)-phosphorylation regulated kinase 2	Source:HGNC Symbol;Acc:HGNC:3093]	3	3.81058	5.30221	-7.83907	2.25385e-06	4.37904e-05	5.2106
ENSOARG00000010471	SPG20	spastic paraplegia 20 (Troyer syndrome)	Source:HGNC Symbol;Acc:HGNC:18514]	10	-5.46037	3.06887	7.83603	2.26367e-06	4.39171e-05	5.19186
ENSOARG00000009109	ALG11	ALG11, alpha-1,2-mannosyltransferase	Source:HGNC Symbol;Acc:HGNC:32456]	10	3.42188	4.70943	-7.83191	2.27699e-06	4.41113e-05	5.21296
ENSOARG00000008876	CDC16	cell division cycle 16	Source:HGNC Symbol;Acc:HGNC:1720]	10	3.17787	5.74793	-7.82978	2.28394e-06	4.41817e-05	5.18838
ENSOARG00000010406	IFT46	intraflagellar transport 46	Source:HGNC Symbol;Acc:HGNC:26146]	15	-3.83621	3.85964	7.82493	2.29981e-06	4.4342e-05	5.21075
ENSOARG00000012082	CCP110	centriolar coiled coil protein 110kDa	Source:HGNC Symbol;Acc:HGNC:24342]	24	-4.51532	3.95222	7.82419	2.30223e-06	4.4342e-05	5.2101
ENSOARG00000009542	DCAKD	dephospho-CoA kinase domain containing	Source:HGNC Symbol;Acc:HGNC:26238]	11	-8.97796	1.53952	7.80035	2.38206e-06	4.58133e-05	4.7976
ENSOARG00000007757	RBM15B	RNA binding motif protein 15B	Source:HGNC Symbol;Acc:HGNC:24303]	19	3.33521	5.75974	-7.79921	2.38595e-06	4.58219e-05	5.14579
ENSOARG00000018505	PPIP5K2	diphosphoinositol pentakisphosphate kinase 2	Source:HGNC Symbol;Acc:HGNC:29035]	5	-3.83303	4.6354	7.79622	2.39619e-06	4.58861e-05	5.1641
ENSOARG00000001685	MMACHC	methylmalonic aciduria (cobalamin deficiency) cblC type, with homocystinuria	Source:HGNC Symbol;Acc:HGNC:24525]	1	-6.27732	1.16697	7.79721	2.3928e-06	4.58861e-05	4.74054
ENSOARG00000000736	PKMYT1	protein kinase, membrane associated tyrosine/threonine 1	Source:HGNC Symbol;Acc:HGNC:29650]	24	4.75081	2.45102	-7.79297	2.40737e-06	4.59905e-05	5.07732
ENSOARG00000018162	PTPN12	protein tyrosine phosphatase, non-receptor type 12	Source:HGNC Symbol;Acc:HGNC:9645]	4	-3.58566	5.55569	7.79263	2.40855e-06	4.59905e-05	5.13926
ENSOARG00000007139	THUMPD3	THUMP domain containing 3	Source:HGNC Symbol;Acc:HGNC:24493]	19	-2.83259	4.77025	7.79027	2.41668e-06	4.60363e-05	5.15235
ENSOARG00000013049	SLC35A1	solute carrier family 35 (CMP-sialic acid transporter), member A1	Source:HGNC Symbol;Acc:HGNC:11021]	8	-4.8713	2.45026	7.78993	2.41786e-06	4.60363e-05	5.07329
ENSOARG00000004690	DNMT3B	Uncharacterized protein	Source:UniProtKB/TrEMBL;Acc:W5P3M3]	13	3.08211	7.83525	-7.78566	2.43271e-06	4.62402e-05	5.12253
ENSOARG00000002309		Uncharacterized protein	Source:UniProtKB/TrEMBL;Acc:W5NWA1]	3	-2.28733	5.99689	7.78485	2.43552e-06	4.62402e-05	5.12009
ENSOARG00000009771		Uncharacterized protein	Source:UniProtKB/TrEMBL;Acc:W5PJ52]	X	-2.97383	3.881	7.78311	2.4416e-06	4.62896e-05	5.15319
ENSOARG00000019913		Uncharacterized protein	Source:UniProtKB/TrEMBL;Acc:W5QF83]	3	7.24839	4.30006	-7.77973	2.45347e-06	4.64485e-05	5.14843
ENSOARG00000011495				14	3.47235	7.24915	-7.77612	2.46621e-06	4.66233e-05	5.10659
ENSOARG00000017971	ZKSCAN1	zinc finger with KRAB and SCAN domains 1	Source:HGNC Symbol;Acc:HGNC:13101]	24	3.75906	6.07665	-7.77449	2.47197e-06	4.66658e-05	5.10632
ENSOARG00000012352	TCF7L2	transcription factor 7-like 2 (T-cell specific, HMG-box)	Source:HGNC Symbol;Acc:HGNC:11641]	22	-4.79587	2.72272	7.77327	2.47629e-06	4.66813e-05	5.08355
ENSOARG00000010147	TP53BP1	tumor protein p53 binding protein 1	Source:HGNC Symbol;Acc:HGNC:11999]	18	-2.79612	5.66933	7.76477	2.50671e-06	4.71212e-05	5.09631
ENSOARG00000018389	GSAP	gamma-secretase activating protein	Source:HGNC Symbol;Acc:HGNC:28042]	4	-5.60433	3.82787	7.76528	2.50484e-06	4.71212e-05	5.12719
ENSOARG00000003543	ADAM15	ADAM metallopeptidase domain 15	Source:HGNC Symbol;Acc:HGNC:193]	1	5.68182	3.51779	-7.76251	2.51484e-06	4.72073e-05	5.11692
ENSOARG00000011726	DAZAP1	DAZ associated protein 1	Source:HGNC Symbol;Acc:HGNC:2683]	5	2.91592	6.63663	-7.75936	2.52623e-06	4.72396e-05	5.08108
ENSOARG00000015339	ICE1	interactor of little elongation complex ELL subunit 1	Source:HGNC Symbol;Acc:HGNC:29154]	16	2.67736	5.82587	-7.75863	2.52891e-06	4.72396e-05	5.08498
ENSOARG00000000276	WIPF1	WAS/WASL interacting protein family, member 1	Source:HGNC Symbol;Acc:HGNC:12736]	2	-3.10514	6.04582	7.75988	2.52437e-06	4.72396e-05	5.08463
ENSOARG00000005012	NBR1	neighbor of BRCA1 gene 1	Source:HGNC Symbol;Acc:HGNC:6746]	11	-3.3508	7.00453	7.75812	2.53075e-06	4.72396e-05	5.08003
ENSOARG00000016864	LONP2	lon peptidase 2, peroxisomal	Source:HGNC Symbol;Acc:HGNC:20598]	14	-3.66636	4.42833	7.75668	2.53597e-06	4.72706e-05	5.11236
ENSOARG00000011845	TRIM37	tripartite motif containing 37	Source:HGNC Symbol;Acc:HGNC:7523]	11	-4.62144	3.69844	7.75461	2.54353e-06	4.73453e-05	5.11088
ENSOARG00000014445	ORAI2	ORAI calcium release-activated calcium modulator 2	Source:HGNC Symbol;Acc:HGNC:21667]	24	4.07646	5.61437	-7.7473	2.5704e-06	4.77786e-05	5.07457
ENSOARG00000010950	PTK6	protein tyrosine kinase 6	Source:HGNC Symbol;Acc:HGNC:9617]	13	6.27631	0.700472	-7.74499	2.57894e-06	4.78216e-05	4.46495
ENSOARG00000000250	C4orf3	chromosome 4 open reading frame 3	Source:HGNC Symbol;Acc:HGNC:19225]	6	-2.6617	5.8845	7.74473	2.5799e-06	4.78216e-05	5.06452
ENSOARG00000011384	RHOT1	ras homolog family member T1	Source:HGNC Symbol;Acc:HGNC:21168]	11	-4.06925	3.55288	7.74036	2.5962e-06	4.80568e-05	5.08935
ENSOARG00000017678	WDR74	WD repeat domain 74	Source:HGNC Symbol;Acc:HGNC:25529]	21	2.70112	5.75698	-7.73787	2.60549e-06	4.80949e-05	5.05635
ENSOARG00000009538				12	-4.1373	8.86371	7.73863	2.60267e-06	4.80949e-05	5.05797
ENSOARG00000001572	AIMP2	aminoacyl tRNA synthase complex-interacting multifunctional protein 2	Source:RefSeq peptide;Acc:NP_001156039]	24	3.78654	4.29961	-7.73493	2.61656e-06	4.82325e-05	5.08341
ENSOARG00000003959	RASGEF1A	RasGEF domain family, member 1A	Source:HGNC Symbol;Acc:HGNC:24246]	25	6.08252	4.72854	-7.73332	2.62262e-06	4.82773e-05	5.07602
ENSOARG00000017883	RBM38	RNA binding motif protein 38	Source:HGNC Symbol;Acc:HGNC:15818]	13	4.14258	5.45352	-7.73016	2.63459e-06	4.84306e-05	5.05263
ENSOARG00000000035	CYTB	cytochrome b	Source:RefSeq peptide;Acc:NP_008418]	MT	2.29726	12.5341	-7.72245	2.66398e-06	4.89033e-05	5.0407
ENSOARG00000008685	SLC35C2	solute carrier family 35 (GDP-fucose transporter), member C2	Source:HGNC Symbol;Acc:HGNC:17117]	13	3.62347	5.19419	-7.71799	2.68119e-06	4.90164e-05	5.04047
ENSOARG00000012979	LRRC32	leucine rich repeat containing 32	Source:HGNC Symbol;Acc:HGNC:4161]	15	-4.05305	2.96978	7.71908	2.67697e-06	4.90164e-05	5.03268
ENSOARG00000010000	ASGR2	asialoglycoprotein receptor 2	Source:HGNC Symbol;Acc:HGNC:743]	11	-16.5833	0.921348	7.71805	2.68095e-06	4.90164e-05	4.09531
ENSOARG00000000644	FAM83D	family with sequence similarity 83, member D	Source:HGNC Symbol;Acc:HGNC:16122]	13	4.2296	3.64387	-7.71403	2.6965e-06	4.92287e-05	5.05481
ENSOARG00000004209	P2RY13	purinergic receptor P2Y, G-protein coupled, 13	Source:HGNC Symbol;Acc:HGNC:4537]	1	-11.9573	1.14569	7.71304	2.70037e-06	4.92319e-05	4.33855
ENSOARG00000019427	PPARA	peroxisome proliferator-activated receptor alpha	Source:HGNC Symbol;Acc:HGNC:9232]	3	7.06981	1.5299	-7.71164	2.70584e-06	4.92328e-05	4.73411
ENSOARG00000019211	KANSL2	KAT8 regulatory NSL complex subunit 2	Source:HGNC Symbol;Acc:HGNC:26024]	3	3.03909	6.30394	-7.71063	2.70978e-06	4.92328e-05	5.01172
ENSOARG00000004730	STK4	serine/threonine kinase 4	Source:HGNC Symbol;Acc:HGNC:11408]	13	-2.8525	6.85167	7.70924	2.71522e-06	4.92328e-05	5.00908
ENSOARG00000020482				1	-3.93756	4.39585	7.70987	2.71275e-06	4.92328e-05	5.04688
ENSOARG00000017502	ACRC	acidic repeat containing	Source:HGNC Symbol;Acc:HGNC:15805]	X	4.08062	4.07071	-7.70371	2.73696e-06	4.95027e-05	5.04207
ENSOARG00000000531		Uncharacterized protein	Source:UniProtKB/TrEMBL;Acc:W5NQX0]	5	2.84683	6.93381	-7.70356	2.73755e-06	4.95027e-05	5.00123
ENSOARG00000015858		Uncharacterized protein	Source:UniProtKB/TrEMBL;Acc:W5Q2T9]	1	3.99033	2.11157	-7.69498	2.77167e-06	5.00061e-05	4.90248
ENSOARG00000015553	GRINA	glutamate receptor, ionotropic, N-methyl D-aspartate-associated protein 1 (glutamate binding)	Source:HGNC Symbol;Acc:HGNC:4589]	9	3.08669	5.74818	-7.69467	2.7729e-06	5.00061e-05	4.99577
ENSOARG00000006933	RSF1	remodeling and spacing factor 1	Source:HGNC Symbol;Acc:HGNC:18118]	21	-2.47798	6.14835	7.69267	2.78093e-06	5.00832e-05	4.9863
ENSOARG00000003933	CSGALNACT1	chondroitin sulfate N-acetylgalactosaminyltransferase 1	Source:HGNC Symbol;Acc:HGNC:24290]	26	-6.96936	1.96661	7.68897	2.79584e-06	5.02156e-05	4.82478
ENSOARG00000014592		Uncharacterized protein	Source:UniProtKB/TrEMBL;Acc:W5PYW3]	6	-7.54636	3.53826	7.68908	2.79537e-06	5.02156e-05	5.01127
ENSOARG00000007626	AKAP1	A kinase (PRKA) anchor protein 1	Source:HGNC Symbol;Acc:HGNC:367]	11	4.27039	5.4549	-7.68584	2.80849e-06	5.03072e-05	4.98984
ENSOARG00000015243	IMPAD1	inositol monophosphatase domain containing 1	Source:HGNC Symbol;Acc:HGNC:26019]	9	2.52327	6.12848	-7.68648	2.8059e-06	5.03072e-05	4.97761
ENSOARG00000010575	SUOX	sulfite oxidase	Source:HGNC Symbol;Acc:HGNC:11460]	3	-4.56928	4.09748	7.67957	2.83408e-06	5.06973e-05	5.00815
ENSOARG00000010799	FBXL20	F-box and leucine-rich repeat protein 20	Source:HGNC Symbol;Acc:HGNC:24679]	11	-3.58665	5.25773	7.66945	2.87587e-06	5.13758e-05	4.96896
ENSOARG00000014475	ZC3H8	zinc finger CCCH-type containing 8	Source:HGNC Symbol;Acc:HGNC:30941]	3	-3.98361	3.43265	7.66715	2.88547e-06	5.14782e-05	4.9858
ENSOARG00000008189	PKIB	protein kinase (cAMP-dependent, catalytic) inhibitor beta	Source:HGNC Symbol;Acc:HGNC:9018]	8	-5.65158	4.91273	7.66592	2.89059e-06	5.15005e-05	4.97836
ENSOARG00000009748	DLC1	DLC1 Rho GTPase activating protein	Source:HGNC Symbol;Acc:HGNC:2897]	26	-8.1572	5.34981	7.66433	2.89726e-06	5.15504e-05	4.96886
ENSOARG00000015904	FGFR3	fibroblast growth factor receptor 3	Source:HGNC Symbol;Acc:HGNC:3690]	6	3.95402	3.22156	-7.66021	2.91462e-06	5.179e-05	4.96823
ENSOARG00000020093	UBE2N	Ovis aries ubiquitin-conjugating enzyme E2N (UBE2N), mRNA.	Source:RefSeq mRNA;Acc:NM_001163058]	20	2.56004	5.84291	-7.65816	2.92328e-06	5.18746e-05	4.93955
ENSOARG00000001168	PPP4R1	protein phosphatase 4, regulatory subunit 1	Source:HGNC Symbol;Acc:HGNC:9320]	23	2.39055	6.00302	-7.65455	2.93862e-06	5.20774e-05	4.93251
ENSOARG00000000557	PRPF4B	pre-mRNA processing factor 4B	Source:HGNC Symbol;Acc:HGNC:17346]	20	2.93853	7.53432	-7.65288	2.94571e-06	5.21065e-05	4.93013
ENSOARG00000007250	IBTK	inhibitor of Bruton agammaglobulinemia tyrosine kinase	Source:HGNC Symbol;Acc:HGNC:17853]	8	-2.85658	5.31279	7.65233	2.94809e-06	5.21065e-05	4.94213
ENSOARG00000016227	DCAF13	DDB1 and CUL4 associated factor 13	Source:HGNC Symbol;Acc:HGNC:24535]	9	2.65718	6.36783	-7.65115	2.95312e-06	5.21261e-05	4.92513
ENSOARG00000012245	MTMR12	myotubularin related protein 12	Source:HGNC Symbol;Acc:HGNC:18191]	16	3.42715	3.10698	-7.6458	2.97611e-06	5.24624e-05	4.94428
ENSOARG00000001504	SREBF1	sterol regulatory element binding transcription factor 1	Source:HGNC Symbol;Acc:HGNC:11289]	11	6.56064	5.99729	-7.64318	2.98744e-06	5.25416e-05	4.92308
ENSOARG00000003198	ZC3H14	zinc finger CCCH-type containing 14	Source:HGNC Symbol;Acc:HGNC:20509]	7	2.53611	7.02107	-7.64159	2.99433e-06	5.25416e-05	4.91171
ENSOARG00000013053	IQGAP1	IQ motif containing GTPase activating protein 1	Source:HGNC Symbol;Acc:HGNC:6110]	18	-2.66946	8.4487	7.64027	3.00011e-06	5.25416e-05	4.91526
ENSOARG00000017147	NCOR1	nuclear receptor corepressor 1	Source:HGNC Symbol;Acc:HGNC:7672]	11	-2.70439	7.40817	7.64021	3.00035e-06	5.25416e-05	4.91116
ENSOARG00000008861	SLAMF6	SLAM family member 6	Source:HGNC Symbol;Acc:HGNC:21392]	1	-5.07908	5.40773	7.64034	2.99977e-06	5.25416e-05	4.92637
ENSOARG00000007393	NDST1	N-deacetylase/N-sulfotransferase (heparan glucosaminyl) 1	Source:HGNC Symbol;Acc:HGNC:7680]	5	6.22171	3.75363	-7.6323	3.035e-06	5.30787e-05	4.94119
ENSOARG00000006976	TCEANC2	transcription elongation factor A (SII) N-terminal and central domain containing 2	Source:HGNC Symbol;Acc:HGNC:26494]	1	-6.45076	2.29501	7.62857	3.0515e-06	5.3297e-05	4.82937
ENSOARG00000008339		Uncharacterized protein	Source:UniProtKB/TrEMBL;Acc:W5PES6]	4	3.2593	4.47812	-7.62715	3.05778e-06	5.32994e-05	4.92731
ENSOARG00000017191	SIPA1	signal-induced proliferation-associated 1	Source:HGNC Symbol;Acc:HGNC:10885]	21	3.00034	7.9043	-7.62583	3.06365e-06	5.32994e-05	4.8924
ENSOARG00000019308	BTLA	B and T lymphocyte associated	Source:HGNC Symbol;Acc:HGNC:21087]	1	-4.23763	2.92047	7.62614	3.06228e-06	5.32994e-05	4.90393
ENSOARG00000003621	CTDSPL2	CTD (carboxy-terminal domain, RNA polymerase II, polypeptide A) small phosphatase like 2	Source:HGNC Symbol;Acc:HGNC:26936]	7	2.23036	5.62259	-7.62453	3.06942e-06	5.33301e-05	4.89465
ENSOARG00000009943	CD3EAP	CD3e molecule, epsilon associated protein	Source:HGNC Symbol;Acc:HGNC:24219]	14	4.735	5.41596	-7.61954	3.09177e-06	5.35998e-05	4.89564
ENSOARG00000016487	NARF	nuclear prelamin A recognition factor	Source:HGNC Symbol;Acc:HGNC:29916]	11	3.8556	7.42651	-7.61786	3.09931e-06	5.35998e-05	4.87886
ENSOARG00000010596	GMEB2	glucocorticoid modulatory element binding protein 2	Source:HGNC Symbol;Acc:HGNC:4371]	13	2.6955	5.34942	-7.61659	3.10507e-06	5.35998e-05	4.8896
ENSOARG00000018094	RSBN1L	round spermatid basic protein 1-like	Source:HGNC Symbol;Acc:HGNC:24765]	4	-2.64542	5.41914	7.61851	3.09641e-06	5.35998e-05	4.89051
ENSOARG00000008264	FMNL2	formin-like 2	Source:HGNC Symbol;Acc:HGNC:18267]	2	-7.42821	0.954876	7.61673	3.10441e-06	5.35998e-05	4.40635
ENSOARG00000016745	MSRB1	methionine sulfoxide reductase B1	Source:HGNC Symbol;Acc:HGNC:14133]	24	4.37004	5.46333	-7.61303	3.12118e-06	5.37734e-05	4.88409
ENSOARG00000010986	SLC35D1	solute carrier family 35 (UDP-GlcA/UDP-GalNAc transporter), member D1	Source:HGNC Symbol;Acc:HGNC:20800]	1	3.17922	3.35446	-7.61258	3.12321e-06	5.37734e-05	4.90837
ENSOARG00000000829	ACACA	Ovis aries acetyl-CoA carboxylase alpha (ACACA), mRNA.	Source:RefSeq mRNA;Acc:NM_001009256]	11	4.89116	4.89725	-7.60897	3.13967e-06	5.38472e-05	4.89291
ENSOARG00000020715	RMND5A	required for meiotic nuclear division 5 homolog A (S. cerevisiae)	Source:HGNC Symbol;Acc:HGNC:25850]	3	2.68458	7.43828	-7.6064	3.1514e-06	5.38472e-05	4.86218
ENSOARG00000015469	RPS6KA3	ribosomal protein S6 kinase, 90kDa, polypeptide 3	Source:HGNC Symbol;Acc:HGNC:10432]	X	-3.30627	5.06115	7.60632	3.15178e-06	5.38472e-05	4.8825
ENSOARG00000010049	PGAM4	phosphoglycerate mutase family member 4	Source:HGNC Symbol;Acc:HGNC:21731]	22	-3.3563	7.32951	7.60739	3.14689e-06	5.38472e-05	4.86317
ENSOARG00000018438	MAGT1	magnesium transporter 1	Source:HGNC Symbol;Acc:HGNC:28880]	X	-3.82693	6.87996	7.61073	3.13161e-06	5.38472e-05	4.86672
ENSOARG00000009930	PSPH	Ovis aries phosphoserine phosphatase (PSPH), mRNA.	Source:RefSeq mRNA;Acc:NM_001126360]	24	-5.17215	3.69243	7.6077	3.14545e-06	5.38472e-05	4.90587
ENSOARG00000009190		Uncharacterized protein	Source:UniProtKB/TrEMBL;Acc:W5PHE9]	X	4.97838	5.07904	-7.60415	3.16174e-06	5.39482e-05	4.88362
ENSOARG00000009070		Uncharacterized protein	Source:UniProtKB/TrEMBL;Acc:W5PH17]	1	2.71798	5.9641	-7.60307	3.16672e-06	5.3964e-05	4.85837
ENSOARG00000001885	DYNC1I2	dynein, cytoplasmic 1, intermediate chain 2	Source:HGNC Symbol;Acc:HGNC:2964]	2	-3.16822	5.92714	7.60084	3.17703e-06	5.40704e-05	4.8564
ENSOARG00000013220	RABGAP1L	RAB GTPase activating protein 1-like	Source:HGNC Symbol;Acc:HGNC:24663]	12	3.25103	6.73472	-7.59632	3.19798e-06	5.43576e-05	4.84531
ENSOARG00000008921	MTM1	myotubularin 1	Source:HGNC Symbol;Acc:HGNC:7448]	X	-4.11715	2.86769	7.59373	3.21011e-06	5.4494e-05	4.85657
ENSOARG00000013988	DPM1	dolichyl-phosphate mannosyltransferase polypeptide 1, catalytic subunit	Source:HGNC Symbol;Acc:HGNC:3005]	13	-2.4617	4.72175	7.58435	3.25425e-06	5.5173e-05	4.85903
ENSOARG00000009320	MMADHC	methylmalonic aciduria (cobalamin deficiency) cblD type, with homocystinuria	Source:HGNC Symbol;Acc:HGNC:25221]	2	-4.17868	5.51772	7.58165	3.2671e-06	5.5282e-05	4.83766
ENSOARG00000017216	STAG3	stromal antigen 3	Source:HGNC Symbol;Acc:HGNC:11356]	24	-6.81025	4.19132	7.58126	3.26899e-06	5.5282e-05	4.8697
ENSOARG00000013474	UTP6	UTP6, small subunit (SSU) processome component, homolog (yeast)	Source:HGNC Symbol;Acc:HGNC:18279]	11	3.63856	8.61979	-7.57911	3.27925e-06	5.53853e-05	4.82672
ENSOARG00000008369	CD40	CD40 molecule, TNF receptor superfamily member 5	Source:HGNC Symbol;Acc:HGNC:11919]	13	2.74204	7.07772	-7.57819	3.28363e-06	5.5389e-05	4.81956
ENSOARG00000005710	DDIAS	DNA damage-induced apoptosis suppressor	Source:HGNC Symbol;Acc:HGNC:26351]	21	3.17084	3.82788	-7.57334	3.30693e-06	5.57113e-05	4.85928
ENSOARG00000012748	GPNMB	glycoprotein (transmembrane) nmb	Source:HGNC Symbol;Acc:HGNC:4462]	4	-10.247	3.47857	7.56997	3.32327e-06	5.59159e-05	4.83559
ENSOARG00000003184	NUPR1	nuclear protein, transcriptional regulator, 1	Source:HGNC Symbol;Acc:HGNC:29990]	24	-4.53349	5.13938	7.56311	3.35673e-06	5.64074e-05	4.82026
ENSOARG00000008209	FNBP1	formin binding protein 1	Source:HGNC Symbol;Acc:HGNC:17069]	3	2.29226	9.62021	-7.55861	3.37885e-06	5.67076e-05	4.79886
ENSOARG00000002788	ATP6V0A2	ATPase, H+ transporting, lysosomal V0 subunit a2	Source:HGNC Symbol;Acc:HGNC:18481]	17	-3.27893	4.46411	7.55435	3.39993e-06	5.69895e-05	4.82308
ENSOARG00000020418	MAPKBP1	mitogen-activated protein kinase binding protein 1	Source:HGNC Symbol;Acc:HGNC:29536]	7	-4.03007	5.46606	7.55258	3.40877e-06	5.70658e-05	4.79599
ENSOARG00000004437	GNA12	guanine nucleotide binding protein (G protein) alpha 12	Source:HGNC Symbol;Acc:HGNC:4380]	24	3.82838	3.615	-7.54994	3.42193e-06	5.72142e-05	4.82525
ENSOARG00000002234	SLC2A3	Ovis aries solute carrier family 2 (facilitated glucose transporter), member 3 (SLC2A3), mRNA.	Source:RefSeq mRNA;Acc:NM_001009770]	3	-4.2934	11.6332	7.54878	3.42776e-06	5.72396e-05	4.78829
ENSOARG00000007205	SS18	synovial sarcoma translocation, chromosome 18	Source:HGNC Symbol;Acc:HGNC:11340]	23	3.08723	7.8865	-7.54672	3.43811e-06	5.73405e-05	4.77699
ENSOARG00000009072	RNF139	ring finger protein 139	Source:HGNC Symbol;Acc:HGNC:17023]	9	2.87967	6.33015	-7.54351	3.45428e-06	5.74753e-05	4.76867
ENSOARG00000019330	SLC35A5	solute carrier family 35, member A5	Source:HGNC Symbol;Acc:HGNC:20792]	1	-3.73593	3.96503	7.5434	3.45482e-06	5.74753e-05	4.81611
ENSOARG00000013186	SYNCRIP	synaptotagmin binding, cytoplasmic RNA interacting protein	Source:HGNC Symbol;Acc:HGNC:16918]	8	3.74841	7.76142	-7.53806	3.48191e-06	5.78537e-05	4.7638
ENSOARG00000017574	POLA1	polymerase (DNA directed), alpha 1, catalytic subunit	Source:HGNC Symbol;Acc:HGNC:9173]	X	-3.15689	4.65004	7.53713	3.48666e-06	5.78604e-05	4.79333
ENSOARG00000019357		Uncharacterized protein	Source:UniProtKB/TrEMBL;Acc:W5QDJ5]	1	-4.87211	3.36485	7.53393	3.50304e-06	5.80597e-05	4.7971
ENSOARG00000002508	TPRN	taperin	Source:HGNC Symbol;Acc:HGNC:26894]	3	5.50282	4.6033	-7.53094	3.5184e-06	5.82269e-05	4.78916
ENSOARG00000015053	CCBL2	cysteine conjugate-beta lyase 2	Source:HGNC Symbol;Acc:HGNC:33238]	1	-4.59377	2.87461	7.52872	3.52988e-06	5.82269e-05	4.76652
ENSOARG00000011823	APBA3	amyloid beta (A4) precursor protein-binding, family A, member 3	Source:HGNC Symbol;Acc:HGNC:580]	5	-4.76501	4.39495	7.52933	3.52672e-06	5.82269e-05	4.79008
ENSOARG00000021004	GALK2	galactokinase 2	Source:HGNC Symbol;Acc:HGNC:4119]	7	-6.64797	2.54703	7.52857	3.53063e-06	5.82269e-05	4.72567
ENSOARG00000008878	CD84	CD84 molecule	Source:HGNC Symbol;Acc:HGNC:1704]	1	3.55019	4.38322	-7.52565	3.5458e-06	5.83326e-05	4.78361
ENSOARG00000012350	MTHFD2	methylenetetrahydrofolate dehydrogenase (NADP+ dependent) 2, methenyltetrahydrofolate cyclohydrolase	Source:HGNC Symbol;Acc:HGNC:7434]	3	-4.03333	2.72054	7.52589	3.54453e-06	5.83326e-05	4.75199
ENSOARG00000000826	COQ6	coenzyme Q6 monooxygenase	Source:HGNC Symbol;Acc:HGNC:20233]	7	-4.18847	3.24607	7.51821	3.58468e-06	5.88993e-05	4.773
ENSOARG00000019864	MIOX	myo-inositol oxygenase	Source:HGNC Symbol;Acc:HGNC:14522]	3	5.00874	2.38562	-7.51162	3.61946e-06	5.90395e-05	4.6972
ENSOARG00000010339	CCDC94	coiled-coil domain containing 94	Source:HGNC Symbol;Acc:HGNC:25518]	5	3.39106	5.3	-7.51456	3.60389e-06	5.90395e-05	4.7431
ENSOARG00000002281	RNF44	ring finger protein 44	Source:HGNC Symbol;Acc:HGNC:19180]	5	2.48817	4.80324	-7.51406	3.60655e-06	5.90395e-05	4.75542
ENSOARG00000012844	REXO1	REX1, RNA exonuclease 1 homolog (S. cerevisiae)	Source:HGNC Symbol;Acc:HGNC:24616]	5	2.29511	6.63042	-7.51313	3.61144e-06	5.90395e-05	4.72302
ENSOARG00000000089	GTF3C1	general transcription factor IIIC, polypeptide 1, alpha 220kDa	Source:HGNC Symbol;Acc:HGNC:4664]	24	-2.45361	5.56843	7.51177	3.61866e-06	5.90395e-05	4.73147
ENSOARG00000018829	BBX	bobby sox homolog (Drosophila)	Source:HGNC Symbol;Acc:HGNC:14422]	1	-2.94673	4.38708	7.51155	3.61983e-06	5.90395e-05	4.76324
ENSOARG00000006753	CBLL1	Cbl proto-oncogene-like 1, E3 ubiquitin protein ligase	Source:HGNC Symbol;Acc:HGNC:21225]	4	2.68849	5.84782	-7.50884	3.63425e-06	5.92022e-05	4.72229
ENSOARG00000013165				21	2.99575	4.77129	-7.50741	3.6419e-06	5.92544e-05	4.74706
ENSOARG00000010926	WDR4	WD repeat domain 4	Source:HGNC Symbol;Acc:HGNC:12756]	1	4.43811	4.20355	-7.50462	3.65686e-06	5.92804e-05	4.75798
ENSOARG00000004714	NRF1	nuclear respiratory factor 1	Source:HGNC Symbol;Acc:HGNC:7996]	4	2.28331	5.60646	-7.50478	3.65596e-06	5.92804e-05	4.72011
ENSOARG00000011440	GPATCH2	G patch domain containing 2	Source:HGNC Symbol;Acc:HGNC:25499]	12	-3.23578	3.96278	7.50569	3.65111e-06	5.92804e-05	4.76213
ENSOARG00000011688	NOC4L	nucleolar complex associated 4 homolog (S. cerevisiae)	Source:HGNC Symbol;Acc:HGNC:28461]	17	3.78043	4.34336	-7.50287	3.66623e-06	5.93238e-05	4.75221
ENSOARG00000003538	CYTH1	cytohesin 1	Source:HGNC Symbol;Acc:HGNC:9501]	11	2.81252	8.95463	-7.50246	3.66845e-06	5.93238e-05	4.71546
ENSOARG00000005554	C16orf72	chromosome 16 open reading frame 72	Source:HGNC Symbol;Acc:HGNC:30103]	24	3.05013	5.12905	-7.4993	3.68553e-06	5.95276e-05	4.72507
ENSOARG00000012323	ACAP1	ArfGAP with coiled-coil, ankyrin repeat and PH domains 1	Source:HGNC Symbol;Acc:HGNC:16467]	11	3.37213	6.97884	-7.49236	3.72326e-06	5.99913e-05	4.69355
ENSOARG00000002409	GFM1	G elongation factor, mitochondrial 1	Source:HGNC Symbol;Acc:HGNC:13780]	1	-2.99287	3.57552	7.49258	3.72207e-06	5.99913e-05	4.74433
ENSOARG00000014228	RBM18	RNA binding motif protein 18	Source:HGNC Symbol;Acc:HGNC:28413]	3	2.93624	5.47772	-7.4871	3.75217e-06	6.03112e-05	4.69774
ENSOARG00000018057	RLIM	ring finger protein, LIM domain interacting	Source:HGNC Symbol;Acc:HGNC:13429]	X	2.57831	6.04254	-7.48753	3.74979e-06	6.03112e-05	4.68812
ENSOARG00000001322	FBXO22	F-box protein 22	Source:HGNC Symbol;Acc:HGNC:13593]	18	-5.17502	2.3717	7.48093	3.78637e-06	6.07874e-05	4.65192
ENSOARG00000003616	PAFAH1B2	platelet-activating factor acetylhydrolase 1b, catalytic subunit 2 (30kDa)	Source:HGNC Symbol;Acc:HGNC:8575]	15	3.274	4.68089	-7.47532	3.81775e-06	6.12173e-05	4.7035
ENSOARG00000011779	TRAF5	TNF receptor-associated factor 5	Source:HGNC Symbol;Acc:HGNC:12035]	12	5.77832	6.65364	-7.4708	3.84325e-06	6.15521e-05	4.66415
ENSOARG00000013237		Uncharacterized protein	Source:UniProtKB/TrEMBL;Acc:W5PUQ0]	5	4.35475	2.83191	-7.46688	3.86548e-06	6.18337e-05	4.6803
ENSOARG00000010757	AUTS2	autism susceptibility candidate 2	Source:HGNC Symbol;Acc:HGNC:14262]	24	7.35725	0.238561	-7.46237	3.89126e-06	6.20219e-05	3.91006
ENSOARG00000008061				16	4.45702	5.01288	-7.46225	3.89194e-06	6.20219e-05	4.68031
ENSOARG00000014364	PIM1	Ovis aries pim-1 oncogene (PIM1), mRNA.	Source:RefSeq mRNA;Acc:NM_001146090]	20	-5.15008	6.67504	7.46156	3.89588e-06	6.20219e-05	4.64922
ENSOARG00000018806	WBP2NL	WBP2 N-terminal like	Source:HGNC Symbol;Acc:HGNC:28389]	3	-17.9379	-1.76513	7.46179	3.89455e-06	6.20219e-05	2.44521
ENSOARG00000016526	AAAS	achalasia, adrenocortical insufficiency, alacrimia	Source:HGNC Symbol;Acc:HGNC:13666]	3	-4.02877	3.96813	7.46074	3.9006e-06	6.20227e-05	4.69817
ENSOARG00000020780	USP3	ubiquitin specific peptidase 3	Source:HGNC Symbol;Acc:HGNC:12626]	7	2.20457	5.52194	-7.4548	3.93491e-06	6.24192e-05	4.64864
ENSOARG00000020951	HDAC1	Histone deacetylase	Source:UniProtKB/TrEMBL;Acc:W5QIG5]	2	-2.809	7.1755	7.45509	3.93322e-06	6.24192e-05	4.63913
ENSOARG00000012526	SLC25A28	solute carrier family 25 (mitochondrial iron transporter), member 28	Source:HGNC Symbol;Acc:HGNC:23472]	22	2.899	5.57379	-7.45188	3.95185e-06	6.26134e-05	4.6438
ENSOARG00000017411	CSRNP2	cysteine-serine-rich nuclear protein 2	Source:HGNC Symbol;Acc:HGNC:16006]	3	3.43654	4.64222	-7.44265	4.00603e-06	6.2873e-05	4.65663
ENSOARG00000017417	RRS1	RRS1 ribosome biogenesis regulator homolog (S. cerevisiae)	Source:HGNC Symbol;Acc:HGNC:17083]	9	3.33195	4.60697	-7.44447	3.99533e-06	6.2873e-05	4.66069
ENSOARG00000004724		Uncharacterized protein	Source:UniProtKB/TrEMBL;Acc:W5P3R0]	3	2.92301	4.69019	-7.44316	4.00305e-06	6.2873e-05	4.65601
ENSOARG00000005558	PKN1	protein kinase N1	Source:HGNC Symbol;Acc:HGNC:9405]	5	2.4222	7.7934	-7.44827	3.97299e-06	6.2873e-05	4.63191
ENSOARG00000014976	POLG2	polymerase (DNA directed), gamma 2, accessory subunit	Source:HGNC Symbol;Acc:HGNC:9180]	11	-2.74549	4.43094	7.44397	3.99822e-06	6.2873e-05	4.66373
ENSOARG00000020959	TMOD3	tropomodulin 3 (ubiquitous)	Source:HGNC Symbol;Acc:HGNC:11873]	7	-3.41645	6.14904	7.44464	3.99427e-06	6.2873e-05	4.62482
ENSOARG00000016209	GLMN	glomulin, FKBP associated protein	Source:HGNC Symbol;Acc:HGNC:14373]	1	-3.70686	2.86822	7.44451	3.99508e-06	6.2873e-05	4.65406
ENSOARG00000006094	TNFRSF11A	tumor necrosis factor receptor superfamily, member 11a, NFKB activator	Source:HGNC Symbol;Acc:HGNC:11908]	23	-10.2091	0.0987987	7.44272	4.0056e-06	6.2873e-05	3.69974
ENSOARG00000015025	CBL	Cbl proto-oncogene, E3 ubiquitin protein ligase	Source:HGNC Symbol;Acc:HGNC:1541]	15	-3.97145	4.00682	7.44017	4.02074e-06	6.30294e-05	4.66814
ENSOARG00000011083	IL23R	interleukin 23 receptor	Source:HGNC Symbol;Acc:HGNC:19100]	1	-11.4384	-0.966944	7.43594	4.04593e-06	6.33498e-05	2.95252
ENSOARG00000017790		Uncharacterized protein	Source:UniProtKB/TrEMBL;Acc:W5Q8P8]	3	-2.96873	3.44884	7.435	4.05154e-06	6.33631e-05	4.66158
ENSOARG00000003479	TANGO6	transport and golgi organization 6 homolog (Drosophila)	Source:HGNC Symbol;Acc:HGNC:25749]	14	-3.93508	2.76148	7.43385	4.05844e-06	6.33964e-05	4.63152
ENSOARG00000014961	ZNF217	zinc finger protein 217	Source:HGNC Symbol;Acc:HGNC:13009]	13	-3.11577	4.32899	7.43194	4.06991e-06	6.3501e-05	4.64924
ENSOARG00000019796		Uncharacterized protein	Source:UniProtKB/TrEMBL;Acc:W5QEW2]	7	-5.47279	1.14449	7.4275	4.09668e-06	6.38439e-05	4.31324
ENSOARG00000016504	KRI1	KRI1 homolog (S. cerevisiae)	Source:HGNC Symbol;Acc:HGNC:25769]	5	3.82679	7.09924	-7.42619	4.10459e-06	6.38924e-05	4.59647
ENSOARG00000011668	SBF2	SET binding factor 2	Source:HGNC Symbol;Acc:HGNC:2135]	15	4.27744	2.72721	-7.41712	4.16004e-06	6.46799e-05	4.60391
ENSOARG00000003547	MYBL2	v-myb avian myeloblastosis viral oncogene homolog-like 2	Source:HGNC Symbol;Acc:HGNC:7548]	13	4.34597	6.07165	-7.41136	4.19561e-06	6.4706e-05	4.57817
ENSOARG00000012666	JARID2	jumonji, AT rich interactive domain 2	Source:HGNC Symbol;Acc:HGNC:6196]	20	3.44051	7.69772	-7.41101	4.19776e-06	6.4706e-05	4.57635
ENSOARG00000014849	NEDD9	neural precursor cell expressed, developmentally down-regulated 9	Source:HGNC Symbol;Acc:HGNC:7733]	20	3.04848	7.82805	-7.40977	4.20548e-06	6.4706e-05	4.57506
ENSOARG00000005562	PCF11	PCF11 cleavage and polyadenylation factor subunit	Source:HGNC Symbol;Acc:HGNC:30097]	21	2.77346	7.59048	-7.41172	4.19338e-06	6.4706e-05	4.57688
ENSOARG00000009006	NSRP1	nuclear speckle splicing regulatory protein 1	Source:HGNC Symbol;Acc:HGNC:25305]	11	-2.74317	5.96807	7.41191	4.19222e-06	6.4706e-05	4.57761
ENSOARG00000001510	KIAA0753	KIAA0753	Source:HGNC Symbol;Acc:HGNC:29110]	11	-3.33268	2.96055	7.4104	4.20159e-06	6.4706e-05	4.61231
ENSOARG00000019424	SLC7A7	solute carrier family 7 (amino acid transporter light chain, y+L system), member 7	Source:HGNC Symbol;Acc:HGNC:11065]	7	-3.37872	4.93057	7.40981	4.20523e-06	6.4706e-05	4.60015
ENSOARG00000005526	MCFD2	multiple coagulation factor deficiency 2	Source:HGNC Symbol;Acc:HGNC:18451]	3	-4.75867	4.77856	7.41132	4.19585e-06	6.4706e-05	4.60874
ENSOARG00000019616	TIGIT	T cell immunoreceptor with Ig and ITIM domains	Source:HGNC Symbol;Acc:HGNC:26838]	1	-5.62123	1.8122	7.41168	4.19363e-06	6.4706e-05	4.46205
ENSOARG00000015943	CDC7	cell division cycle 7	Source:HGNC Symbol;Acc:HGNC:1745]	1	-5.90292	2.60427	7.40746	4.2199e-06	6.4853e-05	4.57512
ENSOARG00000013622	C17orf80	chromosome 17 open reading frame 80	Source:HGNC Symbol;Acc:HGNC:29601]	11	2.6875	5.14529	-7.40004	4.2665e-06	6.54878e-05	4.57851
ENSOARG00000020108	EHBP1	EH domain binding protein 1	Source:HGNC Symbol;Acc:HGNC:29144]	3	-2.97099	4.66289	7.39932	4.27105e-06	6.54878e-05	4.59245
ENSOARG00000012942	RABEPK	Rab9 effector protein with kelch motifs	Source:HGNC Symbol;Acc:HGNC:16896]	3	-3.68108	6.60784	7.39753	4.28237e-06	6.55858e-05	4.55298
ENSOARG00000010676				24	3.31856	7.58975	-7.39499	4.29857e-06	6.57582e-05	4.55197
ENSOARG00000018685	KCTD5	potassium channel tetramerization domain containing 5	Source:HGNC Symbol;Acc:HGNC:21423]	24	3.8479	4.20627	-7.39346	4.30831e-06	6.58316e-05	4.59683
ENSOARG00000015422	AIFM1	apoptosis-inducing factor, mitochondrion-associated, 1	Source:HGNC Symbol;Acc:HGNC:8768]	X	-4.53443	4.38977	7.39078	4.32547e-06	6.6018e-05	4.58948
ENSOARG00000004778		Uncharacterized protein	Source:UniProtKB/TrEMBL;Acc:W5P3W3]	4	-2.71051	4.7471	7.38619	4.35495e-06	6.63918e-05	4.57015
ENSOARG00000014425	MERTK	MER proto-oncogene, tyrosine kinase	Source:HGNC Symbol;Acc:HGNC:7027]	3	-5.51956	3.31379	7.38151	4.38535e-06	6.67787e-05	4.58023
ENSOARG00000015641		Uncharacterized protein	Source:UniProtKB/TrEMBL;Acc:W5Q242]	21	3.85048	5.25209	-7.37877	4.40319e-06	6.69255e-05	4.54589
ENSOARG00000016392	CLPTM1L	CLPTM1-like	Source:HGNC Symbol;Acc:HGNC:24308]	16	3.36113	6.95663	-7.37848	4.40504e-06	6.69255e-05	4.52493
ENSOARG00000002804	UBR3	ubiquitin protein ligase E3 component n-recognin 3 (putative)	Source:HGNC Symbol;Acc:HGNC:30467]	2	-2.98996	5.06716	7.37674	4.41646e-06	6.70225e-05	4.54666
ENSOARG00000014922	PNOC	prepronociceptin	Source:HGNC Symbol;Acc:HGNC:9163]	2	-3.76018	5.14391	7.3758	4.42264e-06	6.70398e-05	4.54495
ENSOARG00000003481	ARID4B	AT rich interactive domain 4B (RBP1-like)	Source:HGNC Symbol;Acc:HGNC:15550]	25	-2.37449	7.10167	7.37471	4.42977e-06	6.70714e-05	4.5196
ENSOARG00000015942	USP2	ubiquitin specific peptidase 2	Source:HGNC Symbol;Acc:HGNC:12618]	15	6.74458	1.39102	-7.36834	4.47191e-06	6.70988e-05	4.28596
ENSOARG00000005370	TP53TG5	TP53 target 5	Source:HGNC Symbol;Acc:HGNC:15856]	13	4.51341	0.94767	-7.36959	4.46361e-06	6.70988e-05	4.18601
ENSOARG00000002672	USP49	ubiquitin specific peptidase 49	Source:HGNC Symbol;Acc:HGNC:20078]	20	4.46435	3.23897	-7.3724	4.44498e-06	6.70988e-05	4.56705
ENSOARG00000006667	UCK1	uridine-cytidine kinase 1	Source:HGNC Symbol;Acc:HGNC:14859]	3	4.08571	4.07257	-7.36918	4.4663e-06	6.70988e-05	4.56455
ENSOARG00000010971	TGFBR1	transforming growth factor, beta receptor 1	Source:HGNC Symbol;Acc:HGNC:11772]	2	3.15138	4.70732	-7.37108	4.45375e-06	6.70988e-05	4.54991
ENSOARG00000003786	TRMT1L	tRNA methyltransferase 1 homolog (S. cerevisiae)-like	Source:HGNC Symbol;Acc:HGNC:16782]	12	-4.27475	4.66961	7.37301	4.44096e-06	6.70988e-05	4.55533
ENSOARG00000008185	PRIM1	primase, DNA, polypeptide 1 (49kDa)	Source:HGNC Symbol;Acc:HGNC:9369]	3	-4.54952	3.49987	7.37088	4.45508e-06	6.70988e-05	4.5702
ENSOARG00000017390	TFCP2	transcription factor CP2	Source:HGNC Symbol;Acc:HGNC:11748]	3	-5.58457	2.79324	7.36886	4.46842e-06	6.70988e-05	4.53859
ENSOARG00000008781	MRPL45	mitochondrial ribosomal protein L45	Source:HGNC Symbol;Acc:HGNC:16651]	11	-2.84435	4.79514	7.36725	4.47912e-06	6.71313e-05	4.54091
ENSOARG00000013592	LYRM1	LYR motif containing 1	Source:HGNC Symbol;Acc:HGNC:25074]	24	-6.40992	0.465625	7.36158	4.51702e-06	6.76232e-05	3.93085
ENSOARG00000006198	CPT2	carnitine palmitoyltransferase 2	Source:HGNC Symbol;Acc:HGNC:2330]	1	-3.77816	2.75774	7.35844	4.53815e-06	6.78631e-05	4.52679
ENSOARG00000003998	WDR20	WD repeat domain 20	Source:HGNC Symbol;Acc:HGNC:19667]	18	3.53641	5.12123	-7.35485	4.56245e-06	6.815e-05	4.51375
ENSOARG00000018551		Uncharacterized protein	Source:UniProtKB/TrEMBL;Acc:W5QB24]	7	-2.61539	6.30829	7.34786	4.61008e-06	6.87842e-05	4.47903
ENSOARG00000005054	SETD2	SET domain containing 2	Source:HGNC Symbol;Acc:HGNC:18420]	19	2.19904	8.66278	-7.34548	4.62647e-06	6.89515e-05	4.48271
ENSOARG00000003820	NOTCH1	notch 1	Source:HGNC Symbol;Acc:HGNC:7881]	3	4.12446	7.10356	-7.33763	4.68087e-06	6.96063e-05	4.46467
ENSOARG00000003339	RASSF3	Ras association (RalGDS/AF-6) domain family member 3	Source:HGNC Symbol;Acc:HGNC:14271]	3	2.71489	6.21939	-7.33772	4.68022e-06	6.96063e-05	4.46456
ENSOARG00000004854		Uncharacterized protein	Source:UniProtKB/TrEMBL;Acc:W5P452]	20	-3.03833	5.90533	7.3314	4.72448e-06	7.01765e-05	4.45925
ENSOARG00000003320	FAM76A	family with sequence similarity 76, member A	Source:HGNC Symbol;Acc:HGNC:28530]	2	2.78878	4.55881	-7.32769	4.75064e-06	7.04864e-05	4.49005
ENSOARG00000009155	CCBL1	cysteine conjugate-beta lyase, cytoplasmic	Source:HGNC Symbol;Acc:HGNC:1564]	3	2.38365	5.38623	-7.32381	4.77825e-06	7.08171e-05	4.45872
ENSOARG00000005371	ST3GAL1	ST3 beta-galactoside alpha-2,3-sialyltransferase 1	Source:HGNC Symbol;Acc:HGNC:10862]	9	3.73404	6.72577	-7.31831	4.81757e-06	7.13204e-05	4.43475
ENSOARG00000010883	OSTM1	osteopetrosis associated transmembrane protein 1	Source:HGNC Symbol;Acc:HGNC:21652]	8	-3.65303	3.77664	7.3174	4.8241e-06	7.13377e-05	4.49325
ENSOARG00000015763	USO1	USO1 vesicle transport factor	Source:HGNC Symbol;Acc:HGNC:30904]	6	-3.56386	6.01428	7.31569	4.83642e-06	7.14406e-05	4.43514
ENSOARG00000020892	SLC20A1	solute carrier family 20 (phosphate transporter), member 1	Source:HGNC Symbol;Acc:HGNC:10946]	3	3.643	7.83504	-7.31489	4.84222e-06	7.1447e-05	4.43386
ENSOARG00000006276	NARS2	asparaginyl-tRNA synthetase 2, mitochondrial (putative)	Source:HGNC Symbol;Acc:HGNC:26274]	21	-4.28791	2.56462	7.30427	4.91955e-06	7.25075e-05	4.43585
ENSOARG00000012843	TMEM138	transmembrane protein 138	Source:HGNC Symbol;Acc:HGNC:26944]	21	-4.82313	1.25536	7.30319	4.92751e-06	7.25445e-05	4.19925
ENSOARG00000011712	SMYD5	SMYD family member 5	Source:HGNC Symbol;Acc:HGNC:16258]	3	3.08719	3.88122	-7.30204	4.93601e-06	7.25894e-05	4.46951
ENSOARG00000008716	CPEB2	cytoplasmic polyadenylation element binding protein 2	Source:HGNC Symbol;Acc:HGNC:21745]	6	5.13011	5.33329	-7.29943	4.95526e-06	7.27117e-05	4.42824
ENSOARG00000011761	NAALADL1	N-acetylated alpha-linked acidic dipeptidase-like 1	Source:HGNC Symbol;Acc:HGNC:23536]	21	2.73548	4.97145	-7.29961	4.95397e-06	7.27117e-05	4.43552
ENSOARG00000008270	C16orf46	chromosome 16 open reading frame 46	Source:HGNC Symbol;Acc:HGNC:26525]	14	-8.1363	-0.83861	7.29868	4.9608e-06	7.27129e-05	3.01868
ENSOARG00000000216	ACTR5	ARP5 actin-related protein 5 homolog (yeast)	Source:HGNC Symbol;Acc:HGNC:14671]	13	3.15347	4.41649	-7.29668	4.97569e-06	7.28508e-05	4.44904
ENSOARG00000007727	BFAR	bifunctional apoptosis regulator	Source:HGNC Symbol;Acc:HGNC:17613]	24	2.67895	6.3271	-7.29044	5.02227e-06	7.33787e-05	4.39322
ENSOARG00000010809	DVL2	dishevelled segment polarity protein 2	Source:HGNC Symbol;Acc:HGNC:3086]	11	-3.56843	3.31634	7.29038	5.02277e-06	7.33787e-05	4.45299
ENSOARG00000005142	TBP	Uncharacterized protein	Source:UniProtKB/TrEMBL;Acc:W5P509]	8	2.35951	4.48641	-7.28637	5.05297e-06	7.3739e-05	4.43081
ENSOARG00000013083	ZNF622	zinc finger protein 622	Source:HGNC Symbol;Acc:HGNC:30958]	16	2.44046	5.93476	-7.28555	5.05916e-06	7.37485e-05	4.38936
ENSOARG00000020776	PLBD1	phospholipase B domain containing 1	Source:HGNC Symbol;Acc:HGNC:26215]	3	5.63767	5.29785	-7.28014	5.1003e-06	7.40359e-05	4.40384
ENSOARG00000004596	YWHAZ	Uncharacterized protein	Source:UniProtKB/TrEMBL;Acc:W5P3B5]	13	3.059	8.29024	-7.2793	5.10669e-06	7.40359e-05	4.3825
ENSOARG00000011163	TIMM22	translocase of inner mitochondrial membrane 22 homolog (yeast)	Source:HGNC Symbol;Acc:HGNC:17317]	11	2.91563	3.52246	-7.28031	5.09897e-06	7.40359e-05	4.4406
ENSOARG00000017821	CLPX	caseinolytic mitochondrial matrix peptidase chaperone subunit	Source:HGNC Symbol;Acc:HGNC:2088]	7	-3.39893	5.44921	7.2794	5.10591e-06	7.40359e-05	4.39202
ENSOARG00000016778	POLK	polymerase (DNA directed) kappa	Source:HGNC Symbol;Acc:HGNC:9183]	7	-4.12941	2.91321	7.28052	5.09738e-06	7.40359e-05	4.42637
ENSOARG00000004716	TIMM21	translocase of inner mitochondrial membrane 21 homolog (yeast)	Source:HGNC Symbol;Acc:HGNC:25010]	23	-4.45932	2.05477	7.27683	5.12562e-06	7.41795e-05	4.34029
ENSOARG00000011185	AVPI1	arginine vasopressin-induced 1	Source:HGNC Symbol;Acc:HGNC:30898]	22	-7.53763	1.59166	7.27655	5.12774e-06	7.41795e-05	4.21213
ENSOARG00000011707	NOL9	nucleolar protein 9	Source:HGNC Symbol;Acc:HGNC:26265]	12	4.5704	3.87806	-7.27228	5.16064e-06	7.45744e-05	4.42705
ENSOARG00000018259	HIST1H2BN	histone cluster 1, H2bn	Source:HGNC Symbol;Acc:HGNC:4749]	20	-2.69384	4.54823	7.26718	5.2002e-06	7.50645e-05	4.40088
ENSOARG00000019555		Uncharacterized protein	Source:UniProtKB/TrEMBL;Acc:W5QE56]	7	-5.72234	0.112999	7.26086	5.24971e-06	7.5697e-05	3.65482
ENSOARG00000001246	AREL1	apoptosis resistant E3 ubiquitin protein ligase 1	Source:HGNC Symbol;Acc:HGNC:20363]	7	-3.12653	4.62503	7.25345	5.30836e-06	7.64599e-05	4.37893
ENSOARG00000002999	ZNF32	zinc finger protein 32	Source:HGNC Symbol;Acc:HGNC:13095]	25	-4.33516	3.20023	7.24951	5.33984e-06	7.68303e-05	4.39189
ENSOARG00000011870	PUS3	pseudouridylate synthase 3	Source:HGNC Symbol;Acc:HGNC:25461]	21	-2.54665	5.06715	7.24784	5.3532e-06	7.69392e-05	4.35485
ENSOARG00000016958				3	3.472	7.00038	-7.24441	5.38081e-06	7.71694e-05	4.3244
ENSOARG00000009897	UFM1	ubiquitin-fold modifier 1	Source:HGNC Symbol;Acc:HGNC:20597]	10	2.65931	7.47102	-7.24463	5.37906e-06	7.71694e-05	4.32668
ENSOARG00000007953	TMEM184C	transmembrane protein 184C	Source:HGNC Symbol;Acc:HGNC:25587]	17	-2.92863	4.31545	7.23698	5.44116e-06	7.7951e-05	4.36375
ENSOARG00000015319	KLF11	Kruppel-like factor 11	Source:HGNC Symbol;Acc:HGNC:11811]	3	7.37562	4.51086	-7.2355	5.45334e-06	7.80414e-05	4.36392
ENSOARG00000018810	CEP120	centrosomal protein 120kDa	Source:HGNC Symbol;Acc:HGNC:26690]	5	-2.91946	5.70227	7.23137	5.48722e-06	7.8442e-05	4.31278
ENSOARG00000019624	RQCD1	RCD1 required for cell differentiation1 homolog (S. pombe)	Source:HGNC Symbol;Acc:HGNC:10445]	2	2.94976	5.62103	-7.23038	5.49541e-06	7.84747e-05	4.31343
ENSOARG00000003047	DKC1	Ovis aries dyskeratosis congenita 1, dyskerin (DKC1), mRNA.	Source:RefSeq mRNA;Acc:NM_001142513]	X	2.54836	7.58236	-7.22329	5.55429e-06	7.92305e-05	4.29509
ENSOARG00000020721	PIF1	PIF1 5'-to-3' DNA helicase	Source:HGNC Symbol;Acc:HGNC:26220]	7	-11.1561	-1.65404	7.22026	5.57967e-06	7.95073e-05	2.3519
ENSOARG00000006470	NOP56	NOP56 ribonucleoprotein	Source:HGNC Symbol;Acc:HGNC:15911]	13	3.82983	8.33903	-7.21899	5.59034e-06	7.95717e-05	4.29188
ENSOARG00000001356	GIMAP6	GTPase, IMAP family member 6	Source:HGNC Symbol;Acc:HGNC:21918]	4	-4.938	3.93591	7.2183	5.59615e-06	7.95717e-05	4.34763
ENSOARG00000002549		Uncharacterized protein	Source:UniProtKB/TrEMBL;Acc:W5NX10]	JH921724.1	-5.38246	2.30317	7.2123	5.64687e-06	8.02073e-05	4.27766
ENSOARG00000018773	BMP2K	BMP2 inducible kinase	Source:HGNC Symbol;Acc:HGNC:18041]	6	-3.33391	4.54405	7.21005	5.66607e-06	8.03942e-05	4.31717
ENSOARG00000001527	POT1	protection of telomeres 1	Source:HGNC Symbol;Acc:HGNC:17284]	4	-3.74361	4.39571	7.20779	5.68538e-06	8.05822e-05	4.31887
ENSOARG00000007209	CTSF	Uncharacterized protein	Source:UniProtKB/TrEMBL;Acc:W5PBB5]	21	4.168	3.32883	-7.20536	5.70624e-06	8.07408e-05	4.33088
ENSOARG00000001099	NELFB	negative elongation factor complex member B	Source:HGNC Symbol;Acc:HGNC:24324]	3	2.7754	5.02412	-7.20507	5.7087e-06	8.07408e-05	4.29231
ENSOARG00000015437	TSR1	TSR1, 20S rRNA accumulation, homolog (S. cerevisiae)	Source:HGNC Symbol;Acc:HGNC:25542]	11	3.13205	6.41068	-7.20331	5.72384e-06	8.0869e-05	4.26217
ENSOARG00000015042	NSUN2	NOP2/Sun RNA methyltransferase family, member 2	Source:HGNC Symbol;Acc:HGNC:25994]	16	2.56768	5.77897	-7.19841	5.7663e-06	8.13058e-05	4.26116
ENSOARG00000008888	PCM1	pericentriolar material 1	Source:HGNC Symbol;Acc:HGNC:8727]	26	-2.21708	6.31014	7.19833	5.76697e-06	8.13058e-05	4.25398
ENSOARG00000010973	OSGIN2	oxidative stress induced growth inhibitor family member 2	Source:HGNC Symbol;Acc:HGNC:1355]	9	2.69173	4.79321	-7.19674	5.78084e-06	8.13861e-05	4.28785
ENSOARG00000017329	ENAH	enabled homolog (Drosophila)	Source:HGNC Symbol;Acc:HGNC:18271]	12	-8.66833	0.216595	7.19627	5.7849e-06	8.13861e-05	3.54538
ENSOARG00000010838	DGKA	diacylglycerol kinase, alpha 80kDa	Source:HGNC Symbol;Acc:HGNC:2849]	3	2.54954	6.25769	-7.19499	5.79605e-06	8.14568e-05	4.24985
ENSOARG00000000491	SRRM2	serine/arginine repetitive matrix 2	Source:HGNC Symbol;Acc:HGNC:16639]	24	2.37442	10.0822	-7.19092	5.83175e-06	8.18722e-05	4.25396
ENSOARG00000005346	SCFD1	sec1 family domain containing 1	Source:HGNC Symbol;Acc:HGNC:20726]	18	-3.41631	4.37008	7.18555	5.87917e-06	8.24508e-05	4.28634
ENSOARG00000019632	RAP1A	RAP1A, member of RAS oncogene family	Source:HGNC Symbol;Acc:HGNC:9855]	1	-2.17527	6.98329	7.18437	5.88965e-06	8.25109e-05	4.23324
ENSOARG00000018064	SH2B3	SH2B adaptor protein 3	Source:HGNC Symbol;Acc:HGNC:29605]	17	4.55601	4.8623	-7.17673	5.95792e-06	8.33796e-05	4.25884
ENSOARG00000003068				15	-2.71575	5.95497	7.17354	5.98669e-06	8.36941e-05	4.22027
ENSOARG00000019813	C1orf109	chromosome 1 open reading frame 109	Source:HGNC Symbol;Acc:HGNC:26039]	1	-6.52463	0.357584	7.17089	6.01074e-06	8.39422e-05	3.66381
ENSOARG00000008771	SRSF7	serine/arginine-rich splicing factor 7	Source:HGNC Symbol;Acc:HGNC:10789]	3	2.60924	8.63295	-7.17015	6.01751e-06	8.39486e-05	4.21926
ENSOARG00000020601	POLR1A	polymerase (RNA) I polypeptide A, 194kDa	Source:HGNC Symbol;Acc:HGNC:17264]	3	-2.64308	5.64906	7.16272	6.08536e-06	8.47176e-05	4.21025
ENSOARG00000019385	ZNF512	zinc finger protein 512	Source:HGNC Symbol;Acc:HGNC:29380]	3	-3.46157	3.35067	7.16318	6.08121e-06	8.47176e-05	4.27021
ENSOARG00000000903	ANKRD46	ankyrin repeat domain 46	Source:HGNC Symbol;Acc:HGNC:27229]	9	-5.47484	1.92117	7.15867	6.12278e-06	8.51495e-05	4.15439
ENSOARG00000005395		Uncharacterized protein	Source:UniProtKB/TrEMBL;Acc:W5P5T7]	1	-4.22037	3.97802	7.1572	6.13637e-06	8.52494e-05	4.25657
ENSOARG00000017157	LBR	lamin B receptor	Source:HGNC Symbol;Acc:HGNC:6518]	12	2.28468	7.4432	-7.15645	6.14341e-06	8.52582e-05	4.19318
ENSOARG00000019297		Uncharacterized protein	Source:UniProtKB/TrEMBL;Acc:W5QDD0]	1	4.99429	3.87099	-7.15274	6.17796e-06	8.54866e-05	4.25299
ENSOARG00000002732	PANK3	pantothenate kinase 3	Source:HGNC Symbol;Acc:HGNC:19365]	16	2.81884	6.18814	-7.15193	6.18556e-06	8.54866e-05	4.18505
ENSOARG00000011288	TLR7	Ovis aries toll-like receptor 7 (TLR7), mRNA.	Source:RefSeq mRNA;Acc:NM_001135059]	X	-4.48601	4.07412	7.15203	6.18456e-06	8.54866e-05	4.24649
ENSOARG00000016654	LYRM7	LYR motif containing 7	Source:HGNC Symbol;Acc:HGNC:28072]	5	-7.48545	-0.0868168	7.15217	6.18325e-06	8.54866e-05	3.38799
ENSOARG00000001087	SRRD	SRR1 domain containing	Source:HGNC Symbol;Acc:HGNC:33910]	17	3.4556	5.25657	-7.15009	6.20279e-06	8.55533e-05	4.20282
ENSOARG00000017319	SNRNP48	small nuclear ribonucleoprotein 48kDa (U11/U12)	Source:HGNC Symbol;Acc:HGNC:21368]	20	2.8828	5.42411	-7.15004	6.20324e-06	8.55533e-05	4.19708
ENSOARG00000006817		Uncharacterized protein	Source:UniProtKB/TrEMBL;Acc:W5PA44]	1	2.42781	5.43448	-7.14928	6.21039e-06	8.55632e-05	4.19472
ENSOARG00000019503	CAPRIN2	caprin family member 2	Source:HGNC Symbol;Acc:HGNC:21259]	3	3.36048	2.90847	-7.14709	6.23098e-06	8.56143e-05	4.2379
ENSOARG00000012204	STAU1	staufen double-stranded RNA binding protein 1	Source:HGNC Symbol;Acc:HGNC:11370]	13	2.99135	7.58497	-7.14751	6.22699e-06	8.56143e-05	4.18039
ENSOARG00000005616	UBE2J2	ubiquitin-conjugating enzyme E2, J2	Source:HGNC Symbol;Acc:HGNC:19268]	12	2.83777	5.22421	-7.14681	6.23366e-06	8.56143e-05	4.19817
ENSOARG00000009064	IKZF5	IKAROS family zinc finger 5 (Pegasus)	Source:HGNC Symbol;Acc:HGNC:14283]	22	2.77793	5.19947	-7.14615	6.23983e-06	8.56143e-05	4.19774
ENSOARG00000003263	FAM129A	family with sequence similarity 129, member A	Source:HGNC Symbol;Acc:HGNC:16784]	12	-3.6789	5.57405	7.13618	6.33474e-06	8.68271e-05	4.17318
ENSOARG00000012625	PITPNM1	phosphatidylinositol transfer protein, membrane-associated 1	Source:HGNC Symbol;Acc:HGNC:9003]	21	4.80061	8.58297	-7.13128	6.38201e-06	8.73445e-05	4.15972
ENSOARG00000016817		Uncharacterized protein	Source:UniProtKB/TrEMBL;Acc:W5Q5S5]	21	-2.73993	7.51968	7.13091	6.38562e-06	8.73445e-05	4.15478
ENSOARG00000013713	SEMA4C	sema domain, immunoglobulin domain (Ig), transmembrane domain (TM) and short cytoplasmic domain, (semaphorin) 4C	Source:HGNC Symbol;Acc:HGNC:10731]	3	6.70855	1.83067	-7.12839	6.41001e-06	8.75882e-05	4.08078
ENSOARG00000019678	IRAK4	Ovis aries interleukin-1 receptor-associated kinase 4 (IRAK4), mRNA.	Source:RefSeq mRNA;Acc:NM_001142514]	3	-3.18447	4.14597	7.12594	6.43388e-06	8.78241e-05	4.20393
ENSOARG00000008976	FABP5	Ovis aries fatty acid binding protein 5 (psoriasis-associated) (FABP5), mRNA.	Source:RefSeq mRNA;Acc:NM_001145180]	9	-3.32237	4.80116	7.12093	6.48295e-06	8.84033e-05	4.175
ENSOARG00000005895	TRMT61A	tRNA methyltransferase 61A	Source:HGNC Symbol;Acc:HGNC:23790]	18	4.20003	2.81749	-7.11985	6.49355e-06	8.84572e-05	4.19287
ENSOARG00000006633	YIPF1	Yip1 domain family, member 1	Source:HGNC Symbol;Acc:HGNC:25231]	1	-5.93831	2.36665	7.11748	6.51699e-06	8.86857e-05	4.14919
ENSOARG00000014392	SMIM3	small integral membrane protein 3	Source:HGNC Symbol;Acc:HGNC:30248]	5	-5.91006	1.38568	7.11629	6.52873e-06	8.87546e-05	3.97953
ENSOARG00000014618		Uncharacterized protein	Source:UniProtKB/TrEMBL;Acc:W5PYZ3]	9	3.06432	5.40338	-7.11427	6.54883e-06	8.89372e-05	4.14335
ENSOARG00000001155	HECA	headcase homolog (Drosophila)	Source:HGNC Symbol;Acc:HGNC:21041]	8	2.9872	6.04726	-7.1128	6.5634e-06	8.90441e-05	4.12736
ENSOARG00000013362		Uncharacterized protein	Source:UniProtKB/TrEMBL;Acc:W5PV45]	8	-3.2771	2.98561	7.11063	6.58515e-06	8.92482e-05	4.18786
ENSOARG00000014089		Uncharacterized protein	Source:UniProtKB/TrEMBL;Acc:W5PXD4]	9	3.03752	4.96096	-7.10633	6.62826e-06	8.97412e-05	4.14608
ENSOARG00000015417	MAPRE1	microtubule-associated protein, RP/EB family, member 1	Source:HGNC Symbol;Acc:HGNC:6890]	1	3.44315	7.40244	-7.10308	6.66102e-06	9.00931e-05	4.11185
ENSOARG00000012200	MPZL1	myelin protein zero-like 1	Source:HGNC Symbol;Acc:HGNC:7226]	1	8.08694	0.591667	-7.09689	6.72399e-06	9.08524e-05	3.64302
ENSOARG00000017370	TCP11L2	t-complex 11, testis-specific-like 2	Source:HGNC Symbol;Acc:HGNC:28627]	3	2.67968	5.57934	-7.09428	6.75072e-06	9.1058e-05	4.10745
ENSOARG00000020455		Uncharacterized protein	Source:UniProtKB/TrEMBL;Acc:W5QGX3]	2	-2.39415	5.01907	7.09407	6.7529e-06	9.1058e-05	4.12498
ENSOARG00000000151	KIAA1715	KIAA1715	Source:HGNC Symbol;Acc:HGNC:21610]	2	-3.23914	4.08043	7.09074	6.78715e-06	9.14273e-05	4.15362
ENSOARG00000018762	CSNK1G3	casein kinase 1, gamma 3	Source:HGNC Symbol;Acc:HGNC:2456]	5	-3.0998	4.86666	7.08913	6.8038e-06	9.15589e-05	4.12353
ENSOARG00000008401	PARP8	poly (ADP-ribose) polymerase family, member 8	Source:HGNC Symbol;Acc:HGNC:26124]	16	-3.18406	4.74695	7.08411	6.85595e-06	9.21675e-05	4.12073
ENSOARG00000003724		Uncharacterized protein	Source:UniProtKB/TrEMBL;Acc:W5P0M2]	14	4.16302	4.81835	-7.08338	6.86359e-06	9.21771e-05	4.11821
ENSOARG00000003102	URB2	URB2 ribosome biogenesis 2 homolog (S. cerevisiae)	Source:HGNC Symbol;Acc:HGNC:28967]	25	3.24115	4.54024	-7.082	6.87805e-06	9.22782e-05	4.12498
ENSOARG00000006626	IRF7	interferon regulatory factor 7	Source:HGNC Symbol;Acc:HGNC:6122]	21	3.10206	5.20654	-7.08005	6.89854e-06	9.23811e-05	4.09829
ENSOARG00000008377	FNDC3A	fibronectin type III domain containing 3A	Source:HGNC Symbol;Acc:HGNC:20296]	10	2.75807	7.13449	-7.07994	6.8996e-06	9.23811e-05	4.07514
ENSOARG00000008370	GPATCH8	G patch domain containing 8	Source:HGNC Symbol;Acc:HGNC:29066]	11	2.50766	7.06352	-7.07556	6.94583e-06	9.29066e-05	4.06799
ENSOARG00000005902	SPOP	speckle-type POZ protein	Source:HGNC Symbol;Acc:HGNC:11254]	11	-2.44143	5.37191	7.07414	6.96089e-06	9.30146e-05	4.08237
ENSOARG00000004174	TAGLN	transgelin	Source:HGNC Symbol;Acc:HGNC:11553]	15	5.59233	1.42111	-7.07085	6.99588e-06	9.32948e-05	3.9271
ENSOARG00000004912	KLHDC3	kelch domain containing 3	Source:HGNC Symbol;Acc:HGNC:20704]	20	-2.72082	5.57075	7.07143	6.9897e-06	9.32948e-05	4.07316
ENSOARG00000004192		Uncharacterized protein	Source:UniProtKB/TrEMBL;Acc:W5P234]	16	4.12004	1.84995	-7.0687	7.01884e-06	9.3393e-05	4.03021
ENSOARG00000013924	ANKRD11	ankyrin repeat domain 11	Source:HGNC Symbol;Acc:HGNC:21316]	14	3.15858	8.80847	-7.06853	7.02058e-06	9.3393e-05	4.0651
ENSOARG00000014298		Uncharacterized protein	Source:UniProtKB/TrEMBL;Acc:W5PY12]	19	3.13542	5.32495	-7.06693	7.03776e-06	9.3393e-05	4.07397
ENSOARG00000016922	CASP8	caspase 8, apoptosis-related cysteine peptidase	Source:HGNC Symbol;Acc:HGNC:1509]	2	-2.31902	6.32087	7.06698	7.0372e-06	9.3393e-05	4.05406
ENSOARG00000011742	HIPK2	homeodomain interacting protein kinase 2	Source:HGNC Symbol;Acc:HGNC:14402]	4	-4.03091	4.03391	7.06688	7.03833e-06	9.3393e-05	4.12002
ENSOARG00000002931	DOCK4	dedicator of cytokinesis 4	Source:HGNC Symbol;Acc:HGNC:19192]	4	-7.30276	1.7663	7.06459	7.06292e-06	9.36259e-05	3.97127
ENSOARG00000013660	ACTR1B	ARP1 actin-related protein 1 homolog B, centractin beta (yeast)	Source:HGNC Symbol;Acc:HGNC:168]	3	3.25709	3.43235	-7.05746	7.14015e-06	9.38522e-05	4.11576
ENSOARG00000000862		Uncharacterized protein	Source:UniProtKB/TrEMBL;Acc:W5NRU6]	14	3.05837	5.38923	-7.06004	7.11203e-06	9.38522e-05	4.06136
ENSOARG00000016235	PUF60	poly-U binding splicing factor 60KDa	Source:HGNC Symbol;Acc:HGNC:17042]	9	2.17462	6.70966	-7.05842	7.12971e-06	9.38522e-05	4.0406
ENSOARG00000009379	PAN2	PAN2 poly(A) specific ribonuclease subunit	Source:HGNC Symbol;Acc:HGNC:20074]	3	-2.91664	5.3229	7.06196	7.09126e-06	9.38522e-05	4.06651
ENSOARG00000012638	BAZ1B	bromodomain adjacent to zinc finger domain, 1B	Source:HGNC Symbol;Acc:HGNC:961]	24	-2.99256	7.16466	7.05715	7.14346e-06	9.38522e-05	4.04049
ENSOARG00000002923	TIPARP	TCDD-inducible poly(ADP-ribose) polymerase	Source:HGNC Symbol;Acc:HGNC:23696]	1	-4.03658	8.32986	7.0601	7.11141e-06	9.38522e-05	4.05046
ENSOARG00000016157		Uncharacterized protein	Source:UniProtKB/TrEMBL;Acc:W5Q3Q5]	3	-4.47965	3.9388	7.05785	7.13588e-06	9.38522e-05	4.11023
ENSOARG00000002589		Uncharacterized protein	Source:UniProtKB/TrEMBL;Acc:W5NX50]	JH922250.1	-4.91744	3.98989	7.05921	7.12106e-06	9.38522e-05	4.11115
ENSOARG00000018628	NFKBIZ	nuclear factor of kappa light polypeptide gene enhancer in B-cells inhibitor, zeta	Source:HGNC Symbol;Acc:HGNC:29805]	1	-5.53476	7.31259	7.05904	7.12294e-06	9.38522e-05	4.04447
ENSOARG00000009409	SNX13	sorting nexin 13	Source:HGNC Symbol;Acc:HGNC:21335]	4	-4.61953	4.43996	7.04682	7.25693e-06	9.51978e-05	4.07792
ENSOARG00000018074	FAM26F	family with sequence similarity 26, member F	Source:HGNC Symbol;Acc:HGNC:33391]	JH924123.1	-6.92883	0.611924	7.04653	7.26018e-06	9.51978e-05	3.61239
ENSOARG00000011703	VPS53	vacuolar protein sorting 53 homolog (S. cerevisiae)	Source:HGNC Symbol;Acc:HGNC:25608]	11	-3.12771	3.65456	7.03831	7.35188e-06	9.63053e-05	4.08528
ENSOARG00000008430	AMICA1	adhesion molecule, interacts with CXADR antigen 1	Source:HGNC Symbol;Acc:HGNC:19084]	15	-4.08359	7.17527	7.03683	7.36859e-06	9.64293e-05	4.00945
ENSOARG00000017794	GBF1	golgi brefeldin A resistant guanine nucleotide exchange factor 1	Source:HGNC Symbol;Acc:HGNC:4181]	22	-2.26044	6.12609	7.03427	7.39745e-06	9.67119e-05	4.00514
ENSOARG00000017425	LETMD1	LETM1 domain containing 1	Source:HGNC Symbol;Acc:HGNC:24241]	3	2.62862	6.05433	-7.03153	7.42846e-06	9.69294e-05	4.00225
ENSOARG00000008149	NTAN1	N-terminal asparagine amidase	Source:HGNC Symbol;Acc:HGNC:29909]	24	2.25155	5.73555	-7.03058	7.43929e-06	9.69294e-05	4.00617
ENSOARG00000015974	SLC15A3	solute carrier family 15 (oligopeptide transporter), member 3	Source:HGNC Symbol;Acc:HGNC:18068]	21	-3.59757	4.77022	7.03073	7.43756e-06	9.69294e-05	4.03959
ENSOARG00000010428	CCDC22	coiled-coil domain containing 22	Source:HGNC Symbol;Acc:HGNC:28909]	X	-4.45956	4.2425	7.03023	7.44322e-06	9.69294e-05	4.05951
ENSOARG00000019772	SLC16A1	Uncharacterized protein	Source:UniProtKB/TrEMBL;Acc:W5QET6]	1	3.04232	5.36341	-7.02952	7.45137e-06	9.69407e-05	4.01603
ENSOARG00000015653	EEF2K	eukaryotic elongation factor 2 kinase	Source:HGNC Symbol;Acc:HGNC:24615]	24	2.53148	4.41136	-7.02815	7.46696e-06	9.70486e-05	4.0479
ENSOARG00000004046				23	-2.77387	5.04895	7.02719	7.47791e-06	9.70961e-05	4.0229
ENSOARG00000012384		Uncharacterized protein	Source:UniProtKB/TrEMBL;Acc:W5PS45]	5	2.03717	8.80976	-7.02152	7.54315e-06	9.78477e-05	3.99317
ENSOARG00000015937	TMEM204	transmembrane protein 204	Source:HGNC Symbol;Acc:HGNC:14158]	24	4.74555	2.72341	-7.01561	7.61159e-06	9.86369e-05	4.03839
ENSOARG00000015813	JOSD1	Josephin domain containing 1	Source:HGNC Symbol;Acc:HGNC:28953]	3	4.6127	8.7388	-7.01468	7.62244e-06	9.86369e-05	3.98222
ENSOARG00000005989	MKLN1	muskelin 1, intracellular mediator containing kelch motifs	Source:HGNC Symbol;Acc:HGNC:7109]	4	-2.18466	4.93577	7.01436	7.62622e-06	9.86369e-05	4.00624
ENSOARG00000004822	FBXO21	F-box protein 21	Source:HGNC Symbol;Acc:HGNC:13592]	17	2.84551	4.27603	-7.01063	7.66993e-06	9.9106e-05	4.0268
ENSOARG00000005763	SLC25A23	solute carrier family 25 (mitochondrial carrier; phosphate carrier), member 23	Source:HGNC Symbol;Acc:HGNC:19375]	5	5.62444	0.637175	-7.00968	7.68105e-06	9.91533e-05	3.60609
ENSOARG00000011690	DIABLO	diablo, IAP-binding mitochondrial protein	Source:HGNC Symbol;Acc:HGNC:21528]	17	-2.40956	5.22457	7.0082	7.69855e-06	9.9283e-05	3.98636
ENSOARG00000012170	TNFRSF25	tumor necrosis factor receptor superfamily, member 25	Source:HGNC Symbol;Acc:HGNC:11910]	12	4.7665	6.27714	-7.00652	7.71837e-06	9.94421e-05	3.96505
ENSOARG00000017355	SMAGP	small cell adhesion glycoprotein	Source:HGNC Symbol;Acc:HGNC:26918]	3	4.20915	3.29618	-7.00375	7.75122e-06	9.97688e-05	4.03651
ENSOARG00000003593		Uncharacterized protein	Source:UniProtKB/TrEMBL;Acc:W5P085]	14	3.21233	3.26788	-7.00259	7.76499e-06	9.98496e-05	4.03484
ENSOARG00000013938	RABGAP1	RAB GTPase activating protein 1	Source:HGNC Symbol;Acc:HGNC:17155]	3	-2.28105	5.47887	6.99904	7.80736e-06	0.000100297	3.9645
ENSOARG00000011734	FBXO31	F-box protein 31	Source:HGNC Symbol;Acc:HGNC:16510]	14	3.62215	5.16037	-6.99747	7.82616e-06	0.000100345	3.97444
ENSOARG00000016514	SP1	Sp1 transcription factor	Source:HGNC Symbol;Acc:HGNC:11205]	3	-2.42929	6.31716	6.99789	7.82107e-06	0.000100345	3.94806
ENSOARG00000001903	PITPNB	phosphatidylinositol transfer protein, beta	Source:HGNC Symbol;Acc:HGNC:9002]	17	3.10764	6.36124	-6.9941	7.86668e-06	0.000100768	3.9429
ENSOARG00000013267	ARPC5L	actin related protein 2/3 complex, subunit 5-like	Source:HGNC Symbol;Acc:HGNC:23366]	3	-3.71355	5.05285	6.99312	7.87855e-06	0.000100823	3.97215
ENSOARG00000011534				6	5.21287	2.30011	-6.99222	7.88946e-06	0.000100865	3.97244
ENSOARG00000015745	TOMM22	translocase of outer mitochondrial membrane 22 homolog (yeast)	Source:HGNC Symbol;Acc:HGNC:18002]	3	3.15556	6.77371	-6.98738	7.94821e-06	0.000101324	3.9316
ENSOARG00000018781		Uncharacterized protein	Source:UniProtKB/TrEMBL;Acc:W5QBS6]	24	2.90648	4.33317	-6.98638	7.96041e-06	0.000101324	3.98774
ENSOARG00000000718	TGDS	TDP-glucose 4,6-dehydratase	Source:HGNC Symbol;Acc:HGNC:20324]	10	-2.76239	4.74491	6.98716	7.95094e-06	0.000101324	3.97349
ENSOARG00000002212	TLK1	tousled-like kinase 1	Source:HGNC Symbol;Acc:HGNC:11841]	2	-3.00875	5.71901	6.98614	7.96338e-06	0.000101324	3.93935
ENSOARG00000008144	ZSWIM8	zinc finger, SWIM-type containing 8	Source:HGNC Symbol;Acc:HGNC:23528]	25	-3.83614	3.95549	6.98845	7.93515e-06	0.000101324	4.0047
ENSOARG00000000835	PNP	purine nucleoside phosphorylase	Source:HGNC Symbol;Acc:HGNC:7892]	AMGL01124041.1	4.04834	4.50637	-6.97991	8.03994e-06	0.0001022	3.97307
ENSOARG00000009623	FAM114A2	family with sequence similarity 114, member A2	Source:HGNC Symbol;Acc:HGNC:1333]	5	-2.7136	4.14804	6.97927	8.04774e-06	0.000102202	3.98338
ENSOARG00000021110	ARID4A	AT rich interactive domain 4A (RBP1-like)	Source:HGNC Symbol;Acc:HGNC:9885]	7	-3.27545	6.83983	6.97787	8.06507e-06	0.000102227	3.91711
ENSOARG00000002318	MFSD1	major facilitator superfamily domain containing 1	Source:HGNC Symbol;Acc:HGNC:25874]	1	-4.72435	5.07356	6.978	8.0635e-06	0.000102227	3.95067
ENSOARG00000009205	CDA	cytidine deaminase	Source:HGNC Symbol;Acc:HGNC:1712]	2	-6.89816	2.33036	6.97167	8.14225e-06	0.000103107	3.93584
ENSOARG00000005875	IRAK1	interleukin-1 receptor-associated kinase 1	Source:HGNC Symbol;Acc:HGNC:6112]	X	2.97722	5.38014	-6.9699	8.16443e-06	0.000103289	3.92389
ENSOARG00000007203	SKAP1	src kinase associated phosphoprotein 1	Source:HGNC Symbol;Acc:HGNC:15605]	11	3.70269	5.31867	-6.9682	8.18585e-06	0.000103462	3.92704
ENSOARG00000016894	SEMA3C	sema domain, immunoglobulin domain (Ig), short basic domain, secreted, (semaphorin) 3C	Source:HGNC Symbol;Acc:HGNC:10725]	4	-5.89792	1.27758	6.96579	8.2162e-06	0.000103747	3.75409
ENSOARG00000016579		Uncharacterized protein	Source:UniProtKB/TrEMBL;Acc:W5Q524]	18	-2.11731	6.87985	6.96229	8.26052e-06	0.000104011	3.89282
ENSOARG00000021043	SPATA5L1	spermatogenesis associated 5-like 1	Source:HGNC Symbol;Acc:HGNC:28762]	7	-3.16184	2.50002	6.96245	8.25858e-06	0.000104011	3.95299
ENSOARG00000000202		Uncharacterized protein	Source:UniProtKB/TrEMBL;Acc:W5NPU2]	JH922464.1	-6.82851	4.70525	6.96335	8.24712e-06	0.000104011	3.94909
ENSOARG00000001275	CRIP2	cysteine-rich protein 2	Source:HGNC Symbol;Acc:HGNC:2361]	JH922463.1	5.78677	2.48799	-6.95996	8.29021e-06	0.000104286	3.93981
ENSOARG00000016939		Uncharacterized protein	Source:UniProtKB/TrEMBL;Acc:W5Q653]	20	-4.38529	6.32026	6.95897	8.30282e-06	0.000104346	3.89153
ENSOARG00000002969	SSR3	signal sequence receptor, gamma (translocon-associated protein gamma)	Source:HGNC Symbol;Acc:HGNC:11325]	1	-3.36581	5.95584	6.95629	8.3372e-06	0.000104679	3.88916
ENSOARG00000000006	MT-ND1	NADH-ubiquinone oxidoreductase chain 1	Source:UniProtKB/Swiss-Prot;Acc:O78747]	MT	2.63274	11.8741	-6.95367	8.37088e-06	0.000105003	3.89602
ENSOARG00000003027	FAM65A	family with sequence similarity 65, member A	Source:HGNC Symbol;Acc:HGNC:25836]	14	5.23856	6.45868	-6.9465	8.46376e-06	0.000105979	3.87212
ENSOARG00000011167	CMTR2	cap methyltransferase 2	Source:HGNC Symbol;Acc:HGNC:25635]	14	-5.37159	3.14411	6.94644	8.46459e-06	0.000105979	3.95024
ENSOARG00000011811	STEAP4	STEAP family member 4	Source:HGNC Symbol;Acc:HGNC:21923]	4	-6.34148	3.62226	6.94411	8.49491e-06	0.000106258	3.9482
ENSOARG00000004222	ABHD5	1-acylglycerol-3-phosphate O-acyltransferase ABHD5	Source:RefSeq peptide;Acc:NP_001098403]	19	5.92713	3.92658	-6.94173	8.52613e-06	0.000106549	3.9378
ENSOARG00000018010	TOMM70A	translocase of outer mitochondrial membrane 70 homolog A (S. cerevisiae)	Source:HGNC Symbol;Acc:HGNC:11985]	1	-2.21913	6.07955	6.93838	8.57031e-06	0.0001069	3.85783
ENSOARG00000001844	VRK2	vaccinia related kinase 2	Source:HGNC Symbol;Acc:HGNC:12719]	3	-2.51892	4.74818	6.93856	8.56793e-06	0.0001069	3.89862
ENSOARG00000000372	RBM26	RNA binding motif protein 26	Source:HGNC Symbol;Acc:HGNC:20327]	10	-2.35826	5.50776	6.93754	8.58135e-06	0.000106937	3.86843
ENSOARG00000016133	NCKAP1L	NCK-associated protein 1-like	Source:HGNC Symbol;Acc:HGNC:4862]	3	-2.27154	7.89984	6.93534	8.61057e-06	0.000107201	3.85669
ENSOARG00000014668	ZFYVE16	zinc finger, FYVE domain containing 16	Source:HGNC Symbol;Acc:HGNC:20756]	5	-2.76382	4.81377	6.93263	8.64653e-06	0.000107548	3.88668
ENSOARG00000006923	RSL1D1	ribosomal L1 domain containing 1	Source:HGNC Symbol;Acc:HGNC:24534]	24	3.44949	7.38883	-6.92914	8.69321e-06	0.000108028	3.84421
ENSOARG00000004502	GPI	glucose-6-phosphate isomerase	Source:HGNC Symbol;Acc:HGNC:4458]	14	-3.39819	7.47979	6.92758	8.71424e-06	0.000108188	3.84226
ENSOARG00000021113	KIAA0586	KIAA0586	Source:HGNC Symbol;Acc:HGNC:19960]	7	-3.57751	3.9481	6.92372	8.76622e-06	0.000108732	3.90664
ENSOARG00000002400	CCDC88A	coiled-coil domain containing 88A	Source:HGNC Symbol;Acc:HGNC:25523]	3	-4.00699	3.55067	6.92177	8.79267e-06	0.000108883	3.91377
ENSOARG00000009551	FYB	FYN binding protein	Source:HGNC Symbol;Acc:HGNC:4036]	16	-4.45331	7.08499	6.92162	8.79471e-06	0.000108883	3.83129
ENSOARG00000009363	GLRX2	glutaredoxin 2	Source:HGNC Symbol;Acc:HGNC:16065]	12	-2.48758	5.35955	6.91946	8.82402e-06	0.000109144	3.8453
ENSOARG00000000381				19	-3.18167	2.88886	6.91636	8.86634e-06	0.000109566	3.90281
ENSOARG00000008433	TMCO3	transmembrane and coiled-coil domains 3	Source:HGNC Symbol;Acc:HGNC:20329]	10	2.80312	4.67563	-6.91544	8.87898e-06	0.00010962	3.86615
ENSOARG00000009490		Uncharacterized protein	Source:UniProtKB/TrEMBL;Acc:W5PIB7]	19	-8.23387	-0.0606058	6.91243	8.92034e-06	0.000110029	3.11398
ENSOARG00000005421	NDRG1	N-myc downstream regulated 1	Source:HGNC Symbol;Acc:HGNC:7679]	9	-4.75165	7.49665	6.91047	8.94738e-06	0.00011026	3.81594
ENSOARG00000013883	ARID5A	AT rich interactive domain 5A (MRF1-like)	Source:HGNC Symbol;Acc:HGNC:17361]	3	2.79763	8.04848	-6.9074	8.99002e-06	0.000110478	3.81407
ENSOARG00000007938	C18orf8	chromosome 18 open reading frame 8	Source:HGNC Symbol;Acc:HGNC:24326]	23	2.50165	5.29563	-6.90787	8.98339e-06	0.000110478	3.82983
ENSOARG00000020795	CIART	circadian associated repressor of transcription	Source:HGNC Symbol;Acc:HGNC:25200]	1	-5.983	1.07003	6.9083	8.97741e-06	0.000110478	3.62075
ENSOARG00000010526	C2CD2	C2 calcium-dependent domain containing 2	Source:HGNC Symbol;Acc:HGNC:1266]	1	5.81882	2.12846	-6.90673	8.99934e-06	0.000110491	3.83152
ENSOARG00000012848		Amidophosphoribosyltransferase	Source:UniProtKB/TrEMBL;Acc:W5PTH6]	24	3.883	2.81361	-6.90359	9.04303e-06	0.000110824	3.88091
ENSOARG00000004523	SOD2	superoxide dismutase 2, mitochondrial	Source:HGNC Symbol;Acc:HGNC:11180]	8	-7.21644	6.42794	6.90359	9.04309e-06	0.000110824	3.81096
ENSOARG00000020610	STRAP	serine/threonine kinase receptor associated protein	Source:HGNC Symbol;Acc:HGNC:30796]	3	2.006	7.5462	-6.90262	9.05667e-06	0.000110888	3.80388
ENSOARG00000014998	ZNF432	zinc finger protein 432	Source:HGNC Symbol;Acc:HGNC:20810]	14	3.59937	3.01817	-6.90111	9.07782e-06	0.000111045	3.88286
ENSOARG00000019496		Uncharacterized protein	Source:UniProtKB/TrEMBL;Acc:W5QDZ4]	7	-6.40272	0.606055	6.9005	9.08631e-06	0.000111047	3.41026
ENSOARG00000007601	DCLRE1C	DNA cross-link repair 1C	Source:HGNC Symbol;Acc:HGNC:17642]	13	2.50495	5.0124	-6.89857	9.11352e-06	0.000111277	3.82599
ENSOARG00000020488	VPS39	vacuolar protein sorting 39 homolog (S. cerevisiae)	Source:HGNC Symbol;Acc:HGNC:20593]	7	-3.07303	4.98716	6.8968	9.13843e-06	0.000111479	3.82494
ENSOARG00000008640	DHX57	DEAH (Asp-Glu-Ala-Asp/His) box polypeptide 57	Source:HGNC Symbol;Acc:HGNC:20086]	3	-3.64683	3.68698	6.89442	9.17213e-06	0.000111583	3.86968
ENSOARG00000001703	SLC38A7	solute carrier family 38, member 7	Source:HGNC Symbol;Acc:HGNC:25582]	14	-6.13806	1.43997	6.89493	9.165e-06	0.000111583	3.69634
ENSOARG00000003074	SRL	sarcalumenin	Source:HGNC Symbol;Acc:HGNC:11295]	24	-16.4728	-1.64945	6.89513	9.16206e-06	0.000111583	1.99825
ENSOARG00000005120	SLC25A16	solute carrier family 25 (mitochondrial carrier), member 16	Source:HGNC Symbol;Acc:HGNC:10986]	25	2.89517	3.45231	-6.88687	9.27999e-06	0.000112689	3.86196
ENSOARG00000019024	CYB5R3	cytochrome b5 reductase 3	Source:HGNC Symbol;Acc:HGNC:2873]	3	2.64635	6.02693	-6.8874	9.27238e-06	0.000112689	3.78018
ENSOARG00000011316	TBC1D14	TBC1 domain family, member 14	Source:HGNC Symbol;Acc:HGNC:29246]	6	2.54414	6.10114	-6.88381	9.32399e-06	0.00011312	3.77335
ENSOARG00000016386	ATG4D	autophagy related 4D, cysteine peptidase	Source:HGNC Symbol;Acc:HGNC:20789]	5	3.84102	3.94579	-6.88091	9.36593e-06	0.000113492	3.84318
ENSOARG00000006053	PAF1	Paf1, RNA polymerase II associated factor, homolog (S. cerevisiae)	Source:HGNC Symbol;Acc:HGNC:25459]	14	2.5297	7.59236	-6.88052	9.37169e-06	0.000113492	3.76976
ENSOARG00000013353		Uncharacterized protein	Source:UniProtKB/TrEMBL;Acc:W5PV31]	3	5.69764	2.98141	-6.87897	9.39416e-06	0.000113661	3.84667
ENSOARG00000005776	COX19	COX19 cytochrome c oxidase assembly factor	Source:HGNC Symbol;Acc:HGNC:28074]	24	3.1054	4.10596	-6.87455	9.45879e-06	0.000114339	3.82668
ENSOARG00000004102	CLK2	CDC-like kinase 2	Source:HGNC Symbol;Acc:HGNC:2069]	1	-2.24126	5.6445	6.87194	9.4971e-06	0.000114595	3.76338
ENSOARG00000008466	GEMIN2	gem (nuclear organelle) associated protein 2	Source:HGNC Symbol;Acc:HGNC:10884]	18	-2.8987	3.5834	6.87193	9.49723e-06	0.000114595	3.83742
ENSOARG00000012903	ITSN1	intersectin 1 (SH3 domain protein)	Source:HGNC Symbol;Acc:HGNC:6183]	1	-7.14125	1.33504	6.86905	9.53979e-06	0.000115005	3.61972
ENSOARG00000019511		Uncharacterized protein	Source:UniProtKB/TrEMBL;Acc:W5QE10]	7	-6.79512	4.08372	6.86664	9.57535e-06	0.000115329	3.82216
ENSOARG00000004374	MBP	myelin basic protein	Source:HGNC Symbol;Acc:HGNC:6925]	23	3.8104	4.46298	-6.86411	9.61306e-06	0.000115678	3.79809
ENSOARG00000004910	GAR1	GAR1 ribonucleoprotein	Source:HGNC Symbol;Acc:HGNC:14264]	6	3.04521	5.77528	-6.863	9.62966e-06	0.000115689	3.74758
ENSOARG00000002590	OST	osteopontin precursor	Source:RefSeq peptide;Acc:NP_001009224]	6	-10.2728	4.16113	6.86289	9.63134e-06	0.000115689	3.82221
ENSOARG00000011109	EEF2	eukaryotic translation elongation factor 2	Source:HGNC Symbol;Acc:HGNC:3214]	5	2.48909	11.6761	-6.85735	9.71448e-06	0.000116583	3.74643
ENSOARG00000021133	SLC38A6	solute carrier family 38, member 6	Source:HGNC Symbol;Acc:HGNC:19863]	7	-3.76529	2.0751	6.85345	9.77342e-06	0.000117184	3.76046
ENSOARG00000000270	ZFYVE1	zinc finger, FYVE domain containing 1	Source:HGNC Symbol;Acc:HGNC:13180]	7	-2.45928	4.59276	6.85226	9.7914e-06	0.00011719	3.77182
ENSOARG00000010980	LMBRD2	LMBR1 domain containing 2	Source:HGNC Symbol;Acc:HGNC:25287]	16	-4.83794	2.3333	6.85226	9.79151e-06	0.00011719	3.779
ENSOARG00000019257	C3orf52	chromosome 3 open reading frame 52	Source:HGNC Symbol;Acc:HGNC:26255]	1	-5.49266	2.33193	6.85017	9.8233e-06	0.000117465	3.76999
ENSOARG00000005108	DLL1	delta-like 1 (Drosophila)	Source:HGNC Symbol;Acc:HGNC:2908]	8	7.61209	4.36007	-6.84916	9.83873e-06	0.000117514	3.78991
ENSOARG00000001483	LETM2	leucine zipper-EF-hand containing transmembrane protein 2	Source:HGNC Symbol;Acc:HGNC:14648]	26	4.00408	3.71105	-6.84874	9.84509e-06	0.000117514	3.80007
ENSOARG00000016070	TRIP13	thyroid hormone receptor interactor 13	Source:HGNC Symbol;Acc:HGNC:12307]	16	3.10383	3.59624	-6.84732	9.86688e-06	0.000117669	3.80028
ENSOARG00000009043	STARD3NL	STARD3 N-terminal like	Source:HGNC Symbol;Acc:HGNC:19169]	4	-4.22653	3.27431	6.84388	9.91973e-06	0.000118193	3.79937
ENSOARG00000001016	EPN1	epsin 1	Source:HGNC Symbol;Acc:HGNC:21604]	14	2.65708	6.17202	-6.83867	1.00004e-05	0.000119047	3.70323
ENSOARG00000003953		Amidophosphoribosyltransferase	Source:UniProtKB/TrEMBL;Acc:W5P1C3]	6	4.23818	5.31607	-6.83678	1.00298e-05	0.000119078	3.72218
ENSOARG00000011068	BEND3	BEN domain containing 3	Source:HGNC Symbol;Acc:HGNC:23040]	8	3.79836	2.02462	-6.83724	1.00226e-05	0.000119078	3.7301
ENSOARG00000001570	RCN2	reticulocalbin 2, EF-hand calcium binding domain	Source:HGNC Symbol;Acc:HGNC:9935]	18	2.56226	3.44239	-6.83704	1.00257e-05	0.000119078	3.78703
ENSOARG00000011933	ADAP2	ArfGAP with dual PH domains 2	Source:HGNC Symbol;Acc:HGNC:16487]	11	-6.40483	0.384695	6.83509	1.00563e-05	0.000119286	3.2726
ENSOARG00000019690	TTLL4	tubulin tyrosine ligase-like family member 4	Source:HGNC Symbol;Acc:HGNC:28976]	2	-3.61877	4.1691	6.83025	1.01322e-05	0.000120034	3.75707
ENSOARG00000005020		Uncharacterized protein	Source:UniProtKB/TrEMBL;Acc:W5P4M5]	14	-3.12218	5.29661	6.82813	1.01657e-05	0.000120262	3.70734
ENSOARG00000009846	GPATCH11	G patch domain containing 11	Source:HGNC Symbol;Acc:HGNC:26768]	3	-6.38079	2.08774	6.8274	1.01772e-05	0.000120291	3.70894
ENSOARG00000008947	KCNN4	potassium channel, calcium activated intermediate/small conductance subfamily N alpha, member 4	Source:HGNC Symbol;Acc:HGNC:6293]	14	7.61562	2.57507	-6.82216	1.02605e-05	0.000120545	3.74062
ENSOARG00000011135	ATXN1L	ataxin 1-like	Source:HGNC Symbol;Acc:HGNC:33279]	14	3.36579	4.11335	-6.82206	1.0262e-05	0.000120545	3.74594
ENSOARG00000017059	TBL3	transducin (beta)-like 3	Source:HGNC Symbol;Acc:HGNC:11587]	24	3.3222	4.88157	-6.82235	1.02575e-05	0.000120545	3.71457
ENSOARG00000011917	DIDO1	death inducer-obliterator 1	Source:HGNC Symbol;Acc:HGNC:2680]	13	3.02769	5.22551	-6.82378	1.02347e-05	0.000120545	3.70281
ENSOARG00000001793	AKR1A1	aldo-keto reductase family 1, member A1 (aldehyde reductase)	Source:HGNC Symbol;Acc:HGNC:380]	1	-3.27008	5.61828	6.82509	1.02138e-05	0.000120545	3.69248
ENSOARG00000014792	FAM151B	family with sequence similarity 151, member B	Source:HGNC Symbol;Acc:HGNC:33716]	5	-4.42544	1.6742	6.8227	1.0252e-05	0.000120545	3.66256
ENSOARG00000017893	C20orf196	chromosome 20 open reading frame 196	Source:HGNC Symbol;Acc:HGNC:26318]	13	-5.39357	1.49597	6.82268	1.02523e-05	0.000120545	3.62133
ENSOARG00000014864		Pyruvate dehydrogenase E1 component subunit alpha	Source:UniProtKB/TrEMBL;Acc:W5PZQ4]	1	4.12854	2.86147	-6.8206	1.02854e-05	0.000120676	3.75922
ENSOARG00000002259	COASY	CoA synthase	Source:HGNC Symbol;Acc:HGNC:29932]	11	-4.3699	2.90555	6.82023	1.02913e-05	0.000120676	3.76028
ENSOARG00000003822	IRF4	interferon regulatory factor 4	Source:HGNC Symbol;Acc:HGNC:6119]	20	5.93709	8.94175	-6.81834	1.03217e-05	0.000120819	3.6783
ENSOARG00000004118	PQLC1	PQ loop repeat containing 1	Source:HGNC Symbol;Acc:HGNC:26188]	23	4.46198	2.87545	-6.8186	1.03176e-05	0.000120819	3.7572
ENSOARG00000016752	COL4A3BP	collagen, type IV, alpha 3 (Goodpasture antigen) binding protein	Source:HGNC Symbol;Acc:HGNC:2205]	7	-3.34506	5.50904	6.81747	1.03357e-05	0.000120877	3.68392
ENSOARG00000002203				AMGL01121378.1	2.74369	8.34069	-6.81542	1.03688e-05	0.000121157	3.672
ENSOARG00000003991	EVI2B	ecotropic viral integration site 2B	Source:HGNC Symbol;Acc:HGNC:3500]	11	-3.44002	7.29051	6.81311	1.04062e-05	0.000121282	3.6628
ENSOARG00000019580		Uncharacterized protein	Source:UniProtKB/TrEMBL;Acc:W5QE81]	7	-4.48532	3.28151	6.81307	1.04068e-05	0.000121282	3.75322
ENSOARG00000017006		Uncharacterized protein	Source:UniProtKB/TrEMBL;Acc:W5Q6B6]	20	-4.78263	8.64861	6.81386	1.03939e-05	0.000121282	3.67045
ENSOARG00000000698	MLLT10	myeloid/lymphoid or mixed-lineage leukemia (trithorax homolog, Drosophila); translocated to, 10	Source:HGNC Symbol;Acc:HGNC:16063]	13	-3.22009	4.5976	6.81206	1.04232e-05	0.000121367	3.71061
ENSOARG00000001354	COMMD3	COMM domain containing 3	Source:HGNC Symbol;Acc:HGNC:23332]	13	-3.57357	3.88566	6.81148	1.04326e-05	0.00012137	3.7386
ENSOARG00000013225	PRR3	proline rich 3	Source:HGNC Symbol;Acc:HGNC:21149]	20	3.14785	3.69161	-6.80677	1.05095e-05	0.000122045	3.7366
ENSOARG00000005827	GLMP	glycosylated lysosomal membrane protein	Source:HGNC Symbol;Acc:HGNC:29436]	1	-3.6222	3.3465	6.80585	1.05245e-05	0.000122045	3.74173
ENSOARG00000005091	DFFA	DNA fragmentation factor, 45kDa, alpha polypeptide	Source:HGNC Symbol;Acc:HGNC:2772]	12	-4.43349	3.11016	6.80512	1.05364e-05	0.000122045	3.74101
ENSOARG00000017298	PSD2	pleckstrin and Sec7 domain containing 2	Source:HGNC Symbol;Acc:HGNC:19092]	5	-5.83004	1.06192	6.80518	1.05356e-05	0.000122045	3.48376
ENSOARG00000020126	BUB1B	BUB1 mitotic checkpoint serine/threonine kinase B	Source:HGNC Symbol;Acc:HGNC:1149]	7	-7.47217	2.81734	6.80627	1.05177e-05	0.000122045	3.73086
ENSOARG00000021044	CLEC2B	C-type lectin domain family 2, member B	Source:HGNC Symbol;Acc:HGNC:2053]	3	-7.46028	2.71203	6.79859	1.06443e-05	0.000123187	3.71536
ENSOARG00000006876	BAZ1A	bromodomain adjacent to zinc finger domain, 1A	Source:HGNC Symbol;Acc:HGNC:960]	18	-3.58683	7.79173	6.79585	1.06899e-05	0.000123608	3.63856
ENSOARG00000012524	DIEXF	digestive organ expansion factor homolog (zebrafish)	Source:HGNC Symbol;Acc:HGNC:28440]	12	2.98317	5.57013	-6.79462	1.07105e-05	0.000123737	3.64641
ENSOARG00000007081	THADA	thyroid adenoma associated	Source:HGNC Symbol;Acc:HGNC:19217]	3	-2.68278	5.81886	6.79249	1.07461e-05	0.000124041	3.63516
ENSOARG00000009447				2	-2.41645	4.09659	6.78812	1.08197e-05	0.000124676	3.69309
ENSOARG00000003470	KIF3B	kinesin family member 3B	Source:HGNC Symbol;Acc:HGNC:6320]	13	-3.47324	4.57199	6.78811	1.08198e-05	0.000124676	3.67519
ENSOARG00000001465		Uncharacterized protein	Source:UniProtKB/TrEMBL;Acc:W5NTM9]	JH922562.1	-4.55479	5.67094	6.78687	1.08407e-05	0.000124809	3.63543
ENSOARG00000018177	UBC	polyubiquitin-B	Source:RefSeq peptide;Acc:NP_001009202]	17	3.55525	12.5105	-6.78162	1.09301e-05	0.000125729	3.62963
ENSOARG00000001870	VSTM4	V-set and transmembrane domain containing 4	Source:HGNC Symbol;Acc:HGNC:26470]	25	-9.27314	1.17878	6.78079	1.09442e-05	0.000125783	3.39802
ENSOARG00000008357	STAM2	signal transducing adaptor molecule (SH3 domain and ITAM motif) 2	Source:HGNC Symbol;Acc:HGNC:11358]	2	3.44772	5.59213	-6.77367	1.10666e-05	0.00012708	3.61274
ENSOARG00000014587	UPF2	UPF2 regulator of nonsense transcripts homolog (yeast)	Source:HGNC Symbol;Acc:HGNC:17854]	13	-2.80986	6.84913	6.7725	1.10869e-05	0.000127093	3.59689
ENSOARG00000012143	FBXO42	F-box protein 42	Source:HGNC Symbol;Acc:HGNC:29249]	2	-3.0785	4.04227	6.77295	1.10792e-05	0.000127093	3.67334
ENSOARG00000015989	MPHOSPH10	M-phase phosphoprotein 10 (U3 small nucleolar ribonucleoprotein)	Source:HGNC Symbol;Acc:HGNC:7213]	18	2.97641	6.23259	-6.76945	1.114e-05	0.000127592	3.59339
ENSOARG00000007496	ME1	Ovis aries malic enzyme 1, NADP(+)-dependent, cytosolic (ME1), mRNA.	Source:RefSeq mRNA;Acc:NM_001135220]	8	-9.73113	0.658583	6.76777	1.11692e-05	0.000127817	3.15073
ENSOARG00000013147	TRA2A	Ovis aries transformer 2 alpha homolog (Drosophila) (TRA2A), mRNA.	Source:RefSeq mRNA;Acc:NM_001130937]	4	2.76948	7.86497	-6.76718	1.11796e-05	0.000127826	3.59403
ENSOARG00000008163	POU2F2	POU class 2 homeobox 2	Source:HGNC Symbol;Acc:HGNC:9213]	14	3.55331	6.34441	-6.76063	1.12947e-05	0.000128813	3.57991
ENSOARG00000001871		Uncharacterized protein	Source:UniProtKB/TrEMBL;Acc:W5NUW7]	JH922095.1	3.29483	3.23554	-6.76061	1.1295e-05	0.000128813	3.67425
ENSOARG00000005894	CDH20	cadherin 20, type 2	Source:HGNC Symbol;Acc:HGNC:1760]	23	-5.79371	4.54421	6.76131	1.12828e-05	0.000128813	3.6442
ENSOARG00000014550		Pyruvate dehydrogenase E1 component subunit alpha	Source:UniProtKB/TrEMBL;Acc:W5PYS5]	X	3.4573	6.43363	-6.76005	1.13049e-05	0.000128816	3.5788
ENSOARG00000020532	CPSF6	cleavage and polyadenylation specific factor 6, 68kDa	Source:HGNC Symbol;Acc:HGNC:13871]	3	2.68411	6.36433	-6.75725	1.13546e-05	0.000129272	3.57314
ENSOARG00000004747				1	-2.68177	6.2139	6.75553	1.13853e-05	0.00012951	3.57143
ENSOARG00000004178				1	-4.99038	3.20931	6.75463	1.14012e-05	0.00012958	3.66563
ENSOARG00000005101	CHML	choroideremia-like (Rab escort protein 2)	Source:HGNC Symbol;Acc:HGNC:1941]	12	3.7655	5.05146	-6.74994	1.14852e-05	0.000130424	3.59667
ENSOARG00000015105	IGBP1	immunoglobulin (CD79A) binding protein 1	Source:HGNC Symbol;Acc:HGNC:5461]	X	-2.59855	4.10602	6.74247	1.16206e-05	0.000131848	3.62304
ENSOARG00000007016	CHST3	carbohydrate (chondroitin 6) sulfotransferase 3	Source:HGNC Symbol;Acc:HGNC:1971]	25	4.23834	2.03089	-6.74153	1.16377e-05	0.00013193	3.59226
ENSOARG00000012566	ACOT7	acyl-CoA thioesterase 7	Source:HGNC Symbol;Acc:HGNC:24157]	12	3.07079	3.72833	-6.73779	1.17061e-05	0.00013248	3.63052
ENSOARG00000008423	SOS1	son of sevenless homolog 1 (Drosophila)	Source:HGNC Symbol;Acc:HGNC:11187]	3	-2.23115	5.37859	6.73784	1.17052e-05	0.00013248	3.56126
ENSOARG00000011794	SLC9B2	solute carrier family 9, subfamily B (NHA2, cation proton antiporter 2), member 2	Source:HGNC Symbol;Acc:HGNC:25143]	6	-4.9722	3.5445	6.73626	1.17342e-05	0.000132685	3.63495
ENSOARG00000019028	PIKFYVE	phosphoinositide kinase, FYVE finger containing	Source:HGNC Symbol;Acc:HGNC:23785]	2	-3.44175	5.60061	6.73566	1.17452e-05	0.000132697	3.5529
ENSOARG00000011645	STAM	signal transducing adaptor molecule (SH3 domain and ITAM motif) 1	Source:HGNC Symbol;Acc:HGNC:11357]	13	-3.00747	4.16863	6.73243	1.18049e-05	0.000133145	3.60564
ENSOARG00000004833		Uncharacterized protein	Source:UniProtKB/TrEMBL;Acc:W5P427]	21	-4.19879	2.66546	6.73284	1.17974e-05	0.000133145	3.6241
ENSOARG00000013573	TNFAIP8L2	tumor necrosis factor, alpha-induced protein 8-like 2	Source:HGNC Symbol;Acc:HGNC:26277]	1	-4.97834	2.88122	6.73153	1.18215e-05	0.000133219	3.62781
ENSOARG00000011855		Integrin beta	Source:UniProtKB/TrEMBL;Acc:W5PQI3]	11	-3.74402	4.77131	6.73029	1.18445e-05	0.000133366	3.57695
ENSOARG00000003361		Uncharacterized protein	Source:UniProtKB/TrEMBL;Acc:W5NZJ1]	24	2.44653	5.77286	-6.72919	1.1865e-05	0.000133425	3.53662
ENSOARG00000006495	ATP1B3	ATPase, Na+/K+ transporting, beta 3 polypeptide	Source:HGNC Symbol;Acc:HGNC:806]	1	2.18752	6.71232	-6.72893	1.18698e-05	0.000133425	3.52774
ENSOARG00000018079	MTERF4	mitochondrial transcription termination factor 4	Source:HGNC Symbol;Acc:HGNC:28785]	1	1.81788	5.65562	-6.72626	1.19197e-05	0.00013376	3.53399
ENSOARG00000011255	TSTD2	thiosulfate sulfurtransferase (rhodanese)-like domain containing 2	Source:HGNC Symbol;Acc:HGNC:30087]	2	-2.88419	4.8441	6.72639	1.19173e-05	0.00013376	3.56634
ENSOARG00000010750				14	4.92676	1.55417	-6.7232	1.19771e-05	0.000134065	3.49946
ENSOARG00000014605		Uncharacterized protein	Source:UniProtKB/TrEMBL;Acc:W5PYX8]	1	-4.46849	2.47377	6.72402	1.19617e-05	0.000134065	3.60196
ENSOARG00000000675	KIAA1244	KIAA1244	Source:HGNC Symbol;Acc:HGNC:21213]	8	-10.3628	0.328658	6.72345	1.19724e-05	0.000134065	3.0055
ENSOARG00000004516	UBOX5	U-box domain containing 5	Source:HGNC Symbol;Acc:HGNC:17777]	13	2.3734	3.61457	-6.72014	1.20347e-05	0.000134597	3.60565
ENSOARG00000011931	CCDC107	coiled-coil domain containing 107	Source:HGNC Symbol;Acc:HGNC:28465]	2	-5.9342	2.32979	6.71912	1.20541e-05	0.000134701	3.58026
ENSOARG00000017777	RBL2	retinoblastoma-like 2	Source:HGNC Symbol;Acc:HGNC:9894]	14	-3.87549	4.42112	6.71515	1.21294e-05	0.000135428	3.56895
ENSOARG00000010327	UQCC2	ubiquinol-cytochrome c reductase complex assembly factor 2	Source:HGNC Symbol;Acc:HGNC:21237]	20	-2.84844	3.68199	6.71373	1.21565e-05	0.000135617	3.59442
ENSOARG00000019699	STK40	serine/threonine kinase 40	Source:HGNC Symbol;Acc:HGNC:21373]	1	2.60889	6.0894	-6.71203	1.21892e-05	0.000135868	3.50384
ENSOARG00000012160		Uncharacterized protein	Source:UniProtKB/TrEMBL;Acc:W5PRF8]	11	5.53005	4.73061	-6.70861	1.22547e-05	0.000136484	3.55039
ENSOARG00000000072	FOSL1	FOS-like antigen 1	Source:HGNC Symbol;Acc:HGNC:13718]	21	5.66916	1.22755	-6.70636	1.22982e-05	0.000136852	3.3968
ENSOARG00000016505	CPT1A	Ovis aries carnitine palmitoyltransferase 1A (liver) (CPT1A), nuclear gene encoding mitochondrial protein, mRNA.	Source:RefSeq mRNA;Acc:NM_001009414]	21	3.71574	7.26044	-6.70542	1.23165e-05	0.000136852	3.49313
ENSOARG00000004019	TTPAL	tocopherol (alpha) transfer protein-like	Source:HGNC Symbol;Acc:HGNC:16114]	13	3.60984	3.65535	-6.70531	1.23186e-05	0.000136852	3.58287
ENSOARG00000003359	TBK1	TANK-binding kinase 1	Source:HGNC Symbol;Acc:HGNC:11584]	3	-4.06596	5.48033	6.69971	1.24276e-05	0.000137947	3.50212
ENSOARG00000007252	CD1D	antigen-presenting glycoprotein CD1d precursor	Source:RefSeq peptide;Acc:NP_001116473]	1	5.0274	4.19876	-6.69915	1.24384e-05	0.000137952	3.5575
ENSOARG00000014830	ANXA5	annexin A5	Source:HGNC Symbol;Acc:HGNC:543]	6	-4.03672	6.92298	6.69688	1.2483e-05	0.000138331	3.47838
ENSOARG00000003458	STKLD1	serine/threonine kinase-like domain containing 1	Source:HGNC Symbol;Acc:HGNC:28669]	3	6.12493	1.74563	-6.69587	1.25028e-05	0.000138403	3.48099
ENSOARG00000007689	SLC38A9	solute carrier family 38, member 9	Source:HGNC Symbol;Acc:HGNC:26907]	16	-2.72319	3.88404	6.69549	1.25103e-05	0.000138403	3.55981
ENSOARG00000005448	EFNB2	ephrin-B2	Source:HGNC Symbol;Acc:HGNC:3227]	10	5.89216	0.176657	-6.69213	1.25766e-05	0.000139022	3.03312
ENSOARG00000019974	TSPYL4	TSPY-like 4	Source:HGNC Symbol;Acc:HGNC:21559]	8	-3.7929	4.27658	6.69095	1.26e-05	0.000139165	3.53818
ENSOARG00000017782	MAFG	v-maf avian musculoaponeurotic fibrosarcoma oncogene homolog G	Source:HGNC Symbol;Acc:HGNC:6781]	11	3.59334	7.90209	-6.68923	1.26342e-05	0.000139426	3.47097
ENSOARG00000020032		Uncharacterized protein	Source:UniProtKB/TrEMBL;Acc:W5QFL1]	2	3.93326	4.0815	-6.68714	1.26758e-05	0.00013977	3.53992
ENSOARG00000014474	MROH1	maestro heat-like repeat family member 1	Source:HGNC Symbol;Acc:HGNC:26958]	9	2.73598	6.08702	-6.68622	1.26942e-05	0.000139856	3.46338
ENSOARG00000004563	NKIRAS1	NFKB inhibitor interacting Ras-like 1	Source:HGNC Symbol;Acc:HGNC:17899]	26	3.98906	2.74487	-6.68361	1.27464e-05	0.00013998	3.55422
ENSOARG00000019608		Uncharacterized protein	Source:UniProtKB/TrEMBL;Acc:W5QEB0]	2	2.63023	6.66916	-6.68493	1.27201e-05	0.00013998	3.45788
ENSOARG00000015090	EAF1	ELL associated factor 1	Source:HGNC Symbol;Acc:HGNC:20907]	1	2.5577	4.29141	-6.68398	1.2739e-05	0.00013998	3.52363
ENSOARG00000013787	ATP6V1H	ATPase, H+ transporting, lysosomal 50/57kDa, V1 subunit H	Source:HGNC Symbol;Acc:HGNC:18303]	9	-2.3529	4.95668	6.68356	1.27474e-05	0.00013998	3.49342
ENSOARG00000015158	TMED4	transmembrane emp24 protein transport domain containing 4	Source:HGNC Symbol;Acc:HGNC:22301]	4	-2.8891	4.38761	6.68273	1.27641e-05	0.000140047	3.51826
ENSOARG00000007357	PIGM	phosphatidylinositol glycan anchor biosynthesis, class M	Source:HGNC Symbol;Acc:HGNC:18858]	1	-4.74516	2.43511	6.68199	1.27789e-05	0.000140095	3.53697
ENSOARG00000006133	TNFRSF4	tumor necrosis factor receptor superfamily, member 4	Source:HGNC Symbol;Acc:HGNC:11918]	12	-5.14837	1.53128	6.68041	1.28109e-05	0.00014033	3.42915
ENSOARG00000017898		Uncharacterized protein	Source:UniProtKB/TrEMBL;Acc:W5Q913]	4	-6.61952	0.560382	6.67946	1.28301e-05	0.000140347	3.12753
ENSOARG00000010166	FCRLA	Fc receptor-like A	Source:HGNC Symbol;Acc:HGNC:18504]	1	-6.86338	4.73882	6.67929	1.28336e-05	0.000140347	3.51025
ENSOARG00000005897	IRS2	insulin receptor substrate 2	Source:HGNC Symbol;Acc:HGNC:6126]	10	5.82119	0.780065	-6.67787	1.28622e-05	0.000140429	3.23267
ENSOARG00000015188	EXOSC4	exosome component 4	Source:HGNC Symbol;Acc:HGNC:18189]	9	-2.68993	3.35374	6.678	1.28595e-05	0.000140429	3.54742
ENSOARG00000015972	ACBD5	acyl-CoA binding domain containing 5	Source:HGNC Symbol;Acc:HGNC:23338]	13	-3.55281	2.8967	6.67668	1.28864e-05	0.000140578	3.54696
ENSOARG00000012577	DOHH	deoxyhypusine hydroxylase/monooxygenase	Source:HGNC Symbol;Acc:HGNC:28662]	5	2.88757	3.89426	-6.676	1.29002e-05	0.000140614	3.52855
ENSOARG00000008014	LRCH1	leucine-rich repeats and calponin homology (CH) domain containing 1	Source:HGNC Symbol;Acc:HGNC:20309]	10	-3.21097	4.94011	6.67369	1.29472e-05	0.000140972	3.48024
ENSOARG00000002143		Uncharacterized protein	Source:UniProtKB/TrEMBL;Acc:W5NVR0]	JH923881.1	-4.83152	6.16487	6.67335	1.29543e-05	0.000140972	3.4475
ENSOARG00000018282	SLC46A1	solute carrier family 46 (folate transporter), member 1	Source:HGNC Symbol;Acc:HGNC:30521]	11	3.93506	4.09413	-6.67196	1.29826e-05	0.000141151	3.51665
ENSOARG00000020936	MAGOHB	mago-nashi homolog B (Drosophila)	Source:HGNC Symbol;Acc:HGNC:25504]	3	-2.58652	4.7239	6.67151	1.2992e-05	0.000141151	3.48524
ENSOARG00000006843	NUMBL	numb homolog (Drosophila)-like	Source:HGNC Symbol;Acc:HGNC:8061]	14	7.88288	2.25052	-6.66986	1.30256e-05	0.000141401	3.49134
ENSOARG00000000558	RANBP2	RAN binding protein 2	Source:HGNC Symbol;Acc:HGNC:9848]	3	2.88105	9.16063	-6.66805	1.3063e-05	0.000141497	3.44254
ENSOARG00000010138	WDR18	WD repeat domain 18	Source:HGNC Symbol;Acc:HGNC:17956]	5	2.58331	4.95782	-6.66789	1.30663e-05	0.000141497	3.46969
ENSOARG00000001995		Uncharacterized protein	Source:UniProtKB/TrEMBL;Acc:W5NV97]	AMGL01124730.1	2.4632	5.43981	-6.66852	1.30533e-05	0.000141497	3.4509
ENSOARG00000016090	SLBP	stem-loop binding protein	Source:HGNC Symbol;Acc:HGNC:10904]	6	3.70614	6.81897	-6.6645	1.31363e-05	0.000142139	3.4271
ENSOARG00000006102	GPR174	G protein-coupled receptor 174	Source:HGNC Symbol;Acc:HGNC:30245]	X	-6.7476	1.07738	6.66291	1.31692e-05	0.000142379	3.28407
ENSOARG00000006373	CLEC16A	C-type lectin domain family 16, member A	Source:HGNC Symbol;Acc:HGNC:29013]	24	-3.93345	3.45921	6.66045	1.32205e-05	0.000142818	3.51945
ENSOARG00000014222	DENND4C	DENN/MADD domain containing 4C	Source:HGNC Symbol;Acc:HGNC:26079]	2	-2.88556	4.69164	6.65991	1.32317e-05	0.000142823	3.46828
ENSOARG00000018702	MCRS1	microspherule protein 1	Source:HGNC Symbol;Acc:HGNC:6960]	3	2.98777	6.38253	-6.65898	1.32513e-05	0.000142888	3.41749
ENSOARG00000013000	MRPS9	mitochondrial ribosomal protein S9	Source:HGNC Symbol;Acc:HGNC:14501]	3	2.9528	4.90509	-6.6586	1.32592e-05	0.000142888	3.45763
ENSOARG00000011731	CCDC88C	coiled-coil domain containing 88C	Source:HGNC Symbol;Acc:HGNC:19967]	18	3.26596	7.80989	-6.65566	1.33209e-05	0.000143437	3.41739
ENSOARG00000011884	PRKDC	protein kinase, DNA-activated, catalytic polypeptide	Source:HGNC Symbol;Acc:HGNC:9413]	9	2.87308	4.10848	-6.65177	1.34029e-05	0.000144087	3.48244
ENSOARG00000020240		Uncharacterized protein	Source:UniProtKB/TrEMBL;Acc:W5QG87]	1	-3.31933	3.82189	6.6518	1.34023e-05	0.000144087	3.49484
ENSOARG00000020304		Uncharacterized protein	Source:UniProtKB/TrEMBL;Acc:W5QGF5]	3	-3.74674	2.82264	6.64934	1.34546e-05	0.000144525	3.50467
ENSOARG00000006649				2	3.50344	5.22095	-6.64803	1.34823e-05	0.00014459	3.42976
ENSOARG00000006211	ABI3	ABI family, member 3	Source:HGNC Symbol;Acc:HGNC:29859]	11	-4.14184	5.21907	6.6485	1.34725e-05	0.00014459	3.43042
ENSOARG00000019335		Uncharacterized protein	Source:UniProtKB/TrEMBL;Acc:W5QDH2]	3	-3.56615	3.69322	6.64477	1.35521e-05	0.000145222	3.48903
ENSOARG00000000249	MAP7	microtubule-associated protein 7	Source:HGNC Symbol;Acc:HGNC:6869]	8	-5.9316	1.07816	6.64403	1.35678e-05	0.000145273	3.27428
ENSOARG00000010633	STAC2	SH3 and cysteine rich domain 2	Source:HGNC Symbol;Acc:HGNC:23990]	11	6.10058	4.44625	-6.64179	1.3616e-05	0.000145609	3.45898
ENSOARG00000016642	ITGB7	Integrin beta	Source:UniProtKB/TrEMBL;Acc:W5Q588]	3	-2.9504	7.79201	6.64155	1.36211e-05	0.000145609	3.39483
ENSOARG00000018465	AMFR	autocrine motility factor receptor, E3 ubiquitin protein ligase	Source:HGNC Symbol;Acc:HGNC:463]	14	1.8924	7.27449	-6.63897	1.36768e-05	0.000146087	3.38746
ENSOARG00000020576	CCL20	chemokine (C-C motif) ligand 20	Source:HGNC Symbol;Acc:HGNC:10619]	2	-15.9717	0.846521	6.63688	1.37221e-05	0.000146454	2.82024
ENSOARG00000002089		Uncharacterized protein	Source:UniProtKB/TrEMBL;Acc:W5NVK2]	AMGL01120087.1	-5.48373	0.7008	6.63394	1.37861e-05	0.000147018	3.15727
ENSOARG00000004375	AHCYL2	adenosylhomocysteinase-like 2	Source:HGNC Symbol;Acc:HGNC:22204]	4	-3.62651	1.89155	6.63329	1.38004e-05	0.000147053	3.42695
ENSOARG00000004491	GFM2	G elongation factor, mitochondrial 2	Source:HGNC Symbol;Acc:HGNC:29682]	16	-2.59966	3.92102	6.632	1.38284e-05	0.000147234	3.45903
ENSOARG00000003117		Uncharacterized protein	Source:UniProtKB/TrEMBL;Acc:W5NYS1]	13	2.0131	7.06717	-6.63079	1.3855e-05	0.000147282	3.3732
ENSOARG00000002600	C1orf21	chromosome 1 open reading frame 21	Source:HGNC Symbol;Acc:HGNC:15494]	12	-6.86119	0.565066	6.63107	1.38488e-05	0.000147282	3.08171
ENSOARG00000014751	STARD8	StAR-related lipid transfer (START) domain containing 8	Source:HGNC Symbol;Acc:HGNC:19161]	X	-3.91015	1.46094	6.62955	1.38821e-05	0.000147452	3.35764
ENSOARG00000008696	GOPC	golgi-associated PDZ and coiled-coil motif containing	Source:HGNC Symbol;Acc:HGNC:17643]	8	-2.72702	5.43168	6.62748	1.39277e-05	0.000147761	3.38582
ENSOARG00000015600		Uncharacterized protein	Source:UniProtKB/TrEMBL;Acc:W5Q1Z5]	2	-3.34392	4.54709	6.62722	1.39334e-05	0.000147761	3.42471
ENSOARG00000010269	FAM114A1	family with sequence similarity 114, member A1	Source:HGNC Symbol;Acc:HGNC:25087]	6	-4.52322	2.6603	6.62158	1.40585e-05	0.000148968	3.45846
ENSOARG00000001934		Uncharacterized protein	Source:UniProtKB/TrEMBL;Acc:W5NV38]	JH921586.1	5.18042	3.30044	-6.61885	1.41195e-05	0.000149258	3.45938
ENSOARG00000004763	FOXN2	forkhead box N2	Source:HGNC Symbol;Acc:HGNC:5281]	3	-3.2055	4.12982	6.61939	1.41074e-05	0.000149258	3.43137
ENSOARG00000007728	TMEM194A	transmembrane protein 194A	Source:HGNC Symbol;Acc:HGNC:29001]	3	-4.23407	2.40208	6.61925	1.41103e-05	0.000149258	3.44526
ENSOARG00000015887	TGIF2	TGFB-induced factor homeobox 2	Source:HGNC Symbol;Acc:HGNC:15764]	13	2.80651	4.06196	-6.61487	1.42086e-05	0.000150081	3.42625
ENSOARG00000015482	NEK7	NIMA-related kinase 7	Source:HGNC Symbol;Acc:HGNC:13386]	12	2.78276	4.80171	-6.61252	1.42617e-05	0.000150523	3.38861
ENSOARG00000018661	YWHAZ	Ovis aries tyrosine 3-monooxygenase/tryptophan 5-monooxygenase activation protein, zeta polypeptide (YWHAZ), mRNA.	Source:RefSeq mRNA;Acc:NM_001267887]	9	3.53487	9.25645	-6.60902	1.4341e-05	0.00015124	3.34896
ENSOARG00000002047	SMC4	structural maintenance of chromosomes 4	Source:HGNC Symbol;Acc:HGNC:14013]	1	-2.36483	7.08318	6.6084	1.43551e-05	0.000151269	3.33759
ENSOARG00000002673	CBFB	core-binding factor, beta subunit	Source:HGNC Symbol;Acc:HGNC:1539]	14	-2.54544	4.20816	6.60654	1.43976e-05	0.000151476	3.40766
ENSOARG00000006225	TRIM23	tripartite motif containing 23	Source:HGNC Symbol;Acc:HGNC:660]	16	-2.59678	3.88716	6.60694	1.43885e-05	0.000151476	3.42138
ENSOARG00000001652		Uncharacterized protein	Source:UniProtKB/TrEMBL;Acc:W5NU91]	5	-2.54969	3.70338	6.60486	1.44359e-05	0.000151759	3.42534
ENSOARG00000008208				12	-5.84247	3.96152	6.60333	1.44711e-05	0.000152009	3.42057
ENSOARG00000008434	ABHD3	abhydrolase domain containing 3	Source:HGNC Symbol;Acc:HGNC:18718]	23	-2.83412	4.25472	6.60076	1.45301e-05	0.000152509	3.39595
ENSOARG00000000213	ZNF212	zinc finger protein 212	Source:HGNC Symbol;Acc:HGNC:13004]	4	3.53943	3.82447	-6.60022	1.45426e-05	0.000152519	3.4147
ENSOARG00000006450	TFDP2	transcription factor Dp-2 (E2F dimerization partner 2)	Source:HGNC Symbol;Acc:HGNC:11751]	1	-4.38944	3.66516	6.59882	1.45748e-05	0.000152737	3.41936
ENSOARG00000014479	RPA1	Ovis aries replication protein A1, 70kDa (RPA1), mRNA.	Source:RefSeq mRNA;Acc:NM_001161889]	11	-3.19211	5.67638	6.5978	1.45986e-05	0.000152866	3.33248
ENSOARG00000008804	PPP2R4	protein phosphatase 2A activator, regulatory subunit 4	Source:HGNC Symbol;Acc:HGNC:9308]	3	-2.99232	4.8246	6.59485	1.4667e-05	0.000153461	3.36037
ENSOARG00000005690	FBXW2	F-box and WD repeat domain containing 2	Source:HGNC Symbol;Acc:HGNC:13608]	2	2.15922	6.7808	-6.59412	1.46839e-05	0.000153518	3.31336
ENSOARG00000014642				1	-3.24543	4.38351	6.59034	1.47723e-05	0.000154321	3.37389
ENSOARG00000019386	SMC1B	structural maintenance of chromosomes 1B	Source:HGNC Symbol;Acc:HGNC:11112]	3	5.85107	1.43534	-6.58619	1.48701e-05	0.000155105	3.27328
ENSOARG00000012886	THRA	thyroid hormone receptor alpha	Source:RefSeq peptide;Acc:NP_001094389]	11	4.34294	3.40823	-6.58616	1.48707e-05	0.000155105	3.40691
ENSOARG00000003866	SIDT2	SID1 transmembrane family, member 2	Source:HGNC Symbol;Acc:HGNC:24272]	15	2.94368	8.52897	-6.58428	1.49152e-05	0.000155448	3.30714
ENSOARG00000013778	YWHAG	tyrosine 3-monooxygenase/tryptophan 5-monooxygenase activation protein, gamma	Source:HGNC Symbol;Acc:HGNC:12852]	24	2.54467	6.35548	-6.58246	1.49584e-05	0.000155507	3.29513
ENSOARG00000014624	PPP2R1B	protein phosphatase 2, regulatory subunit A, beta	Source:HGNC Symbol;Acc:HGNC:9303]	15	2.43375	6.42046	-6.58285	1.49493e-05	0.000155507	3.29553
ENSOARG00000004501	PCSK7	proprotein convertase subtilisin/kexin type 7	Source:HGNC Symbol;Acc:HGNC:8748]	15	2.34791	5.59776	-6.5827	1.49528e-05	0.000155507	3.3085
ENSOARG00000020307	TFRC	Uncharacterized protein	Source:UniProtKB/TrEMBL;Acc:W5QGG0]	1	2.00387	5.6443	-6.58207	1.49677e-05	0.000155507	3.30594
ENSOARG00000017201	ZNF598	zinc finger protein 598	Source:HGNC Symbol;Acc:HGNC:28079]	24	2.1638	4.93206	-6.58095	1.49945e-05	0.000155664	3.33163
ENSOARG00000010070	FCGR3A	low affinity immunoglobulin gamma Fc region receptor III-A precursor	Source:RefSeq peptide;Acc:NP_001132926]	1	-5.36006	5.89165	6.57563	1.51216e-05	0.000156862	3.29829
ENSOARG00000007045	TAF4B	TAF4b RNA polymerase II, TATA box binding protein (TBP)-associated factor, 105kDa	Source:HGNC Symbol;Acc:HGNC:11538]	23	3.29439	5.80146	-6.57455	1.51478e-05	0.000157011	3.29207
ENSOARG00000004497	ZNF445	zinc finger protein 445	Source:HGNC Symbol;Acc:HGNC:21018]	19	-2.7857	4.76216	6.57284	1.51888e-05	0.000157314	3.32788
ENSOARG00000005595	CBX1	chromobox homolog 1	Source:HGNC Symbol;Acc:HGNC:1551]	X	-4.36984	3.97099	6.56412	1.54012e-05	0.000159389	3.35508
ENSOARG00000017556	NOLC1	nucleolar and coiled-body phosphoprotein 1	Source:HGNC Symbol;Acc:HGNC:15608]	22	2.85159	7.81036	-6.56225	1.54471e-05	0.00015974	3.26831
ENSOARG00000012994	CRYZL1	crystallin, zeta (quinone reductase)-like 1	Source:HGNC Symbol;Acc:HGNC:2420]	1	-2.72742	4.57511	6.55944	1.55164e-05	0.000160332	3.3151
ENSOARG00000007199	FAM46A	family with sequence similarity 46, member A	Source:HGNC Symbol;Acc:HGNC:18345]	8	3.85358	2.41379	-6.55799	1.55522e-05	0.000160577	3.35525
ENSOARG00000010329	ZBTB24	zinc finger and BTB domain containing 24	Source:HGNC Symbol;Acc:HGNC:21143]	8	2.46434	5.29383	-6.55629	1.55942e-05	0.000160887	3.27702
ENSOARG00000008463	DNAJB13	DnaJ (Hsp40) homolog, subfamily B, member 13	Source:HGNC Symbol;Acc:HGNC:30718]	15	7.41458	0.591455	-6.55369	1.56591e-05	0.000161181	2.98519
ENSOARG00000017088	HEATR3	HEAT repeat containing 3	Source:HGNC Symbol;Acc:HGNC:26087]	14	2.83374	3.49759	-6.55409	1.5649e-05	0.000161181	3.35329
ENSOARG00000003836	NHE1	Sodium/hydrogen exchanger	Source:UniProtKB/TrEMBL;Acc:W5P0Z4]	2	2.43076	5.15341	-6.55399	1.56516e-05	0.000161181	3.27951
ENSOARG00000007760	EDEM1	ER degradation enhancer, mannosidase alpha-like 1	Source:HGNC Symbol;Acc:HGNC:18967]	19	-2.16771	6.75915	6.54958	1.57619e-05	0.000162114	3.24196
ENSOARG00000020870	ARNT	Aryl-hydrocarbon receptor nuclear translocator; Uncharacterized protein	Source:UniProtKB/TrEMBL;Acc:T2K1D9]	1	-2.35031	6.78276	6.54762	1.58113e-05	0.000162496	3.23904
ENSOARG00000011444	ADM	adrenomedullin	Source:HGNC Symbol;Acc:HGNC:259]	15	-18.7598	0.215434	6.5466	1.5837e-05	0.000162634	2.3359
ENSOARG00000020315	MAN1A2	mannosidase, alpha, class 1A, member 2	Source:HGNC Symbol;Acc:HGNC:6822]	1	2.20479	5.77633	-6.54495	1.58786e-05	0.000162839	3.24331
ENSOARG00000018056	RNPS1	RNA binding protein S1, serine-rich domain	Source:HGNC Symbol;Acc:HGNC:10080]	24	2.19322	7.20307	-6.54484	1.58814e-05	0.000162839	3.23647
ENSOARG00000020598		Uncharacterized protein	Source:UniProtKB/TrEMBL;Acc:W5QHD5]	3	-4.20221	2.98187	6.5419	1.59559e-05	0.000163477	3.34328
ENSOARG00000006512	INTS8	integrator complex subunit 8	Source:HGNC Symbol;Acc:HGNC:26048]	9	-3.16901	5.60688	6.5405	1.59917e-05	0.000163593	3.24264
ENSOARG00000015932	ATP10D	ATPase, class V, type 10D	Source:HGNC Symbol;Acc:HGNC:13549]	6	-3.29408	4.2241	6.54051	1.59915e-05	0.000163593	3.30298
ENSOARG00000005029	LIN37	lin-37 DREAM MuvB core complex component	Source:HGNC Symbol;Acc:HGNC:33234]	14	-3.46727	3.46297	6.53988	1.60075e-05	0.000163628	3.33315
ENSOARG00000009769	TRAF3IP2	TRAF3 interacting protein 2	Source:HGNC Symbol;Acc:HGNC:1343]	8	-4.43235	3.71226	6.53917	1.60256e-05	0.000163687	3.32505
ENSOARG00000017774		Pyrroline-5-carboxylate reductase	Source:UniProtKB/TrEMBL;Acc:W5Q8M9]	12	-4.79835	2.864	6.53712	1.60781e-05	0.000164098	3.3349
ENSOARG00000004475	LSM14A	LSM14A, SCD6 homolog A (S. cerevisiae)	Source:HGNC Symbol;Acc:HGNC:24489]	14	-2.12515	7.27012	6.53503	1.61317e-05	0.000164519	3.22116
ENSOARG00000015069	MTFR2	mitochondrial fission regulator 2	Source:HGNC Symbol;Acc:HGNC:21115]	8	2.98985	3.25122	-6.53246	1.61981e-05	0.00016507	3.326
ENSOARG00000008647	POLR3F	polymerase (RNA) III (DNA directed) polypeptide F, 39 kDa	Source:HGNC Symbol;Acc:HGNC:15763]	11	3.476	2.87064	-6.53172	1.62171e-05	0.000165137	3.32752
ENSOARG00000001419	TPX2	TPX2, microtubule-associated	Source:HGNC Symbol;Acc:HGNC:1249]	13	-4.21786	4.41447	6.53092	1.62379e-05	0.000165222	3.28085
ENSOARG00000012051	MTUS2	microtubule associated tumor suppressor candidate 2	Source:HGNC Symbol;Acc:HGNC:20595]	10	5.80233	1.10381	-6.53003	1.62611e-05	0.000165332	3.12411
ENSOARG00000016250	HSPA13	heat shock protein 70kDa family, member 13	Source:HGNC Symbol;Acc:HGNC:11375]	1	2.46109	6.54302	-6.52947	1.62755e-05	0.000165352	3.20955
ENSOARG00000015587		Uncharacterized protein	Source:UniProtKB/TrEMBL;Acc:W5Q1Y5]	13	-3.82546	3.59053	6.52834	1.6305e-05	0.000165525	3.31165
ENSOARG00000004064	SERINC3	serine incorporator 3	Source:HGNC Symbol;Acc:HGNC:11699]	13	2.26283	8.12826	-6.52398	1.64187e-05	0.000166552	3.20886
ENSOARG00000010910				JH923649.1	3.98101	3.72701	-6.52312	1.64414e-05	0.000166656	3.2988
ENSOARG00000001555	NFATC2IP	nuclear factor of activated T-cells, cytoplasmic, calcineurin-dependent 2 interacting protein	Source:HGNC Symbol;Acc:HGNC:25906]	24	2.58954	3.49791	-6.52192	1.64731e-05	0.000166849	3.30337
ENSOARG00000019788	GNL2	guanine nucleotide binding protein-like 2 (nucleolar)	Source:HGNC Symbol;Acc:HGNC:29925]	1	2.83959	6.8836	-6.51975	1.65301e-05	0.000167299	3.19495
ENSOARG00000009583	DNAJA1	DnaJ (Hsp40) homolog, subfamily A, member 1	Source:HGNC Symbol;Acc:HGNC:5229]	2	2.90692	7.18836	-6.51827	1.65694e-05	0.000167534	3.19377
ENSOARG00000002191	NAGLU	N-acetylglucosaminidase, alpha	Source:HGNC Symbol;Acc:HGNC:7632]	11	-5.55971	2.42416	6.51792	1.65784e-05	0.000167534	3.29161
ENSOARG00000008537	NAV2	neuron navigator 2	Source:HGNC Symbol;Acc:HGNC:15997]	21	-12.4179	-1.71775	6.51633	1.66208e-05	0.000167835	1.64173
ENSOARG00000012973	RALB	v-ral simian leukemia viral oncogene homolog B	Source:HGNC Symbol;Acc:HGNC:9840]	2	-3.17244	4.2854	6.51276	1.67159e-05	0.000168667	3.25631
ENSOARG00000002028		Uncharacterized protein	Source:UniProtKB/TrEMBL;Acc:W5NVE2]	1	-2.23791	4.95123	6.50914	1.68128e-05	0.000169446	3.21629
ENSOARG00000004295	ATP9B	ATPase, class II, type 9B	Source:HGNC Symbol;Acc:HGNC:13541]	23	-2.49603	4.88882	6.50845	1.68313e-05	0.000169446	3.21844
ENSOARG00000010531	KDM1B	lysine (K)-specific demethylase 1B	Source:HGNC Symbol;Acc:HGNC:21577]	20	-3.78299	2.93487	6.50877	1.68227e-05	0.000169446	3.29263
ENSOARG00000021026	CLEC12A	C-type lectin domain family 12, member A	Source:HGNC Symbol;Acc:HGNC:31713]	3	-5.28602	2.12935	6.50446	1.69391e-05	0.000170402	3.25448
ENSOARG00000001753	NQO2	NAD(P)H dehydrogenase, quinone 2	Source:HGNC Symbol;Acc:HGNC:7856]	20	-5.6769	3.12667	6.50346	1.69662e-05	0.000170546	3.28436
ENSOARG00000009368				14	7.35162	-0.422351	-6.50215	1.70017e-05	0.000170585	2.45965
ENSOARG00000013863	KDM2B	lysine (K)-specific demethylase 2B	Source:HGNC Symbol;Acc:HGNC:13610]	17	2.59892	6.16756	-6.50227	1.69986e-05	0.000170585	3.16845
ENSOARG00000002394		Uncharacterized protein	Source:UniProtKB/TrEMBL;Acc:W5NWJ3]	AMGL01124480.1	-4.41496	2.73485	6.50191	1.70085e-05	0.000170585	3.28007
ENSOARG00000011586	BDH2	3-hydroxybutyrate dehydrogenase, type 2	Source:HGNC Symbol;Acc:HGNC:32389]	6	-4.33011	2.58463	6.50032	1.70517e-05	0.000170761	3.2724
ENSOARG00000015267	MCAM	melanoma cell adhesion molecule	Source:HGNC Symbol;Acc:HGNC:6934]	15	-4.86233	6.33236	6.50077	1.70394e-05	0.000170761	3.16982
ENSOARG00000003301	EXOC2	exocyst complex component 2	Source:HGNC Symbol;Acc:HGNC:24968]	20	-1.91907	5.60827	6.49913	1.70842e-05	0.00017094	3.17378
ENSOARG00000019055		Uncharacterized protein	Source:UniProtKB/TrEMBL;Acc:W5QCL8]	12	-5.07155	1.66458	6.49873	1.70952e-05	0.00017094	3.19609
ENSOARG00000007550	ABHD12	abhydrolase domain containing 12	Source:HGNC Symbol;Acc:HGNC:15868]	13	-4.87124	3.80412	6.49619	1.71648e-05	0.000171506	3.25678
ENSOARG00000007208	TJAP1	tight junction associated protein 1 (peripheral)	Source:HGNC Symbol;Acc:HGNC:17949]	20	-2.78605	3.10731	6.49373	1.72325e-05	0.000172053	3.26833
ENSOARG00000018894	IL21R	interleukin 21 receptor	Source:HGNC Symbol;Acc:HGNC:6006]	24	-2.5953	7.34346	6.48765	1.7401e-05	0.000173606	3.14535
ENSOARG00000015985	AMMECR1L	AMMECR1-like	Source:HGNC Symbol;Acc:HGNC:28658]	2	3.01563	5.09868	-6.48403	1.75022e-05	0.000174124	3.17078
ENSOARG00000005313		Uncharacterized protein	Source:UniProtKB/TrEMBL;Acc:W5P5K2]	9	2.7842	3.61421	-6.48392	1.75053e-05	0.000174124	3.24
ENSOARG00000007369		Uncharacterized protein	Source:UniProtKB/TrEMBL;Acc:W5PBU0]	13	-3.17239	2.69189	6.48509	1.74726e-05	0.000174124	3.25457
ENSOARG00000019541	TRAV16	T cell receptor alpha variable 16	Source:HGNC Symbol;Acc:HGNC:12112]	7	-4.21092	1.72759	6.48459	1.74867e-05	0.000174124	3.19051
ENSOARG00000004639	KLHL8	kelch-like family member 8	Source:HGNC Symbol;Acc:HGNC:18644]	6	-5.83372	4.61942	6.47936	1.76339e-05	0.000175273	3.19425
ENSOARG00000008104	ESD	esterase D	Source:HGNC Symbol;Acc:HGNC:3465]	10	-2.97629	3.93189	6.47816	1.76676e-05	0.000175477	3.21815
ENSOARG00000011942	DDX51	DEAD (Asp-Glu-Ala-Asp) box polypeptide 51	Source:HGNC Symbol;Acc:HGNC:20082]	17	2.99488	4.43625	-6.47514	1.77536e-05	0.000175936	3.1888
ENSOARG00000019412	SPICE1	spindle and centriole associated protein 1	Source:HGNC Symbol;Acc:HGNC:25083]	1	-4.42988	3.04909	6.47602	1.77285e-05	0.000175936	3.24208
ENSOARG00000021046	SLC28A2	solute carrier family 28 (concentrative nucleoside transporter), member 2	Source:HGNC Symbol;Acc:HGNC:11002]	7	-10.968	-1.28703	6.47515	1.77533e-05	0.000175936	1.89139
ENSOARG00000009780		Zinc finger Ran-binding domain-containing protein 2	Source:UniProtKB/TrEMBL;Acc:W5PJ65]	15	-3.04152	4.94665	6.47424	1.77792e-05	0.000176059	3.16207
ENSOARG00000011438	KANSL1	KAT8 regulatory NSL complex subunit 1	Source:HGNC Symbol;Acc:HGNC:24565]	11	-1.70988	6.26818	6.47273	1.78224e-05	0.000176314	3.11857
ENSOARG00000000125	DYNLT3	Ovis aries dynein, light chain, Tctex-type 3 (DYNLT3), mRNA.	Source:RefSeq mRNA;Acc:NM_001009762]	X	-2.43152	4.84769	6.47241	1.78315e-05	0.000176314	3.16279
ENSOARG00000002686		Uncharacterized protein	Source:UniProtKB/TrEMBL;Acc:W5NXF4]	JH921934.1	-5.23494	3.02053	6.47166	1.78529e-05	0.000176395	3.23572
ENSOARG00000014418	GRK4	G protein-coupled receptor kinase 4	Source:HGNC Symbol;Acc:HGNC:4543]	6	2.66203	3.34945	-6.4711	1.78688e-05	0.000176422	3.22822
ENSOARG00000009494	HDHD1	haloacid dehalogenase-like hydrolase domain containing 1	Source:HGNC Symbol;Acc:HGNC:16818]	X	3.28005	4.02349	-6.46973	1.79083e-05	0.000176453	3.20129
ENSOARG00000012390		Uncharacterized protein	Source:UniProtKB/TrEMBL;Acc:W5PS48]	20	3.25634	4.94736	-6.46961	1.79117e-05	0.000176453	3.15435
ENSOARG00000018213	ABI2	abl-interactor 2	Source:HGNC Symbol;Acc:HGNC:24011]	2	-5.44406	3.05468	6.46995	1.79019e-05	0.000176453	3.23297
ENSOARG00000009374	FBXL5	F-box and leucine-rich repeat protein 5	Source:HGNC Symbol;Acc:HGNC:13602]	6	-2.38508	5.99091	6.46832	1.79487e-05	0.000176539	3.11545
ENSOARG00000003365	FGR	FGR proto-oncogene, Src family tyrosine kinase	Source:HGNC Symbol;Acc:HGNC:3697]	2	-2.45414	6.34989	6.46747	1.79732e-05	0.000176539	3.11029
ENSOARG00000016516	C17orf62	chromosome 17 open reading frame 62	Source:HGNC Symbol;Acc:HGNC:28672]	11	-2.88983	4.44285	6.46746	1.79736e-05	0.000176539	3.1763
ENSOARG00000010060		Uncharacterized protein	Source:UniProtKB/TrEMBL;Acc:W5PK18]	JH922015.1	-7.5302	1.00005	6.46873	1.7937e-05	0.000176539	2.98252
ENSOARG00000017705	NT5C3B	5'-nucleotidase, cytosolic IIIB	Source:HGNC Symbol;Acc:HGNC:28300]	11	3.35959	3.3848	-6.46693	1.79888e-05	0.000176558	3.2216
ENSOARG00000013997	STARD7	StAR-related lipid transfer (START) domain containing 7	Source:HGNC Symbol;Acc:HGNC:18063]	3	2.3333	6.20113	-6.46494	1.80465e-05	0.000176994	3.10788
ENSOARG00000008299	NOL8	nucleolar protein 8	Source:HGNC Symbol;Acc:HGNC:23387]	2	3.05814	6.58703	-6.46442	1.80616e-05	0.000177011	3.10521
ENSOARG00000003467	HMOX2	heme oxygenase (decycling) 2	Source:HGNC Symbol;Acc:HGNC:5014]	24	2.76764	6.80603	-6.46323	1.8096e-05	0.000177219	3.10311
ENSOARG00000017631	PRKCB	protein kinase C, beta	Source:HGNC Symbol;Acc:HGNC:9395]	24	3.67077	5.99336	-6.46122	1.81545e-05	0.000177661	3.10659
ENSOARG00000015369	SAP30	Sin3A-associated protein, 30kDa	Source:HGNC Symbol;Acc:HGNC:10532]	2	-4.64265	2.85244	6.46021	1.81841e-05	0.000177819	3.21751
ENSOARG00000014335		Uncharacterized protein	Source:UniProtKB/TrEMBL;Acc:W5PY49]	19	8.53928	-0.524457	-6.45737	1.82672e-05	0.000178501	2.36122
ENSOARG00000013017	SUZ12	SUZ12 polycomb repressive complex 2 subunit	Source:HGNC Symbol;Acc:HGNC:17101]	11	-2.23145	6.34972	6.45585	1.83117e-05	0.000178804	3.091
ENSOARG00000000479	TTC17	tetratricopeptide repeat domain 17	Source:HGNC Symbol;Acc:HGNC:25596]	15	-2.44088	5.53251	6.45499	1.8337e-05	0.00017892	3.10618
ENSOARG00000015761	HTR7	5-hydroxytryptamine (serotonin) receptor 7, adenylate cyclase-coupled	Source:HGNC Symbol;Acc:HGNC:5302]	22	-5.31063	2.65565	6.45435	1.8356e-05	0.000178974	3.20504
ENSOARG00000000901		Uncharacterized protein	Source:UniProtKB/TrEMBL;Acc:W5NRZ1]	AMGL01126078.1	4.04104	2.87241	-6.45024	1.84776e-05	0.000180028	3.20261
ENSOARG00000008459	TMEM67	transmembrane protein 67	Source:HGNC Symbol;Acc:HGNC:28396]	9	-5.1188	2.10693	6.44857	1.85272e-05	0.000180379	3.17036
ENSOARG00000003180	IL27	interleukin 27	Source:HGNC Symbol;Acc:HGNC:19157]	24	-4.69135	0.540045	6.44674	1.85817e-05	0.000180778	2.88468
ENSOARG00000003516	THAP1	THAP domain containing, apoptosis associated protein 1	Source:HGNC Symbol;Acc:HGNC:20856]	26	2.74839	3.48508	-6.44616	1.8599e-05	0.000180814	3.18517
ENSOARG00000000472	SEC62	SEC62 homolog (S. cerevisiae)	Source:HGNC Symbol;Acc:HGNC:11846]	1	-2.81132	6.49331	6.44545	1.86203e-05	0.000180826	3.07434
ENSOARG00000006351	MRPL24	mitochondrial ribosomal protein L24	Source:HGNC Symbol;Acc:HGNC:14037]	1	-2.86412	3.66107	6.44521	1.86274e-05	0.000180826	3.17782
ENSOARG00000017544	LRRC45	leucine rich repeat containing 45	Source:HGNC Symbol;Acc:HGNC:28302]	11	3.38174	3.62511	-6.44329	1.86851e-05	0.00018099	3.17635
ENSOARG00000012056		Uncharacterized protein	Source:UniProtKB/TrEMBL;Acc:W5PR44]	8	3.22633	3.06095	-6.44412	1.86603e-05	0.00018099	3.1923
ENSOARG00000008353		Uncharacterized protein	Source:UniProtKB/TrEMBL;Acc:W5PEU3]	4	-3.49427	2.5313	6.44335	1.86832e-05	0.00018099	3.18757
ENSOARG00000019293	DGKD	diacylglycerol kinase, delta 130kDa	Source:HGNC Symbol;Acc:HGNC:2851]	1	1.90938	5.8003	-6.44121	1.87476e-05	0.000181331	3.07508
ENSOARG00000015620	PDZD11	PDZ domain containing 11	Source:HGNC Symbol;Acc:HGNC:28034]	X	-4.23706	3.69713	6.44161	1.87357e-05	0.000181331	3.1725
ENSOARG00000014368	DYRK1A	dual-specificity tyrosine-(Y)-phosphorylation regulated kinase 1A	Source:HGNC Symbol;Acc:HGNC:3091]	1	1.80039	8.66306	-6.43808	1.88422e-05	0.000182114	3.07268
ENSOARG00000008471	RAP1GAP	RAP1 GTPase activating protein	Source:HGNC Symbol;Acc:HGNC:9858]	2	4.87023	1.26144	-6.43757	1.88578e-05	0.000182117	3.04491
ENSOARG00000004662	SMAD4	Ovis aries SMAD family member 4 (SMAD4), mRNA.	Source:RefSeq mRNA;Acc:NM_001267886]	23	2.08477	6.43197	-6.43626	1.88976e-05	0.000182117	3.05879
ENSOARG00000011948	TPRKB	TP53RK binding protein	Source:HGNC Symbol;Acc:HGNC:24259]	3	-2.64243	3.94987	6.437	1.88751e-05	0.000182117	3.15126
ENSOARG00000008684	NPEPPS	aminopeptidase puromycin sensitive	Source:HGNC Symbol;Acc:HGNC:7900]	11	-3.35704	5.549	6.43582	1.89109e-05	0.000182117	3.07576
ENSOARG00000018722	HDAC4	histone deacetylase 4	Source:HGNC Symbol;Acc:HGNC:14063]	1	-4.64959	3.06923	6.43622	1.88988e-05	0.000182117	3.18073
ENSOARG00000004895	RPS6KA2	ribosomal protein S6 kinase, 90kDa, polypeptide 2	Source:HGNC Symbol;Acc:HGNC:10431]	8	-6.74915	4.34956	6.43281	1.90027e-05	0.000182868	3.13809
ENSOARG00000017371	TNFRSF8	tumor necrosis factor receptor superfamily, member 8	Source:HGNC Symbol;Acc:HGNC:11923]	12	-3.40683	3.04386	6.4311	1.9055e-05	0.000183239	3.17259
ENSOARG00000002462	AGPAT6	1-acylglycerol-3-phosphate O-acyltransferase 6	Source:HGNC Symbol;Acc:HGNC:20880]	26	1.73804	6.68241	-6.42892	1.91221e-05	0.000183629	3.04688
ENSOARG00000012263	BCL7A	B-cell CLL/lymphoma 7A	Source:HGNC Symbol;Acc:HGNC:1004]	17	-4.97489	0.865064	6.42889	1.91232e-05	0.000183629	2.9433
ENSOARG00000010684	SNN	stannin	Source:HGNC Symbol;Acc:HGNC:11149]	24	4.04187	4.21885	-6.42683	1.91865e-05	0.000184064	3.12477
ENSOARG00000014470	IFT122	intraflagellar transport 122	Source:HGNC Symbol;Acc:HGNC:13556]	19	2.89497	3.41126	-6.42652	1.91961e-05	0.000184064	3.15705
ENSOARG00000018905	FAM192A	family with sequence similarity 192, member A	Source:HGNC Symbol;Acc:HGNC:29856]	14	-2.21807	4.55195	6.42554	1.92265e-05	0.000184223	3.10178
ENSOARG00000007071	WWC2	WW and C2 domain containing 2	Source:HGNC Symbol;Acc:HGNC:24148]	26	-7.82709	3.19111	6.42319	1.92993e-05	0.000184787	3.16123
ENSOARG00000002569		Uncharacterized protein	Source:UniProtKB/TrEMBL;Acc:W5NX32]	JH921748.1	-12.2494	3.54797	6.42257	1.93187e-05	0.00018484	3.16026
ENSOARG00000005791	ACTN4	actinin, alpha 4	Source:HGNC Symbol;Acc:HGNC:166]	14	-2.79527	7.34099	6.42156	1.93501e-05	0.000185008	3.03839
ENSOARG00000019320	ATG16L1	autophagy related 16-like 1 (S. cerevisiae)	Source:HGNC Symbol;Acc:HGNC:21498]	1	2.77017	4.58845	-6.41799	1.94616e-05	0.00018594	3.08887
ENSOARG00000014315	HRH1	histamine receptor H1	Source:HGNC Symbol;Acc:HGNC:5182]	19	5.38208	2.70928	-6.41737	1.94812e-05	0.000185993	3.1503
ENSOARG00000019090	RIPK3	receptor-interacting serine-threonine kinase 3	Source:HGNC Symbol;Acc:HGNC:10021]	7	3.63226	7.89885	-6.41303	1.96181e-05	0.000187166	3.0281
ENSOARG00000002983				12	-4.16682	3.57512	6.41185	1.96553e-05	0.000187387	3.13059
ENSOARG00000000492	NLRP12	NLR family, pyrin domain containing 12	Source:HGNC Symbol;Acc:HGNC:22938]	14	-5.24056	2.67948	6.40954	1.97286e-05	0.000187951	3.13716
ENSOARG00000005523		Uncharacterized protein	Source:UniProtKB/TrEMBL;Acc:W5P676]	18	-9.10719	3.04981	6.40643	1.98279e-05	0.000188762	3.13417
ENSOARG00000004356	CARD11	caspase recruitment domain family, member 11	Source:HGNC Symbol;Acc:HGNC:16393]	24	3.03479	7.8151	-6.40375	1.99138e-05	0.000189444	3.01255
ENSOARG00000016676	CTNNA1	catenin (cadherin-associated protein), alpha 1, 102kDa	Source:HGNC Symbol;Acc:HGNC:2509]	5	-3.59177	2.95977	6.40321	1.99311e-05	0.000189474	3.13019
ENSOARG00000018142	LMNB1	lamin B1	Source:HGNC Symbol;Acc:HGNC:6637]	5	2.45364	7.70437	-6.40222	1.9963e-05	0.000189539	3.0093
ENSOARG00000016635	PPIL3	Ovis aries peptidylprolyl isomerase (cyclophilin)-like 3 (PPIL3), mRNA.	Source:RefSeq mRNA;Acc:NM_001163049]	2	-2.89865	3.51055	6.40211	1.99665e-05	0.000189539	3.11676
ENSOARG00000016268	IDUA	iduronidase, alpha-L-	Source:HGNC Symbol;Acc:HGNC:5391]	6	2.96194	2.72027	-6.40078	2.00094e-05	0.000189811	3.1261
ENSOARG00000012531	HYOU1	hypoxia up-regulated 1	Source:HGNC Symbol;Acc:HGNC:16931]	15	-3.42665	6.11259	6.39961	2.00472e-05	0.000190035	3.00416
ENSOARG00000015434	HNRNPA0	heterogeneous nuclear ribonucleoprotein A0	Source:HGNC Symbol;Acc:HGNC:5030]	5	2.42402	6.83611	-6.39862	2.00791e-05	0.000190202	2.99829
ENSOARG00000016982	ILF3	interleukin enhancer binding factor 3, 90kDa	Source:HGNC Symbol;Acc:HGNC:6038]	5	2.74664	7.32641	-6.39747	2.01165e-05	0.000190408	2.99909
ENSOARG00000019895	EMC4	ER membrane protein complex subunit 4	Source:HGNC Symbol;Acc:HGNC:28032]	7	-3.13322	4.42582	6.39707	2.01295e-05	0.000190408	3.06428
ENSOARG00000012752		Uncharacterized protein	Source:UniProtKB/TrEMBL;Acc:W5PT72]	7	-4.99802	1.68504	6.39646	2.01493e-05	0.00019046	3.0542
ENSOARG00000007961	AKAP17A	A kinase (PRKA) anchor protein 17A	Source:HGNC Symbol;Acc:HGNC:18783]	X	3.32696	6.44208	-6.3918	2.03016e-05	0.000191763	2.98781
ENSOARG00000007556	NUFIP1	nuclear fragile X mental retardation protein interacting protein 1	Source:HGNC Symbol;Acc:HGNC:8057]	10	2.4039	4.55572	-6.39026	2.03522e-05	0.000191968	3.04578
ENSOARG00000010740	ZRANB1	zinc finger, RAN-binding domain containing 1	Source:HGNC Symbol;Acc:HGNC:18224]	22	2.00137	6.30314	-6.39049	2.03447e-05	0.000191968	2.98471
ENSOARG00000004165	ISLR2	immunoglobulin superfamily containing leucine-rich repeat 2	Source:HGNC Symbol;Acc:HGNC:29286]	18	5.89134	1.66506	-6.38786	2.04311e-05	0.000192074	3.01407
ENSOARG00000017944		Uncharacterized protein	Source:UniProtKB/TrEMBL;Acc:W5Q967]	6	2.31439	7.48767	-6.38773	2.04356e-05	0.000192074	2.98431
ENSOARG00000004355	GATB	glutamyl-tRNA(Gln) amidotransferase, subunit B	Source:HGNC Symbol;Acc:HGNC:8849]	17	-3.07081	2.63073	6.38904	2.03923e-05	0.000192074	3.10713
ENSOARG00000019252	IKZF2	IKAROS family zinc finger 2 (Helios)	Source:HGNC Symbol;Acc:HGNC:13177]	2	-4.20614	4.21631	6.38799	2.04269e-05	0.000192074	3.063
ENSOARG00000008950	C9orf64	chromosome 9 open reading frame 64	Source:HGNC Symbol;Acc:HGNC:28144]	2	-6.08871	1.49507	6.38846	2.04114e-05	0.000192074	3.00721
ENSOARG00000012266	MRPL16	mitochondrial ribosomal protein L16	Source:HGNC Symbol;Acc:HGNC:14476]	15	2.29326	4.7841	-6.38672	2.04688e-05	0.000192198	3.02798
ENSOARG00000003975		Uncharacterized protein	Source:UniProtKB/TrEMBL;Acc:W5P1E9]	11	-2.8322	5.28261	6.38515	2.0521e-05	0.000192198	3.00227
ENSOARG00000015162		Uncharacterized protein	Source:UniProtKB/TrEMBL;Acc:W5Q0N1]	20	-3.08039	4.50312	6.38543	2.05116e-05	0.000192198	3.04144
ENSOARG00000020694	BOLA1	bolA family member 1	Source:HGNC Symbol;Acc:HGNC:24263]	1	-3.37583	2.70741	6.38606	2.04906e-05	0.000192198	3.10327
ENSOARG00000000327	LAMA1	laminin, alpha 1	Source:HGNC Symbol;Acc:HGNC:6481]	23	-5.44802	2.62553	6.38523	2.05182e-05	0.000192198	3.09829
ENSOARG00000000739		Transporter	Source:UniProtKB/TrEMBL;Acc:W5NRG6]	1	2.49226	6.64566	-6.38247	2.061e-05	0.000192626	2.97148
ENSOARG00000010243	EIF4G2	Uncharacterized protein	Source:UniProtKB/TrEMBL;Acc:W5PKL6]	15	2.11321	10.1298	-6.38271	2.0602e-05	0.000192626	2.987
ENSOARG00000015713	IFT81	intraflagellar transport 81	Source:HGNC Symbol;Acc:HGNC:14313]	17	-5.0939	0.304911	6.38251	2.06086e-05	0.000192626	2.70437
ENSOARG00000004164		Uncharacterized protein	Source:UniProtKB/TrEMBL;Acc:W5P205]	20	2.08638	5.96415	-6.38155	2.06406e-05	0.000192776	2.97421
ENSOARG00000002056	PTPN9	protein tyrosine phosphatase, non-receptor type 9	Source:HGNC Symbol;Acc:HGNC:9661]	18	-3.46976	3.72575	6.37891	2.07289e-05	0.000193465	3.07085
ENSOARG00000007144	TCOF1	Treacher Collins-Franceschetti syndrome 1	Source:HGNC Symbol;Acc:HGNC:11654]	5	3.44586	8.44574	-6.37512	2.08564e-05	0.000194518	2.96919
ENSOARG00000012059	PIGA	phosphatidylinositol glycan anchor biosynthesis, class A	Source:HGNC Symbol;Acc:HGNC:8957]	X	2.99311	5.01954	-6.37233	2.09505e-05	0.000195259	2.9937
ENSOARG00000002165	NOP16	NOP16 nucleolar protein	Source:HGNC Symbol;Acc:HGNC:26934]	5	2.0293	5.76597	-6.37093	2.0998e-05	0.000195498	2.9616
ENSOARG00000019202	ATRAID	all-trans retinoic acid-induced differentiation factor	Source:HGNC Symbol;Acc:HGNC:24090]	3	-3.40147	4.44518	6.37028	2.10201e-05	0.000195498	3.0209
ENSOARG00000010196	TNFRSF9	tumor necrosis factor receptor superfamily, member 9	Source:HGNC Symbol;Acc:HGNC:11924]	12	-6.22124	2.70321	6.37051	2.10125e-05	0.000195498	3.07742
ENSOARG00000006946				2	-6.97822	1.80989	6.36971	2.10397e-05	0.000195543	3.01529
ENSOARG00000018419	OGFOD1	2-oxoglutarate and iron-dependent oxygenase domain containing 1	Source:HGNC Symbol;Acc:HGNC:25585]	14	-2.39807	5.0503	6.36683	2.11381e-05	0.000196221	2.98259
ENSOARG00000017292	CDS2	CDP-diacylglycerol synthase (phosphatidate cytidylyltransferase) 2	Source:HGNC Symbol;Acc:HGNC:1801]	13	-2.86504	5.51663	6.36671	2.11422e-05	0.000196221	2.96411
ENSOARG00000017315		Uncharacterized protein	Source:UniProtKB/TrEMBL;Acc:W5Q790]	18	-4.05261	2.29261	6.36611	2.11624e-05	0.000196272	3.0603
ENSOARG00000006375	FKBP15	FK506 binding protein 15, 133kDa	Source:HGNC Symbol;Acc:HGNC:23397]	2	-3.22067	4.97417	6.36524	2.11925e-05	0.000196415	2.98575
ENSOARG00000012989	CABLES2	Cdk5 and Abl enzyme substrate 2	Source:HGNC Symbol;Acc:HGNC:16143]	13	3.84109	2.13092	-6.36465	2.12125e-05	0.000196463	3.05178
ENSOARG00000010235	TMF1	TATA element modulatory factor 1	Source:HGNC Symbol;Acc:HGNC:11870]	19	-2.20234	7.25647	6.36237	2.12912e-05	0.000197055	2.94135
ENSOARG00000003302	DNAJA3	DnaJ (Hsp40) homolog, subfamily A, member 3	Source:HGNC Symbol;Acc:HGNC:11808]	24	-2.93927	4.6476	6.35804	2.14407e-05	0.000198301	2.99074
ENSOARG00000016151	CLUH	clustered mitochondria (cluA/CLU1) homolog	Source:HGNC Symbol;Acc:HGNC:29094]	11	4.0322	6.02762	-6.35677	2.14849e-05	0.000198571	2.93747
ENSOARG00000011893	APC2	adenomatosis polyposis coli 2	Source:HGNC Symbol;Acc:HGNC:24036]	5	4.63844	2.96075	-6.35546	2.15308e-05	0.000198858	3.05642
ENSOARG00000011696	GEMIN8	gem (nuclear organelle) associated protein 8	Source:HGNC Symbol;Acc:HGNC:26044]	X	-3.79174	2.96222	6.346	2.18635e-05	0.00020179	3.04133
ENSOARG00000000967		Uncharacterized protein	Source:UniProtKB/TrEMBL;Acc:W5NS59]	7	-2.21186	4.63673	6.34074	2.20505e-05	0.000203093	2.961
ENSOARG00000003643	ARFIP1	ADP-ribosylation factor interacting protein 1	Source:HGNC Symbol;Acc:HGNC:21496]	17	-2.59673	2.91638	6.34081	2.20482e-05	0.000203093	3.03328
ENSOARG00000013500	PLGRKT	plasminogen receptor, C-terminal lysine transmembrane protein	Source:HGNC Symbol;Acc:HGNC:23633]	2	-2.73637	5.05348	6.34094	2.20435e-05	0.000203093	2.94108
ENSOARG00000015328	MTA2	metastasis associated 1 family, member 2	Source:HGNC Symbol;Acc:HGNC:7411]	21	-2.10274	7.31168	6.33754	2.21652e-05	0.000203727	2.90126
ENSOARG00000005122	FAM120B	family with sequence similarity 120B	Source:HGNC Symbol;Acc:HGNC:21109]	8	-3.45894	3.08827	6.33776	2.21575e-05	0.000203727	3.02689
ENSOARG00000010007	OTUD6B	OTU domain containing 6B	Source:HGNC Symbol;Acc:HGNC:24281]	9	2.34769	5.27964	-6.33595	2.22226e-05	0.000204113	2.92167
ENSOARG00000016242	FAM129C	family with sequence similarity 129, member C	Source:HGNC Symbol;Acc:HGNC:24130]	5	7.04207	5.19959	-6.33485	2.22624e-05	0.000204338	2.94077
ENSOARG00000013136	PITRM1	pitrilysin metallopeptidase 1	Source:HGNC Symbol;Acc:HGNC:17663]	13	2.75521	5.10334	-6.33346	2.23126e-05	0.000204658	2.92621
ENSOARG00000019439	SFPQ	splicing factor proline/glutamine-rich	Source:HGNC Symbol;Acc:HGNC:10774]	1	4.09938	9.53973	-6.33287	2.23338e-05	0.000204711	2.90411
ENSOARG00000004041	POP4	processing of precursor 4, ribonuclease P/MRP subunit (S. cerevisiae)	Source:HGNC Symbol;Acc:HGNC:30081]	14	3.04482	4.00662	-6.33207	2.2363e-05	0.000204838	2.98171
ENSOARG00000019637		Ubiquitin carboxyl-terminal hydrolase	Source:UniProtKB/TrEMBL;Acc:W5QEE3]	1	2.25755	6.93204	-6.32886	2.24799e-05	0.000205767	2.88472
ENSOARG00000017460	RAC3	ras-related C3 botulinum toxin substrate 3 (rho family, small GTP binding protein Rac3)	Source:HGNC Symbol;Acc:HGNC:9803]	11	4.72131	1.3999	-6.32758	2.25268e-05	0.000206054	2.91603
ENSOARG00000009345	UBE2R2	ubiquitin-conjugating enzyme E2R 2	Source:HGNC Symbol;Acc:HGNC:19907]	2	-2.26494	4.90434	6.32557	2.26002e-05	0.000206584	2.92337
ENSOARG00000006916	TXN	Ovis aries thioredoxin (TXN), mRNA.	Source:RefSeq mRNA;Acc:NM_001009421]	2	2.68729	7.19088	-6.32447	2.26405e-05	0.000206811	2.87907
ENSOARG00000015686	PRKCA	protein kinase C, alpha	Source:HGNC Symbol;Acc:HGNC:9393]	11	-5.65514	4.12107	6.32346	2.26779e-05	0.00020701	2.97041
ENSOARG00000020614	TRIP12	thyroid hormone receptor interactor 12	Source:HGNC Symbol;Acc:HGNC:12306]	2	-1.94168	7.79533	6.32039	2.27911e-05	0.000207901	2.87649
ENSOARG00000003962	CDK5R1	cyclin-dependent kinase 5, regulatory subunit 1 (p35)	Source:HGNC Symbol;Acc:HGNC:1775]	11	5.59896	1.47227	-6.31952	2.28235e-05	0.000208054	2.90494
ENSOARG00000008634		Uncharacterized protein	Source:UniProtKB/TrEMBL;Acc:W5PFP7]	2	3.1474	2.91394	-6.31377	2.30379e-05	0.000209864	2.99146
ENSOARG00000016244	NCKIPSD	NCK interacting protein with SH3 domain	Source:HGNC Symbol;Acc:HGNC:15486]	19	-5.21899	0.902952	6.31164	2.31176e-05	0.000210446	2.7912
ENSOARG00000019829	FGFR1OP2	FGFR1 oncogene partner 2	Source:HGNC Symbol;Acc:HGNC:23098]	3	-2.84579	5.13882	6.31071	2.31525e-05	0.00021062	2.88794
ENSOARG00000013337	KIAA0020	KIAA0020	Source:HGNC Symbol;Acc:HGNC:29676]	2	2.02993	5.93295	-6.30963	2.31936e-05	0.000210849	2.85723
ENSOARG00000001177				14	3.1251	3.8257	-6.30769	2.32665e-05	0.000211368	2.95266
ENSOARG00000004680	SH3PXD2A	SH3 and PX domains 2A	Source:HGNC Symbol;Acc:HGNC:23664]	22	-9.91376	-0.0029369	6.30716	2.32867e-05	0.000211407	2.36764
ENSOARG00000020940	SCNM1	sodium channel modifier 1	Source:HGNC Symbol;Acc:HGNC:23136]	1	-2.78308	3.6854	6.30335	2.34317e-05	0.000212433	2.95134
ENSOARG00000007458	HLA-DOB	major histocompatibility complex, class II, DO beta	Source:HGNC Symbol;Acc:HGNC:4937]	20	-4.67439	5.54224	6.30344	2.34282e-05	0.000212433	2.86471
ENSOARG00000009974	MPND	MPN domain containing	Source:HGNC Symbol;Acc:HGNC:25934]	5	2.55399	6.00241	-6.29958	2.35756e-05	0.000213592	2.84082
ENSOARG00000002729				6	2.80542	5.04118	-6.29676	2.36841e-05	0.00021443	2.87004
ENSOARG00000006762	ZNF318	zinc finger protein 318	Source:HGNC Symbol;Acc:HGNC:13578]	20	4.35503	5.44648	-6.29628	2.37028e-05	0.000214453	2.85576
ENSOARG00000005246	SAMD14	sterile alpha motif domain containing 14	Source:HGNC Symbol;Acc:HGNC:27312]	11	4.07332	1.67306	-6.29418	2.3784e-05	0.000214895	2.90886
ENSOARG00000018775	CBLB	Cbl proto-oncogene B, E3 ubiquitin protein ligase	Source:HGNC Symbol;Acc:HGNC:1542]	1	-2.43795	4.98325	6.29456	2.37693e-05	0.000214895	2.86854
ENSOARG00000018968	WDR36	WD repeat domain 36	Source:HGNC Symbol;Acc:HGNC:30696]	5	3.20378	5.28329	-6.29055	2.39249e-05	0.000216022	2.84967
ENSOARG00000005871	U2SURP	U2 snRNP-associated SURP domain containing	Source:HGNC Symbol;Acc:HGNC:30855]	1	3.22653	8.66083	-6.28896	2.39869e-05	0.000216435	2.82933
ENSOARG00000002067	ZPR1	ZPR1 zinc finger	Source:HGNC Symbol;Acc:HGNC:13051]	15	2.31462	6.02722	-6.2874	2.40482e-05	0.000216841	2.81955
ENSOARG00000025175	TOB2	protein Tob2	Source:RefSeq peptide;Acc:NP_001233138]	3	4.44939	6.27296	-6.28534	2.41288e-05	0.000217421	2.81713
ENSOARG00000016743		Uncharacterized protein	Source:UniProtKB/TrEMBL;Acc:W5Q5I7]	3	-3.99745	1.91897	6.28162	2.42758e-05	0.000218597	2.91257
ENSOARG00000020828	IL1RN	Uncharacterized protein	Source:UniProtKB/TrEMBL;Acc:W5QI35]	3	-5.54745	7.78334	6.27936	2.43654e-05	0.000219256	2.80811
ENSOARG00000003568	AKAP8	A kinase (PRKA) anchor protein 8	Source:HGNC Symbol;Acc:HGNC:378]	5	4.0582	7.58658	-6.27804	2.44179e-05	0.000219579	2.80555
ENSOARG00000020326	CTPS1	CTP synthase 1	Source:HGNC Symbol;Acc:HGNC:2519]	1	4.24178	5.58842	-6.27734	2.44457e-05	0.00021967	2.8194
ENSOARG00000016734	NUP54	nucleoporin 54kDa	Source:HGNC Symbol;Acc:HGNC:17359]	6	2.01138	4.90488	-6.27696	2.4461e-05	0.00021967	2.8424
ENSOARG00000019560		Uncharacterized protein	Source:UniProtKB/TrEMBL;Acc:W5QE62]	7	-6.53823	3.45395	6.2749	2.45431e-05	0.000220259	2.92343
ENSOARG00000006129	ZNF652	zinc finger protein 652	Source:HGNC Symbol;Acc:HGNC:29147]	11	-3.11795	3.82091	6.27424	2.45695e-05	0.000220347	2.8991
ENSOARG00000010852	DDR2	discoidin domain receptor tyrosine kinase 2	Source:HGNC Symbol;Acc:HGNC:2731]	1	-14.0724	-0.198914	6.2738	2.45873e-05	0.000220359	2.04439
ENSOARG00000003228	SLC2A6	solute carrier family 2 (facilitated glucose transporter), member 6	Source:HGNC Symbol;Acc:HGNC:11011]	3	-4.0678	4.85079	6.27307	2.46165e-05	0.000220371	2.84362
ENSOARG00000003196		Uncharacterized protein	Source:UniProtKB/TrEMBL;Acc:W5NZ07]	14	-5.77162	0.958785	6.27294	2.46218e-05	0.000220371	2.73506
ENSOARG00000002030	TMEM69	transmembrane protein 69	Source:HGNC Symbol;Acc:HGNC:28035]	1	-4.45677	2.18319	6.27248	2.46401e-05	0.000220387	2.9138
ENSOARG00000019581	TBC1D22A	TBC1 domain family, member 22A	Source:HGNC Symbol;Acc:HGNC:1309]	3	-3.11572	3.72674	6.26946	2.47619e-05	0.000221328	2.89593
ENSOARG00000003731	PSME3	proteasome (prosome, macropain) activator subunit 3 (PA28 gamma; Ki)	Source:HGNC Symbol;Acc:HGNC:9570]	11	2.04817	6.17274	-6.26463	2.49578e-05	0.000222929	2.78005
ENSOARG00000004684	RNF13	ring finger protein 13	Source:HGNC Symbol;Acc:HGNC:10057]	1	-3.37039	5.07919	6.26257	2.5042e-05	0.000223531	2.81288
ENSOARG00000007937	RRN3	RRN3 RNA polymerase I transcription factor homolog (S. cerevisiae)	Source:HGNC Symbol;Acc:HGNC:30346]	24	2.65422	5.94876	-6.26101	2.51058e-05	0.00022395	2.77865
ENSOARG00000019873	YRDC	yrdC N(6)-threonylcarbamoyltransferase domain containing	Source:HGNC Symbol;Acc:HGNC:28905]	1	2.44119	4.57502	-6.25855	2.52067e-05	0.000224249	2.83161
ENSOARG00000003980	SEC23IP	SEC23 interacting protein	Source:HGNC Symbol;Acc:HGNC:17018]	22	-2.38372	6.01237	6.25915	2.5182e-05	0.000224249	2.77402
ENSOARG00000007701	RALGAPA1	Ral GTPase activating protein, alpha subunit 1 (catalytic)	Source:HGNC Symbol;Acc:HGNC:17770]	18	-2.83472	5.58512	6.25955	2.51656e-05	0.000224249	2.7857
ENSOARG00000004414	CEBPA	CCAAT/enhancer binding protein (C/EBP), alpha	Source:HGNC Symbol;Acc:HGNC:1833]	14	-6.19018	1.3887	6.25857	2.52059e-05	0.000224249	2.79235
ENSOARG00000018471	HARS	histidyl-tRNA synthetase	Source:HGNC Symbol;Acc:HGNC:4816]	5	2.60228	5.31107	-6.25652	2.52908e-05	0.000224442	2.79091
ENSOARG00000013086	MCM3AP	minichromosome maintenance complex component 3 associated protein	Source:HGNC Symbol;Acc:HGNC:6946]	1	2.24857	7.57796	-6.25639	2.52959e-05	0.000224442	2.76986
ENSOARG00000017133	PCNA	proliferating cell nuclear antigen	Source:HGNC Symbol;Acc:HGNC:8729]	13	2.22424	6.73292	-6.25706	2.52684e-05	0.000224442	2.76628
ENSOARG00000018918	SNX24	sorting nexin 24	Source:HGNC Symbol;Acc:HGNC:21533]	5	-9.5103	-1.45947	6.25691	2.52744e-05	0.000224442	1.6698
ENSOARG00000001603	H-FABP	fatty acid-binding protein, heart	Source:RefSeq peptide;Acc:NP_001254813]	2	3.3679	3.47045	-6.25593	2.53152e-05	0.000224463	2.88579
ENSOARG00000016212	IP6K2	inositol hexakisphosphate kinase 2	Source:HGNC Symbol;Acc:HGNC:17313]	19	2.54491	4.66103	-6.25532	2.53402e-05	0.000224535	2.82108
ENSOARG00000008794		Uncharacterized protein	Source:UniProtKB/TrEMBL;Acc:W5PG70]	19	3.44965	5.6476	-6.25458	2.53711e-05	0.00022466	2.77979
ENSOARG00000001300	XYLB	xylulokinase homolog (H. influenzae)	Source:HGNC Symbol;Acc:HGNC:12839]	19	-5.55797	1.28202	6.25211	2.54736e-05	0.000225417	2.76689
ENSOARG00000012338		Glutamyl-tRNA(Gln) amidotransferase subunit C, mitochondrial	Source:UniProtKB/TrEMBL;Acc:W5PRZ0]	17	2.86198	2.59075	-6.25157	2.54962e-05	0.000225455	2.89482
ENSOARG00000006337	TMEM70	transmembrane protein 70	Source:HGNC Symbol;Acc:HGNC:26050]	9	-2.61885	4.0768	6.25119	2.55118e-05	0.000225455	2.8475
ENSOARG00000011130	SBNO2	strawberry notch homolog 2 (Drosophila)	Source:HGNC Symbol;Acc:HGNC:29158]	5	2.74641	7.42732	-6.24723	2.56777e-05	0.00022668	2.7538
ENSOARG00000004768	NACC2	NACC family member 2, BEN and BTB (POZ) domain containing	Source:HGNC Symbol;Acc:HGNC:23846]	3	-5.94113	0.570353	6.24707	2.56843e-05	0.00022668	2.60434
ENSOARG00000009476	DLG5	discs, large homolog 5 (Drosophila)	Source:HGNC Symbol;Acc:HGNC:2904]	25	3.79613	4.13978	-6.24548	2.57513e-05	0.00022712	2.83777
ENSOARG00000012085	TARS	threonyl-tRNA synthetase	Source:HGNC Symbol;Acc:HGNC:11572]	16	-1.9419	8.46651	6.24305	2.58536e-05	0.000227871	2.75332
ENSOARG00000008441				10	2.37159	4.26626	-6.24097	2.59418e-05	0.000228346	2.81967
ENSOARG00000013038	SON	SON DNA binding protein	Source:HGNC Symbol;Acc:HGNC:11183]	1	1.82434	9.33601	-6.24102	2.59396e-05	0.000228346	2.75278
ENSOARG00000009454	LYL1	lymphoblastic leukemia associated hematopoiesis regulator 1	Source:HGNC Symbol;Acc:HGNC:6734]	5	3.69523	2.77611	-6.24038	2.5967e-05	0.000228417	2.87775
ENSOARG00000014009	DUSP2	dual specificity phosphatase 2	Source:HGNC Symbol;Acc:HGNC:3068]	3	3.92804	7.09892	-6.23926	2.60143e-05	0.000228682	2.7387
ENSOARG00000004438				8	2.36613	9.16929	-6.23735	2.6096e-05	0.000228896	2.74623
ENSOARG00000018693	CSRP1	cysteine and glycine-rich protein 1	Source:HGNC Symbol;Acc:HGNC:2469]	12	2.33899	4.35461	-6.23756	2.60869e-05	0.000228896	2.80889
ENSOARG00000012889	CPSF2	cleavage and polyadenylation specific factor 2, 100kDa	Source:HGNC Symbol;Acc:HGNC:2325]	18	-1.82749	5.93306	6.23708	2.61074e-05	0.000228896	2.73856
ENSOARG00000012472	GP2	glycoprotein 2 (zymogen granule membrane)	Source:HGNC Symbol;Acc:HGNC:4441]	24	-10.2248	0.400804	6.23745	2.60918e-05	0.000228896	2.43262
ENSOARG00000012754	ATXN3	Ovis aries ataxin 3 (ATXN3), mRNA.	Source:RefSeq mRNA;Acc:NM_001130936]	18	-2.888	3.90537	6.23645	2.61343e-05	0.000228981	2.83336
ENSOARG00000000135	PBX2	pre-B-cell leukemia homeobox 2	Source:HGNC Symbol;Acc:HGNC:8633]	20	-2.47058	6.68216	6.2356	2.61707e-05	0.000229149	2.73047
ENSOARG00000012148	MANEA	mannosidase, endo-alpha	Source:HGNC Symbol;Acc:HGNC:21072]	8	-3.65978	2.32098	6.23507	2.61935e-05	0.000229198	2.86375
ENSOARG00000019123	BIK	BCL2-interacting killer (apoptosis-inducing)	Source:HGNC Symbol;Acc:HGNC:1051]	3	5.04164	2.23333	-6.23324	2.62721e-05	0.000229583	2.85538
ENSOARG00000001647	GLA	galactosidase, alpha	Source:HGNC Symbol;Acc:HGNC:4296]	X	-3.69392	4.24043	6.23342	2.62644e-05	0.000229583	2.81174
ENSOARG00000009837	PGM2	phosphoglucomutase 2	Source:HGNC Symbol;Acc:HGNC:8906]	6	2.55689	5.08392	-6.23229	2.63129e-05	0.000229789	2.76254
ENSOARG00000006251	CD109	CD109 molecule	Source:HGNC Symbol;Acc:HGNC:21685]	8	-8.70318	2.37336	6.23137	2.63524e-05	0.000229983	2.84777
ENSOARG00000006076	AKT3	v-akt murine thymoma viral oncogene homolog 3	Source:HGNC Symbol;Acc:HGNC:393]	12	-3.31757	4.7245	6.23055	2.63881e-05	0.000230143	2.78086
ENSOARG00000002594	CHM	choroideremia (Rab escort protein 1)	Source:HGNC Symbol;Acc:HGNC:1940]	X	-2.70809	3.12166	6.2297	2.64247e-05	0.000230212	2.85516
ENSOARG00000016912	SLC16A3	solute carrier family 16 (monocarboxylate transporter), member 3	Source:HGNC Symbol;Acc:HGNC:10924]	11	-3.12573	5.66243	6.22956	2.64305e-05	0.000230212	2.73459
ENSOARG00000001089	OXSR1	oxidative stress responsive 1	Source:HGNC Symbol;Acc:HGNC:8508]	19	3.53795	6.21876	-6.22819	2.64903e-05	0.000230474	2.72237
ENSOARG00000005746	MAP4K1	mitogen-activated protein kinase kinase kinase kinase 1	Source:HGNC Symbol;Acc:HGNC:6863]	14	2.75664	7.20176	-6.22807	2.64952e-05	0.000230474	2.72064
ENSOARG00000019445	TRAC	T cell receptor alpha constant	Source:HGNC Symbol;Acc:HGNC:12029]	7	-3.80817	7.68707	6.22561	2.66024e-05	0.000231255	2.7197
ENSOARG00000004301	STK39	serine threonine kinase 39	Source:HGNC Symbol;Acc:HGNC:17717]	2	-3.31375	3.0095	6.22134	2.67889e-05	0.000232724	2.84503
ENSOARG00000006631	TPR	translocated promoter region, nuclear basket protein	Source:HGNC Symbol;Acc:HGNC:12017]	12	-2.21471	8.05402	6.21794	2.69388e-05	0.000233874	2.70963
ENSOARG00000004575	LSM2	LSM2 homolog, U6 small nuclear RNA associated (S. cerevisiae)	Source:HGNC Symbol;Acc:HGNC:13940]	20	-3.67589	2.18065	6.21737	2.6964e-05	0.00023394	2.831
ENSOARG00000003768	VAMP7	Ovis aries vesicle-associated membrane protein 7 (VAMP7), mRNA.	Source:RefSeq mRNA;Acc:NM_001166204]	X	-2.72279	5.16899	6.21536	2.70529e-05	0.000234559	2.72986
ENSOARG00000005547	GTF3C5	general transcription factor IIIC, polypeptide 5, 63kDa	Source:HGNC Symbol;Acc:HGNC:4668]	3	2.51887	4.72759	-6.21136	2.72307e-05	0.000235793	2.7457
ENSOARG00000012506	HDDC3	HD domain containing 3	Source:HGNC Symbol;Acc:HGNC:30522]	18	-4.06249	2.22533	6.21172	2.7215e-05	0.000235793	2.82373
ENSOARG00000003745	PPID	peptidylprolyl isomerase D	Source:HGNC Symbol;Acc:HGNC:9257]	17	-1.89255	4.90666	6.21025	2.72806e-05	0.000236071	2.73323
ENSOARG00000016130	APC	adenomatous polyposis coli	Source:HGNC Symbol;Acc:HGNC:583]	7	-2.67747	5.25582	6.20632	2.74568e-05	0.000237288	2.71188
ENSOARG00000020577	RNF115	ring finger protein 115	Source:HGNC Symbol;Acc:HGNC:18154]	1	-3.07331	3.98716	6.20652	2.74477e-05	0.000237288	2.78053
ENSOARG00000001796	JDP2	Jun dimerization protein 2	Source:HGNC Symbol;Acc:HGNC:17546]	7	3.30042	3.62479	-6.20434	2.75461e-05	0.000237751	2.79685
ENSOARG00000012920	PRRC2C	proline-rich coiled-coil 2C	Source:HGNC Symbol;Acc:HGNC:24903]	12	-2.73547	7.93278	6.20443	2.75423e-05	0.000237751	2.68646
ENSOARG00000010680				10	3.61023	6.27367	-6.20265	2.76229e-05	0.000238259	2.67897
ENSOARG00000000067		Uncharacterized protein	Source:UniProtKB/TrEMBL;Acc:W5NPF6]	26	-2.76121	6.55887	6.20159	2.76708e-05	0.000238517	2.67482
ENSOARG00000004110	LACTB2	lactamase, beta 2	Source:HGNC Symbol;Acc:HGNC:18512]	9	-5.2977	1.59064	6.20072	2.77105e-05	0.000238705	2.75256
ENSOARG00000006070	TP53INP1	tumor protein p53 inducible nuclear protein 1	Source:HGNC Symbol;Acc:HGNC:18022]	9	2.21141	6.67031	-6.19901	2.77881e-05	0.000239219	2.67034
ENSOARG00000009772	SPTAN1	spectrin, alpha, non-erythrocytic 1	Source:HGNC Symbol;Acc:HGNC:11273]	3	2.50863	8.25522	-6.19793	2.78377e-05	0.000239406	2.67766
ENSOARG00000006187	MAPKAPK2	mitogen-activated protein kinase-activated protein kinase 2	Source:HGNC Symbol;Acc:HGNC:6887]	12	2.45022	6.96933	-6.19775	2.78459e-05	0.000239406	2.669
ENSOARG00000005707	C11orf58	chromosome 11 open reading frame 58	Source:HGNC Symbol;Acc:HGNC:16990]	15	-2.05206	8.01116	6.19492	2.79755e-05	0.000240365	2.67137
ENSOARG00000011481	PIM2	Pim-2 proto-oncogene, serine/threonine kinase	Source:HGNC Symbol;Acc:HGNC:8987]	X	-2.96975	3.97524	6.19326	2.8052e-05	0.000240867	2.7596
ENSOARG00000013866	KANSL3	KAT8 regulatory NSL complex subunit 3	Source:HGNC Symbol;Acc:HGNC:25473]	3	2.21621	6.39811	-6.19217	2.81022e-05	0.000241143	2.65896
ENSOARG00000015848				5	3.05811	4.14429	-6.18961	2.82205e-05	0.000242002	2.74414
ENSOARG00000009460	TMEM161A	transmembrane protein 161A	Source:HGNC Symbol;Acc:HGNC:26020]	5	3.87919	2.21454	-6.18878	2.82589e-05	0.000242175	2.7878
ENSOARG00000012040	DDX18	DEAD (Asp-Glu-Ala-Asp) box polypeptide 18	Source:HGNC Symbol;Acc:HGNC:2741]	2	2.99742	7.12067	-6.1862	2.83792e-05	0.000242893	2.65105
ENSOARG00000010305	HSDL1	hydroxysteroid dehydrogenase like 1	Source:HGNC Symbol;Acc:HGNC:16475]	14	2.64246	3.9813	-6.18647	2.83665e-05	0.000242893	2.7481
ENSOARG00000017186	PAPD5	PAP associated domain containing 5	Source:HGNC Symbol;Acc:HGNC:30758]	14	2.51873	6.73201	-6.18528	2.84222e-05	0.000242949	2.64741
ENSOARG00000003271	EGLN1	egl-9 family hypoxia-inducible factor 1	Source:HGNC Symbol;Acc:HGNC:1232]	25	-3.50429	4.57846	6.18535	2.84188e-05	0.000242949	2.71456
ENSOARG00000012938	RNASE4	ribonuclease, RNase A family, 4	Source:HGNC Symbol;Acc:HGNC:10047]	7	5.35543	4.57023	-6.18419	2.8473e-05	0.000243227	2.72261
ENSOARG00000004909		Uncharacterized protein	Source:UniProtKB/TrEMBL;Acc:W5P4A8]	8	3.38276	5.15542	-6.18233	2.856e-05	0.000243657	2.67942
ENSOARG00000020524	FMO5	flavin containing monooxygenase 5	Source:HGNC Symbol;Acc:HGNC:3773]	1	-6.31387	1.72695	6.18249	2.85529e-05	0.000243657	2.73741
ENSOARG00000016653	SFXN1	Ovis aries sideroflexin 1 (SFXN1), mRNA.	Source:RefSeq mRNA;Acc:NM_001126350]	7	1.93986	5.67621	-6.17744	2.87907e-05	0.000245468	2.64582
ENSOARG00000003669	ZFHX3	zinc finger homeobox 3	Source:HGNC Symbol;Acc:HGNC:777]	14	-6.55637	1.40182	6.17698	2.88124e-05	0.000245495	2.68229
ENSOARG00000002765		Uncharacterized protein	Source:UniProtKB/TrEMBL;Acc:W5NXN9]	JH923269.1	-7.31985	0.604216	6.17572	2.88721e-05	0.000245847	2.4762
ENSOARG00000008252	TMEM60	transmembrane protein 60	Source:HGNC Symbol;Acc:HGNC:21754]	4	-3.21397	2.55796	6.17507	2.89033e-05	0.000245955	2.77537
ENSOARG00000011512	ALDH9A1	aldehyde dehydrogenase 9 family, member A1	Source:HGNC Symbol;Acc:HGNC:412]	1	-2.86046	5.66638	6.17288	2.90073e-05	0.000246683	2.64254
ENSOARG00000014712	KIDINS220	kinase D-interacting substrate, 220kDa	Source:HGNC Symbol;Acc:HGNC:29508]	3	-2.28317	5.54564	6.1719	2.90542e-05	0.000246766	2.64208
ENSOARG00000016356	PPP1R11	protein phosphatase 1, regulatory (inhibitor) subunit 11	Source:HGNC Symbol;Acc:HGNC:9285]	20	-2.96284	4.07234	6.17211	2.90444e-05	0.000246766	2.72039
ENSOARG00000010348	TMEM156	transmembrane protein 156	Source:HGNC Symbol;Acc:HGNC:26260]	6	-4.21471	3.44453	6.17072	2.91109e-05	0.00024709	2.75188
ENSOARG00000007968	SEC24C	SEC24 family member C	Source:HGNC Symbol;Acc:HGNC:10705]	25	-2.43415	6.40006	6.1698	2.9155e-05	0.000247307	2.62168
ENSOARG00000001124	EIF4EBP1	eukaryotic translation initiation factor 4E binding protein 1	Source:HGNC Symbol;Acc:HGNC:3288]	26	-3.09362	4.98742	6.16856	2.92146e-05	0.000247552	2.66599
ENSOARG00000003686	WDTC1	WD and tetratricopeptide repeats 1	Source:HGNC Symbol;Acc:HGNC:29175]	2	-4.39464	3.84518	6.16842	2.92211e-05	0.000247552	2.73027
ENSOARG00000004163	CTDP1	CTD (carboxy-terminal domain, RNA polymerase II, polypeptide A) phosphatase, subunit 1	Source:HGNC Symbol;Acc:HGNC:2498]	23	2.38383	4.82948	-6.1657	2.93525e-05	0.000248507	2.66565
ENSOARG00000007293	ABCB9	ATP-binding cassette, sub-family B (MDR/TAP), member 9	Source:HGNC Symbol;Acc:HGNC:50]	17	5.67907	-0.117758	-6.16525	2.93743e-05	0.000248533	2.27516
ENSOARG00000008957	RALY	RALY heterogeneous nuclear ribonucleoprotein	Source:HGNC Symbol;Acc:HGNC:15921]	13	-2.55867	6.37964	6.15824	2.97149e-05	0.000251255	2.60282
ENSOARG00000016128	MAP3K2	mitogen-activated protein kinase kinase kinase 2	Source:HGNC Symbol;Acc:HGNC:6854]	2	3.64881	8.54439	-6.15615	2.98176e-05	0.000251964	2.60952
ENSOARG00000016210	NAB1	NGFI-A binding protein 1 (EGR1 binding protein 1)	Source:HGNC Symbol;Acc:HGNC:7626]	2	3.12275	5.20181	-6.15471	2.98884e-05	0.000252241	2.62872
ENSOARG00000002565	MKNK1	MAP kinase interacting serine/threonine kinase 1	Source:HGNC Symbol;Acc:HGNC:7110]	1	-2.23732	4.3406	6.1549	2.98792e-05	0.000252241	2.67461
ENSOARG00000018728		Uncharacterized protein	Source:UniProtKB/TrEMBL;Acc:W5QBL3]	12	5.47704	2.6905	-6.14889	3.01763e-05	0.000254406	2.73459
ENSOARG00000007525	AXL	AXL receptor tyrosine kinase	Source:HGNC Symbol;Acc:HGNC:905]	14	-9.42627	1.41332	6.14876	3.01832e-05	0.000254406	2.6093
ENSOARG00000019152	TINF2	TERF1 (TRF1)-interacting nuclear factor 2	Source:HGNC Symbol;Acc:HGNC:11824]	7	3.34307	7.00829	-6.14558	3.03415e-05	0.000255579	2.58289
ENSOARG00000016394	KDM3B	lysine (K)-specific demethylase 3B	Source:HGNC Symbol;Acc:HGNC:1337]	5	-2.19177	7.31684	6.14327	3.04574e-05	0.000256393	2.58074
ENSOARG00000020158	PTPRB	protein tyrosine phosphatase, receptor type, B	Source:HGNC Symbol;Acc:HGNC:9665]	3	-4.8024	3.8455	6.13859	3.06936e-05	0.000258218	2.6843
ENSOARG00000010328	DNASE2	deoxyribonuclease II, lysosomal	Source:HGNC Symbol;Acc:HGNC:2960]	5	3.85441	5.17664	-6.1366	3.07945e-05	0.00025874	2.60254
ENSOARG00000019127	NOP9	NOP9 nucleolar protein	Source:HGNC Symbol;Acc:HGNC:19826]	7	2.52458	5.51101	-6.13679	3.07851e-05	0.00025874	2.58528
ENSOARG00000003626	NUMA1	nuclear mitotic apparatus protein 1	Source:HGNC Symbol;Acc:HGNC:8059]	15	-2.38274	7.68637	6.13382	3.09363e-05	0.000259767	2.56758
ENSOARG00000013658	TBC1D7	TBC1 domain family, member 7	Source:HGNC Symbol;Acc:HGNC:21066]	20	-3.09203	2.8014	6.13333	3.0961e-05	0.000259811	2.70911
ENSOARG00000000473	GPR114	G protein-coupled receptor 114	Source:HGNC Symbol;Acc:HGNC:19010]	14	5.07648	7.62799	-6.13209	3.10243e-05	0.000260127	2.56467
ENSOARG00000012091	EBAG9	estrogen receptor binding site associated, antigen, 9	Source:HGNC Symbol;Acc:HGNC:3123]	9	-3.24558	3.28023	6.13183	3.10378e-05	0.000260127	2.69428
ENSOARG00000008869	FUS	FUS RNA binding protein	Source:HGNC Symbol;Acc:HGNC:4010]	24	3.06123	9.70927	-6.13099	3.10809e-05	0.000260161	2.57178
ENSOARG00000003079	RLTPR	RGD motif, leucine rich repeats, tropomodulin domain and proline-rich containing	Source:HGNC Symbol;Acc:HGNC:27089]	14	2.04885	6.33233	-6.13117	3.10716e-05	0.000260161	2.55764
ENSOARG00000020435	CCDC30	coiled-coil domain containing 30	Source:HGNC Symbol;Acc:HGNC:26103]	1	-4.16864	2.36236	6.12744	3.12637e-05	0.000261526	2.6973
ENSOARG00000003247	GNS	glucosamine (N-acetyl)-6-sulfatase	Source:HGNC Symbol;Acc:HGNC:4422]	3	-2.7478	4.82443	6.12684	3.12945e-05	0.00026162	2.60279
ENSOARG00000014597	DFFB	DNA fragmentation factor, 40kDa, beta polypeptide (caspase-activated DNase)	Source:HGNC Symbol;Acc:HGNC:2773]	12	-3.93042	2.11478	6.12078	3.16097e-05	0.000264089	2.67953
ENSOARG00000013565	ARF4	Ovis aries ADP-ribosylation factor 4 (ARF4), mRNA.	Source:RefSeq mRNA;Acc:NM_001162546]	19	2.4005	7.81918	-6.11997	3.16518e-05	0.000264275	2.54554
ENSOARG00000012308	TBC1D25	TBC1 domain family, member 25	Source:HGNC Symbol;Acc:HGNC:8092]	X	-2.32962	3.91317	6.11824	3.17426e-05	0.000264867	2.64016
ENSOARG00000002106	TTC28	tetratricopeptide repeat domain 28	Source:HGNC Symbol;Acc:HGNC:29179]	17	4.55787	0.816564	-6.1174	3.17869e-05	0.00026507	2.50547
ENSOARG00000012400	EPHA2	EPH receptor A2	Source:HGNC Symbol;Acc:HGNC:3386]	2	8.46798	3.09924	-6.11194	3.20749e-05	0.000267241	2.67573
ENSOARG00000003509		Uncharacterized protein	Source:UniProtKB/TrEMBL;Acc:W5P001]	5	-3.22905	3.30727	6.1117	3.20874e-05	0.000267241	2.66161
ENSOARG00000000780	SLC2A4RG	SLC2A4 regulator	Source:HGNC Symbol;Acc:HGNC:15930]	JH922713.1	5.2478	0.508107	-6.11093	3.21285e-05	0.000267416	2.40385
ENSOARG00000014988	AHNAK	AHNAK nucleoprotein	Source:HGNC Symbol;Acc:HGNC:347]	21	2.98083	10.1524	-6.10948	3.22055e-05	0.00026789	2.53738
ENSOARG00000009939	SYNGAP1	synaptic Ras GTPase activating protein 1	Source:HGNC Symbol;Acc:HGNC:11497]	20	4.62569	4.63564	-6.10702	3.23371e-05	0.00026834	2.5837
ENSOARG00000006274	NHP2	NHP2 ribonucleoprotein	Source:HGNC Symbol;Acc:HGNC:14377]	5	2.64772	4.41389	-6.10767	3.23024e-05	0.00026834	2.59312
ENSOARG00000021075		Uncharacterized protein	Source:UniProtKB/TrEMBL;Acc:W5QIU6]	3	-2.53871	4.72868	6.10658	3.23605e-05	0.00026834	2.57341
ENSOARG00000004401		Uncharacterized protein	Source:UniProtKB/TrEMBL;Acc:W5P2R0]	13	-3.25682	5.55215	6.10665	3.23569e-05	0.00026834	2.53597
ENSOARG00000007908	MMP9	Uncharacterized protein	Source:UniProtKB/TrEMBL;Acc:W5PDH4]	13	-5.22292	2.65144	6.10791	3.22892e-05	0.00026834	2.67007
ENSOARG00000002796		Uncharacterized protein	Source:UniProtKB/TrEMBL;Acc:W5NXS0]	19	3.50185	5.76162	-6.10568	3.24088e-05	0.000268406	2.52859
ENSOARG00000008717	XRCC1	X-ray repair complementing defective repair in Chinese hamster cells 1	Source:HGNC Symbol;Acc:HGNC:12828]	14	-2.41069	4.50321	6.10579	3.2403e-05	0.000268406	2.58516
ENSOARG00000010447	EHD1	EH-domain containing 1	Source:HGNC Symbol;Acc:HGNC:3242]	21	2.68673	7.16635	-6.10258	3.25755e-05	0.000269619	2.51191
ENSOARG00000015742	IL16	interleukin 16	Source:HGNC Symbol;Acc:HGNC:5980]	18	-2.83589	5.68107	6.10022	3.27029e-05	0.000270506	2.51932
ENSOARG00000002278	MAGEF1	melanoma antigen family F, 1	Source:HGNC Symbol;Acc:HGNC:29639]	1	-4.42232	2.0938	6.0986	3.27908e-05	0.000271064	2.64201
ENSOARG00000014736	SPIRE2	spire-type actin nucleation factor 2	Source:HGNC Symbol;Acc:HGNC:30623]	14	3.34891	2.97696	-6.09703	3.28761e-05	0.000271498	2.64848
ENSOARG00000008642	MRTO4	mRNA turnover 4 homolog (S. cerevisiae)	Source:HGNC Symbol;Acc:HGNC:18477]	23	3.13355	5.08811	-6.09688	3.28842e-05	0.000271498	2.53871
ENSOARG00000008006	RNF217	ring finger protein 217	Source:HGNC Symbol;Acc:HGNC:21487]	8	4.81868	2.40007	-6.0965	3.2905e-05	0.000271502	2.64957
ENSOARG00000021103	AP5M1	adaptor-related protein complex 5, mu 1 subunit	Source:HGNC Symbol;Acc:HGNC:20192]	7	-2.81753	3.74095	6.09465	3.30059e-05	0.000272028	2.61197
ENSOARG00000016844	GBE1	glucan (1,4-alpha-), branching enzyme 1	Source:HGNC Symbol;Acc:HGNC:4180]	1	-3.36133	4.85175	6.09458	3.30097e-05	0.000272028	2.54859
ENSOARG00000014837	MGMT	O-6-methylguanine-DNA methyltransferase	Source:HGNC Symbol;Acc:HGNC:7059]	22	4.92099	2.54628	-6.0942	3.30302e-05	0.000272029	2.64826
ENSOARG00000013398	BANK1	B-cell scaffold protein with ankyrin repeats 1	Source:HGNC Symbol;Acc:HGNC:18233]	6	6.21132	5.5066	-6.09119	3.31956e-05	0.000273193	2.52328
ENSOARG00000000941				1	2.33953	6.95379	-6.09088	3.32125e-05	0.000273193	2.49107
ENSOARG00000018475	HMOX1	heme oxygenase (decycling) 1	Source:HGNC Symbol;Acc:HGNC:5013]	3	-5.22924	4.67176	6.08932	3.32986e-05	0.000273731	2.55525
ENSOARG00000013001	PPP6C	protein phosphatase 6, catalytic subunit	Source:HGNC Symbol;Acc:HGNC:9323]	3	1.8116	5.69998	-6.08854	3.33418e-05	0.000273846	2.49673
ENSOARG00000016782	DNAJC10	DnaJ (Hsp40) homolog, subfamily C, member 10	Source:HGNC Symbol;Acc:HGNC:24637]	2	-3.51591	5.5756	6.08832	3.33538e-05	0.000273846	2.50452
ENSOARG00000006252	RRNAD1	ribosomal RNA adenine dimethylase domain containing 1	Source:HGNC Symbol;Acc:HGNC:24273]	1	-2.13996	3.95387	6.08738	3.34056e-05	0.000274103	2.58776
ENSOARG00000017134	PDE7A	phosphodiesterase 7A	Source:HGNC Symbol;Acc:HGNC:8791]	9	2.78019	6.14489	-6.0858	3.34931e-05	0.00027455	2.48575
ENSOARG00000017368	DAZAP2	DAZ associated protein 2	Source:HGNC Symbol;Acc:HGNC:2684]	3	2.08087	8.38608	-6.08566	3.35013e-05	0.00027455	2.49181
ENSOARG00000000363	LLGL1	lethal giant larvae homolog 1 (Drosophila)	Source:HGNC Symbol;Acc:HGNC:6628]	11	2.63551	4.11847	-6.08514	3.35302e-05	0.000274617	2.57398
ENSOARG00000011094		Uncharacterized protein	Source:UniProtKB/TrEMBL;Acc:W5PN61]	8	-2.7663	3.33171	6.08421	3.35818e-05	0.000274871	2.61519
ENSOARG00000015361	DPH3	diphthamide biosynthesis 3	Source:HGNC Symbol;Acc:HGNC:27717]	1	2.57696	3.96453	-6.08133	3.37422e-05	0.000276014	2.57688
ENSOARG00000013206	HLX	H2.0-like homeobox	Source:HGNC Symbol;Acc:HGNC:4978]	12	-6.40046	1.08556	6.07993	3.38207e-05	0.000276486	2.48707
ENSOARG00000000025	ND3	NADH-ubiquinone oxidoreductase chain 3	Source:UniProtKB/Swiss-Prot;Acc:O78753]	MT	2.4372	10.8652	-6.07901	3.38724e-05	0.000276739	2.48896
ENSOARG00000011305	SLC16A5	solute carrier family 16 (monocarboxylate transporter), member 5	Source:HGNC Symbol;Acc:HGNC:10926]	11	-10.1392	-0.624992	6.07639	3.40202e-05	0.000277776	1.79423
ENSOARG00000020582	MGST1	microsomal glutathione S-transferase 1	Source:HGNC Symbol;Acc:HGNC:7061]	3	3.28472	3.31596	-6.07307	3.42077e-05	0.000279136	2.59823
ENSOARG00000009905	MBOAT1	membrane bound O-acyltransferase domain containing 1	Source:HGNC Symbol;Acc:HGNC:21579]	20	-5.25824	3.94718	6.07185	3.4277e-05	0.00027953	2.56936
ENSOARG00000003504	XPOT	exportin, tRNA	Source:HGNC Symbol;Acc:HGNC:12826]	3	-2.39011	7.04971	6.07046	3.43565e-05	0.000279835	2.45746
ENSOARG00000021042	MRPL9	mitochondrial ribosomal protein L9	Source:HGNC Symbol;Acc:HGNC:14277]	1	-2.689	5.12071	6.07075	3.434e-05	0.000279835	2.49244
ENSOARG00000009444		Uncharacterized protein	Source:UniProtKB/TrEMBL;Acc:W5PI67]	X	-3.63018	2.34693	6.06856	3.44646e-05	0.000280544	2.6061
ENSOARG00000011312	TMEM218	transmembrane protein 218	Source:HGNC Symbol;Acc:HGNC:27344]	21	-5.66334	0.0491832	6.06595	3.46142e-05	0.000281418	2.19251
ENSOARG00000000069	TIGD5	tigger transposable element derived 5	Source:HGNC Symbol;Acc:HGNC:18336]	9	4.29274	1.87626	-6.06291	3.47895e-05	0.000282325	2.5769
ENSOARG00000006539	SAMD1	sterile alpha motif domain containing 1	Source:HGNC Symbol;Acc:HGNC:17958]	5	2.96249	4.44409	-6.06319	3.47735e-05	0.000282325	2.525
ENSOARG00000014488	ERG	v-ets avian erythroblastosis virus E26 oncogene homolog	Source:HGNC Symbol;Acc:HGNC:3446]	1	-7.0271	0.661459	6.06318	3.4774e-05	0.000282325	2.36248
ENSOARG00000020912		Uncharacterized protein	Source:UniProtKB/TrEMBL;Acc:W5QIC2]	7	-3.2469	2.25576	6.06118	3.48896e-05	0.000282965	2.5923
ENSOARG00000000620	CCDC85C	coiled-coil domain containing 85C	Source:HGNC Symbol;Acc:HGNC:35459]	18	8.36591	0.0277302	-6.05935	3.49961e-05	0.000283656	2.13836
ENSOARG00000019187	SCUBE1	signal peptide, CUB domain, EGF-like 1	Source:HGNC Symbol;Acc:HGNC:13441]	3	6.98923	1.43149	-6.05828	3.50581e-05	0.000283986	2.50211
ENSOARG00000003703	AOAH	acyloxyacyl hydrolase (neutrophil)	Source:HGNC Symbol;Acc:HGNC:548]	4	5.51439	4.5334	-6.05629	3.51744e-05	0.000284754	2.50914
ENSOARG00000010051		Uncharacterized protein	Source:UniProtKB/TrEMBL;Acc:W5PK06]	1	-5.37968	1.2766	6.05524	3.52354e-05	0.000285075	2.49724
ENSOARG00000010908	ERP44	endoplasmic reticulum protein 44	Source:HGNC Symbol;Acc:HGNC:18311]	2	-2.70069	6.28342	6.05458	3.52745e-05	0.000285218	2.43058
ENSOARG00000010013	EMC1	ER membrane protein complex subunit 1	Source:HGNC Symbol;Acc:HGNC:28957]	2	2.15699	5.43281	-6.05244	3.53998e-05	0.000286057	2.44739
ENSOARG00000013644	PTOV1	prostate tumor overexpressed 1	Source:HGNC Symbol;Acc:HGNC:9632]	14	2.63131	3.29655	-6.04681	3.57331e-05	0.0002884	2.55572
ENSOARG00000002161		Uncharacterized protein	Source:UniProtKB/TrEMBL;Acc:W5NVT5]	1	-3.06356	3.28011	6.04499	3.58413e-05	0.000289098	2.55458
ENSOARG00000000685	B4GALT2	UDP-Gal:betaGlcNAc beta 1,4- galactosyltransferase, polypeptide 2	Source:HGNC Symbol;Acc:HGNC:925]	1	2.24134	4.60004	-6.04172	3.60367e-05	0.000290498	2.47404
ENSOARG00000001112	LINC00493	long intergenic non-protein coding RNA 493	Source:HGNC Symbol;Acc:HGNC:43430]	13	-4.20294	2.67709	6.03938	3.61772e-05	0.000291454	2.56179
ENSOARG00000005540	MPHOSPH9	M-phase phosphoprotein 9	Source:HGNC Symbol;Acc:HGNC:7215]	17	-3.64265	5.22685	6.03818	3.62492e-05	0.000291838	2.43559
ENSOARG00000007371	NIPSNAP3A	nipsnap homolog 3A (C. elegans)	Source:HGNC Symbol;Acc:HGNC:23619]	2	-5.02234	2.04504	6.03784	3.62702e-05	0.000291838	2.54666
ENSOARG00000012043		Uncharacterized protein	Source:UniProtKB/TrEMBL;Acc:W5PR36]	21	-10.4638	0.377121	6.0375	3.62907e-05	0.000291838	2.15751
ENSOARG00000019621	TOX4	TOX high mobility group box family member 4	Source:HGNC Symbol;Acc:HGNC:20161]	7	1.69964	7.12557	-6.03668	3.634e-05	0.000292059	2.40103
ENSOARG00000016274	SLC25A5	Ovis aries solute carrier family 25 (mitochondrial carrier; adenine nucleotide translocator), member 5 (SLC25A5), nuclear gene encoding mitochondrial protein, mRNA.	Source:RefSeq mRNA;Acc:NM_001127279]	X	3.24621	6.14696	-6.03625	3.63658e-05	0.000292089	2.40392
ENSOARG00000012373	ADAM19	ADAM metallopeptidase domain 19	Source:HGNC Symbol;Acc:HGNC:197]	5	-2.97298	5.60679	6.03582	3.6392e-05	0.000292124	2.41452
ENSOARG00000012071		Uncharacterized protein	Source:UniProtKB/TrEMBL;Acc:W5PR62]	3	-5.23705	2.63419	6.03506	3.64379e-05	0.000292316	2.55522
ENSOARG00000012451	GMPPB	GDP-mannose pyrophosphorylase B	Source:HGNC Symbol;Acc:HGNC:22932]	19	2.53887	5.50241	-6.03297	3.65652e-05	0.000293161	2.41221
ENSOARG00000016510		Uncharacterized protein	Source:UniProtKB/TrEMBL;Acc:W5Q4T6]	15	-6.60982	9.08975	6.03241	3.65991e-05	0.000293256	2.405
ENSOARG00000019430	RBM15	RNA binding motif protein 15	Source:HGNC Symbol;Acc:HGNC:14959]	1	2.77508	5.90695	-6.03119	3.66739e-05	0.00029362	2.39725
ENSOARG00000005010	TPP2	tripeptidyl peptidase II	Source:HGNC Symbol;Acc:HGNC:12016]	10	1.86613	6.55869	-6.03094	3.66887e-05	0.00029362	2.38931
ENSOARG00000015564	LRRC8B	leucine rich repeat containing 8 family, member B	Source:HGNC Symbol;Acc:HGNC:30692]	1	2.20157	5.55129	-6.02993	3.67507e-05	0.000293939	2.40479
ENSOARG00000010094	FCGR2B	low affinity immunoglobulin gamma Fc region receptor II-b precursor	Source:RefSeq peptide;Acc:NP_001132925]	1	-6.11334	3.38225	6.0283	3.68508e-05	0.000294563	2.52974
ENSOARG00000010972	CCDC9	coiled-coil domain containing 9	Source:HGNC Symbol;Acc:HGNC:24560]	14	3.04489	6.7356	-6.02622	3.69784e-05	0.000295406	2.38208
ENSOARG00000014619	MOB3A	MOB kinase activator 3A	Source:HGNC Symbol;Acc:HGNC:29802]	5	3.02145	6.40574	-6.02563	3.70151e-05	0.000295521	2.38126
ENSOARG00000007980	MSL2	male-specific lethal 2 homolog (Drosophila)	Source:HGNC Symbol;Acc:HGNC:25544]	1	1.93213	6.23093	-6.02419	3.7104e-05	0.000296053	2.37887
ENSOARG00000008448	CAB39L	calcium binding protein 39-like	Source:HGNC Symbol;Acc:HGNC:20290]	10	-5.23153	2.43138	6.02319	3.71654e-05	0.000296247	2.53514
ENSOARG00000008603	BCKDK	branched chain ketoacid dehydrogenase kinase	Source:HGNC Symbol;Acc:HGNC:16902]	24	-5.56408	2.17332	6.02307	3.71728e-05	0.000296247	2.52761
ENSOARG00000006239	TMEM50A	transmembrane protein 50A	Source:HGNC Symbol;Acc:HGNC:30590]	2	-2.36989	6.14127	6.02242	3.72134e-05	0.000296393	2.37766
ENSOARG00000003986	ITPA	inosine triphosphatase (nucleoside triphosphate pyrophosphatase)	Source:HGNC Symbol;Acc:HGNC:6176]	13	-2.11698	4.33014	6.0209	3.73074e-05	0.000296964	2.45408
ENSOARG00000014752	TOPORS	topoisomerase I binding, arginine/serine-rich, E3 ubiquitin protein ligase	Source:HGNC Symbol;Acc:HGNC:21653]	2	2.7824	8.24431	-6.02031	3.73441e-05	0.000297078	2.38136
ENSOARG00000003673	ZNF550	zinc finger protein 550	Source:HGNC Symbol;Acc:HGNC:28643]	14	5.10925	2.04838	-6.01937	3.74031e-05	0.000297266	2.51766
ENSOARG00000019288	ASB8	ankyrin repeat and SOCS box containing 8	Source:HGNC Symbol;Acc:HGNC:17183]	3	2.04853	5.23687	-6.01922	3.74123e-05	0.000297266	2.39983
ENSOARG00000016753	BCAS3	breast carcinoma amplified sequence 3	Source:HGNC Symbol;Acc:HGNC:14347]	11	3.40481	3.69789	-6.01784	3.74984e-05	0.000297653	2.48958
ENSOARG00000020571	TTBK2	tau tubulin kinase 2	Source:HGNC Symbol;Acc:HGNC:19141]	7	-2.95417	2.31564	6.01736	3.75281e-05	0.000297653	2.52567
ENSOARG00000005430		Uncharacterized protein	Source:UniProtKB/TrEMBL;Acc:W5P5X0]	14	-4.995	1.48294	6.01771	3.75064e-05	0.000297653	2.47135
ENSOARG00000007939	WDR1	WD repeat domain 1	Source:HGNC Symbol;Acc:HGNC:12754]	6	2.43391	8.21029	-6.01553	3.76432e-05	0.000298033	2.37323
ENSOARG00000003115	GALNT2	polypeptide N-acetylgalactosaminyltransferase 2	Source:HGNC Symbol;Acc:HGNC:4124]	25	-2.8233	4.2357	6.01578	3.76273e-05	0.000298033	2.45543
ENSOARG00000020446		Uncharacterized protein	Source:UniProtKB/TrEMBL;Acc:W5QGW3]	1	-4.19609	1.41473	6.01583	3.76244e-05	0.000298033	2.46605
ENSOARG00000016855	SLC23A2	solute carrier family 23 (ascorbic acid transporter), member 2	Source:HGNC Symbol;Acc:HGNC:10973]	13	-2.75836	3.31868	6.01154	3.78942e-05	0.000299664	2.49802
ENSOARG00000005330	PGS1	phosphatidylglycerophosphate synthase 1	Source:HGNC Symbol;Acc:HGNC:30029]	11	-3.04591	3.61908	6.01177	3.78796e-05	0.000299664	2.48379
ENSOARG00000019642	FAR2	fatty acyl CoA reductase 2	Source:HGNC Symbol;Acc:HGNC:25531]	3	-6.68419	0.795767	6.01087	3.7937e-05	0.000299824	2.32393
ENSOARG00000014201		Uncharacterized protein	Source:UniProtKB/TrEMBL;Acc:W5PXR5]	20	-2.54069	5.77	6.00913	3.80469e-05	0.000300514	2.36441
ENSOARG00000010014	SAP30BP	SAP30 binding protein	Source:HGNC Symbol;Acc:HGNC:30785]	11	2.45485	6.89367	-6.00743	3.81547e-05	0.000301187	2.35072
ENSOARG00000002081	MAST2	microtubule associated serine/threonine kinase 2	Source:HGNC Symbol;Acc:HGNC:19035]	1	-4.26111	2.84923	6.007	3.81825e-05	0.000301227	2.50782
ENSOARG00000017786	USE1	unconventional SNARE in the ER 1 homolog (S. cerevisiae)	Source:HGNC Symbol;Acc:HGNC:30882]	5	2.29932	5.25233	-6.00642	3.82192e-05	0.000301338	2.37798
ENSOARG00000004484	RGS14	regulator of G-protein signaling 14	Source:HGNC Symbol;Acc:HGNC:9996]	5	2.71146	6.19452	-6.00475	3.83261e-05	0.000302003	2.34745
ENSOARG00000011593	RAD1	RAD1 checkpoint DNA exonuclease	Source:HGNC Symbol;Acc:HGNC:9806]	16	-3.46983	1.71277	6.00307	3.84337e-05	0.000302671	2.47723
ENSOARG00000014729	CD68	CD68 molecule	Source:HGNC Symbol;Acc:HGNC:1693]	11	-3.54322	5.88529	6.00201	3.85015e-05	0.000303026	2.35043
ENSOARG00000008229	IFITM5	interferon induced transmembrane protein 5	Source:HGNC Symbol;Acc:HGNC:16644]	21	4.63308	1.80514	-6.00133	3.85454e-05	0.000303192	2.47496
ENSOARG00000003738	TXNL4B	thioredoxin-like 4B	Source:HGNC Symbol;Acc:HGNC:26041]	14	-5.94184	0.908308	6.00046	3.86015e-05	0.000303454	2.34697
ENSOARG00000017168	FASN	fatty acid synthase	Source:HGNC Symbol;Acc:HGNC:3594]	11	4.33168	6.15506	-5.99977	3.86455e-05	0.000303621	2.34382
ENSOARG00000000227		Uncharacterized protein	Source:UniProtKB/TrEMBL;Acc:W5NPY0]	7	2.84352	4.94696	-5.99507	3.89502e-05	0.000305833	2.37785
ENSOARG00000001350		Uncharacterized protein	Source:UniProtKB/TrEMBL;Acc:W5NTB9]	JH923343.1	-6.04505	3.82207	5.99289	3.90922e-05	0.000306768	2.44961
ENSOARG00000006661		Uncharacterized protein	Source:UniProtKB/TrEMBL;Acc:W5P9R2]	25	2.82269	3.48459	-5.99039	3.9256e-05	0.000307751	2.45469
ENSOARG00000008420	HSD17B10	hydroxysteroid (17-beta) dehydrogenase 10	Source:HGNC Symbol;Acc:HGNC:4800]	X	2.46951	5.55112	-5.98993	3.92859e-05	0.000307751	2.33747
ENSOARG00000020823	EIF4E2	eukaryotic translation initiation factor 4E family member 2	Source:HGNC Symbol;Acc:HGNC:3293]	2	2.0014	6.16605	-5.98964	3.93049e-05	0.000307751	2.32157
ENSOARG00000020559		Uncharacterized protein	Source:UniProtKB/TrEMBL;Acc:W5QH91]	1	-2.21776	4.71377	5.98957	3.931e-05	0.000307751	2.37889
ENSOARG00000007603		Uncharacterized protein	Source:UniProtKB/TrEMBL;Acc:W5PCJ3]	1	-3.21552	7.56591	5.98787	3.94215e-05	0.000308443	2.32225
ENSOARG00000018574		Uncharacterized protein	Source:UniProtKB/TrEMBL;Acc:W5QB45]	JH922398.1	3.57097	2.43554	-5.98713	3.94703e-05	0.000308643	2.47904
ENSOARG00000015716	COMMD8	COMM domain containing 8	Source:HGNC Symbol;Acc:HGNC:26036]	6	-2.65238	2.74431	5.98589	3.9552e-05	0.0003091	2.47501
ENSOARG00000021007	POGZ	pogo transposable element with ZNF domain	Source:HGNC Symbol;Acc:HGNC:18801]	1	3.04462	6.54785	-5.98201	3.98096e-05	0.000310801	2.30773
ENSOARG00000014042	MYO1B	myosin IB	Source:HGNC Symbol;Acc:HGNC:7596]	2	-8.18131	0.611301	5.98191	3.98163e-05	0.000310801	2.16511
ENSOARG00000002131	CAND1	cullin-associated and neddylation-dissociated 1	Source:HGNC Symbol;Acc:HGNC:30688]	3	1.87671	7.42443	-5.98108	3.98718e-05	0.000311051	2.30967
ENSOARG00000000705		Uncharacterized protein	Source:UniProtKB/TrEMBL;Acc:W5NRD6]	1	5.17552	1.67505	-5.98059	3.99041e-05	0.000311121	2.4314
ENSOARG00000019567		Uncharacterized protein	Source:UniProtKB/TrEMBL;Acc:W5QE68]	7	-3.6948	2.888	5.97877	4.00255e-05	0.000311885	2.46126
ENSOARG00000017441	NOD2	nucleotide-binding oligomerization domain containing 2	Source:HGNC Symbol;Acc:HGNC:5331]	14	-3.16346	2.96001	5.97589	4.02189e-05	0.000313025	2.45405
ENSOARG00000016847	COG7	component of oligomeric golgi complex 7	Source:HGNC Symbol;Acc:HGNC:18622]	24	-4.27989	2.65158	5.9761	4.0205e-05	0.000313025	2.46123
ENSOARG00000016092	COLGALT1	collagen beta(1-O)galactosyltransferase 1	Source:HGNC Symbol;Acc:HGNC:26182]	5	3.88485	5.49275	-5.97479	4.02931e-05	0.00031342	2.31908
ENSOARG00000001095	INTS3	integrator complex subunit 3	Source:HGNC Symbol;Acc:HGNC:26153]	1	-3.82887	4.26878	5.96946	4.06541e-05	0.000316043	2.37734
ENSOARG00000019625	RAB2B	RAB2B, member RAS oncogene family	Source:HGNC Symbol;Acc:HGNC:20246]	7	2.41191	4.39347	-5.96782	4.07656e-05	0.000316725	2.36199
ENSOARG00000009723	ESYT2	extended synaptotagmin-like protein 2	Source:HGNC Symbol;Acc:HGNC:22211]	4	3.00029	7.86108	-5.96724	4.08053e-05	0.000316848	2.28943
ENSOARG00000005416	MCM10	minichromosome maintenance complex component 10	Source:HGNC Symbol;Acc:HGNC:18043]	13	-2.60984	3.22556	5.96299	4.10967e-05	0.000318739	2.42279
ENSOARG00000006726	HSPB11	heat shock protein family B (small), member 11	Source:HGNC Symbol;Acc:HGNC:25019]	1	-7.21371	-0.496246	5.9632	4.10823e-05	0.000318739	1.83875
ENSOARG00000018926	EIF3D	eukaryotic translation initiation factor 3, subunit D	Source:HGNC Symbol;Acc:HGNC:3278]	3	1.894	8.54849	-5.9598	4.13166e-05	0.000320258	2.28117
ENSOARG00000007126	ING4	inhibitor of growth family, member 4	Source:HGNC Symbol;Acc:HGNC:19423]	3	-2.6668	5.47774	5.95838	4.14153e-05	0.000320836	2.28808
ENSOARG00000008689	GAN	gigaxonin	Source:HGNC Symbol;Acc:HGNC:4137]	14	4.04277	3.71757	-5.95657	4.15413e-05	0.000321625	2.3895
ENSOARG00000002164	PNPT1	polyribonucleotide nucleotidyltransferase 1	Source:HGNC Symbol;Acc:HGNC:23166]	3	2.30114	6.49009	-5.9556	4.16085e-05	0.000321958	2.26227
ENSOARG00000013382	PDE8A	phosphodiesterase 8A	Source:HGNC Symbol;Acc:HGNC:8793]	18	3.1174	4.84652	-5.95267	4.18131e-05	0.000323353	2.31171
ENSOARG00000002542	TRAV19	T cell receptor alpha variable 19	Source:HGNC Symbol;Acc:HGNC:12115]	JH921724.1	-5.69703	1.14758	5.95217	4.18483e-05	0.000323438	2.32421
ENSOARG00000012642	DARS2	aspartyl-tRNA synthetase 2, mitochondrial	Source:HGNC Symbol;Acc:HGNC:25538]	12	-3.59947	2.12798	5.94737	4.21863e-05	0.000325762	2.41114
ENSOARG00000020667	FCGR1A	Ovis aries Fc fragment of IgG, high affinity Ia, receptor (CD64) (FCGR1A), mRNA.	Source:RefSeq mRNA;Acc:NM_001139452]	1	-14.7133	1.52896	5.94721	4.2198e-05	0.000325762	2.2314
ENSOARG00000002880	TRPM5	transient receptor potential cation channel, subfamily M, member 5	Source:HGNC Symbol;Acc:HGNC:14323]	21	8.75817	-0.166343	-5.9459	4.22906e-05	0.000326287	1.89524
ENSOARG00000013718	ERLIN1	ER lipid raft associated 1	Source:HGNC Symbol;Acc:HGNC:16947]	22	3.24925	3.48251	-5.94305	4.24932e-05	0.00032766	2.37821
ENSOARG00000014452	EFTUD1	elongation factor Tu GTP binding domain containing 1	Source:HGNC Symbol;Acc:HGNC:25789]	18	-2.50308	4.54318	5.94141	4.26103e-05	0.000328373	2.30995
ENSOARG00000013406	AFF4	AF4/FMR2 family, member 4	Source:HGNC Symbol;Acc:HGNC:17869]	5	2.69754	6.20642	-5.93924	4.27656e-05	0.000329379	2.23755
ENSOARG00000003418	PTK2	protein tyrosine kinase 2	Source:HGNC Symbol;Acc:HGNC:9611]	9	2.09268	4.36085	-5.93873	4.28021e-05	0.00032947	2.31619
ENSOARG00000019556	KIAA1407	KIAA1407	Source:HGNC Symbol;Acc:HGNC:29272]	1	-4.90373	0.743345	5.9382	4.28402e-05	0.000329573	2.23621
ENSOARG00000019188				7	3.83117	6.663	-5.93648	4.29642e-05	0.000330335	2.23173
ENSOARG00000012646	GPRC5C	G protein-coupled receptor, class C, group 5, member C	Source:HGNC Symbol;Acc:HGNC:13309]	11	5.38238	5.94492	-5.93327	4.31965e-05	0.000331595	2.23947
ENSOARG00000010123	EML2	echinoderm microtubule associated protein like 2	Source:HGNC Symbol;Acc:HGNC:18035]	14	4.40479	3.06781	-5.93326	4.31968e-05	0.000331595	2.38313
ENSOARG00000019515	PLB1	phospholipase B1	Source:HGNC Symbol;Acc:HGNC:30041]	3	4.11694	2.49536	-5.93297	4.32182e-05	0.000331595	2.39314
ENSOARG00000006746	SHKBP1	SH3KBP1 binding protein 1	Source:HGNC Symbol;Acc:HGNC:19214]	14	1.80996	6.85087	-5.93284	4.32277e-05	0.000331595	2.22424
ENSOARG00000011272	PRDM1	PR domain containing 1, with ZNF domain	Source:HGNC Symbol;Acc:HGNC:9346]	8	-3.59789	5.56393	5.93216	4.3277e-05	0.000331782	2.24348
ENSOARG00000005826	ADAP1	ArfGAP with dual PH domains 1	Source:HGNC Symbol;Acc:HGNC:16486]	24	2.68817	5.22969	-5.93112	4.33521e-05	0.000332166	2.25449
ENSOARG00000012866		Histone H2A	Source:UniProtKB/TrEMBL;Acc:W5PT38]	1	-4.90004	3.46107	5.9305	4.33972e-05	0.000332321	2.36287
ENSOARG00000002319	PARG	poly (ADP-ribose) glycohydrolase	Source:HGNC Symbol;Acc:HGNC:8605]	25	-2.05398	5.14386	5.92927	4.3487e-05	0.000332817	2.25375
ENSOARG00000002015	XAB2	XPA binding protein 2	Source:HGNC Symbol;Acc:HGNC:14089]	5	1.95361	6.88969	-5.92697	4.36557e-05	0.000333724	2.21449
ENSOARG00000008934	TSPAN13	tetraspanin 13	Source:HGNC Symbol;Acc:HGNC:21643]	4	-3.45301	5.96573	5.92715	4.36421e-05	0.000333724	2.22341
ENSOARG00000000920	PNPLA7	patatin-like phospholipase domain containing 7	Source:HGNC Symbol;Acc:HGNC:24768]	3	2.5574	3.80503	-5.92484	4.38117e-05	0.000334608	2.32812
ENSOARG00000010707	RAN	Ovis aries RAN, member RAS oncogene family (RAN), mRNA.	Source:RefSeq mRNA;Acc:NM_001161876]	24	2.37788	8.22705	-5.92437	4.38468e-05	0.000334608	2.21953
ENSOARG00000001687	ARMCX3	armadillo repeat containing, X-linked 3	Source:HGNC Symbol;Acc:HGNC:24065]	X	-2.52671	5.14615	5.9247	4.38221e-05	0.000334608	2.24622
ENSOARG00000009647	RNF185	ring finger protein 185	Source:HGNC Symbol;Acc:HGNC:26783]	17	2.05958	4.02573	-5.92125	4.40772e-05	0.000336046	2.30753
ENSOARG00000014499	TXNDC15	Ovis aries thioredoxin domain containing 15 (TXNDC15), mRNA.	Source:RefSeq mRNA;Acc:NM_001163056]	5	-3.3634	3.42084	5.92113	4.40856e-05	0.000336046	2.3465
ENSOARG00000001874	UTRN	utrophin	Source:HGNC Symbol;Acc:HGNC:12635]	8	3.55961	6.29973	-5.91914	4.42337e-05	0.000336982	2.20319
ENSOARG00000015298	GRHL1	grainyhead-like 1 (Drosophila)	Source:HGNC Symbol;Acc:HGNC:17923]	3	6.91956	3.18851	-5.91786	4.43286e-05	0.000337126	2.35873
ENSOARG00000015344	FBXO8	F-box protein 8	Source:HGNC Symbol;Acc:HGNC:13587]	2	2.13457	3.85935	-5.91801	4.43176e-05	0.000337126	2.31363
ENSOARG00000000191	SULT1C4	sulfotransferase family, cytosolic, 1C, member 4	Source:HGNC Symbol;Acc:HGNC:11457]	3	-4.08657	1.85032	5.91822	4.4302e-05	0.000337126	2.35356
ENSOARG00000011371	ATXN7	ataxin 7	Source:HGNC Symbol;Acc:HGNC:10560]	19	3.36959	4.60763	-5.91625	4.44486e-05	0.000337652	2.2671
ENSOARG00000003575	CYB5B	cytochrome b5 type B (outer mitochondrial membrane)	Source:HGNC Symbol;Acc:HGNC:24374]	14	-1.65638	6.39125	5.91636	4.4441e-05	0.000337652	2.19586
ENSOARG00000005521	IL17RC	interleukin 17 receptor C	Source:HGNC Symbol;Acc:HGNC:18358]	19	-6.61129	1.606	5.91517	4.45299e-05	0.000338077	2.31445
ENSOARG00000018132	ING3	inhibitor of growth family, member 3	Source:HGNC Symbol;Acc:HGNC:14587]	4	2.65069	4.98422	-5.91431	4.4594e-05	0.000338178	2.2374
ENSOARG00000010184	AK4	adenylate kinase 4	Source:HGNC Symbol;Acc:HGNC:363]	1	-8.26981	-0.537911	5.91433	4.45928e-05	0.000338178	1.72734
ENSOARG00000020784	CA12	carbonic anhydrase XII	Source:HGNC Symbol;Acc:HGNC:1371]	7	-11.5903	2.66534	5.91164	4.4795e-05	0.000339509	2.35198
ENSOARG00000019062	SPNS3	spinster homolog 3 (Drosophila)	Source:HGNC Symbol;Acc:HGNC:28433]	11	-9.50974	0.139059	5.91124	4.48249e-05	0.000339542	1.94812
ENSOARG00000021165	ATP6V1D	ATPase, H+ transporting, lysosomal 34kDa, V1 subunit D	Source:HGNC Symbol;Acc:HGNC:13527]	7	-2.0036	4.01393	5.91056	4.48758e-05	0.000339734	2.29081
ENSOARG00000009928	TIMM10	translocase of inner mitochondrial membrane 10 homolog (yeast)	Source:HGNC Symbol;Acc:HGNC:11814]	15	2.60464	3.72033	-5.9091	4.49863e-05	0.000340183	2.3077
ENSOARG00000008780	SLC39A7	Ovis aries solute carrier family 39 (zinc transporter), member 7 (SLC39A7), mRNA.	Source:RefSeq mRNA;Acc:NM_001163602]	20	-3.38776	5.74314	5.90913	4.49843e-05	0.000340183	2.19784
ENSOARG00000008246	RB1	retinoblastoma 1	Source:HGNC Symbol;Acc:HGNC:9884]	10	-2.37582	5.42368	5.90823	4.50527e-05	0.000340492	2.20495
ENSOARG00000012231	FPGT	fucose-1-phosphate guanylyltransferase	Source:HGNC Symbol;Acc:HGNC:3825]	1	-4.855	1.81318	5.90781	4.50843e-05	0.000340538	2.33296
ENSOARG00000003028	DOCK2	dedicator of cytokinesis 2	Source:HGNC Symbol;Acc:HGNC:2988]	16	4.05794	7.05988	-5.90655	4.518e-05	0.000340687	2.18168
ENSOARG00000006803		Uncharacterized protein	Source:UniProtKB/TrEMBL;Acc:W5PA29]	19	2.88515	3.92881	-5.90718	4.51318e-05	0.000340687	2.29264
ENSOARG00000017121	KIF21B	kinesin family member 21B	Source:HGNC Symbol;Acc:HGNC:29442]	12	2.08144	6.53123	-5.90654	4.51809e-05	0.000340687	2.17903
ENSOARG00000015868		Uncharacterized protein	Source:UniProtKB/TrEMBL;Acc:W5Q2V0]	4	3.19262	6.5938	-5.90555	4.52559e-05	0.000340878	2.17833
ENSOARG00000012976		Uncharacterized protein	Source:UniProtKB/TrEMBL;Acc:W5PTW7]	5	-3.87082	2.26938	5.90553	4.52574e-05	0.000340878	2.34734
ENSOARG00000017581	KDM6B	lysine (K)-specific demethylase 6B	Source:HGNC Symbol;Acc:HGNC:29012]	11	4.46569	8.01281	-5.90509	4.52909e-05	0.000340937	2.18508
ENSOARG00000017832		Uncharacterized protein	Source:UniProtKB/TrEMBL;Acc:W5Q8U2]	3	-3.62839	1.84639	5.90414	4.53634e-05	0.00034129	2.33269
ENSOARG00000005336	RALGDS	ral guanine nucleotide dissociation stimulator	Source:HGNC Symbol;Acc:HGNC:9842]	3	2.63749	4.0575	-5.90317	4.54372e-05	0.000341459	2.27689
ENSOARG00000009312	RGL2	ral guanine nucleotide dissociation stimulator-like 2	Source:HGNC Symbol;Acc:HGNC:9769]	20	-2.26948	5.77501	5.90343	4.54177e-05	0.000341459	2.18587
ENSOARG00000015008	ZNF350	zinc finger protein 350	Source:HGNC Symbol;Acc:HGNC:16656]	14	2.36966	4.31755	-5.9016	4.55574e-05	0.000342169	2.25682
ENSOARG00000012774	MRPL49	mitochondrial ribosomal protein L49	Source:HGNC Symbol;Acc:HGNC:1176]	21	-2.08858	5.30675	5.89915	4.57464e-05	0.000343394	2.19467
ENSOARG00000007781	MEGF8	multiple EGF-like-domains 8	Source:HGNC Symbol;Acc:HGNC:3233]	14	3.10049	3.79835	-5.89872	4.57788e-05	0.000343444	2.28676
ENSOARG00000004808	ASB12	ankyrin repeat and SOCS box containing 12	Source:HGNC Symbol;Acc:HGNC:19763]	X	-4.54259	0.972767	5.89692	4.59178e-05	0.000344293	2.22304
ENSOARG00000015722	RAB5A	Ovis aries RAB5A, member RAS oncogene family (RAB5A), mRNA.	Source:RefSeq mRNA;Acc:NM_001161881]	1	2.36475	6.72313	-5.89339	4.6192e-05	0.000346154	2.15716
ENSOARG00000003179	TNRC18	trinucleotide repeat containing 18	Source:HGNC Symbol;Acc:HGNC:11962]	24	2.37797	5.31956	-5.89285	4.62337e-05	0.000346271	2.18409
ENSOARG00000002820	HCK	HCK proto-oncogene, Src family tyrosine kinase	Source:HGNC Symbol;Acc:HGNC:4840]	13	-4.33406	6.30455	5.89026	4.64357e-05	0.000347589	2.15571
ENSOARG00000015101	IMPA1	inositol(myo)-1(or 4)-monophosphatase 1	Source:HGNC Symbol;Acc:HGNC:6050]	9	-2.37829	4.78349	5.88909	4.65276e-05	0.000348081	2.20629
ENSOARG00000012449	CDK17	cyclin-dependent kinase 17	Source:HGNC Symbol;Acc:HGNC:8750]	3	2.34221	5.71805	-5.88808	4.66068e-05	0.000348477	2.1594
ENSOARG00000021054		Uncharacterized protein	Source:UniProtKB/TrEMBL;Acc:W5QIS6]	3	-4.60041	3.1331	5.8877	4.66365e-05	0.000348504	2.30742
ENSOARG00000000569	TNFAIP3	tumor necrosis factor, alpha-induced protein 3	Source:HGNC Symbol;Acc:HGNC:11896]	8	-3.27944	8.44887	5.88688	4.67011e-05	0.00034879	2.15691
ENSOARG00000003886		Uncharacterized protein	Source:UniProtKB/TrEMBL;Acc:W5P152]	9	2.28137	5.10275	-5.88435	4.69004e-05	0.000350083	2.17927
ENSOARG00000012499	ZFPM1	zinc finger protein, FOG family member 1	Source:HGNC Symbol;Acc:HGNC:19762]	14	4.06691	1.03404	-5.88213	4.70763e-05	0.000350993	2.21453
ENSOARG00000002775	RNF216	ring finger protein 216	Source:HGNC Symbol;Acc:HGNC:21698]	24	2.00416	5.42886	-5.88091	4.71733e-05	0.000350993	2.1574
ENSOARG00000020967	PSMD4	Ovis aries proteasome (prosome, macropain) 26S subunit, non-ATPase, 4 (PSMD4), mRNA.	Source:RefSeq mRNA;Acc:NM_001104928]	1	-2.41153	6.3937	5.88082	4.71806e-05	0.000350993	2.13644
ENSOARG00000009830	KMT2A	lysine (K)-specific methyltransferase 2A	Source:HGNC Symbol;Acc:HGNC:7132]	15	-2.92665	6.1792	5.88157	4.71208e-05	0.000350993	2.13997
ENSOARG00000006807	RAB20	RAB20, member RAS oncogene family	Source:HGNC Symbol;Acc:HGNC:18260]	10	-7.18835	0.916397	5.88137	4.71366e-05	0.000350993	2.14578
ENSOARG00000002217		Uncharacterized protein	Source:UniProtKB/TrEMBL;Acc:W5NW02]	14	-8.83525	3.43115	5.88159	4.71192e-05	0.000350993	2.29662
ENSOARG00000011502	AGPAT3	1-acylglycerol-3-phosphate O-acyltransferase 3	Source:HGNC Symbol;Acc:HGNC:326]	1	2.54806	5.20825	-5.87901	4.73246e-05	0.000351434	2.16831
ENSOARG00000007346	CEP70	centrosomal protein 70kDa	Source:HGNC Symbol;Acc:HGNC:29972]	1	-3.794	2.5676	5.87875	4.73455e-05	0.000351434	2.30594
ENSOARG00000012716				1	-4.91138	3.46489	5.87924	4.73062e-05	0.000351434	2.27843
ENSOARG00000013819	GRB10	growth factor receptor-bound protein 10	Source:HGNC Symbol;Acc:HGNC:4564]	4	-5.77325	0.358497	5.87925	4.73056e-05	0.000351434	2.0278
ENSOARG00000014297	PLEKHJ1	pleckstrin homology domain containing, family J member 1	Source:HGNC Symbol;Acc:HGNC:18211]	5	3.25754	5.08252	-5.87824	4.73861e-05	0.000351539	2.17267
ENSOARG00000020656	SP100	SP100 nuclear antigen	Source:HGNC Symbol;Acc:HGNC:11206]	2	-2.14389	6.85619	5.87784	4.74179e-05	0.000351579	2.13094
ENSOARG00000010605	ARCN1	archain 1	Source:HGNC Symbol;Acc:HGNC:649]	15	-1.80829	7.67442	5.87581	4.75808e-05	0.00035259	2.13326
ENSOARG00000006458	CWC27	CWC27 spliceosome-associated protein homolog (S. cerevisiae)	Source:HGNC Symbol;Acc:HGNC:10664]	16	-3.05285	3.81604	5.87466	4.76735e-05	0.000353081	2.24597
ENSOARG00000015676	PDIA6	protein disulfide isomerase family A, member 6	Source:HGNC Symbol;Acc:HGNC:30168]	3	-1.98985	7.48667	5.87363	4.77557e-05	0.000353297	2.12803
ENSOARG00000014000	VMP1	vacuole membrane protein 1	Source:HGNC Symbol;Acc:HGNC:29559]	11	-2.53377	5.87333	5.87378	4.77438e-05	0.000353297	2.13111
ENSOARG00000003423	CYP1A1	Ovis aries cytochrome P4501A1 (CYP1A1), mRNA.	Source:RefSeq mRNA;Acc:NM_001129905]	18	-20.215	0.668216	5.87242	4.7854e-05	0.000353828	1.69067
ENSOARG00000007280				17	4.48018	5.11272	-5.87156	4.79234e-05	0.000354144	2.16776
ENSOARG00000015050	MAP3K8	mitogen-activated protein kinase kinase kinase 8	Source:HGNC Symbol;Acc:HGNC:6860]	13	-4.1615	6.17322	5.87035	4.80208e-05	0.000354666	2.1242
ENSOARG00000009953		Uncharacterized protein	Source:UniProtKB/TrEMBL;Acc:W5PJQ4]	JH922015.1	-5.82993	1.69101	5.86888	4.81402e-05	0.000355154	2.26021
ENSOARG00000018364	OXLD1	oxidoreductase-like domain containing 1	Source:HGNC Symbol;Acc:HGNC:27901]	11	-6.48182	-0.0606562	5.86918	4.81159e-05	0.000355154	1.89033
ENSOARG00000002276	TRAV8-7	T cell receptor alpha variable 8-7 (non-functional)	Source:HGNC Symbol;Acc:HGNC:12152]	JH921597.1	-4.59747	1.86952	5.86679	4.83103e-05	0.000356212	2.27189
ENSOARG00000001634	PHACTR2	phosphatase and actin regulator 2	Source:HGNC Symbol;Acc:HGNC:20956]	8	-3.64512	2.71439	5.86494	4.84616e-05	0.000357129	2.28149
ENSOARG00000001816	ADAM9	ADAM metallopeptidase domain 9	Source:HGNC Symbol;Acc:HGNC:216]	26	-2.53968	5.00341	5.86338	4.85893e-05	0.000357872	2.15048
ENSOARG00000010281	DMPK	dystrophia myotonica-protein kinase	Source:HGNC Symbol;Acc:HGNC:2933]	14	5.16785	2.69737	-5.85948	4.89102e-05	0.000360037	2.27416
ENSOARG00000008729	ZNF131	zinc finger protein 131	Source:HGNC Symbol;Acc:HGNC:12915]	16	2.98736	5.89806	-5.85804	4.90293e-05	0.000360714	2.1046
ENSOARG00000007960		Uncharacterized protein	Source:UniProtKB/TrEMBL;Acc:W5PDN2]	21	-2.21467	5.05101	5.8577	4.9058e-05	0.000360725	2.1384
ENSOARG00000013419	SACS	sacsin molecular chaperone	Source:HGNC Symbol;Acc:HGNC:10519]	10	2.84873	5.8943	-5.85138	4.95846e-05	0.000364396	2.09398
ENSOARG00000005841	AIFM2	apoptosis-inducing factor, mitochondrion-associated, 2	Source:HGNC Symbol;Acc:HGNC:21411]	25	-4.81966	2.7953	5.85093	4.96223e-05	0.000364472	2.25776
ENSOARG00000011088		Uncharacterized protein	Source:UniProtKB/TrEMBL;Acc:W5PN57]	3	2.50241	5.26068	-5.84876	4.98045e-05	0.000365608	2.11163
ENSOARG00000015838		Uncharacterized protein	Source:UniProtKB/TrEMBL;Acc:W5Q2R9]	3	2.30321	4.08566	-5.84646	4.99986e-05	0.000366831	2.17959
ENSOARG00000002479	PIK3R5	phosphoinositide-3-kinase, regulatory subunit 5	Source:HGNC Symbol;Acc:HGNC:30035]	11	-2.31416	6.00768	5.84545	5.00834e-05	0.000367251	2.07991
ENSOARG00000008162	MAP4K3	mitogen-activated protein kinase kinase kinase kinase 3	Source:HGNC Symbol;Acc:HGNC:6865]	3	-3.91648	2.27496	5.84354	5.02461e-05	0.000368241	2.24962
ENSOARG00000007670	UBALD2	UBA-like domain containing 2	Source:HGNC Symbol;Acc:HGNC:28438]	11	-3.53044	5.53148	5.84247	5.03369e-05	0.000368704	2.09206
ENSOARG00000001034	GCFC2	GC-rich sequence DNA-binding factor 2	Source:HGNC Symbol;Acc:HGNC:1317]	3	-2.49704	3.29378	5.83747	5.07647e-05	0.000371632	2.21372
ENSOARG00000017479	LAMTOR4	late endosomal/lysosomal adaptor, MAPK and MTOR activator 4	Source:HGNC Symbol;Acc:HGNC:33772]	24	-2.20381	4.53916	5.83442	5.10268e-05	0.000373346	2.12913
ENSOARG00000015860	KSR1	kinase suppressor of ras 1	Source:HGNC Symbol;Acc:HGNC:6465]	11	-2.95376	3.76047	5.83156	5.12749e-05	0.000374955	2.17749
ENSOARG00000014589	ZFC3H1	zinc finger, C3H1-type containing	Source:HGNC Symbol;Acc:HGNC:28328]	3	-2.04818	6.29204	5.83095	5.13278e-05	0.000375136	2.05087
ENSOARG00000011990	MMS22L	MMS22-like, DNA repair protein	Source:HGNC Symbol;Acc:HGNC:21475]	8	-2.66238	3.85081	5.8291	5.14888e-05	0.000376105	2.16603
ENSOARG00000018520	PRPSAP2	phosphoribosyl pyrophosphate synthetase-associated protein 2	Source:HGNC Symbol;Acc:HGNC:9467]	11	-2.81337	5.57828	5.8282	5.15667e-05	0.000376468	2.066
ENSOARG00000004199	ANKRD27	ankyrin repeat domain 27 (VPS9 domain)	Source:HGNC Symbol;Acc:HGNC:25310]	14	-3.49793	3.273	5.82651	5.17148e-05	0.000377342	2.19796
ENSOARG00000019309	ATIC	5-aminoimidazole-4-carboxamide ribonucleotide formyltransferase/IMP cyclohydrolase	Source:HGNC Symbol;Acc:HGNC:794]	2	-2.3307	6.05096	5.82497	5.18499e-05	0.000377914	2.04426
ENSOARG00000011618	CLEC2L	C-type lectin domain family 2, member L	Source:HGNC Symbol;Acc:HGNC:21969]	4	-7.34862	1.74565	5.82527	5.18239e-05	0.000377914	2.18731
ENSOARG00000021073	GMFB	glia maturation factor, beta	Source:HGNC Symbol;Acc:HGNC:4373]	7	3.05807	5.06122	-5.82393	5.19415e-05	0.000378374	2.08258
ENSOARG00000009380		Uncharacterized protein	Source:UniProtKB/TrEMBL;Acc:W5PHZ5]	X	-9.31543	-0.278692	5.82358	5.19724e-05	0.000378392	1.64304
ENSOARG00000003129	ADAMTSL2	ADAMTS-like 2	Source:HGNC Symbol;Acc:HGNC:14631]	3	-9.33554	0.835519	5.82296	5.20271e-05	0.000378583	2.00516
ENSOARG00000007896		Uncharacterized protein	Source:UniProtKB/TrEMBL;Acc:W5PDF8]	X	2.78686	5.17042	-5.82232	5.20831e-05	0.000378666	2.07166
ENSOARG00000009204				20	-10.0364	-1.72266	5.82218	5.20954e-05	0.000378666	1.1122
ENSOARG00000000984	HIST1H2BD	histone cluster 1, H2bd	Source:HGNC Symbol;Acc:HGNC:4747]	20	-3.14784	2.57433	5.82043	5.22499e-05	0.000379582	2.21159
ENSOARG00000007105	PSMA8	proteasome (prosome, macropain) subunit, alpha type, 8	Source:HGNC Symbol;Acc:HGNC:22985]	23	5.1464	0.7714	-5.8189	5.23856e-05	0.000379946	2.05574
ENSOARG00000008896	PRKX	protein kinase, X-linked	Source:HGNC Symbol;Acc:HGNC:9441]	X	2.89302	4.42242	-5.81897	5.23796e-05	0.000379946	2.11264
ENSOARG00000004906	HAUS5	HAUS augmin-like complex, subunit 5	Source:HGNC Symbol;Acc:HGNC:29130]	14	2.06862	5.56125	-5.81892	5.23838e-05	0.000379946	2.04652
ENSOARG00000008510	TOR1B	torsin family 1, member B (torsin B)	Source:HGNC Symbol;Acc:HGNC:11995]	3	-2.8347	2.87438	5.81793	5.24721e-05	0.000380366	2.20001
ENSOARG00000008725	LCOR	ligand dependent nuclear receptor corepressor	Source:HGNC Symbol;Acc:HGNC:29503]	22	3.80201	3.57347	-5.81632	5.26154e-05	0.00038099	2.16632
ENSOARG00000005307	DDX21	DEAD (Asp-Glu-Ala-Asp) box helicase 21	Source:HGNC Symbol;Acc:HGNC:2744]	25	3.02769	8.68025	-5.81661	5.25892e-05	0.00038099	2.03823
ENSOARG00000020933	FAM214A	family with sequence similarity 214, member A	Source:HGNC Symbol;Acc:HGNC:25609]	7	-2.9024	5.11295	5.81389	5.28326e-05	0.000382354	2.06168
ENSOARG00000018397	SLC30A7	Ovis aries solute carrier family 30 (zinc transporter), member 7 (SLC30A7), mRNA.	Source:RefSeq mRNA;Acc:NM_001163598]	1	-3.21298	4.14275	5.81151	5.30462e-05	0.000383691	2.11866
ENSOARG00000015316	OXR1	oxidation resistance 1	Source:HGNC Symbol;Acc:HGNC:15822]	9	-2.75783	5.33406	5.80973	5.32067e-05	0.000384643	2.04234
ENSOARG00000000092	SHISA5	shisa family member 5	Source:HGNC Symbol;Acc:HGNC:30376]	19	-4.54998	2.91791	5.80812	5.33518e-05	0.000385482	2.18449
ENSOARG00000013081	MS4A1	membrane-spanning 4-domains, subfamily A, member 1	Source:HGNC Symbol;Acc:HGNC:7315]	15	4.45518	7.70787	-5.80626	5.35203e-05	0.000386007	2.01474
ENSOARG00000010201	ZDHHC5	zinc finger, DHHC-type containing 5	Source:HGNC Symbol;Acc:HGNC:18472]	15	2.43293	5.07556	-5.80699	5.34538e-05	0.000386007	2.05154
ENSOARG00000004562	ZADH2	zinc binding alcohol dehydrogenase domain containing 2	Source:HGNC Symbol;Acc:HGNC:28697]	23	2.37068	3.4212	-5.8064	5.35079e-05	0.000386007	2.15643
ENSOARG00000018405	PAM	peptidylglycine alpha-amidating monooxygenase	Source:HGNC Symbol;Acc:HGNC:8596]	5	-4.93535	3.57994	5.80604	5.35404e-05	0.000386007	2.15037
ENSOARG00000017048	PPM1D	protein phosphatase, Mg2+/Mn2+ dependent, 1D	Source:HGNC Symbol;Acc:HGNC:9277]	11	2.01552	4.88001	-5.80401	5.37248e-05	0.000386977	2.05604
ENSOARG00000005679	PAFAH2	platelet-activating factor acetylhydrolase 2, 40kDa	Source:HGNC Symbol;Acc:HGNC:8579]	2	-2.92557	3.22197	5.80392	5.37331e-05	0.000386977	2.16248
ENSOARG00000001621	MED14	mediator complex subunit 14	Source:HGNC Symbol;Acc:HGNC:2370]	X	2.09582	5.24917	-5.80183	5.39238e-05	0.000388141	2.03213
ENSOARG00000013516	UNC50	unc-50 homolog (C. elegans)	Source:HGNC Symbol;Acc:HGNC:16046]	3	-3.34542	4.15371	5.80082	5.40167e-05	0.000388599	2.10004
ENSOARG00000014933	HAS1	hyaluronan synthase 1	Source:HGNC Symbol;Acc:HGNC:4818]	14	10.5633	0.0572183	-5.79351	5.46916e-05	0.000393225	1.70957
ENSOARG00000019192	PLCXD2	phosphatidylinositol-specific phospholipase C, X domain containing 2	Source:HGNC Symbol;Acc:HGNC:26462]	1	6.03426	-0.327373	-5.79321	5.47189e-05	0.000393225	1.70378
ENSOARG00000004112	TRAF4	TNF receptor-associated factor 4	Source:HGNC Symbol;Acc:HGNC:12034]	11	2.15255	5.50834	-5.79249	5.47857e-05	0.000393493	2.00393
ENSOARG00000007312	SCPEP1	serine carboxypeptidase 1	Source:HGNC Symbol;Acc:HGNC:29507]	11	-2.17232	5.66545	5.79175	5.48544e-05	0.000393774	1.99698
ENSOARG00000014528		Ubiquitin carboxyl-terminal hydrolase	Source:UniProtKB/TrEMBL;Acc:W5PYQ0]	1	1.87941	6.27097	-5.78885	5.51255e-05	0.000395006	1.97892
ENSOARG00000019177		Uncharacterized protein	Source:UniProtKB/TrEMBL;Acc:W5QD02]	7	-2.36516	5.86738	5.78847	5.51612e-05	0.000395006	1.98601
ENSOARG00000015007	ARL1	Ovis aries ADP-ribosylation factor-like 1 (ARL1), mRNA.	Source:RefSeq mRNA;Acc:NM_001126367]	3	-2.40745	4.85812	5.78933	5.50808e-05	0.000395006	2.03282
ENSOARG00000018426	ZNF184	zinc finger protein 184	Source:HGNC Symbol;Acc:HGNC:12975]	20	-3.47163	3.7962	5.78858	5.51508e-05	0.000395006	2.104
ENSOARG00000001224		Uncharacterized protein	Source:UniProtKB/TrEMBL;Acc:W5NSY1]	JH922606.1	-4.69261	3.05943	5.78833	5.51745e-05	0.000395006	2.14779
ENSOARG00000021169	PIGH	phosphatidylinositol glycan anchor biosynthesis, class H	Source:HGNC Symbol;Acc:HGNC:8964]	7	-3.57345	1.74465	5.78751	5.52514e-05	0.000395345	2.14592
ENSOARG00000016983		Uncharacterized protein	Source:UniProtKB/TrEMBL;Acc:W5Q693]	15	-5.25608	0.81461	5.78404	5.5578e-05	0.000397468	2.0217
ENSOARG00000006774	CSNK2B	Ovis aries casein kinase 2, beta polypeptide (CSNK2B), mRNA.	Source:RefSeq mRNA;Acc:NM_001142511]	20	-2.69677	5.89264	5.78309	5.5668e-05	0.000397897	1.97809
ENSOARG00000015691	PLK4	polo-like kinase 4	Source:HGNC Symbol;Acc:HGNC:11397]	17	2.86557	4.10506	-5.78122	5.58447e-05	0.000398733	2.06939
ENSOARG00000019997	RAB1A	Ovis aries RAB1A, member RAS oncogene family (RAB1A), mRNA.	Source:RefSeq mRNA;Acc:NM_001161862]	3	-1.71849	5.97	5.78143	5.58251e-05	0.000398733	1.96967
ENSOARG00000015558	TBC1D5	TBC1 domain family, member 5	Source:HGNC Symbol;Acc:HGNC:19166]	1	3.72993	3.93765	-5.77899	5.60569e-05	0.00039939	2.07955
ENSOARG00000015290	LRRC47	leucine rich repeat containing 47	Source:HGNC Symbol;Acc:HGNC:29207]	12	2.49211	4.32758	-5.77913	5.60439e-05	0.00039939	2.05007
ENSOARG00000016728	NUP35	nucleoporin 35kDa	Source:HGNC Symbol;Acc:HGNC:29797]	2	2.13155	4.17496	-5.77963	5.5996e-05	0.00039939	2.06073
ENSOARG00000007186	RWDD4	RWD domain containing 4	Source:HGNC Symbol;Acc:HGNC:23750]	26	-3.4891	4.20699	5.7793	5.60273e-05	0.00039939	2.06076
ENSOARG00000017746	GSG2	germ cell associated 2 (haspin)	Source:HGNC Symbol;Acc:HGNC:19682]	11	2.26356	3.86087	-5.77848	5.61054e-05	0.000399522	2.08133
ENSOARG00000021092	ATG14	autophagy related 14	Source:HGNC Symbol;Acc:HGNC:19962]	7	3.25049	2.73318	-5.77748	5.62008e-05	0.00039968	2.13816
ENSOARG00000016348	SCRIB	scribbled planar cell polarity protein	Source:HGNC Symbol;Acc:HGNC:30377]	9	2.7497	4.07738	-5.77738	5.62103e-05	0.00039968	2.06438
ENSOARG00000013659	SETD4	SET domain containing 4	Source:HGNC Symbol;Acc:HGNC:1258]	1	2.70682	3.58921	-5.77731	5.62177e-05	0.00039968	2.09764
ENSOARG00000003386		Uncharacterized protein	Source:UniProtKB/TrEMBL;Acc:W5NZM0]	26	-2.61939	5.62789	5.77503	5.64353e-05	0.000401013	1.97086
ENSOARG00000008171	SUCLA2	succinate-CoA ligase, ADP-forming, beta subunit	Source:HGNC Symbol;Acc:HGNC:11448]	10	-2.24753	4.66765	5.77404	5.65307e-05	0.000401476	2.01829
ENSOARG00000003804	SEMA7A	semaphorin 7A, GPI membrane anchor (John Milton Hagen blood group)	Source:HGNC Symbol;Acc:HGNC:10741]	18	2.97427	5.41733	-5.77197	5.67301e-05	0.000402678	1.97533
ENSOARG00000008487	SETDB2	SET domain, bifurcated 2	Source:HGNC Symbol;Acc:HGNC:20263]	10	-2.48261	4.35819	5.77122	5.68026e-05	0.000402852	2.03426
ENSOARG00000019446	TNS1	tensin 1	Source:HGNC Symbol;Acc:HGNC:11973]	2	-8.2273	2.54346	5.77109	5.68152e-05	0.000402852	2.13353
ENSOARG00000018516	RAB10	Ovis aries RAB10, member RAS oncogene family (RAB10), mRNA.	Source:RefSeq mRNA;Acc:NM_001161861]	3	-2.25318	5.55885	5.77053	5.68694e-05	0.000403022	1.96556
ENSOARG00000020262	H2AFJ	H2A histone family, member J	Source:HGNC Symbol;Acc:HGNC:14456]	3	-2.57206	4.39169	5.76962	5.69574e-05	0.000403369	2.0293
ENSOARG00000019448	TRDC	T cell receptor delta constant	Source:HGNC Symbol;Acc:HGNC:12253]	7	-5.85147	7.51479	5.7694	5.69791e-05	0.000403369	1.95029
ENSOARG00000001236	TFIP11	tuftelin interacting protein 11	Source:HGNC Symbol;Acc:HGNC:17165]	17	3.16092	7.19792	-5.768	5.71146e-05	0.000404114	1.9454
ENSOARG00000007641	NOP2	NOP2 nucleolar protein	Source:HGNC Symbol;Acc:HGNC:7867]	3	3.2321	6.69601	-5.76742	5.71706e-05	0.000404295	1.94227
ENSOARG00000012809	PPP1R10	protein phosphatase 1, regulatory subunit 10	Source:HGNC Symbol;Acc:HGNC:9284]	20	2.32076	6.39861	-5.76697	5.72152e-05	0.000404395	1.94127
ENSOARG00000007650	SMIM11	small integral membrane protein 11	Source:HGNC Symbol;Acc:HGNC:1293]	1	-3.82032	1.78815	5.76477	5.74291e-05	0.000405692	2.11083
ENSOARG00000015415	HPCAL1	Ovis aries hippocalcin-like 1 (HPCAL1), mRNA.	Source:RefSeq mRNA;Acc:NM_001134306]	3	-3.35023	3.53473	5.76374	5.75305e-05	0.000406193	2.07963
ENSOARG00000004950	KLHDC10	kelch domain containing 10	Source:HGNC Symbol;Acc:HGNC:22194]	4	-3.09823	3.06178	5.76329	5.7574e-05	0.000406284	2.10274
ENSOARG00000001040	REXO2	RNA exonuclease 2	Source:HGNC Symbol;Acc:HGNC:17851]	15	-3.91191	2.89986	5.76275	5.76275e-05	0.000406446	2.11174
ENSOARG00000005999		Uncharacterized protein	Source:UniProtKB/TrEMBL;Acc:W5P7M2]	19	2.96065	3.59007	-5.75698	5.8196e-05	0.000410181	2.06351
ENSOARG00000010237	FCRLB	Fc receptor-like B	Source:HGNC Symbol;Acc:HGNC:26431]	1	-10.1207	0.12412	5.75675	5.82186e-05	0.000410181	1.72236
ENSOARG00000009644	NHLRC3	NHL repeat containing 3	Source:HGNC Symbol;Acc:HGNC:33751]	10	-2.231	4.754	5.7556	5.83336e-05	0.000410774	1.98107
ENSOARG00000000066				JH924052.1	5.18224	1.0529	-5.75199	5.86928e-05	0.000412648	2.01112
ENSOARG00000019053		Uncharacterized protein	Source:UniProtKB/TrEMBL;Acc:W5QCL5]	13	-1.97139	6.00455	5.75224	5.86683e-05	0.000412648	1.92088
ENSOARG00000018450	ATG4A	autophagy related 4A, cysteine peptidase	Source:HGNC Symbol;Acc:HGNC:16489]	X	-2.76711	3.24941	5.75214	5.86779e-05	0.000412648	2.07416
ENSOARG00000005137	EIF3B	eukaryotic translation initiation factor 3, subunit B	Source:HGNC Symbol;Acc:HGNC:3280]	24	2.31471	7.5012	-5.74695	5.91997e-05	0.000415992	1.9114
ENSOARG00000017358	PMEPA1	prostate transmembrane protein, androgen induced 1	Source:HGNC Symbol;Acc:HGNC:14107]	13	4.39262	4.36289	-5.74535	5.93606e-05	0.00041643	1.99708
ENSOARG00000002759		Uncharacterized protein	Source:UniProtKB/TrEMBL;Acc:W5NXN2]	AMGL01127303.1	2.03332	8.60043	-5.74491	5.94058e-05	0.00041643	1.91512
ENSOARG00000013003	RARS2	arginyl-tRNA synthetase 2, mitochondrial	Source:HGNC Symbol;Acc:HGNC:21406]	8	-3.80266	3.29128	5.74543	5.93528e-05	0.00041643	2.06305
ENSOARG00000011756	HSPH1	heat shock 105kDa/110kDa protein 1	Source:HGNC Symbol;Acc:HGNC:16969]	10	-4.23899	6.83014	5.74478	5.94185e-05	0.00041643	1.90444
ENSOARG00000002265		Uncharacterized protein	Source:UniProtKB/TrEMBL;Acc:W5NW50]	JH921597.1	-6.95735	4.10291	5.74518	5.93782e-05	0.00041643	2.02626
ENSOARG00000010682	PACSIN1	protein kinase C and casein kinase substrate in neurons 1	Source:HGNC Symbol;Acc:HGNC:8570]	20	5.00979	4.52896	-5.74245	5.96548e-05	0.000417647	1.98217
ENSOARG00000011992	LRSAM1	leucine rich repeat and sterile alpha motif containing 1	Source:HGNC Symbol;Acc:HGNC:25135]	3	2.79809	2.47734	-5.74261	5.96391e-05	0.000417647	2.08653
ENSOARG00000016234	CNIH4	cornichon family AMPA receptor auxiliary protein 4	Source:HGNC Symbol;Acc:HGNC:25013]	12	-2.63855	3.7251	5.74098	5.98046e-05	0.000418475	2.027
ENSOARG00000015019	B3GNT3	UDP-GlcNAc:betaGal beta-1,3-N-acetylglucosaminyltransferase 3	Source:HGNC Symbol;Acc:HGNC:13528]	5	4.05437	2.71941	-5.73942	5.99644e-05	0.000419152	2.07741
ENSOARG00000007258	UBE2O	ubiquitin-conjugating enzyme E2O	Source:HGNC Symbol;Acc:HGNC:29554]	11	-2.52936	4.30719	5.73955	5.99514e-05	0.000419152	1.98604
ENSOARG00000019108	SARS	seryl-tRNA synthetase	Source:HGNC Symbol;Acc:HGNC:10537]	1	2.09822	10.0259	-5.73853	6.00551e-05	0.000419566	1.90908
ENSOARG00000015984	ARIH2	ariadne RBR E3 ubiquitin protein ligase 2	Source:HGNC Symbol;Acc:HGNC:690]	19	1.65446	6.48443	-5.7373	6.01816e-05	0.00042023	1.88938
ENSOARG00000000322	MIEF2	mitochondrial elongation factor 2	Source:HGNC Symbol;Acc:HGNC:17920]	11	4.1693	2.48162	-5.7329	6.06353e-05	0.000423175	2.07125
ENSOARG00000003064	DYNC1H1	dynein, cytoplasmic 1, heavy chain 1	Source:HGNC Symbol;Acc:HGNC:2961]	18	2.07124	7.74189	-5.73089	6.08428e-05	0.000424401	1.88569
ENSOARG00000002007	SIGLEC1	sialic acid binding Ig-like lectin 1, sialoadhesin	Source:HGNC Symbol;Acc:HGNC:11127]	13	-6.10434	-0.0781139	5.72957	6.09804e-05	0.000425138	1.68191
ENSOARG00000012426	GOT1	glutamic-oxaloacetic transaminase 1, soluble	Source:HGNC Symbol;Acc:HGNC:4432]	22	-3.12192	3.09808	5.72502	6.14557e-05	0.000428227	2.03799
ENSOARG00000004215	NFATC1	nuclear factor of activated T-cells, cytoplasmic, calcineurin-dependent 1	Source:HGNC Symbol;Acc:HGNC:7775]	23	2.91237	5.68344	-5.72401	6.15616e-05	0.000428741	1.88187
ENSOARG00000011237		Uncharacterized protein	Source:UniProtKB/TrEMBL;Acc:W5PNL2]	22	-3.71443	1.8198	5.7232	6.16468e-05	0.00042911	2.04794
ENSOARG00000019623	ERGIC2	ERGIC and golgi 2	Source:HGNC Symbol;Acc:HGNC:30208]	3	-1.68627	5.42371	5.72153	6.18238e-05	0.000430117	1.88514
ENSOARG00000008764	CCDC43	coiled-coil domain containing 43	Source:HGNC Symbol;Acc:HGNC:26472]	11	2.9527	4.53152	-5.71875	6.21173e-05	0.000431933	1.93437
ENSOARG00000010448	ERBB3	erb-b2 receptor tyrosine kinase 3	Source:HGNC Symbol;Acc:HGNC:3431]	3	-6.14373	-0.42299	5.71817	6.21795e-05	0.000432139	1.57936
ENSOARG00000017628	ATG4B	autophagy related 4B, cysteine peptidase	Source:HGNC Symbol;Acc:HGNC:20790]	1	2.24338	5.33163	-5.71387	6.26379e-05	0.000435098	1.87704
ENSOARG00000004132		Uncharacterized protein	Source:UniProtKB/TrEMBL;Acc:W5P1W6]	14	-5.64442	1.39482	5.71191	6.28475e-05	0.000436326	1.99124
ENSOARG00000007608	QRICH2	glutamine rich 2	Source:HGNC Symbol;Acc:HGNC:25326]	11	4.55956	1.06586	-5.71142	6.29005e-05	0.000436466	1.9565
ENSOARG00000013107	THUMPD1	THUMP domain containing 1	Source:HGNC Symbol;Acc:HGNC:23807]	24	2.60264	5.41657	-5.71042	6.30078e-05	0.000436983	1.86762
ENSOARG00000010156	MBTPS1	membrane-bound transcription factor peptidase, site 1	Source:HGNC Symbol;Acc:HGNC:15456]	14	2.03097	6.26157	-5.7092	6.31398e-05	0.000437443	1.84259
ENSOARG00000001335	HIST1H1C	histone cluster 1, H1c	Source:HGNC Symbol;Acc:HGNC:4716]	20	-6.66815	2.88714	5.70923	6.31369e-05	0.000437443	2.02764
ENSOARG00000012746	IGSF1	immunoglobulin superfamily, member 1	Source:HGNC Symbol;Acc:HGNC:5948]	X	3.38405	4.08995	-5.70867	6.31976e-05	0.000437615	1.94893
ENSOARG00000010805	SNX3	sorting nexin 3	Source:HGNC Symbol;Acc:HGNC:11174]	8	-2.80509	4.40783	5.70613	6.34723e-05	0.000439061	1.92086
ENSOARG00000000471		Uncharacterized protein	Source:UniProtKB/TrEMBL;Acc:W5NQN6]	JH922965.1	-4.50015	4.86331	5.7064	6.34425e-05	0.000439061	1.89644
ENSOARG00000012066	SEMA4B	sema domain, immunoglobulin domain (Ig), transmembrane domain (TM) and short cytoplasmic domain, (semaphorin) 4B	Source:HGNC Symbol;Acc:HGNC:10730]	18	3.23542	2.98313	-5.70071	6.40638e-05	0.000442922	2.00402
ENSOARG00000019595		Uncharacterized protein	Source:UniProtKB/TrEMBL;Acc:W5QE97]	2	-4.3359	3.4176	5.70012	6.41275e-05	0.000443133	1.98233
ENSOARG00000011908	RNF135	ring finger protein 135	Source:HGNC Symbol;Acc:HGNC:21158]	11	2.50205	3.81313	-5.69885	6.42674e-05	0.000443869	1.95014
ENSOARG00000019377	C3orf17	chromosome 3 open reading frame 17	Source:HGNC Symbol;Acc:HGNC:24496]	1	3.8929	5.97445	-5.69787	6.43753e-05	0.000444153	1.83117
ENSOARG00000016277	GSKIP	GSK3B interacting protein	Source:HGNC Symbol;Acc:HGNC:20343]	18	-4.48353	1.87972	5.69794	6.43682e-05	0.000444153	2.00828
ENSOARG00000016707	MAEA	macrophage erythroblast attacher	Source:HGNC Symbol;Acc:HGNC:13731]	6	2.08638	4.72422	-5.69676	6.44982e-05	0.00044454	1.88261
ENSOARG00000004659	CNDP2	CNDP dipeptidase 2 (metallopeptidase M20 family)	Source:HGNC Symbol;Acc:HGNC:24437]	23	-1.6926	5.24074	5.69698	6.44734e-05	0.00044454	1.85313
ENSOARG00000015428	BAIAP3	BAI1-associated protein 3	Source:HGNC Symbol;Acc:HGNC:948]	24	3.71274	2.39341	-5.69625	6.45544e-05	0.000444697	2.01248
ENSOARG00000003303	STX12	syntaxin 12	Source:HGNC Symbol;Acc:HGNC:11430]	2	-3.25705	4.58273	5.69266	6.49526e-05	0.000447208	1.88727
ENSOARG00000007338	C1orf27	chromosome 1 open reading frame 27	Source:HGNC Symbol;Acc:HGNC:24299]	12	-3.08233	3.64957	5.69104	6.5133e-05	0.000448219	1.94827
ENSOARG00000019780	HDAC10	histone deacetylase 10	Source:HGNC Symbol;Acc:HGNC:18128]	3	4.40907	2.39259	-5.68767	6.55091e-05	0.000450574	1.99905
ENSOARG00000001131	GIMAP8	GTPase, IMAP family member 8	Source:HGNC Symbol;Acc:HGNC:21792]	4	-4.39751	4.97397	5.68347	6.5983e-05	0.000453472	1.85059
ENSOARG00000017680		Uncharacterized protein	Source:UniProtKB/TrEMBL;Acc:W5Q8C9]	JH922556.1	-6.42156	-0.397486	5.68333	6.59986e-05	0.000453472	1.51244
ENSOARG00000007337	MTCH2	mitochondrial carrier 2	Source:HGNC Symbol;Acc:HGNC:17587]	15	-2.64029	5.94905	5.68125	6.62333e-05	0.00045485	1.80006
ENSOARG00000001607	HSPBP1	HSPA (heat shock 70kDa) binding protein, cytoplasmic cochaperone 1	Source:HGNC Symbol;Acc:HGNC:24989]	14	2.60332	4.75825	-5.68023	6.63497e-05	0.000455414	1.85283
ENSOARG00000005375	FGFR2	fibroblast growth factor receptor 2	Source:HGNC Symbol;Acc:HGNC:3689]	22	3.17	5.27149	-5.67912	6.64757e-05	0.000455904	1.82344
ENSOARG00000017018	RBSN	rabenosyn, RAB effector	Source:HGNC Symbol;Acc:HGNC:20759]	19	2.16492	4.21251	-5.67878	6.6515e-05	0.000455904	1.88669
ENSOARG00000005680	WDR82	WD repeat domain 82	Source:HGNC Symbol;Acc:HGNC:28826]	19	1.68068	6.68557	-5.6787	6.65239e-05	0.000455904	1.78823
ENSOARG00000017905		Uncharacterized protein	Source:UniProtKB/TrEMBL;Acc:W5Q922]	25	1.98472	4.74045	-5.67683	6.67377e-05	0.00045691	1.84692
ENSOARG00000009005	C2CD3	C2 calcium-dependent domain containing 3	Source:HGNC Symbol;Acc:HGNC:24564]	15	-3.03872	4.09285	5.67682	6.67392e-05	0.00045691	1.89439
ENSOARG00000013496	MGAT4A	mannosyl (alpha-1,3-)-glycoprotein beta-1,4-N-acetylglucosaminyltransferase, isozyme A	Source:HGNC Symbol;Acc:HGNC:7047]	3	-2.44257	5.51644	5.67553	6.68866e-05	0.000457683	1.80304
ENSOARG00000019329	FN1	fibronectin 1	Source:HGNC Symbol;Acc:HGNC:3778]	2	-9.70305	9.10017	5.67399	6.70638e-05	0.00045866	1.79368
ENSOARG00000015203	DBNDD1	dysbindin (dystrobrevin binding protein 1) domain containing 1	Source:HGNC Symbol;Acc:HGNC:28455]	14	3.72402	2.28861	-5.67355	6.71138e-05	0.000458766	1.97644
ENSOARG00000006465				11	2.34662	9.22417	-5.67273	6.72078e-05	0.000459173	1.79297
ENSOARG00000001065		Uncharacterized protein	Source:UniProtKB/TrEMBL;Acc:W5NSG4]	JH922768.1	-5.8547	0.540738	5.67134	6.73682e-05	0.000460032	1.79544
ENSOARG00000020213	ATP1A1	Ovis aries ATPase, Na+/K+ transporting, alpha 1 polypeptide (ATP1A1), mRNA.	Source:RefSeq mRNA;Acc:NM_001009360]	1	-2.43568	8.11982	5.66983	6.75433e-05	0.000460992	1.78295
ENSOARG00000006116				15	5.53265	1.66057	-5.66882	6.76611e-05	0.000461559	1.94873
ENSOARG00000016072	C10orf2	chromosome 10 open reading frame 2	Source:HGNC Symbol;Acc:HGNC:1160]	22	2.26412	4.8111	-5.66758	6.78041e-05	0.00046206	1.82776
ENSOARG00000015160	ICK	intestinal cell (MAK-like) kinase	Source:HGNC Symbol;Acc:HGNC:21219]	20	-3.91889	0.828705	5.66764	6.77982e-05	0.00046206	1.85818
ENSOARG00000009462	TROVE2	TROVE domain family, member 2	Source:HGNC Symbol;Acc:HGNC:11313]	12	-4.04311	2.39953	5.6672	6.78493e-05	0.000462132	1.9654
ENSOARG00000012840	RPP21	ribonuclease P/MRP 21kDa subunit	Source:HGNC Symbol;Acc:HGNC:21300]	20	-2.73722	3.0997	5.666	6.79888e-05	0.000462846	1.93918
ENSOARG00000018250	ZDHHC15	zinc finger, DHHC-type containing 15	Source:HGNC Symbol;Acc:HGNC:20342]	X	-5.60505	0.4326	5.66458	6.8154e-05	0.000463733	1.76344
ENSOARG00000011354	KLHL21	kelch-like family member 21	Source:HGNC Symbol;Acc:HGNC:29041]	12	3.65704	2.33876	-5.66378	6.82482e-05	0.000463798	1.96021
ENSOARG00000005409	DHX8	DEAH (Asp-Glu-Ala-His) box polypeptide 8	Source:HGNC Symbol;Acc:HGNC:2749]	11	1.63245	6.90935	-5.66361	6.82682e-05	0.000463798	1.76299
ENSOARG00000013691	ZBTB4	zinc finger and BTB domain containing 4	Source:HGNC Symbol;Acc:HGNC:23847]	11	-2.41941	5.19968	5.66392	6.82314e-05	0.000463798	1.79969
ENSOARG00000007229	CD74	CD74 molecule, major histocompatibility complex, class II invariant chain	Source:HGNC Symbol;Acc:HGNC:1697]	5	3.12853	10.9401	-5.66316	6.83205e-05	0.000463917	1.78249
ENSOARG00000009523	SLC25A15	Ovis aries solute carrier family 25 (mitochondrial carrier; ornithine transporter) member 15 (SLC25A15), nuclear gene encoding mitochondrial protein, mRNA.	Source:RefSeq mRNA;Acc:NM_001127276]	10	2.93831	3.88912	-5.66107	6.8566e-05	0.000465228	1.88276
ENSOARG00000012334	PXK	PX domain containing serine/threonine kinase	Source:HGNC Symbol;Acc:HGNC:23326]	19	-2.32258	5.5838	5.66092	6.85835e-05	0.000465228	1.77578
ENSOARG00000019999	KRAS	Kirsten rat sarcoma viral oncogene homolog	Source:HGNC Symbol;Acc:HGNC:6407]	3	3.35379	5.69662	-5.65928	6.87774e-05	0.000466306	1.77103
ENSOARG00000010277	CDC42BPG	CDC42 binding protein kinase gamma (DMPK-like)	Source:HGNC Symbol;Acc:HGNC:29829]	21	3.42587	2.84312	-5.65882	6.88318e-05	0.000466437	1.93952
ENSOARG00000002287	NAP1L4	nucleosome assembly protein 1-like 4	Source:HGNC Symbol;Acc:HGNC:7640]	21	2.11262	5.99935	-5.65848	6.88716e-05	0.000466469	1.75799
ENSOARG00000011136	DPM2	dolichyl-phosphate mannosyltransferase polypeptide 2, regulatory subunit	Source:HGNC Symbol;Acc:HGNC:3006]	3	-3.07888	3.43755	5.65745	6.89943e-05	0.000467063	1.90643
ENSOARG00000017970		Uncharacterized protein	Source:UniProtKB/TrEMBL;Acc:W5Q999]	4	-5.35115	2.35384	5.65681	6.90692e-05	0.000467332	1.94931
ENSOARG00000013039	UNC119B	unc-119 homolog B (C. elegans)	Source:HGNC Symbol;Acc:HGNC:16488]	17	-3.689	2.73977	5.65638	6.91206e-05	0.000467442	1.93984
ENSOARG00000009920	MACC1	metastasis associated in colon cancer 1	Source:HGNC Symbol;Acc:HGNC:30215]	4	-8.24832	-0.450927	5.6529	6.95346e-05	0.000470003	1.43277
ENSOARG00000005353	ELFN1	extracellular leucine-rich repeat and fibronectin type III domain containing 1	Source:HGNC Symbol;Acc:HGNC:33154]	24	6.20671	-0.493732	-5.6517	6.96788e-05	0.000470739	1.46491
ENSOARG00000007125		Uncharacterized protein	Source:UniProtKB/TrEMBL;Acc:W5PB28]	21	-2.73354	3.93214	5.65017	6.98623e-05	0.000471739	1.85869
ENSOARG00000002892		Eukaryotic translation initiation factor 3 subunit C	Source:UniProtKB/TrEMBL;Acc:W5NY25]	24	-1.96799	8.12208	5.64964	6.99258e-05	0.000471929	1.74804
ENSOARG00000002754	PTX3	pentraxin 3, long	Source:HGNC Symbol;Acc:HGNC:9692]	1	-5.32013	5.01379	5.64785	7.01402e-05	0.000473135	1.79515
ENSOARG00000004576	CASZ1	castor zinc finger 1	Source:HGNC Symbol;Acc:HGNC:26002]	12	3.10054	2.9749	-5.64735	7.02009e-05	0.000473305	1.91599
ENSOARG00000007779	MANF	mesencephalic astrocyte-derived neurotrophic factor	Source:HGNC Symbol;Acc:HGNC:15461]	19	-2.71537	5.45687	5.64576	7.03934e-05	0.000474363	1.75465
ENSOARG00000020005	AQR	aquarius intron-binding spliceosomal factor	Source:HGNC Symbol;Acc:HGNC:29513]	7	-1.80217	6.33973	5.64322	7.07012e-05	0.000476196	1.72699
ENSOARG00000013765	TCF7	transcription factor 7 (T-cell specific, HMG-box)	Source:HGNC Symbol;Acc:HGNC:11639]	5	-2.78478	5.75361	5.64245	7.07948e-05	0.000476585	1.73858
ENSOARG00000003422	SMPD3	sphingomyelin phosphodiesterase 3, neutral membrane (neutral sphingomyelinase II)	Source:HGNC Symbol;Acc:HGNC:14240]	14	-4.84334	1.83297	5.64094	7.09781e-05	0.000477336	1.91437
ENSOARG00000017364		Uncharacterized protein	Source:UniProtKB/TrEMBL;Acc:W5Q7E4]	18	-5.3042	1.09712	5.64109	7.09607e-05	0.000477336	1.84626
ENSOARG00000019298	CD200	CD200 molecule	Source:HGNC Symbol;Acc:HGNC:7203]	1	-4.63059	0.985654	5.64014	7.10762e-05	0.000477754	1.84184
ENSOARG00000000079		Uncharacterized protein	Source:UniProtKB/TrEMBL;Acc:W5NPG8]	JH924719.1	5.51188	2.8219	-5.63971	7.11285e-05	0.000477864	1.91317
ENSOARG00000020383	BDH1	3-hydroxybutyrate dehydrogenase, type 1	Source:HGNC Symbol;Acc:HGNC:1027]	1	2.33658	5.65372	-5.63922	7.11887e-05	0.000478028	1.73634
ENSOARG00000003185	CANX	calnexin	Source:HGNC Symbol;Acc:HGNC:1473]	5	-1.72346	9.22376	5.63783	7.13597e-05	0.000478934	1.73253
ENSOARG00000014879	TAF4	TAF4 RNA polymerase II, TATA box binding protein (TBP)-associated factor, 135kDa	Source:HGNC Symbol;Acc:HGNC:11537]	13	1.88979	5.12882	-5.6358	7.16089e-05	0.000480364	1.7541
ENSOARG00000008426	KMO	kynurenine 3-monooxygenase (kynurenine 3-hydroxylase)	Source:HGNC Symbol;Acc:HGNC:6381]	12	-9.47641	0.554377	5.6353	7.16707e-05	0.000480537	1.67542
ENSOARG00000004779	HSD17B11	hydroxysteroid (17-beta) dehydrogenase 11	Source:HGNC Symbol;Acc:HGNC:22960]	6	-3.56295	3.6937	5.63236	7.20343e-05	0.000482732	1.84811
ENSOARG00000017706	CPOX	coproporphyrinogen oxidase	Source:HGNC Symbol;Acc:HGNC:2321]	1	-3.20945	3.19895	5.62961	7.23758e-05	0.000484776	1.8741
ENSOARG00000003961	HNRNPM	heterogeneous nuclear ribonucleoprotein M	Source:HGNC Symbol;Acc:HGNC:5046]	5	1.82718	9.04775	-5.6289	7.24643e-05	0.00048488	1.71648
ENSOARG00000002893	SRPK2	SRSF protein kinase 2	Source:HGNC Symbol;Acc:HGNC:11306]	4	-2.67235	4.58151	5.62907	7.24434e-05	0.00048488	1.77681
ENSOARG00000001833				21	2.61277	3.28971	-5.62725	7.26704e-05	0.000486015	1.86351
ENSOARG00000011531	RRP15	ribosomal RNA processing 15 homolog (S. cerevisiae)	Source:HGNC Symbol;Acc:HGNC:24255]	12	3.56564	5.71866	-5.62639	7.27775e-05	0.000486487	1.71374
ENSOARG00000015070	ZBTB41	zinc finger and BTB domain containing 41	Source:HGNC Symbol;Acc:HGNC:24819]	12	2.30155	5.89187	-5.6247	7.29892e-05	0.000487657	1.70253
ENSOARG00000012403	FAM207A	family with sequence similarity 207, member A	Source:HGNC Symbol;Acc:HGNC:15811]	1	4.14988	3.47956	-5.62398	7.30797e-05	0.000488017	1.84911
ENSOARG00000004861	STXBP6	syntaxin binding protein 6 (amisyn)	Source:HGNC Symbol;Acc:HGNC:19666]	18	-5.50821	-0.105143	5.62146	7.33983e-05	0.000489899	1.56488
ENSOARG00000006385	ZNRF1	zinc and ring finger 1, E3 ubiquitin protein ligase	Source:HGNC Symbol;Acc:HGNC:18452]	14	-3.23866	3.09053	5.62056	7.35124e-05	0.000490414	1.86473
ENSOARG00000005380	PDLIM7	PDZ and LIM domain 7 (enigma)	Source:HGNC Symbol;Acc:HGNC:22958]	5	1.90273	6.20956	-5.62019	7.35583e-05	0.000490475	1.68781
ENSOARG00000005974	MEF2D	myocyte enhancer factor 2D	Source:HGNC Symbol;Acc:HGNC:6997]	1	2.25081	6.48066	-5.61652	7.40254e-05	0.000493342	1.68108
ENSOARG00000009238	THOC1	THO complex 1	Source:HGNC Symbol;Acc:HGNC:19070]	23	1.73443	5.74994	-5.61528	7.4183e-05	0.000494145	1.68886
ENSOARG00000003493	CHTF8	CTF8, chromosome transmission fidelity factor 8 homolog (S. cerevisiae)	Source:HGNC Symbol;Acc:HGNC:24353]	14	2.56404	4.15026	-5.61442	7.42938e-05	0.000494549	1.78251
ENSOARG00000020358	PAK2	p21 protein (Cdc42/Rac)-activated kinase 2	Source:HGNC Symbol;Acc:HGNC:8591]	1	-1.7603	8.05762	5.61423	7.43179e-05	0.000494549	1.68626
ENSOARG00000021136	HIF1A	hypoxia inducible factor 1, alpha subunit (basic helix-loop-helix transcription factor)	Source:HGNC Symbol;Acc:HGNC:4910]	7	-4.04412	8.13569	5.61308	7.44653e-05	0.000495282	1.68421
ENSOARG00000013784	XPO4	exportin 4	Source:HGNC Symbol;Acc:HGNC:17796]	10	2.31399	5.85524	-5.61008	7.48509e-05	0.000497349	1.67783
ENSOARG00000016051				X	-2.78973	5.02036	5.61023	7.48312e-05	0.000497349	1.71614
ENSOARG00000008692	RPS4X	ribosomal protein S4, X-linked	Source:HGNC Symbol;Acc:HGNC:10424]	20	2.39581	6.02385	-5.60968	7.49031e-05	0.000497448	1.67329
ENSOARG00000019648	FAM212B	family with sequence similarity 212, member B	Source:HGNC Symbol;Acc:HGNC:28045]	1	6.0441	2.58331	-5.60922	7.49618e-05	0.00049748	1.86941
ENSOARG00000014545	IFT74	intraflagellar transport 74	Source:HGNC Symbol;Acc:HGNC:21424]	2	-3.53963	3.07584	5.60906	7.49826e-05	0.00049748	1.84621
ENSOARG00000018630	RER1	retention in endoplasmic reticulum sorting receptor 1	Source:HGNC Symbol;Acc:HGNC:30309]	12	1.72511	5.11704	-5.60505	7.55032e-05	0.000500435	1.70046
ENSOARG00000009509	ZDHHC2	zinc finger, DHHC-type containing 2	Source:HGNC Symbol;Acc:HGNC:18469]	26	-3.69676	1.61074	5.60519	7.54842e-05	0.000500435	1.8501
[truncated: 4,491 more rows]

## Sheet: T3vsT2
Ensembl Gene ID	external_gene_name	description	Source	chromosome_name	logFC	AveExpr	t	P.Value	adj.P.Val	B
ENSOARG00000002635	SAMD5	sterile alpha motif domain containing 5	Source:HGNC Symbol;Acc:HGNC:21180]	8	4.28861	2.86386	-10.1894	1.16116e-07	0.000254816	7.55793
ENSOARG00000000823	ERI3	ERI1 exoribonuclease family member 3	Source:HGNC Symbol;Acc:HGNC:17276]	1	3.71064	4.57624	-10.2519	1.07955e-07	0.000254816	8.03935
ENSOARG00000001668	TFEC	transcription factor EC	Source:HGNC Symbol;Acc:HGNC:11754]	4	3.24138	6.50483	-10.3042	1.016e-07	0.000254816	8.19453
ENSOARG00000007169	KLF4	Kruppel-like factor 4 (gut)	Source:HGNC Symbol;Acc:HGNC:6348]	2	-4.35514	3.58614	10.5699	7.49192e-08	0.000254816	8.18104
ENSOARG00000009506		Uncharacterized protein	Source:UniProtKB/TrEMBL;Acc:W5PID6]	2	-4.37962	7.72619	10.7739	5.95457e-08	0.000254816	8.69285
ENSOARG00000002238		Uncharacterized protein	Source:UniProtKB/TrEMBL;Acc:W5NW19]	AMGL01125088.1	-2.28282	9.58396	9.86343	1.70765e-07	0.000281058	7.70359
ENSOARG00000011328	VIM	vimentin	Source:HGNC Symbol;Acc:HGNC:12692]	13	-2.54594	7.77245	9.24093	3.66918e-07	0.000536801	6.98508
ENSOARG00000003862	PHLPP2	PH domain and leucine rich repeat protein phosphatase 2	Source:HGNC Symbol;Acc:HGNC:29149]	14	2.7738	4.13691	-9.10178	4.37646e-07	0.000547463	6.72791
ENSOARG00000001201	HS6ST1	heparan sulfate 6-O-sulfotransferase 1	Source:HGNC Symbol;Acc:HGNC:5201]	JH923582.1	-2.66269	8.12288	8.84117	6.12157e-07	0.000671689	6.49514
ENSOARG00000006433		Beta-defensin	Source:UniProtKB/TrEMBL;Acc:W5P8X7]	26	3.7737	3.19409	-8.71106	7.25786e-07	0.000695853	6.12058
ENSOARG00000012052	UBE2K	ubiquitin-conjugating enzyme E2K	Source:HGNC Symbol;Acc:HGNC:4914]	6	2.99105	4.46392	-8.69645	7.39875e-07	0.000695853	6.26827
ENSOARG00000000634	DNAL1	dynein, axonemal, light chain 1	Source:HGNC Symbol;Acc:HGNC:23247]	7	5.48909	2.92828	-8.39652	1.10383e-06	0.000761194	5.65968
ENSOARG00000007771	SEMA4D	sema domain, immunoglobulin domain (Ig), transmembrane domain (TM) and short cytoplasmic domain, (semaphorin) 4D	Source:HGNC Symbol;Acc:HGNC:10732]	2	3.36982	2.45738	-8.33573	1.19854e-06	0.000761194	5.5004
ENSOARG00000009346	GABRG3	gamma-aminobutyric acid (GABA) A receptor, gamma 3	Source:HGNC Symbol;Acc:HGNC:4088]	18	3.22359	5.95145	-8.19864	1.44527e-06	0.000761194	5.66614
ENSOARG00000000910	HM13	histocompatibility (minor) 13	Source:HGNC Symbol;Acc:HGNC:16435]	13	2.33807	5.60841	-8.38321	1.12386e-06	0.000761194	5.90643
ENSOARG00000010244	GRIN3B	glutamate receptor, ionotropic, N-methyl-D-aspartate 3B	Source:HGNC Symbol;Acc:HGNC:16768]	5	2.04817	5.85202	-8.21065	1.42163e-06	0.000761194	5.68205
ENSOARG00000003657	SURF2	surfeit 2	Source:HGNC Symbol;Acc:HGNC:11475]	3	-1.97501	9.97962	8.25409	1.33953e-06	0.000761194	5.74005
ENSOARG00000000889	C19orf45	chromosome 19 open reading frame 45	Source:HGNC Symbol;Acc:HGNC:24745]	5	-2.14727	5.58855	8.5295	9.23281e-07	0.000761194	6.09538
ENSOARG00000010328	DNASE2	deoxyribonuclease II, lysosomal	Source:HGNC Symbol;Acc:HGNC:2960]	5	-3.02455	4.67314	8.27925	1.29429e-06	0.000761194	5.75201
ENSOARG00000008719	NDE1	nudE neurodevelopment protein 1	Source:HGNC Symbol;Acc:HGNC:17619]	24	-3.1543	4.67954	8.42246	1.06586e-06	0.000761194	5.9375
ENSOARG00000006882	HOXB8	homeobox B8	Source:HGNC Symbol;Acc:HGNC:5119]	11	4.41235	3.43675	-8.02665	1.83352e-06	0.000858823	5.33256
ENSOARG00000000796	FAM161B	family with sequence similarity 161, member B	Source:HGNC Symbol;Acc:HGNC:19854]	7	3.16936	4.37759	-8.00797	1.8819e-06	0.000858823	5.38753
ENSOARG00000010513	FAM160B2	family with sequence similarity 160, member B2	Source:HGNC Symbol;Acc:HGNC:16492]	2	2.44452	5.6981	-8.08256	1.69639e-06	0.000858823	5.51056
ENSOARG00000007781	MEGF8	multiple EGF-like-domains 8	Source:HGNC Symbol;Acc:HGNC:3233]	14	-2.12172	6.32735	8.00431	1.89154e-06	0.000858823	5.40639
ENSOARG00000001530	AIG1	androgen-induced 1	Source:HGNC Symbol;Acc:HGNC:21607]	8	3.77171	5.86722	-7.77445	2.61561e-06	0.000883069	5.0918
ENSOARG00000004181		Uncharacterized protein	Source:UniProtKB/TrEMBL;Acc:W5P225]	14	3.63361	2.34134	-7.78723	2.56847e-06	0.000883069	4.82627
ENSOARG00000000903	ANKRD46	ankyrin repeat domain 46	Source:HGNC Symbol;Acc:HGNC:27229]	9	2.74776	4.57387	-7.81085	2.48369e-06	0.000883069	5.13213
ENSOARG00000001461	KIAA0141	KIAA0141	Source:HGNC Symbol;Acc:HGNC:28969]	5	2.20987	4.84615	-7.82328	2.44028e-06	0.000883069	5.15399
ENSOARG00000004901	EFCAB2	EF-hand calcium binding domain 2	Source:HGNC Symbol;Acc:HGNC:28166]	12	-2.20239	7.51731	7.83007	2.41689e-06	0.000883069	5.16788
ENSOARG00000006018	NPFFR1	neuropeptide FF receptor 1	Source:HGNC Symbol;Acc:HGNC:17425]	25	-2.2054	7.09253	7.79088	2.55518e-06	0.000883069	5.11359
ENSOARG00000007898	PRR19	proline rich 19	Source:HGNC Symbol;Acc:HGNC:33728]	14	-2.52513	7.22153	7.85774	2.32408e-06	0.000883069	5.20599
ENSOARG00000000429	MROH6	maestro heat-like repeat family member 6	Source:HGNC Symbol;Acc:HGNC:27814]	9	-5.82964	2.33677	7.86808	2.29036e-06	0.000883069	4.90156
ENSOARG00000001412		Uncharacterized protein	Source:UniProtKB/TrEMBL;Acc:W5NTI2]	4	1.86688	6.07385	-7.70506	2.88809e-06	0.0009275	4.99503
ENSOARG00000003096	FBXL18	F-box and leucine-rich repeat protein 18	Source:HGNC Symbol;Acc:HGNC:21874]	24	-2.51027	4.40208	7.71084	2.86429e-06	0.0009275	4.99355
ENSOARG00000005043	PACRGL	PARK2 co-regulated-like	Source:HGNC Symbol;Acc:HGNC:28442]	6	3.28319	5.77675	-7.6701	3.03662e-06	0.00094577	4.94693
ENSOARG00000000092	SHISA5	shisa family member 5	Source:HGNC Symbol;Acc:HGNC:30376]	19	-6.71721	1.14879	7.65829	3.08864e-06	0.00094577	4.05879
ENSOARG00000006816		Uncharacterized protein	Source:UniProtKB/TrEMBL;Acc:W5PA39]	6	2.69412	5.59579	-7.59672	3.37539e-06	0.0009975	4.84443
ENSOARG00000005331	HEPH	hephaestin	Source:HGNC Symbol;Acc:HGNC:4866]	X	2.48885	6.85709	-7.58985	3.40909e-06	0.0009975	4.83226
ENSOARG00000003812		Uncharacterized protein	Source:UniProtKB/TrEMBL;Acc:W5P0X0]	AMGL01121454.1	2.72602	6.54337	-7.56585	3.52963e-06	0.000999845	4.79866
ENSOARG00000001924	DUSP15	dual specificity phosphatase 15	Source:HGNC Symbol;Acc:HGNC:16236]	13	2.29388	4.92331	-7.55821	3.56898e-06	0.000999845	4.78983
ENSOARG00000000714	SNCG	synuclein, gamma (breast cancer-specific protein 1)	Source:HGNC Symbol;Acc:HGNC:11141]	25	4.89151	1.0193	-7.48915	3.9462e-06	0.0010329	3.86765
ENSOARG00000004053	PRAM1	PML-RARA regulated adaptor molecule 1	Source:HGNC Symbol;Acc:HGNC:30091]	5	2.23299	4.41313	-7.46645	4.07922e-06	0.0010329	4.65645
ENSOARG00000007472	CASP3	caspase 3, apoptosis-related cysteine peptidase	Source:HGNC Symbol;Acc:HGNC:1504]	26	2.18435	5.73491	-7.50266	3.86918e-06	0.0010329	4.71125
ENSOARG00000005551	OCLN	Uncharacterized protein	Source:UniProtKB/TrEMBL;Acc:W5P6A6]	16	2.03444	6.71616	-7.51663	3.79129e-06	0.0010329	4.72844
ENSOARG00000006104	MB21D1	Mab-21 domain containing 1	Source:HGNC Symbol;Acc:HGNC:21367]	8	-2.14426	7.80029	7.4739	4.03505e-06	0.0010329	4.66758
ENSOARG00000007767	LRP2BP	LRP2 binding protein	Source:HGNC Symbol;Acc:HGNC:25434]	26	3.59884	6.94157	-7.39796	4.51022e-06	0.00106047	4.55851
ENSOARG00000005785	MYO16	myosin XVI	Source:HGNC Symbol;Acc:HGNC:29822]	10	3.32998	4.60624	-7.41693	4.38623e-06	0.00106047	4.58899
ENSOARG00000009324	PROX1	prospero homeobox 1	Source:HGNC Symbol;Acc:HGNC:9459]	12	12.3888	-1.22081	-7.33343	4.96058e-06	0.00106751	1.19342
ENSOARG00000009715	TGM7	transglutaminase 7	Source:HGNC Symbol;Acc:HGNC:30790]	18	4.13481	2.28084	-7.32449	5.02662e-06	0.00106751	4.22872
ENSOARG00000002442	DIAPH2	diaphanous-related formin 2	Source:HGNC Symbol;Acc:HGNC:2877]	X	2.79253	3.78372	-7.36865	4.70916e-06	0.00106751	4.50039
ENSOARG00000003206	CHORDC1	cysteine and histidine-rich domain (CHORD) containing 1	Source:HGNC Symbol;Acc:HGNC:14525]	21	-1.64553	6.01004	7.33113	4.97743e-06	0.00106751	4.46377
ENSOARG00000011757		Olfactory receptor	Source:UniProtKB/TrEMBL;Acc:W5PQ71]	3	-2.1377	7.92508	7.33352	4.95986e-06	0.00106751	4.46567
ENSOARG00000004048	RNF152	ring finger protein 152	Source:HGNC Symbol;Acc:HGNC:26811]	23	-2.83884	4.47497	7.35418	4.8108e-06	0.00106751	4.49972
ENSOARG00000004462	PRR15L	proline rich 15-like	Source:HGNC Symbol;Acc:HGNC:28149]	11	-8.57038	1.77855	7.30972	5.13775e-06	0.00107379	3.89823
ENSOARG00000001468	MAPK8	mitogen-activated protein kinase 8	Source:HGNC Symbol;Acc:HGNC:6881]	25	2.75259	5.21396	-7.27229	5.43132e-06	0.00111741	4.38372
ENSOARG00000009686	ADAMTS4	ADAM metallopeptidase with thrombospondin type 1 motif, 4	Source:HGNC Symbol;Acc:HGNC:220]	1	3.91984	1.51858	-7.21934	5.87721e-06	0.00114208	3.85425
ENSOARG00000001295	LRRC48	leucine rich repeat containing 48	Source:HGNC Symbol;Acc:HGNC:25384]	11	2.33924	3.60241	-7.21696	5.89819e-06	0.00114208	4.28131
ENSOARG00000010021	SUPT4H1	suppressor of Ty 4 homolog 1 (S. cerevisiae)	Source:HGNC Symbol;Acc:HGNC:11467]	11	1.7807	5.46363	-7.22198	5.85409e-06	0.00114208	4.30891
ENSOARG00000008870	GPR179	G protein-coupled receptor 179	Source:HGNC Symbol;Acc:HGNC:31371]	11	2.34259	7.08734	-7.20342	6.01875e-06	0.00114853	4.27519
ENSOARG00000009193		Uncharacterized protein	Source:UniProtKB/TrEMBL;Acc:W5PHE4]	15	3.10816	3.19544	-7.17263	6.3028e-06	0.00116886	4.18782
ENSOARG00000002809	GMEB1	glucocorticoid modulatory element binding protein 1	Source:HGNC Symbol;Acc:HGNC:4370]	2	2.50534	4.82656	-7.17404	6.28951e-06	0.00116886	4.24295
ENSOARG00000004518		Uncharacterized protein	Source:UniProtKB/TrEMBL;Acc:W5P334]	14	3.32162	5.61942	-7.15389	6.48259e-06	0.0011855	4.2089
ENSOARG00000009054	FGL1	fibrinogen-like 1	Source:HGNC Symbol;Acc:HGNC:3695]	26	2.45542	4.21033	-7.11623	6.86051e-06	0.00121977	4.15689
ENSOARG00000005124	TRPA1	transient receptor potential cation channel, subfamily A, member 1	Source:HGNC Symbol;Acc:HGNC:497]	9	-2.28613	6.17473	7.10784	6.94788e-06	0.00121977	4.13614
ENSOARG00000000538	TLR1	Ovis aries toll-like receptor 1 (TLR1), mRNA.	Source:RefSeq mRNA;Acc:NM_001135060]	6	2.33837	4.04838	-7.09543	7.07913e-06	0.00122646	4.12445
ENSOARG00000008011	GALNT13	polypeptide N-acetylgalactosaminyltransferase 13	Source:HGNC Symbol;Acc:HGNC:23242]	2	1.68735	9.76834	-7.02439	7.88325e-06	0.00134804	4.01325
ENSOARG00000000623	S100A5	S100 calcium binding protein A5	Source:HGNC Symbol;Acc:HGNC:10495]	1	5.5718	2.65835	-6.98803	8.33153e-06	0.00135434	3.84231
ENSOARG00000001463				13	2.2943	4.56942	-7.01152	8.03896e-06	0.00135434	4.00644
ENSOARG00000010881	ANKRD2	ankyrin repeat domain 2 (stretch responsive muscle)	Source:HGNC Symbol;Acc:HGNC:495]	22	-1.94262	8.6575	6.99	8.30659e-06	0.00135434	3.96071
ENSOARG00000005146	COX20	COX20 cytochrome c oxidase assembly factor	Source:HGNC Symbol;Acc:HGNC:26970]	12	-2.64633	4.72187	6.98945	8.31355e-06	0.00135434	3.97338
ENSOARG00000012845	B4GALT5	UDP-Gal:betaGlcNAc beta 1,4- galactosyltransferase, polypeptide 5	Source:HGNC Symbol;Acc:HGNC:928]	13	3.86839	4.49698	-6.95292	8.79014e-06	0.00136455	3.92051
ENSOARG00000011073	C6orf203	chromosome 6 open reading frame 203	Source:HGNC Symbol;Acc:HGNC:17971]	8	2.27387	6.06066	-6.95565	8.75362e-06	0.00136455	3.91042
ENSOARG00000001464	CXorf38	chromosome X open reading frame 38	Source:HGNC Symbol;Acc:HGNC:28589]	X	2.01036	8.26101	-6.94388	8.91256e-06	0.00136455	3.89067
ENSOARG00000004552	GPSM1	G-protein signaling modulator 1	Source:HGNC Symbol;Acc:HGNC:17858]	3	-1.55512	6.93759	6.96681	8.60562e-06	0.00136455	3.9234
ENSOARG00000009450	ANGPTL3	angiopoietin-like 3	Source:HGNC Symbol;Acc:HGNC:491]	1	-2.13165	4.97314	6.94816	8.85444e-06	0.00136455	3.9101
ENSOARG00000001515	TMEM150B	transmembrane protein 150B	Source:HGNC Symbol;Acc:HGNC:34415]	14	2.45698	6.42567	-6.93336	9.05722e-06	0.00137076	3.87464
ENSOARG00000007927		Uncharacterized protein	Source:UniProtKB/TrEMBL;Acc:W5PDJ8]	2	3.25355	4.28936	-6.9232	9.19921e-06	0.00137643	3.87641
ENSOARG00000006658	WNK3	WNK lysine deficient protein kinase 3	Source:HGNC Symbol;Acc:HGNC:14543]	X	-4.81832	1.18645	6.90831	9.41163e-06	0.00139239	3.34473
ENSOARG00000005257	GZF1	GDNF-inducible zinc finger protein 1	Source:HGNC Symbol;Acc:HGNC:15808]	13	3.08373	2.86483	-6.8788	9.84816e-06	0.00142934	3.74437
ENSOARG00000003047	DKC1	Ovis aries dyskeratosis congenita 1, dyskerin (DKC1), mRNA.	Source:RefSeq mRNA;Acc:NM_001142513]	X	-2.11422	4.27824	6.8768	9.87849e-06	0.00142934	3.8082
ENSOARG00000012556	UMOD	uromodulin	Source:HGNC Symbol;Acc:HGNC:12559]	24	3.40986	5.26607	-6.86448	1.00676e-05	0.00144087	3.78305
ENSOARG00000001517		Uncharacterized protein	Source:UniProtKB/TrEMBL;Acc:W5NTT3]	17	2.07763	6.06947	-6.8563	1.01953e-05	0.00144346	3.76036
ENSOARG00000003624	DOCK9	dedicator of cytokinesis 9	Source:HGNC Symbol;Acc:HGNC:14132]	10	6.23004	-0.0804957	-6.81757	1.08236e-05	0.0014685	2.35244
ENSOARG00000011318	PPP1CA	protein phosphatase 1, catalytic subunit, alpha isozyme	Source:HGNC Symbol;Acc:HGNC:9281]	21	3.23229	2.83485	-6.83197	1.05853e-05	0.0014685	3.67664
ENSOARG00000002280	STIP1	stress-induced phosphoprotein 1	Source:HGNC Symbol;Acc:HGNC:11387]	4	-1.86024	5.87845	6.80469	1.10414e-05	0.0014685	3.6831
ENSOARG00000010050	GALNT18	polypeptide N-acetylgalactosaminyltransferase 18	Source:HGNC Symbol;Acc:HGNC:30488]	15	-2.21845	6.60686	6.80874	1.09724e-05	0.0014685	3.68475
ENSOARG00000008688	C17orf104	chromosome 17 open reading frame 104	Source:HGNC Symbol;Acc:HGNC:26670]	11	-3.11389	4.80842	6.82875	1.06381e-05	0.0014685	3.7339
ENSOARG00000011905	HYLS1	hydrolethalus syndrome 1	Source:HGNC Symbol;Acc:HGNC:26558]	21	-3.68718	4.26764	6.80479	1.10396e-05	0.0014685	3.70137
ENSOARG00000002722		Uncharacterized protein	Source:UniProtKB/TrEMBL;Acc:W5NXJ3]	JH922753.1	2.57406	4.02526	-6.77514	1.1559e-05	0.00148503	3.65656
ENSOARG00000000828		Uncharacterized protein	Source:UniProtKB/TrEMBL;Acc:W5NRR1]	JH923172.1	-2.01263	3.85155	6.76729	1.17006e-05	0.00148503	3.64375
ENSOARG00000003800	C19orf18	chromosome 19 open reading frame 18	Source:HGNC Symbol;Acc:HGNC:28642]	14	-2.2523	5.81024	6.77661	1.15325e-05	0.00148503	3.64134
ENSOARG00000006469		Uncharacterized protein	Source:UniProtKB/TrEMBL;Acc:W5P915]	13	5.71427	-0.679909	-6.75217	1.19789e-05	0.00150215	1.90796
ENSOARG00000010940		Uncharacterized protein	Source:UniProtKB/TrEMBL;Acc:W5PMQ7]	16	-4.40944	0.824458	6.74524	1.21088e-05	0.00150412	2.98578
ENSOARG00000008958	TRIM72	tripartite motif containing 72, E3 ubiquitin protein ligase	Source:HGNC Symbol;Acc:HGNC:32671]	24	-2.4761	3.33074	6.7194	1.26062e-05	0.00155127	3.55812
ENSOARG00000008532	MCM9	minichromosome maintenance complex component 9	Source:HGNC Symbol;Acc:HGNC:21484]	8	1.98485	5.50172	-6.70959	1.28006e-05	0.00156061	3.54315
ENSOARG00000006256	RSRP1	arginine/serine-rich protein 1	Source:HGNC Symbol;Acc:HGNC:25234]	2	-2.1633	6.63897	6.6983	1.30283e-05	0.00156865	3.51515
ENSOARG00000008457		Uncharacterized protein	Source:UniProtKB/TrEMBL;Acc:W5PF57]	11	-2.24311	4.40416	6.69455	1.31049e-05	0.00156865	3.53523
ENSOARG00000004904		Uncharacterized protein	Source:UniProtKB/TrEMBL;Acc:W5P498]	13	-1.92184	7.46414	6.67491	1.35136e-05	0.00160301	3.47864
ENSOARG00000003769	TRIM46	tripartite motif containing 46	Source:HGNC Symbol;Acc:HGNC:19019]	1	1.66801	7.42481	-6.6619	1.37919e-05	0.00160706	3.45873
ENSOARG00000006803		Uncharacterized protein	Source:UniProtKB/TrEMBL;Acc:W5PA29]	19	-2.58231	3.49504	6.66556	1.3713e-05	0.00160706	3.48532
ENSOARG00000009441	TBCK	TBC1 domain containing kinase	Source:HGNC Symbol;Acc:HGNC:28261]	6	2.1269	5.76981	-6.62743	1.45587e-05	0.00162193	3.41297
ENSOARG00000000541		Uncharacterized protein	Source:UniProtKB/TrEMBL;Acc:W5NQV7]	19	-1.71061	7.99052	6.63442	1.43996e-05	0.00162193	3.41714
ENSOARG00000001250	FAM166A	family with sequence similarity 166, member A	Source:HGNC Symbol;Acc:HGNC:33818]	3	-2.15848	5.61289	6.65021	1.4047e-05	0.00162193	3.44991
ENSOARG00000007503	POLR1C	polymerase (RNA) I polypeptide C, 30kDa	Source:HGNC Symbol;Acc:HGNC:20194]	20	-2.31458	5.78913	6.63492	1.43883e-05	0.00162193	3.42387
ENSOARG00000000107	HOXD13	homeobox D13	Source:HGNC Symbol;Acc:HGNC:5136]	2	-2.55652	6.15848	6.61249	1.4905e-05	0.00162193	3.38505
ENSOARG00000009400	PLIN4	perilipin 4	Source:HGNC Symbol;Acc:HGNC:29393]	5	-2.91053	5.60357	6.63221	1.44498e-05	0.00162193	3.42317
ENSOARG00000011715	FKBP8	FK506 binding protein 8, 38kDa	Source:HGNC Symbol;Acc:HGNC:3724]	5	1.47041	6.24759	-6.59094	1.54195e-05	0.00165064	3.35071
ENSOARG00000009670	CPXM2	carboxypeptidase X (M14 family), member 2	Source:HGNC Symbol;Acc:HGNC:26977]	22	4.60396	2.14157	-6.517	1.73329e-05	0.001672	3.12153
ENSOARG00000007664	PIK3CD	phosphatidylinositol-4,5-bisphosphate 3-kinase, catalytic subunit delta	Source:HGNC Symbol;Acc:HGNC:8977]	12	3.72065	3.35544	-6.54499	1.65809e-05	0.001672	3.29882
ENSOARG00000005473	GSN	gelsolin	Source:RefSeq peptide;Acc:NP_001232935]	2	3.65066	3.40081	-6.5203	1.72424e-05	0.001672	3.26408
ENSOARG00000009468		Uncharacterized protein	Source:UniProtKB/TrEMBL;Acc:W5PI99]	5	2.88369	7.20111	-6.55162	1.64077e-05	0.001672	3.28707
ENSOARG00000005789	MED13L	mediator complex subunit 13-like	Source:HGNC Symbol;Acc:HGNC:22962]	17	2.33233	5.23854	-6.53302	1.68981e-05	0.001672	3.27555
ENSOARG00000011167	CMTR2	cap methyltransferase 2	Source:HGNC Symbol;Acc:HGNC:25635]	14	1.90606	4.53127	-6.54325	1.66266e-05	0.001672	3.30338
ENSOARG00000000438	GRID1	glutamate receptor, ionotropic, delta 1	Source:HGNC Symbol;Acc:HGNC:4575]	25	-1.85756	5.9673	6.55186	1.64016e-05	0.001672	3.29233
ENSOARG00000012912	MAML3	mastermind-like 3 (Drosophila)	Source:HGNC Symbol;Acc:HGNC:16272]	17	-1.89609	6.58549	6.54362	1.66168e-05	0.001672	3.27493
ENSOARG00000002662	NYX	nyctalopin	Source:HGNC Symbol;Acc:HGNC:8082]	X	-2.0627	3.96751	6.5235	1.71551e-05	0.001672	3.27843
ENSOARG00000007589	DBR1	debranching RNA lariats 1	Source:HGNC Symbol;Acc:HGNC:15594]	1	-2.12378	4.66051	6.51469	1.73968e-05	0.001672	3.25696
ENSOARG00000006255		Uncharacterized protein	Source:UniProtKB/TrEMBL;Acc:W5P8E2]	2	-2.40338	3.48605	6.53631	1.68103e-05	0.001672	3.29385
ENSOARG00000004661	FAM19A2	family with sequence similarity 19 (chemokine (C-C motif)-like), member A2	Source:HGNC Symbol;Acc:HGNC:21589]	3	-3.25417	2.5093	6.52452	1.71274e-05	0.001672	3.21074
ENSOARG00000006340	GAB4	GRB2-associated binding protein family, member 4	Source:HGNC Symbol;Acc:HGNC:18325]	21	-1.83358	6.41448	6.51005	1.75252e-05	0.00167213	3.22299
ENSOARG00000007122	NDUFS3	NADH dehydrogenase (ubiquinone) Fe-S protein 3, 30kDa (NADH-coenzyme Q reductase)	Source:HGNC Symbol;Acc:HGNC:7710]	15	2.76864	3.16329	-6.50046	1.77945e-05	0.00167357	3.22611
ENSOARG00000010787	ACSS2	acyl-CoA synthetase short-chain family member 2	Source:HGNC Symbol;Acc:HGNC:15814]	13	2.02592	5.28023	-6.50167	1.77601e-05	0.00167357	3.22576
ENSOARG00000004436	DLX6	distal-less homeobox 6	Source:HGNC Symbol;Acc:HGNC:2919]	4	3.46348	5.41233	-6.48617	1.82033e-05	0.00167435	3.20036
ENSOARG00000000653	PSD	pleckstrin and Sec7 domain containing	Source:HGNC Symbol;Acc:HGNC:9507]	22	2.76937	5.13574	-6.48506	1.82355e-05	0.00167435	3.20308
ENSOARG00000006454	DPP4	Uncharacterized protein	Source:UniProtKB/TrEMBL;Acc:W5P906]	2	2.3995	4.60706	-6.48245	1.83114e-05	0.00167435	3.20884
ENSOARG00000006227	TIMM50	translocase of inner mitochondrial membrane 50 homolog (S. cerevisiae)	Source:HGNC Symbol;Acc:HGNC:23656]	14	2.29321	4.19037	-6.48975	1.81e-05	0.00167435	3.22567
ENSOARG00000003627	SMIM23	small integral membrane protein 23	Source:HGNC Symbol;Acc:HGNC:34440]	16	2.76056	6.0052	-6.47088	1.86521e-05	0.00167874	3.1668
ENSOARG00000004490	STRIP2	striatin interacting protein 2	Source:HGNC Symbol;Acc:HGNC:22209]	4	-1.98073	5.11449	6.46821	1.87314e-05	0.00167874	3.17656
ENSOARG00000011472	HNRNPDL	heterogeneous nuclear ribonucleoprotein D-like	Source:HGNC Symbol;Acc:HGNC:5037]	1	-2.02237	4.8	6.46786	1.87419e-05	0.00167874	3.1822
ENSOARG00000001420		Uncharacterized protein	Source:UniProtKB/TrEMBL;Acc:W5NTI7]	JH921997.1	2.86816	2.48433	-6.46029	1.89694e-05	0.00168466	3.11111
ENSOARG00000008229	IFITM5	interferon induced transmembrane protein 5	Source:HGNC Symbol;Acc:HGNC:16644]	21	-2.25723	4.15036	6.45718	1.90639e-05	0.00168466	3.17574
ENSOARG00000001768		Uncharacterized protein	Source:UniProtKB/TrEMBL;Acc:W5NUL1]	JH923498.1	2.87016	3.2609	-6.42852	1.99567e-05	0.0017518	3.12306
ENSOARG00000004036	ETFDH	electron-transferring-flavoprotein dehydrogenase	Source:HGNC Symbol;Acc:HGNC:3483]	17	3.2759	3.50557	-6.41709	2.03251e-05	0.00176415	3.11269
ENSOARG00000003683		Uncharacterized protein	Source:UniProtKB/TrEMBL;Acc:W5P0I2]	5	2.29664	3.42174	-6.39565	2.10352e-05	0.00176415	3.0798
ENSOARG00000010607	CCDC8	coiled-coil domain containing 8	Source:HGNC Symbol;Acc:HGNC:25367]	14	2.14675	6.38126	-6.39652	2.10061e-05	0.00176415	3.0446
ENSOARG00000003648	CCNL2	cyclin L2	Source:HGNC Symbol;Acc:HGNC:20570]	12	2.01273	3.81882	-6.41104	2.05228e-05	0.00176415	3.10702
ENSOARG00000009918	DOCK5	dedicator of cytokinesis 5	Source:HGNC Symbol;Acc:HGNC:23476]	2	1.58383	5.50199	-6.39699	2.09902e-05	0.00176415	3.05666
ENSOARG00000006554	TNP2	transition protein 2 (during histone to protamine replacement)	Source:HGNC Symbol;Acc:HGNC:11952]	24	2.62885	2.9494	-6.37739	2.16609e-05	0.00179304	3.03233
ENSOARG00000008997	PYGM	Ovis aries phosphorylase, glycogen, muscle (PYGM), mRNA.	Source:RefSeq mRNA;Acc:NM_001009192]	21	-1.68127	5.60401	6.37374	2.17883e-05	0.00179304	3.01754
ENSOARG00000011987	SIRT4	Ovis aries sirtuin 4 (SIRT4), mRNA.	Source:RefSeq mRNA;Acc:NM_001163044]	17	-1.74792	7.48217	6.38133	2.15242e-05	0.00179304	3.01835
ENSOARG00000004871	COL1A1	collagen, type I, alpha 1	Source:HGNC Symbol;Acc:HGNC:2197]	11	3.3317	1.64832	-6.35701	2.23825e-05	0.0018305	2.80395
ENSOARG00000003733	TMEM154	Uncharacterized protein	Source:UniProtKB/TrEMBL;Acc:W5P0N4]	17	4.58622	0.777848	-6.33502	2.3189e-05	0.00186761	2.42986
ENSOARG00000007208	TJAP1	tight junction associated protein 1 (peripheral)	Source:HGNC Symbol;Acc:HGNC:17949]	20	2.18267	5.13841	-6.33683	2.31215e-05	0.00186761	2.96993
ENSOARG00000005857	NBEAL2	neurobeachin-like 2	Source:HGNC Symbol;Acc:HGNC:31928]	19	-1.79585	7.49684	6.33308	2.32618e-05	0.00186761	2.94155
ENSOARG00000003711	SURF6	surfeit 6	Source:HGNC Symbol;Acc:HGNC:11478]	3	2.4657	3.19473	-6.32527	2.35566e-05	0.00186849	2.9663
ENSOARG00000006483		Uncharacterized protein	Source:UniProtKB/TrEMBL;Acc:W5P933]	26	2.41199	4.31973	-6.32012	2.37534e-05	0.00187282	2.96149
ENSOARG00000007928	RFFL	ring finger and FYVE-like domain containing E3 ubiquitin protein ligase	Source:HGNC Symbol;Acc:HGNC:24821]	11	4.40763	4.54542	-6.3017	2.44705e-05	0.00189504	2.93028
ENSOARG00000009483	ASIP	agouti-signaling protein precursor	Source:RefSeq peptide;Acc:NP_001127775]	13	3.37799	2.90433	-6.29816	2.46109e-05	0.00189504	2.90852
ENSOARG00000004844	MSC	musculin	Source:HGNC Symbol;Acc:HGNC:7321]	9	2.2301	3.80907	-6.29877	2.45867e-05	0.00189504	2.93423
ENSOARG00000004569		Uncharacterized protein	Source:UniProtKB/TrEMBL;Acc:W5P388]	X	-2.43167	5.47803	6.3024	2.44428e-05	0.00189504	2.9073
ENSOARG00000003997	HYDIN	HYDIN, axonemal central pair apparatus protein	Source:HGNC Symbol;Acc:HGNC:19368]	14	-2.19681	5.17489	6.28856	2.49961e-05	0.001911	2.8919
ENSOARG00000011465	POLR1E	polymerase (RNA) I polypeptide E, 53kDa	Source:HGNC Symbol;Acc:HGNC:17631]	2	-3.96139	4.93106	6.28579	2.51084e-05	0.001911	2.89506
ENSOARG00000005279	UBQLN4	ubiquilin 4	Source:HGNC Symbol;Acc:HGNC:1237]	1	1.97052	3.92354	-6.25551	2.63714e-05	0.00198419	2.86586
ENSOARG00000003337	NTPCR	nucleoside-triphosphatase, cancer-related	Source:HGNC Symbol;Acc:HGNC:28204]	25	-2.40943	5.20098	6.23982	2.7052e-05	0.00202061	2.8143
ENSOARG00000001322	FBXO22	F-box protein 22	Source:HGNC Symbol;Acc:HGNC:13593]	18	-1.95305	6.6877	6.23077	2.74534e-05	0.00203078	2.77763
ENSOARG00000011359	MAP7D3	MAP7 domain containing 3	Source:HGNC Symbol;Acc:HGNC:25742]	X	4.45369	6.6201	-6.21688	2.80807e-05	0.0020614	2.75923
ENSOARG00000001531	SCAPER	S-phase cyclin A-associated protein in the ER	Source:HGNC Symbol;Acc:HGNC:13081]	18	5.41915	0.0101789	-6.18625	2.95186e-05	0.00206576	1.84069
ENSOARG00000005831	ZNF451	zinc finger protein 451	Source:HGNC Symbol;Acc:HGNC:21091]	20	3.86437	3.31208	-6.17499	3.00665e-05	0.00206576	2.73712
ENSOARG00000004137	OR3A2	olfactory receptor, family 3, subfamily A, member 2	Source:HGNC Symbol;Acc:HGNC:8283]	11	3.58014	3.58066	-6.16591	3.05163e-05	0.00206576	2.72828
ENSOARG00000003575	CYB5B	cytochrome b5 type B (outer mitochondrial membrane)	Source:HGNC Symbol;Acc:HGNC:24374]	14	2.96982	6.25488	-6.19523	2.90894e-05	0.00206576	2.72456
ENSOARG00000010148	BEX5	brain expressed, X-linked 5	Source:HGNC Symbol;Acc:HGNC:27990]	X	2.59092	4.05094	-6.1855	2.95548e-05	0.00206576	2.75472
ENSOARG00000007126	ING4	inhibitor of growth family, member 4	Source:HGNC Symbol;Acc:HGNC:19423]	3	2.11982	2.8278	-6.16748	3.04378e-05	0.00206576	2.71274
ENSOARG00000011947	AFAP1	actin filament associated protein 1	Source:HGNC Symbol;Acc:HGNC:24017]	6	2.03002	4.02287	-6.16627	3.04984e-05	0.00206576	2.72446
ENSOARG00000006335		Uncharacterized protein	Source:UniProtKB/TrEMBL;Acc:W5P8N2]	13	1.85579	4.21948	-6.18488	2.95848e-05	0.00206576	2.75014
ENSOARG00000007571	DNTT	DNA nucleotidylexotransferase	Source:HGNC Symbol;Acc:HGNC:2983]	22	1.51465	5.22563	-6.18808	2.94308e-05	0.00206576	2.72996
ENSOARG00000004095	ZNF414	zinc finger protein 414	Source:HGNC Symbol;Acc:HGNC:20630]	5	-1.62401	8.38115	6.16436	3.05934e-05	0.00206576	2.67305
ENSOARG00000006032	PHB	prohibitin	Source:HGNC Symbol;Acc:HGNC:8912]	11	-1.63261	6.74427	6.19328	2.91822e-05	0.00206576	2.71692
ENSOARG00000012546	CRISP1	cysteine-rich secretory protein 1	Source:HGNC Symbol;Acc:HGNC:304]	20	-1.88101	6.21834	6.17474	3.00789e-05	0.00206576	2.69041
ENSOARG00000004106		Uncharacterized protein	Source:UniProtKB/TrEMBL;Acc:W5P1V3]	8	-2.24354	6.39923	6.18058	2.97933e-05	0.00206576	2.6983
ENSOARG00000012897	CABP1	calcium binding protein 1	Source:HGNC Symbol;Acc:HGNC:1384]	17	-4.09212	0.640093	6.18545	2.95573e-05	0.00206576	2.21921
ENSOARG00000009106	ACPP	acid phosphatase, prostate	Source:HGNC Symbol;Acc:HGNC:125]	1	-2.24046	4.48734	6.141	3.17863e-05	0.00212452	2.67371
ENSOARG00000004896	SYTL2	synaptotagmin-like 2	Source:HGNC Symbol;Acc:HGNC:15585]	21	-1.66773	4.91765	6.13456	3.21237e-05	0.00213622	2.65162
ENSOARG00000011540	UBA52	Ovis aries ubiqitin RPL40 fusion protein (OVUBQ-L40), mRNA.	Source:RefSeq mRNA;Acc:NM_001009286]	5	3.92394	1.38864	-6.12989	3.23709e-05	0.00214185	2.41319
ENSOARG00000006326		Uncharacterized protein	Source:UniProtKB/TrEMBL;Acc:W5P8M1]	26	-2.35049	5.04087	6.12638	3.25575e-05	0.00214342	2.63543
ENSOARG00000008528	ZNF140	zinc finger protein 140	Source:HGNC Symbol;Acc:HGNC:12925]	17	2.24043	4.59209	-6.10878	3.35123e-05	0.00216302	2.62032
ENSOARG00000004977	RUVBL1	RuvB-like AAA ATPase 1	Source:HGNC Symbol;Acc:HGNC:10474]	19	1.58565	5.46611	-6.11185	3.33435e-05	0.00216302	2.60155
ENSOARG00000002993	ULK4	unc-51 like kinase 4	Source:HGNC Symbol;Acc:HGNC:15784]	19	-3.53948	0.932472	6.10919	3.34896e-05	0.00216302	2.27079
ENSOARG00000005026	RUFY2	RUN and FYVE domain containing 2	Source:HGNC Symbol;Acc:HGNC:19761]	25	-1.58108	5.4869	6.10563	3.3686e-05	0.00216363	2.58989
ENSOARG00000003077	AP3M2	adaptor-related protein complex 3, mu 2 subunit	Source:HGNC Symbol;Acc:HGNC:570]	26	-1.61957	5.58365	6.07772	3.52694e-05	0.00225433	2.54226
ENSOARG00000004973	LAS1L	LAS1-like (S. cerevisiae)	Source:HGNC Symbol;Acc:HGNC:25726]	X	4.45567	3.76627	-6.06324	3.61218e-05	0.00226484	2.56716
ENSOARG00000005044	PROSER3	proline and serine rich 3	Source:HGNC Symbol;Acc:HGNC:25204]	14	2.94661	4.5044	-6.06511	3.60104e-05	0.00226484	2.55306
ENSOARG00000011102	INTS7	integrator complex subunit 7	Source:HGNC Symbol;Acc:HGNC:24484]	12	-1.51632	6.1552	6.06588	3.59644e-05	0.00226484	2.51331
ENSOARG00000002537	RSRC1	arginine/serine-rich coiled-coil 1	Source:HGNC Symbol;Acc:HGNC:24152]	1	-1.91537	6.01151	6.06825	3.58246e-05	0.00226484	2.51935
ENSOARG00000001532	TMEM165	transmembrane protein 165	Source:HGNC Symbol;Acc:HGNC:30760]	6	1.91559	4.74473	-6.04921	3.69679e-05	0.0023069	2.51974
ENSOARG00000012432		Uncharacterized protein	Source:UniProtKB/TrEMBL;Acc:W5PS96]	X	-1.50475	8.29897	6.04281	3.73606e-05	0.00230952	2.47467
ENSOARG00000001750	PEAK1	pseudopodium-enriched atypical kinase 1	Source:HGNC Symbol;Acc:HGNC:29431]	18	-2.84566	4.40799	6.04539	3.7202e-05	0.00230952	2.5231
ENSOARG00000007665	USP24	ubiquitin specific peptidase 24	Source:HGNC Symbol;Acc:HGNC:12623]	1	1.74524	4.7158	-6.03292	3.79769e-05	0.00233664	2.4944
ENSOARG00000008136	SUSD3	sushi domain containing 3	Source:HGNC Symbol;Acc:HGNC:28391]	2	-1.95495	4.52902	6.02651	3.83811e-05	0.00235053	2.4885
ENSOARG00000006982	AQP4A	Ovis aries aquaporin 4 (AQP4), mRNA.	Source:RefSeq mRNA;Acc:NM_001009279]	23	3.68281	1.077	-6.018	3.89262e-05	0.00237288	2.18249
ENSOARG00000002864		Uncharacterized protein	Source:UniProtKB/TrEMBL;Acc:W5NXV5]	JH921599.1	2.8442	3.67808	-6.0088	3.95237e-05	0.00238428	2.48089
ENSOARG00000011244	RDH5	retinol dehydrogenase 5 (11-cis/9-cis)	Source:HGNC Symbol;Acc:HGNC:9940]	3	2.83527	2.869	-6.00893	3.95152e-05	0.00238428	2.47094
ENSOARG00000004252	ILVBL	ilvB (bacterial acetolactate synthase)-like	Source:HGNC Symbol;Acc:HGNC:6041]	5	-1.98262	6.248	6.00678	3.96565e-05	0.00238428	2.41596
ENSOARG00000010474	HR	hair growth associated	Source:HGNC Symbol;Acc:HGNC:5172]	2	-1.74948	4.75339	6.00152	4.00038e-05	0.00239423	2.44132
ENSOARG00000005821	PMAIP1	phorbol-12-myristate-13-acetate-induced protein 1	Source:HGNC Symbol;Acc:HGNC:9108]	23	3.88655	2.1739	-5.99573	4.03897e-05	0.00240639	2.38884
ENSOARG00000003237	PSKH1	protein serine kinase H1	Source:HGNC Symbol;Acc:HGNC:9529]	14	5.6857	2.15467	-5.97916	4.15163e-05	0.00245069	2.34191
ENSOARG00000008060	ZNF185	zinc finger protein 185 (LIM domain)	Source:HGNC Symbol;Acc:HGNC:12976]	X	2.54336	3.43806	-5.97622	4.1719e-05	0.00245069	2.43089
ENSOARG00000009005	C2CD3	C2 calcium-dependent domain containing 3	Source:HGNC Symbol;Acc:HGNC:24564]	15	1.8694	4.27062	-5.97893	4.15316e-05	0.00245069	2.41947
ENSOARG00000004550	CCDC105	coiled-coil domain containing 105	Source:HGNC Symbol;Acc:HGNC:26866]	5	-1.74761	5.5852	5.97394	4.18779e-05	0.00245069	2.37255
ENSOARG00000006643	RASA2	RAS p21 protein activator 2	Source:HGNC Symbol;Acc:HGNC:9872]	1	1.99415	5.93042	-5.96878	4.22388e-05	0.00245619	2.35811
ENSOARG00000002720	VAV2	vav 2 guanine nucleotide exchange factor	Source:HGNC Symbol;Acc:HGNC:12658]	3	-3.057	1.77366	5.96727	4.23449e-05	0.00245619	2.30152
ENSOARG00000000421	BEX4	brain expressed, X-linked 4	Source:HGNC Symbol;Acc:HGNC:25475]	X	2.29356	3.40502	-5.95815	4.29922e-05	0.00246121	2.40237
ENSOARG00000007024	ARSI	arylsulfatase family, member I	Source:HGNC Symbol;Acc:HGNC:32521]	5	-1.42328	4.87578	5.95992	4.28658e-05	0.00246121	2.36955
ENSOARG00000007538	MRPL50	mitochondrial ribosomal protein L50	Source:HGNC Symbol;Acc:HGNC:16654]	2	-2.23254	8.82884	5.95871	4.2952e-05	0.00246121	2.33797
ENSOARG00000001875	CARD14	caspase recruitment domain family, member 14	Source:HGNC Symbol;Acc:HGNC:16446]	11	2.77266	3.64511	-5.9486	4.36807e-05	0.00247907	2.38572
ENSOARG00000004399	UBC	ubiquitin C	Source:HGNC Symbol;Acc:HGNC:12468]	11	-2.13016	5.32622	5.95064	4.35331e-05	0.00247907	2.34143
ENSOARG00000004590	DAP3	death associated protein 3	Source:HGNC Symbol;Acc:HGNC:2673]	1	-1.88877	7.06059	5.94487	4.39532e-05	0.00248383	2.30991
ENSOARG00000001808		Uncharacterized protein	Source:UniProtKB/TrEMBL;Acc:W5NUR5]	10	-1.93913	8.88647	5.92538	4.54053e-05	0.00255492	2.28318
ENSOARG00000005515	PDPR	pyruvate dehydrogenase phosphatase regulatory subunit	Source:HGNC Symbol;Acc:HGNC:30264]	14	3.38022	3.20092	-5.91885	4.5903e-05	0.00257193	2.33909
ENSOARG00000002855	PRR36	proline rich 36	Source:HGNC Symbol;Acc:HGNC:26172]	5	4.67009	1.38903	-5.91561	4.61521e-05	0.00257493	2.09566
ENSOARG00000012326	BOLA3	bolA family member 3	Source:HGNC Symbol;Acc:HGNC:24415]	3	-2.13661	6.42172	5.90366	4.70824e-05	0.00260476	2.24449
ENSOARG00000002242	LURAP1	leucine rich adaptor protein 1	Source:HGNC Symbol;Acc:HGNC:32327]	1	2.56333	2.80191	-5.89482	4.77838e-05	0.00262708	2.29271
ENSOARG00000006604	FKBP9	FK506 binding protein 9, 63 kDa	Source:HGNC Symbol;Acc:HGNC:3725]	4	2.19033	4.34372	-5.89356	4.78848e-05	0.00262708	2.27979
ENSOARG00000009182	TAX1BP1	Tax1 (human T-cell leukemia virus type I) binding protein 1	Source:HGNC Symbol;Acc:HGNC:11575]	4	3.76992	2.89868	-5.88486	4.8587e-05	0.00265455	2.27695
ENSOARG00000005958	SRBD1	S1 RNA binding domain 1	Source:HGNC Symbol;Acc:HGNC:25521]	3	2.39624	2.62391	-5.87691	4.92389e-05	0.00267904	2.25724
ENSOARG00000007487	AGBL2	ATP/GTP binding protein-like 2	Source:HGNC Symbol;Acc:HGNC:26296]	15	2.11365	3.94545	-5.87363	4.95096e-05	0.00268269	2.25862
ENSOARG00000005660	PCTP	phosphatidylcholine transfer protein	Source:HGNC Symbol;Acc:HGNC:8752]	11	2.6901	4.06779	-5.86857	4.99316e-05	0.00268347	2.24765
ENSOARG00000005410	COLEC11	collectin sub-family member 11	Source:HGNC Symbol;Acc:HGNC:17213]	2	2.19142	4.54111	-5.86957	4.98482e-05	0.00268347	2.23368
ENSOARG00000004371	PIRT	phosphoinositide-interacting regulator of transient receptor potential channels	Source:HGNC Symbol;Acc:HGNC:37239]	11	3.26726	3.07411	-5.8519	5.13482e-05	0.00270441	2.23202
ENSOARG00000002104		Uncharacterized protein	Source:UniProtKB/TrEMBL;Acc:W5NVL7]	24	2.27718	3.57567	-5.85549	5.10392e-05	0.00270441	2.23753
ENSOARG00000005275	PXDN	peroxidasin	Source:HGNC Symbol;Acc:HGNC:14966]	2	1.76489	4.34055	-5.85332	5.12261e-05	0.00270441	2.21305
ENSOARG00000002045	NR3C1	Ovis aries nuclear receptor subfamily 3, group C, member 1 (glucocorticoid receptor) (NR3C1), mRNA.	Source:RefSeq mRNA;Acc:NM_001114186]	5	-1.55436	7.99585	5.85219	5.13228e-05	0.00270441	2.15829
ENSOARG00000003061	TMEM240	transmembrane protein 240	Source:HGNC Symbol;Acc:HGNC:25186]	12	-2.53999	5.00419	5.85882	5.07546e-05	0.00270441	2.20086
ENSOARG00000005666	CPXM1	carboxypeptidase X (M14 family), member 1	Source:HGNC Symbol;Acc:HGNC:15771]	13	3.64803	1.93273	-5.84423	5.20137e-05	0.00272854	2.13388
ENSOARG00000011245	NAPA	N-ethylmaleimide-sensitive factor attachment protein, alpha	Source:HGNC Symbol;Acc:HGNC:7641]	14	2.01234	5.98563	-5.83366	5.29461e-05	0.00274465	2.13441
ENSOARG00000003423	CYP1A1	Ovis aries cytochrome P4501A1 (CYP1A1), mRNA.	Source:RefSeq mRNA;Acc:NM_001129905]	18	-2.07079	4.70862	5.83452	5.28697e-05	0.00274465	2.16972
ENSOARG00000002968		Uncharacterized protein	Source:UniProtKB/TrEMBL;Acc:W5NYA8]	18	-2.34175	8.04606	5.83584	5.27522e-05	0.00274465	2.13126
ENSOARG00000008552	ARHGEF33	Rho guanine nucleotide exchange factor (GEF) 33	Source:HGNC Symbol;Acc:HGNC:37252]	3	2.52857	6.80623	-5.82688	5.35536e-05	0.00275751	2.11473
ENSOARG00000007754	SNX25	sorting nexin 25	Source:HGNC Symbol;Acc:HGNC:21883]	26	1.74777	5.38855	-5.82491	5.37307e-05	0.00275751	2.133
ENSOARG00000010167	NR2F2	nuclear receptor subfamily 2, group F, member 2	Source:HGNC Symbol;Acc:HGNC:7976]	18	-1.25602	12.9079	5.81706	5.4446e-05	0.00276791	2.11184
ENSOARG00000005423		Uncharacterized protein	Source:UniProtKB/TrEMBL;Acc:W5P5W4]	14	-1.62495	5.43968	5.81916	5.42535e-05	0.00276791	2.12025
ENSOARG00000010197	FBXO47	F-box protein 47	Source:HGNC Symbol;Acc:HGNC:31969]	11	-2.51251	5.63549	5.81248	5.4867e-05	0.00277318	2.10541
ENSOARG00000009234	AHR	aryl hydrocarbon receptor	Source:HGNC Symbol;Acc:HGNC:348]	4	-2.20052	5.73026	5.79474	5.65327e-05	0.00283029	2.07241
ENSOARG00000007828	SNTA1	syntrophin, alpha 1	Source:HGNC Symbol;Acc:HGNC:11167]	13	-1.38618	5.80604	5.78523	5.74474e-05	0.00285141	2.05481
ENSOARG00000003798	PLCE1	phospholipase C, epsilon 1	Source:HGNC Symbol;Acc:HGNC:17175]	22	-3.10092	2.23185	5.78362	5.76043e-05	0.00285141	2.08694
ENSOARG00000012924	ABHD17A	abhydrolase domain containing 17A	Source:HGNC Symbol;Acc:HGNC:28756]	5	2.5759	2.56295	-5.78107	5.78532e-05	0.00285301	2.10213
ENSOARG00000009465	ZBTB22	zinc finger and BTB domain containing 22	Source:HGNC Symbol;Acc:HGNC:13085]	20	-1.76959	5.6555	5.77754	5.81991e-05	0.00285936	2.04565
ENSOARG00000003511	CHRNA6	cholinergic receptor, nicotinic, alpha 6 (neuronal)	Source:HGNC Symbol;Acc:HGNC:15963]	26	1.87306	4.274	-5.77523	5.84266e-05	0.00285986	2.08701
ENSOARG00000011899	ZNF75D	zinc finger protein 75D	Source:HGNC Symbol;Acc:HGNC:13145]	X	2.11771	3.84289	-5.77058	5.88875e-05	0.00287175	2.09363
ENSOARG00000010447	EHD1	EH-domain containing 1	Source:HGNC Symbol;Acc:HGNC:3242]	21	4.20673	3.01378	-5.75531	6.04278e-05	0.00289328	2.07753
ENSOARG00000000209	LRIT1	leucine-rich repeat, immunoglobulin-like and transmembrane domains 1	Source:HGNC Symbol;Acc:HGNC:23404]	25	3.0118	3.26135	-5.75832	6.01205e-05	0.00289328	2.08455
ENSOARG00000008242	SRP68	signal recognition particle 68kDa	Source:HGNC Symbol;Acc:HGNC:11302]	11	2.70272	3.21034	-5.7615	5.97984e-05	0.00289328	2.08967
ENSOARG00000003349		Uncharacterized protein	Source:UniProtKB/TrEMBL;Acc:W5NZH2]	17	2.18382	2.70721	-5.75859	6.00933e-05	0.00289328	2.07706
ENSOARG00000005494	ZCCHC11	zinc finger, CCHC domain containing 11	Source:HGNC Symbol;Acc:HGNC:28981]	1	2.46097	4.26718	-5.74406	6.159e-05	0.00291711	2.0384
ENSOARG00000001125	TAS2R16	taste receptor, type 2, member 16	Source:HGNC Symbol;Acc:HGNC:14921]	4	-1.94575	4.47281	5.74486	6.15063e-05	0.00291711	2.02943
ENSOARG00000008311	MIB1	mindbomb E3 ubiquitin protein ligase 1	Source:HGNC Symbol;Acc:HGNC:21086]	23	4.01821	1.4488	-5.74113	6.18971e-05	0.00292114	1.88759
ENSOARG00000005464	CLIC1	chloride intracellular channel 1	Source:HGNC Symbol;Acc:HGNC:2062]	20	2.01126	5.11772	-5.72998	6.30779e-05	0.0029452	1.98311
ENSOARG00000000155	CPM	carboxypeptidase M	Source:HGNC Symbol;Acc:HGNC:2311]	3	1.45696	5.35602	-5.7072	6.55647e-05	0.00303452	1.93615
ENSOARG00000001746	CCDC54	coiled-coil domain containing 54	Source:HGNC Symbol;Acc:HGNC:30703]	1	-1.52276	8.24181	5.70912	6.53514e-05	0.00303452	1.9194
ENSOARG00000008687	ZNF341	zinc finger protein 341	Source:HGNC Symbol;Acc:HGNC:15992]	13	-4.32397	-0.186678	5.70615	6.56822e-05	0.00303452	1.25796
ENSOARG00000000220	LIN9	lin-9 DREAM MuvB core complex component	Source:HGNC Symbol;Acc:HGNC:30830]	12	3.33741	1.80463	-5.69589	6.68379e-05	0.00303467	1.8972
ENSOARG00000010277	CDC42BPG	CDC42 binding protein kinase gamma (DMPK-like)	Source:HGNC Symbol;Acc:HGNC:29829]	21	3.30381	2.32534	-5.69828	6.6567e-05	0.00303467	1.95846
ENSOARG00000000493	KDM4A	lysine (K)-specific demethylase 4A	Source:HGNC Symbol;Acc:HGNC:22978]	1	2.82291	7.98113	-5.69678	6.67365e-05	0.00303467	1.89738
ENSOARG00000011553	MFAP2	microfibrillar-associated protein 2	Source:HGNC Symbol;Acc:HGNC:7033]	2	-1.45236	5.55009	5.7039	6.59337e-05	0.00303467	1.92429
ENSOARG00000007698	SHC3	SHC (Src homology 2 domain containing) transforming protein 3	Source:HGNC Symbol;Acc:HGNC:18181]	2	-1.97147	5.87661	5.69797	6.66014e-05	0.00303467	1.90712
ENSOARG00000007478	PHKG2	Ovis aries phosphorylase kinase, gamma 2 (testis) (PHKG2), mRNA.	Source:RefSeq mRNA;Acc:NM_001142889]	24	3.83652	4.16798	-5.69287	6.71815e-05	0.00303979	1.95844
ENSOARG00000005108	DLL1	delta-like 1 (Drosophila)	Source:HGNC Symbol;Acc:HGNC:2908]	8	2.10022	4.00698	-5.6836	6.82503e-05	0.0030637	1.94557
ENSOARG00000009009	CD244	CD244 molecule, natural killer cell receptor 2B4	Source:HGNC Symbol;Acc:HGNC:18171]	1	1.78302	4.46941	-5.68025	6.86407e-05	0.0030637	1.92289
ENSOARG00000001881		Uncharacterized protein	Source:UniProtKB/TrEMBL;Acc:W5NUX6]	7	2.40268	3.29398	-5.6684	7.00407e-05	0.00310514	1.93914
ENSOARG00000009156	TP53RK	TP53 regulating kinase	Source:HGNC Symbol;Acc:HGNC:16197]	13	-1.57713	5.75218	5.66846	7.00335e-05	0.00310514	1.85953
ENSOARG00000007965	GPX8	glutathione peroxidase 8 (putative)	Source:HGNC Symbol;Acc:HGNC:33100]	16	2.89541	2.28663	-5.66229	7.07734e-05	0.00312709	1.90185
ENSOARG00000002461	CHEK2	checkpoint kinase 2	Source:HGNC Symbol;Acc:HGNC:16627]	17	-1.75461	4.76212	5.65703	7.14112e-05	0.00313424	1.872
ENSOARG00000004442	PCCA	propionyl CoA carboxylase, alpha polypeptide	Source:HGNC Symbol;Acc:HGNC:8653]	10	1.62443	5.07839	-5.65037	7.22281e-05	0.00315956	1.84992
ENSOARG00000010233	ESYT1	Uncharacterized protein	Source:UniProtKB/TrEMBL;Acc:W5PKK8]	3	1.67694	4.05536	-5.64591	7.27799e-05	0.00316246	1.88142
ENSOARG00000009053	RNF126	ring finger protein 126	Source:HGNC Symbol;Acc:HGNC:21151]	5	-1.92129	6.67536	5.64402	7.3015e-05	0.00316246	1.80666
ENSOARG00000010212	BIN3	bridging integrator 3	Source:HGNC Symbol;Acc:HGNC:1054]	2	-2.19474	6.11602	5.64041	7.34671e-05	0.00317161	1.80577
ENSOARG00000001836	PTRF	polymerase I and transcript release factor	Source:HGNC Symbol;Acc:HGNC:9688]	11	1.4942	8.07226	-5.62611	7.52847e-05	0.0032289	1.77794
ENSOARG00000009731	RGS13	regulator of G-protein signaling 13	Source:HGNC Symbol;Acc:HGNC:9995]	12	-1.97111	8.80011	5.61421	7.68341e-05	0.00327611	1.76073
ENSOARG00000012155	GPR152	G protein-coupled receptor 152	Source:HGNC Symbol;Acc:HGNC:23622]	21	2.31448	4.69532	-5.60798	7.76587e-05	0.00328788	1.79416
ENSOARG00000001777	RAB13	RAB13, member RAS oncogene family	Source:HGNC Symbol;Acc:HGNC:9762]	1	2.87198	3.16822	-5.58794	8.03724e-05	0.00336085	1.81
ENSOARG00000007040	MRPL37	mitochondrial ribosomal protein L37	Source:HGNC Symbol;Acc:HGNC:14034]	1	-1.96667	5.07911	5.59078	7.99821e-05	0.00336085	1.7499
ENSOARG00000008701	RNASEH2B	ribonuclease H2, subunit B	Source:HGNC Symbol;Acc:HGNC:25671]	10	2.24431	6.02811	-5.58117	8.13114e-05	0.00337776	1.70731
ENSOARG00000008156	GALR2	galanin receptor 2	Source:HGNC Symbol;Acc:HGNC:4133]	11	1.80492	4.2452	-5.58111	8.13207e-05	0.00337776	1.76568
ENSOARG00000007488	SPTA1	spectrin, alpha, erythrocytic 1	Source:HGNC Symbol;Acc:HGNC:11272]	1	1.99943	3.00888	-5.57506	8.21696e-05	0.00340229	1.78955
ENSOARG00000002572	OLIG3	oligodendrocyte transcription factor 3	Source:HGNC Symbol;Acc:HGNC:18003]	8	1.83645	8.13176	-5.57206	8.25945e-05	0.00340916	1.6861
ENSOARG00000004435				3	4.5533	6.81178	-5.56611	8.34424e-05	0.00342566	1.67566
ENSOARG00000010912	PDIA3	Ovis aries protein disulfide isomerase family A, member 3 (PDIA3), mRNA.	Source:RefSeq mRNA;Acc:NM_001163045]	18	2.08809	3.563	-5.5602	8.42951e-05	0.00342566	1.75602
ENSOARG00000012103	BAI3	brain-specific angiogenesis inhibitor 3	Source:HGNC Symbol;Acc:HGNC:945]	9	1.80646	4.43031	-5.56421	8.37155e-05	0.00342566	1.73056
ENSOARG00000005116	SSMEM1	serine-rich single-pass membrane protein 1	Source:HGNC Symbol;Acc:HGNC:29580]	4	-1.4165	5.80508	5.56335	8.38389e-05	0.00342566	1.6797
ENSOARG00000011669	OTOP3	otopetrin 3	Source:HGNC Symbol;Acc:HGNC:19658]	11	2.74197	1.98682	-5.55452	8.5122e-05	0.00342753	1.7092
ENSOARG00000003566	BRCC3	BRCA1/BRCA2-containing complex, subunit 3	Source:HGNC Symbol;Acc:HGNC:24185]	X	2.05953	4.47824	-5.55468	8.50994e-05	0.00342753	1.71241
ENSOARG00000009615	BRWD1	bromodomain and WD repeat domain containing 1	Source:HGNC Symbol;Acc:HGNC:12760]	1	-2.05029	5.03867	5.55508	8.50401e-05	0.00342753	1.68949
ENSOARG00000008597	SGMS2	sphingomyelin synthase 2	Source:HGNC Symbol;Acc:HGNC:28395]	6	-1.3777	8.87045	5.5438	8.6708e-05	0.00348074	1.64085
ENSOARG00000009328	MISP	mitotic spindle positioning	Source:HGNC Symbol;Acc:HGNC:27000]	5	1.76793	4.21262	-5.54101	8.71256e-05	0.00348688	1.7004
ENSOARG00000011026	PDSS2	prenyl (decaprenyl) diphosphate synthase, subunit 2	Source:HGNC Symbol;Acc:HGNC:23041]	8	3.0405	5.48129	-5.52711	8.9238e-05	0.00356059	1.63021
ENSOARG00000004043	GPN2	GPN-loop GTPase 2	Source:HGNC Symbol;Acc:HGNC:25513]	2	-1.72428	5.99866	5.52429	8.96726e-05	0.00356713	1.60921
ENSOARG00000009566	CDH13	cadherin 13	Source:HGNC Symbol;Acc:HGNC:1753]	14	5.82066	-0.536628	-5.51075	9.17915e-05	0.0036084	0.746312
ENSOARG00000011066	KCNQ5	potassium channel, voltage gated KQT-like subfamily Q, member 5	Source:HGNC Symbol;Acc:HGNC:6299]	9	-1.8661	5.25739	5.51187	9.16151e-05	0.0036084	1.60943
ENSOARG00000010183	CTTNBP2	Ovis aries cortactin binding protein 2 (CTTNBP2), mRNA.	Source:RefSeq mRNA;Acc:NM_001195311]	4	-2.36056	4.14833	5.51066	9.18064e-05	0.0036084	1.65291
ENSOARG00000007729	MED11	mediator complex subunit 11	Source:HGNC Symbol;Acc:HGNC:32687]	11	2.65539	2.5628	-5.50377	9.2905e-05	0.00361917	1.66718
ENSOARG00000005402	ZNF569	zinc finger protein 569	Source:HGNC Symbol;Acc:HGNC:24737]	14	1.50686	5.98084	-5.50432	9.2817e-05	0.00361917	1.57599
ENSOARG00000002129	COL5A1	collagen, type V, alpha 1	Source:HGNC Symbol;Acc:HGNC:2209]	3	-1.31705	8.04567	5.50505	9.27004e-05	0.00361917	1.57095
ENSOARG00000001919		Uncharacterized protein	Source:UniProtKB/TrEMBL;Acc:W5NV19]	JH922788.1	1.79361	3.56084	-5.49636	9.41022e-05	0.00364425	1.64999
ENSOARG00000003834	NSD1	nuclear receptor binding SET domain protein 1	Source:HGNC Symbol;Acc:HGNC:14234]	5	-1.6654	6.07055	5.49353	9.45633e-05	0.00365136	1.55564
ENSOARG00000005259	CNKSR1	connector enhancer of kinase suppressor of Ras 1	Source:HGNC Symbol;Acc:HGNC:19700]	2	-1.41923	9.97765	5.49103	9.49729e-05	0.00365646	1.55283
ENSOARG00000004464	KCTD15	potassium channel tetramerization domain containing 15	Source:HGNC Symbol;Acc:HGNC:23297]	14	1.59154	6.13884	-5.48175	9.65096e-05	0.00369402	1.5343
ENSOARG00000000330	IVL	involucrin	Source:HGNC Symbol;Acc:HGNC:6187]	1	3.43818	2.73167	-5.47709	9.72922e-05	0.00371318	1.62792
ENSOARG00000010134	ARMCX2	armadillo repeat containing, X-linked 2	Source:HGNC Symbol;Acc:HGNC:16869]	X	3.47986	2.45726	-5.46814	9.88113e-05	0.00374942	1.60555
ENSOARG00000008834	HSPA1L	heat shock 70kDa protein 1-like	Source:HGNC Symbol;Acc:HGNC:5234]	20	-1.74014	7.96371	5.46555	9.92562e-05	0.00375548	1.50255
ENSOARG00000011222	CLEC4F	C-type lectin domain family 4, member F	Source:HGNC Symbol;Acc:HGNC:25357]	3	2.57889	2.3857	-5.45446	0.000101182	0.00380646	1.58283
ENSOARG00000008722	RASA3	RAS p21 protein activator 3	Source:HGNC Symbol;Acc:HGNC:20331]	10	-1.48707	5.71821	5.45581	0.000100946	0.00380646	1.4974
ENSOARG00000011643	EMX1	empty spiracles homeobox 1	Source:HGNC Symbol;Acc:HGNC:3340]	3	1.80677	3.87338	-5.44851	0.000102232	0.00383501	1.55863
ENSOARG00000007534				10	2.12828	4.24099	-5.43974	0.000103801	0.00385009	1.52864
ENSOARG00000003498	RMI1	RecQ mediated genome instability 1	Source:HGNC Symbol;Acc:HGNC:25764]	2	-2.64446	4.40695	5.43972	0.000103803	0.00385009	1.52243
ENSOARG00000000339	CIR1	corepressor interacting with RBPJ, 1	Source:HGNC Symbol;Acc:HGNC:24217]	2	3.75975	2.72847	-5.43602	0.000104472	0.00386401	1.56173
ENSOARG00000001654	PPP6R1	protein phosphatase 6, regulatory subunit 1	Source:HGNC Symbol;Acc:HGNC:29195]	14	2.68106	1.49326	-5.42749	0.000106033	0.00390042	1.45183
ENSOARG00000005928	RPUSD3	RNA pseudouridylate synthase domain containing 3	Source:HGNC Symbol;Acc:HGNC:28437]	19	-1.56436	5.61072	5.4274	0.000106049	0.00390042	1.45189
ENSOARG00000000982	TMEM180	transmembrane protein 180	Source:HGNC Symbol;Acc:HGNC:26196]	22	3.04071	3.85161	-5.41823	0.000107753	0.00394107	1.51317
ENSOARG00000004604	TSC22D2	TSC22 domain family, member 2	Source:HGNC Symbol;Acc:HGNC:29095]	1	2.05393	4.3511	-5.41941	0.000107532	0.00394107	1.48878
ENSOARG00000002043	PLD6	phospholipase D family, member 6	Source:HGNC Symbol;Acc:HGNC:30447]	11	2.4092	3.56275	-5.41458	0.000108439	0.00395517	1.51492
ENSOARG00000009040	ATOX1	Ovis aries ATX1 antioxidant protein 1 homolog (yeast) (ATOX1), mRNA.	Source:RefSeq mRNA;Acc:NM_001009429]	5	1.97664	3.96204	-5.40533	0.0001102	0.00398205	1.48195
ENSOARG00000005379	RAB25	RAB25, member RAS oncogene family	Source:HGNC Symbol;Acc:HGNC:18238]	1	1.88579	4.0286	-5.40154	0.000110929	0.00398205	1.47255
ENSOARG00000001820		Uncharacterized protein	Source:UniProtKB/TrEMBL;Acc:W5NUS1]	1	1.59542	6.30756	-5.39957	0.00011131	0.00398205	1.39006
ENSOARG00000000542		Olfactory receptor	Source:UniProtKB/TrEMBL;Acc:W5NQV8]	15	1.37292	5.70742	-5.39902	0.000111418	0.00398205	1.40055
ENSOARG00000002342	SH3RF2	SH3 domain containing ring finger 2	Source:HGNC Symbol;Acc:HGNC:26299]	5	-1.19489	7.09736	5.40272	0.000110701	0.00398205	1.39124
ENSOARG00000001082	KRBA2	KRAB-A domain containing 2	Source:HGNC Symbol;Acc:HGNC:26989]	11	-1.63689	5.06957	5.40224	0.000110794	0.00398205	1.42743
ENSOARG00000002944	IBSP	integrin-binding sialoprotein	Source:HGNC Symbol;Acc:HGNC:5341]	6	2.2998	2.73874	-5.39189	0.00011281	0.00399291	1.49111
ENSOARG00000006375	FKBP15	FK506 binding protein 15, 133kDa	Source:HGNC Symbol;Acc:HGNC:23397]	2	1.58314	3.4859	-5.39307	0.000112579	0.00399291	1.48003
ENSOARG00000008479	SUMF1	sulfatase modifying factor 1	Source:HGNC Symbol;Acc:HGNC:20376]	19	-2.09788	7.29643	5.39301	0.00011259	0.00399291	1.37484
ENSOARG00000009064	IKZF5	IKAROS family zinc finger 5 (Pegasus)	Source:HGNC Symbol;Acc:HGNC:14283]	22	2.56127	3.11048	-5.35754	0.000119779	0.00415656	1.43238
ENSOARG00000001421	STX19	syntaxin 19	Source:HGNC Symbol;Acc:HGNC:19300]	1	2.14723	7.13228	-5.3574	0.000119809	0.00415656	1.3131
ENSOARG00000002599		Uncharacterized protein	Source:UniProtKB/TrEMBL;Acc:W5NX62]	X	2.03747	5.2933	-5.35669	0.000119958	0.00415656	1.34154
ENSOARG00000000960	XPO6	exportin 6	Source:HGNC Symbol;Acc:HGNC:19733]	24	1.79024	4.95907	-5.36035	0.000119192	0.00415656	1.36169
ENSOARG00000012147	NPR3	natriuretic peptide receptor 3	Source:HGNC Symbol;Acc:HGNC:7945]	16	1.71538	4.87114	-5.36594	0.000118034	0.00415656	1.37415
ENSOARG00000004355	GATB	glutamyl-tRNA(Gln) amidotransferase, subunit B	Source:HGNC Symbol;Acc:HGNC:8849]	17	1.43823	5.07528	-5.35696	0.000119901	0.00415656	1.34993
ENSOARG00000010286	DNAJC6	DnaJ (Hsp40) homolog, subfamily C, member 6	Source:HGNC Symbol;Acc:HGNC:15469]	1	-1.74782	5.79289	5.36395	0.000118446	0.00415656	1.33772
ENSOARG00000012320	EYS	eyes shut homolog (Drosophila)	Source:HGNC Symbol;Acc:HGNC:21555]	9	-2.13566	4.98743	5.3616	0.000118932	0.00415656	1.36152
ENSOARG00000005185	SH3YL1	SH3 and SYLF domain containing 1	Source:HGNC Symbol;Acc:HGNC:29546]	2	-1.741	5.02388	5.35304	0.000120726	0.00417217	1.34556
ENSOARG00000003689	RPS28	ribosomal protein S28	Source:HGNC Symbol;Acc:HGNC:10418]	5	2.60262	3.46191	-5.34856	0.000121675	0.00417533	1.40751
ENSOARG00000011029	N4BP2L1	NEDD4 binding protein 2-like 1	Source:HGNC Symbol;Acc:HGNC:25037]	10	1.7252	4.40886	-5.34892	0.000121598	0.00417533	1.36518
ENSOARG00000010739	UPF1	UPF1 regulator of nonsense transcripts homolog (yeast)	Source:HGNC Symbol;Acc:HGNC:9962]	5	-1.59529	5.62884	5.3474	0.000121922	0.00417533	1.31269
ENSOARG00000000449	SH2D7	SH2 domain containing 7	Source:HGNC Symbol;Acc:HGNC:34549]	18	-1.80273	3.97845	5.34663	0.000122086	0.00417533	1.38065
ENSOARG00000002875		Uncharacterized protein	Source:UniProtKB/TrEMBL;Acc:W5NY10]	JH923374.1	-1.48717	6.23177	5.34149	0.000123188	0.00420212	1.28956
ENSOARG00000011756	HSPH1	heat shock 105kDa/110kDa protein 1	Source:HGNC Symbol;Acc:HGNC:16969]	10	-1.55298	5.86258	5.33189	0.000125277	0.00425261	1.28002
ENSOARG00000008629	PLIN3	perilipin 3	Source:HGNC Symbol;Acc:HGNC:16893]	5	-1.5755	6.96799	5.33172	0.000125314	0.00425261	1.26815
ENSOARG00000002588	EPG5	ectopic P-granules autophagy protein 5 homolog (C. elegans)	Source:HGNC Symbol;Acc:HGNC:29331]	23	2.42013	4.88686	-5.32997	0.000125698	0.00425465	1.3126
ENSOARG00000005920	NUBP1	nucleotide binding protein 1	Source:HGNC Symbol;Acc:HGNC:8041]	24	1.418	4.13288	-5.32627	0.000126515	0.00426042	1.33892
ENSOARG00000010150	PHKG1	phosphorylase kinase, gamma 1 (muscle)	Source:HGNC Symbol;Acc:HGNC:8930]	24	-2.09462	4.01987	5.3275	0.000126243	0.00426042	1.34567
ENSOARG00000011412	CIRBP	cold inducible RNA binding protein	Source:HGNC Symbol;Acc:HGNC:1982]	5	1.60699	5.37418	-5.32405	0.000127007	0.00426609	1.28138
ENSOARG00000002230		Uncharacterized protein	Source:UniProtKB/TrEMBL;Acc:W5NW12]	JH922363.1	-1.91118	5.56628	5.32158	0.00012756	0.00427374	1.27219
ENSOARG00000007997	BARX1	BARX homeobox 1	Source:HGNC Symbol;Acc:HGNC:955]	2	-1.89164	5.66685	5.31989	0.000127938	0.00427552	1.26482
ENSOARG00000006451	GATSL3	GATS protein-like 3	Source:HGNC Symbol;Acc:HGNC:34423]	17	-1.96237	3.34046	5.31518	0.000128998	0.00430005	1.35376
ENSOARG00000011634	SPR	sepiapterin reductase (7,8-dihydrobiopterin:NADP+ oxidoreductase)	Source:HGNC Symbol;Acc:HGNC:11257]	3	2.90758	3.69572	-5.31332	0.00012942	0.00430323	1.33972
ENSOARG00000004831	CCL14	chemokine (C-C motif) ligand 14	Source:HGNC Symbol;Acc:HGNC:10612]	11	2.41736	3.19973	-5.31061	0.000130037	0.00431286	1.35221
ENSOARG00000001047	ATP6V0E2	ATPase, H+ transporting V0 subunit e2	Source:HGNC Symbol;Acc:HGNC:21723]	4	2.11605	4.88866	-5.30694	0.000130876	0.00431891	1.27205
ENSOARG00000002026	COPS4	COP9 signalosome subunit 4	Source:HGNC Symbol;Acc:HGNC:16702]	6	-1.3492	7.26656	5.30719	0.000130818	0.00431891	1.2252
ENSOARG00000006726	HSPB11	heat shock protein family B (small), member 11	Source:HGNC Symbol;Acc:HGNC:25019]	1	-2.9337	3.91778	5.30547	0.000131214	0.00431924	1.31397
ENSOARG00000006522	LRPPRC	leucine-rich pentatricopeptide repeat containing	Source:HGNC Symbol;Acc:HGNC:15714]	3	-1.64534	6.80776	5.30118	0.000132206	0.00433025	1.2151
ENSOARG00000006054	GAREM	GRB2 associated, regulator of MAPK1	Source:HGNC Symbol;Acc:HGNC:26136]	23	1.5683	4.58546	-5.29633	0.000133335	0.00434561	1.26631
ENSOARG00000000403	FAM217A	family with sequence similarity 217, member A	Source:HGNC Symbol;Acc:HGNC:21362]	20	1.78092	7.08886	-5.29263	0.000134205	0.00435241	1.20006
ENSOARG00000006889		Uncharacterized protein	Source:UniProtKB/TrEMBL;Acc:W5PAC2]	23	-1.46432	6.41264	5.2935	0.000134	0.00435241	1.20412
ENSOARG00000009476	DLG5	discs, large homolog 5 (Drosophila)	Source:HGNC Symbol;Acc:HGNC:2904]	25	3.91834	3.68784	-5.27478	0.000138483	0.00442574	1.27845
ENSOARG00000002420	GSTZ1	glutathione S-transferase zeta 1	Source:HGNC Symbol;Acc:HGNC:4643]	7	2.15109	2.1792	-5.2776	0.000137798	0.00442574	1.29165
ENSOARG00000007614	ACSL1	acyl-CoA synthetase long-chain family member 1	Source:HGNC Symbol;Acc:HGNC:3569]	26	1.99225	7.7757	-5.27716	0.000137903	0.00442574	1.17453
ENSOARG00000000950	A2M	alpha-2-macroglobulin	Source:HGNC Symbol;Acc:HGNC:7]	3	1.50509	6.29302	-5.27527	0.000138364	0.00442574	1.17387
ENSOARG00000012433	VPS13A	vacuolar protein sorting 13 homolog A (S. cerevisiae)	Source:HGNC Symbol;Acc:HGNC:1908]	2	-2.69977	3.93278	5.27897	0.000137467	0.00442574	1.26934
ENSOARG00000006731	PRSS38	protease, serine, 38	Source:HGNC Symbol;Acc:HGNC:29625]	5	3.44922	0.650258	-5.27236	0.000139074	0.00443386	0.960521
ENSOARG00000004619	TAC1	protachykinin-1 precursor	Source:RefSeq peptide;Acc:NP_001076065]	4	2.38645	3.62291	-5.26505	0.000140875	0.00446964	1.26009
ENSOARG00000003599		Uncharacterized protein	Source:UniProtKB/TrEMBL;Acc:W5P090]	24	2.52547	3.1613	-5.25771	0.000142708	0.00451691	1.26518
ENSOARG00000004497	ZNF445	zinc finger protein 445	Source:HGNC Symbol;Acc:HGNC:21018]	19	2.35943	3.18024	-5.24832	0.000145087	0.00457276	1.24849
ENSOARG00000004443	XRN2	5'-3' exoribonuclease 2	Source:HGNC Symbol;Acc:HGNC:12836]	13	-1.62563	3.65941	5.24801	0.000145167	0.00457276	1.2269
ENSOARG00000003817	RYR2	ryanodine receptor 2 (cardiac)	Source:HGNC Symbol;Acc:HGNC:10484]	25	-1.53009	5.77727	5.23912	0.000147459	0.00463386	1.11952
ENSOARG00000007152	TM4SF5	transmembrane 4 L six family member 5	Source:HGNC Symbol;Acc:HGNC:11857]	11	-3.34912	1.54875	5.23434	0.000148709	0.00465095	1.16803
ENSOARG00000009366	ASTE1	asteroid homolog 1 (Drosophila)	Source:HGNC Symbol;Acc:HGNC:25021]	1	3.27799	2.9321	-5.22963	0.000149949	0.0046585	1.22335
ENSOARG00000009769	TRAF3IP2	TRAF3 interacting protein 2	Source:HGNC Symbol;Acc:HGNC:1343]	8	1.3897	6.37501	-5.23011	0.000149822	0.0046585	1.09345
ENSOARG00000010800	PRDX2	Ovis aries peroxiredoxin 2 (PRDX2), nuclear gene encoding mitochondrial protein, mRNA.	Source:RefSeq mRNA;Acc:NM_001166200]	5	-4.37523	0.0122598	5.22789	0.000150411	0.00465992	0.753157
ENSOARG00000005874	ARHGEF25	Rho guanine nucleotide exchange factor (GEF) 25	Source:HGNC Symbol;Acc:HGNC:30275]	3	3.28469	4.84684	-5.2255	0.000151046	0.00466858	1.13474
ENSOARG00000004940	FOXG1	forkhead box G1	Source:HGNC Symbol;Acc:HGNC:3811]	18	2.28886	2.98937	-5.221	0.00015225	0.00468378	1.20731
ENSOARG00000012164	TULP1	tubby like protein 1	Source:HGNC Symbol;Acc:HGNC:12423]	20	3.68403	3.91826	-5.20762	0.000155893	0.00471128	1.15278
ENSOARG00000006431	INSRR	insulin receptor-related receptor	Source:HGNC Symbol;Acc:HGNC:6093]	1	3.41803	2.4644	-5.20981	0.000155292	0.00471128	1.18936
ENSOARG00000009671	GTF2H1	general transcription factor IIH, polypeptide 1, 62kDa	Source:HGNC Symbol;Acc:HGNC:4655]	21	2.17325	1.73239	-5.21236	0.000154593	0.00471128	1.15756
ENSOARG00000003003		Uncharacterized protein	Source:UniProtKB/TrEMBL;Acc:W5NYE5]	1	1.59588	4.47757	-5.21188	0.000154723	0.00471128	1.12588
ENSOARG00000000698	MLLT10	myeloid/lymphoid or mixed-lineage leukemia (trithorax homolog, Drosophila); translocated to, 10	Source:HGNC Symbol;Acc:HGNC:16063]	13	-1.33826	5.53407	5.20934	0.00015542	0.00471128	1.07464
ENSOARG00000001657		Uncharacterized protein	Source:UniProtKB/TrEMBL;Acc:W5NU98]	JH921747.1	-2.03835	4.96101	5.21302	0.000154414	0.00471128	1.10482
ENSOARG00000007108	ARHGEF7	Rho guanine nucleotide exchange factor (GEF) 7	Source:HGNC Symbol;Acc:HGNC:15607]	10	-1.3079	6.37564	5.20579	0.0001564	0.00471239	1.05035
ENSOARG00000006385	ZNRF1	zinc and ring finger 1, E3 ubiquitin protein ligase	Source:HGNC Symbol;Acc:HGNC:18452]	14	2.04501	4.43035	-5.20312	0.00015714	0.00472389	1.1147
ENSOARG00000001951	PAX4	paired box 4	Source:HGNC Symbol;Acc:HGNC:8618]	4	-3.66225	0.133955	5.2013	0.000157647	0.00472832	0.784773
ENSOARG00000010333	CALB1	calbindin 1, 28kDa	Source:HGNC Symbol;Acc:HGNC:1434]	9	1.79976	4.69705	-5.19495	0.000159426	0.00475361	1.08587
ENSOARG00000007054		Uncharacterized protein	Source:UniProtKB/TrEMBL;Acc:W5PAU6]	15	-1.42992	4.36054	5.19634	0.000159035	0.00475361	1.10367
ENSOARG00000009428	NDUFAF7	NADH dehydrogenase (ubiquinone) complex I, assembly factor 7	Source:HGNC Symbol;Acc:HGNC:28816]	3	-1.74653	5.46952	5.19346	0.000159849	0.00475361	1.04896
ENSOARG00000008615	KPNA3	karyopherin alpha 3 (importin alpha 4)	Source:HGNC Symbol;Acc:HGNC:6396]	10	-2.30412	3.65756	5.19316	0.000159934	0.00475361	1.13399
ENSOARG00000006615		Uncharacterized protein	Source:UniProtKB/TrEMBL;Acc:W5P9H5]	19	2.96876	2.48773	-5.18372	0.000162628	0.00479043	1.14729
ENSOARG00000001141		Uncharacterized protein	Source:UniProtKB/TrEMBL;Acc:W5NSP1]	JH924490.1	-1.36148	6.68762	5.18437	0.000162441	0.00479043	1.01057
ENSOARG00000009860	ROR1	receptor tyrosine kinase-like orphan receptor 1	Source:HGNC Symbol;Acc:HGNC:10256]	1	2.30227	3.04654	-5.18088	0.00016345	0.00480389	1.13842
ENSOARG00000008143	SMPDL3A	sphingomyelin phosphodiesterase, acid-like 3A	Source:HGNC Symbol;Acc:HGNC:17389]	8	-1.55535	5.99754	5.17958	0.000163825	0.00480419	1.01152
ENSOARG00000008066	FIGNL1	fidgetin-like 1	Source:HGNC Symbol;Acc:HGNC:13286]	4	-1.49871	7.32891	5.17245	0.000165909	0.004833	0.988624
ENSOARG00000006745	ABCG5	ATP-binding cassette, sub-family G (WHITE), member 5	Source:HGNC Symbol;Acc:HGNC:13886]	3	-1.22594	7.68171	5.16544	0.000167985	0.00487193	0.977533
ENSOARG00000011279	PHF13	PHD finger protein 13	Source:HGNC Symbol;Acc:HGNC:22983]	12	5.02901	1.04907	-5.16097	0.00016932	0.00488913	0.945849
ENSOARG00000004707	TOM1L1	target of myb1 (chicken)-like 1	Source:HGNC Symbol;Acc:HGNC:11983]	11	1.36171	4.24206	-5.16126	0.000169233	0.00488913	1.05022
ENSOARG00000003600	ACYP2	acylphosphatase 2, muscle type	Source:HGNC Symbol;Acc:HGNC:180]	3	4.51704	0.944438	-5.15623	0.000170752	0.00491966	0.923599
ENSOARG00000004708	REEP3	receptor accessory protein 3	Source:HGNC Symbol;Acc:HGNC:23711]	25	2.12382	5.4057	-5.15179	0.000172102	0.00494776	0.981064
ENSOARG00000006875	SNAP47	synaptosomal-associated protein, 47kDa	Source:HGNC Symbol;Acc:HGNC:30669]	5	2.32721	4.3371	-5.14876	0.00017303	0.00496358	1.02468
ENSOARG00000007259	TUBGCP3	tubulin, gamma complex associated protein 3	Source:HGNC Symbol;Acc:HGNC:18598]	10	1.92361	5.81992	-5.14182	0.000175177	0.00498453	0.949271
ENSOARG00000000694	SART1	squamous cell carcinoma antigen recognized by T cells	Source:HGNC Symbol;Acc:HGNC:10538]	21	1.72463	5.48703	-5.14151	0.000175274	0.00498453	0.959329
ENSOARG00000008290	C14orf79	chromosome 14 open reading frame 79	Source:HGNC Symbol;Acc:HGNC:20126]	18	-1.90571	5.56766	5.14165	0.000175229	0.00498453	0.955454
ENSOARG00000009456	MXI1	MAX interactor 1, dimerization protein	Source:HGNC Symbol;Acc:HGNC:7534]	22	3.02649	1.42316	-5.13942	0.000175926	0.00499228	1.00111
ENSOARG00000000679	TSPO2	translocator protein 2	Source:HGNC Symbol;Acc:HGNC:21256]	20	4.03001	3.09874	-5.12836	0.000179419	0.00506954	1.05145
ENSOARG00000005266	POLR2I	polymerase (RNA) II (DNA directed) polypeptide I, 14.5kDa	Source:HGNC Symbol;Acc:HGNC:9196]	14	1.96025	3.296	-5.12425	0.000180737	0.00508736	1.03359
ENSOARG00000008827	NCSTN	nicastrin	Source:HGNC Symbol;Acc:HGNC:17091]	1	-1.96171	5.81432	5.12398	0.000180822	0.00508736	0.917289
ENSOARG00000003545	MED28	mediator complex subunit 28	Source:HGNC Symbol;Acc:HGNC:24628]	6	-1.34368	6.65969	5.12147	0.000181633	0.00509926	0.900131
ENSOARG00000012750	FAM195A	family with sequence similarity 195, member A	Source:HGNC Symbol;Acc:HGNC:14142]	24	-3.15756	6.05451	5.1172	0.000183019	0.00511636	0.902841
ENSOARG00000004301	STK39	serine threonine kinase 39	Source:HGNC Symbol;Acc:HGNC:17717]	2	2.1571	4.17716	-5.1137	0.000184161	0.00513739	0.971261
ENSOARG00000001726	ALX4	ALX homeobox 4	Source:HGNC Symbol;Acc:HGNC:450]	15	3.47086	2.91418	-5.10928	0.000185618	0.00515618	1.02251
ENSOARG00000000738		Uncharacterized protein	Source:UniProtKB/TrEMBL;Acc:W5NRG4]	AMGL01126506.1	-1.39079	6.29426	5.10744	0.000186226	0.00515865	0.877774
ENSOARG00000008277	OGN	osteoglycin	Source:HGNC Symbol;Acc:HGNC:8126]	2	-2.04922	5.19487	5.10665	0.00018649	0.00515865	0.90788
ENSOARG00000010119		Uncharacterized protein	Source:UniProtKB/TrEMBL;Acc:W5PK83]	5	4.2306	-0.390086	-5.1021	0.000188006	0.005182	0.411488
ENSOARG00000002344	MECR	mitochondrial trans-2-enoyl-CoA reductase	Source:HGNC Symbol;Acc:HGNC:19691]	2	-1.63803	3.89776	5.10176	0.000188122	0.005182	0.963817
ENSOARG00000002997	GAB3	GRB2-associated binding protein 3	Source:HGNC Symbol;Acc:HGNC:17515]	X	1.25154	7.56311	-5.0982	0.000189317	0.00519346	0.85803
ENSOARG00000005405	RNFT2	ring finger protein, transmembrane 2	Source:HGNC Symbol;Acc:HGNC:25905]	17	-1.44087	5.10046	5.09818	0.000189326	0.00519346	0.896566
ENSOARG00000011486	MYH1	myosin, heavy chain 1, skeletal muscle, adult	Source:HGNC Symbol;Acc:HGNC:7567]	11	-1.51901	7.9398	5.09617	0.000190005	0.00520125	0.856238
ENSOARG00000001068	ADAM21	ADAM metallopeptidase domain 21	Source:HGNC Symbol;Acc:HGNC:200]	7	-1.76042	6.72803	5.09221	0.00019135	0.00522033	0.847558
ENSOARG00000001469	SUV420H2	suppressor of variegation 4-20 homolog 2 (Drosophila)	Source:HGNC Symbol;Acc:HGNC:28405]	14	2.52788	4.49486	-5.08617	0.000193423	0.00522956	0.907669
ENSOARG00000003417	EHMT2	euchromatic histone-lysine N-methyltransferase 2	Source:HGNC Symbol;Acc:HGNC:14129]	20	2.00036	4.89691	-5.08494	0.000193848	0.00523031	0.88374
ENSOARG00000012440	GDF15	Uncharacterized protein	Source:UniProtKB/TrEMBL;Acc:W5PSA2]	5	-1.31858	4.9942	5.08375	0.000194261	0.00523073	0.875442
ENSOARG00000009786		Uncharacterized protein	Source:UniProtKB/TrEMBL;Acc:W5PJ68]	2	2.13413	3.94753	-5.08231	0.000194762	0.00523349	0.929781
ENSOARG00000009047		Uncharacterized protein	Source:UniProtKB/TrEMBL;Acc:W5PGZ3]	26	-1.62625	6.80625	5.07487	0.000197363	0.00528187	0.816336
ENSOARG00000007695	PNPO	pyridoxamine 5'-phosphate oxidase	Source:HGNC Symbol;Acc:HGNC:30260]	11	-2.34578	3.87669	5.07197	0.000198388	0.00529853	0.913634
ENSOARG00000001822	SFXN2	sideroflexin 2	Source:HGNC Symbol;Acc:HGNC:16086]	22	2.00786	7.3674	-5.07039	0.000198949	0.00530276	0.808305
ENSOARG00000000086	KRTAP3-1	keratin associated protein 3-1	Source:HGNC Symbol;Acc:HGNC:16778]	11	1.5344	7.82175	-5.06271	0.000201697	0.00536515	0.796184
ENSOARG00000000912		Annexin	Source:UniProtKB/TrEMBL;Acc:W5NS06]	25	-1.59712	6.70302	5.05654	0.000203937	0.00540289	0.783984
ENSOARG00000011985	FAM166B	family with sequence similarity 166, member B	Source:HGNC Symbol;Acc:HGNC:34242]	2	2.14581	4.26031	-5.05405	0.000204847	0.00540524	0.862555
ENSOARG00000005787	WFS1	Wolfram syndrome 1 (wolframin)	Source:HGNC Symbol;Acc:HGNC:12762]	6	5.71801	-0.123319	-5.05212	0.000205554	0.00541143	0.421018
ENSOARG00000002888	SPDL1	spindle apparatus coiled-coil protein 1	Source:HGNC Symbol;Acc:HGNC:26010]	16	-2.38063	6.51294	5.05117	0.000205903	0.00541143	0.778778
ENSOARG00000009759	ITCH	itchy E3 ubiquitin protein ligase	Source:HGNC Symbol;Acc:HGNC:13890]	13	-1.46439	5.90157	5.04471	0.000208297	0.00545258	0.773259
ENSOARG00000005431	MOCOS	molybdenum cofactor sulfurase	Source:HGNC Symbol;Acc:HGNC:18234]	23	1.59819	5.08609	-5.04334	0.000208808	0.00545421	0.801441
ENSOARG00000008609	AP3M1	adaptor-related protein complex 3, mu 1 subunit	Source:HGNC Symbol;Acc:HGNC:569]	25	-1.51161	5.07127	5.04122	0.000209602	0.00545421	0.797688
ENSOARG00000007457	PDC	phosducin	Source:HGNC Symbol;Acc:HGNC:8759]	12	1.93003	5.07026	-5.03998	0.00021007	0.0054556	0.797481
ENSOARG00000009076	USP14	ubiquitin specific peptidase 14 (tRNA-guanine transglycosylase)	Source:HGNC Symbol;Acc:HGNC:12612]	23	3.75118	0.539967	-5.03497	0.000211964	0.00549395	0.660767
ENSOARG00000002084	GDF3	growth differentiation factor 3	Source:HGNC Symbol;Acc:HGNC:4218]	3	-1.54146	6.8831	5.03377	0.000212417	0.00549488	0.742945
ENSOARG00000006984		Uncharacterized protein	Source:UniProtKB/TrEMBL;Acc:W5PAL9]	2	1.68215	4.24193	-5.03214	0.00021304	0.00550019	0.82438
ENSOARG00000001827	SLC25A29	solute carrier family 25 (mitochondrial carnitine/acylcarnitine carrier), member 29	Source:HGNC Symbol;Acc:HGNC:20116]	18	3.12068	3.94038	-5.0299	0.000213896	0.00550071	0.842647
ENSOARG00000011894	ATM	ATM serine/threonine kinase	Source:HGNC Symbol;Acc:HGNC:795]	15	-1.72479	5.18897	5.0302	0.000213782	0.00550071	0.772389
ENSOARG00000005764				2	1.41977	6.36913	-5.0273	0.000214894	0.0055156	0.734842
ENSOARG00000002865	MEPE	matrix extracellular phosphoglycoprotein	Source:HGNC Symbol;Acc:HGNC:13361]	6	2.27746	2.35408	-5.02395	0.000216188	0.00551658	0.88295
ENSOARG00000011868	EIF4H	eukaryotic translation initiation factor 4H	Source:HGNC Symbol;Acc:HGNC:12741]	24	-3.78163	0.0700178	5.02455	0.000215955	0.00551658	0.507229
ENSOARG00000010329	ZBTB24	zinc finger and BTB domain containing 24	Source:HGNC Symbol;Acc:HGNC:21143]	8	2.1826	3.20397	-5.02182	0.000217015	0.00552695	0.862641
ENSOARG00000012585		Uncharacterized protein	Source:UniProtKB/TrEMBL;Acc:W5PSQ7]	17	-2.12532	4.1987	5.01973	0.00021783	0.00553701	0.804697
ENSOARG00000008783	BSG	basigin (Ok blood group)	Source:HGNC Symbol;Acc:HGNC:1116]	5	3.24301	1.63319	-5.01755	0.000218683	0.00554796	0.835533
ENSOARG00000006933	RSF1	remodeling and spacing factor 1	Source:HGNC Symbol;Acc:HGNC:18118]	21	1.74646	3.3804	-5.00718	0.000222792	0.00562207	0.829345
ENSOARG00000005722	EPAS1	Uncharacterized protein	Source:UniProtKB/TrEMBL;Acc:W5P6T6]	3	-1.28584	7.69532	5.00588	0.000223312	0.00562207	0.694211
ENSOARG00000011035	FDCSP	follicular dendritic cell secreted protein	Source:HGNC Symbol;Acc:HGNC:19215]	6	-1.54787	6.45385	5.004	0.000224065	0.00563026	0.691776
ENSOARG00000008702		Uncharacterized protein	Source:UniProtKB/TrEMBL;Acc:W5PFX6]	1	4.57382	-0.0788488	-4.99946	0.000225899	0.00566554	0.384189
ENSOARG00000011101	LPXN	leupaxin	Source:HGNC Symbol;Acc:HGNC:14061]	15	-1.51857	6.52212	4.99544	0.000227536	0.00568496	0.676315
ENSOARG00000008612	IQCD	IQ motif containing D	Source:HGNC Symbol;Acc:HGNC:25168]	17	-3.228	1.03146	4.99395	0.000228147	0.00568941	0.721514
ENSOARG00000013148	ZSCAN2	zinc finger and SCAN domain containing 2	Source:HGNC Symbol;Acc:HGNC:20994]	18	3.69832	1.22678	-4.98942	0.000230011	0.00569515	0.736241
ENSOARG00000011759	SRI	sorcin	Source:RefSeq peptide;Acc:NP_001157075]	4	2.74799	4.5048	-4.99124	0.000229259	0.00569515	0.740245
ENSOARG00000008521	SHC2	SHC (Src homology 2 domain containing) transforming protein 2	Source:HGNC Symbol;Acc:HGNC:29869]	5	1.95144	3.82499	-4.99056	0.000229541	0.00569515	0.775699
ENSOARG00000009567	SMU1	smu-1 suppressor of mec-8 and unc-52 homolog (C. elegans)	Source:HGNC Symbol;Acc:HGNC:18247]	2	-1.97861	4.79477	4.98919	0.000230107	0.00569515	0.718836
ENSOARG00000002365	USP22	ubiquitin specific peptidase 22	Source:HGNC Symbol;Acc:HGNC:12621]	11	2.57707	2.79733	-4.98697	0.000231027	0.00570718	0.817916
ENSOARG00000005242	GRPEL2	GrpE-like 2, mitochondrial (E. coli)	Source:HGNC Symbol;Acc:HGNC:21060]	5	4.4856	2.6943	-4.98566	0.000231569	0.00570987	0.81932
ENSOARG00000007854		Uncharacterized protein	Source:UniProtKB/TrEMBL;Acc:W5PDB7]	4	-1.32835	5.53205	4.98278	0.000232773	0.00572882	0.674222
ENSOARG00000008288	NECAB3	N-terminal EF-hand calcium binding protein 3	Source:HGNC Symbol;Acc:HGNC:15851]	13	-2.01064	6.59711	4.9814	0.000233352	0.00573237	0.651074
ENSOARG00000004092		Claudin	Source:UniProtKB/TrEMBL;Acc:W5P1S2]	26	2.52539	5.49245	-4.97984	0.000234004	0.00573768	0.673157
ENSOARG00000000090	AP1M1	adaptor-related protein complex 1, mu 1 subunit	Source:HGNC Symbol;Acc:HGNC:13667]	5	-1.28456	5.32349	4.9771	0.000235162	0.00574467	0.671927
ENSOARG00000005792	TLR4	Ovis aries toll-like receptor 4 (TLR4), mRNA.	Source:RefSeq mRNA;Acc:NM_001135930]	2	-1.46377	5.42288	4.97309	0.000236862	0.0057755	0.661121
ENSOARG00000008973	EPDR1	ependymin related 1	Source:HGNC Symbol;Acc:HGNC:17572]	4	-1.49715	6.29087	4.96889	0.00023866	0.00579875	0.631098
ENSOARG00000001109	HMGN5	high mobility group nucleosome binding domain 5	Source:HGNC Symbol;Acc:HGNC:8013]	X	-1.52089	4.73192	4.96881	0.000238697	0.00579875	0.685199
ENSOARG00000007015	CYB5RL	cytochrome b5 reductase-like	Source:HGNC Symbol;Acc:HGNC:32220]	1	-1.61623	5.46645	4.96376	0.000240877	0.00584093	0.642851
ENSOARG00000012470	SH3TC1	SH3 domain and tetratricopeptide repeats 1	Source:HGNC Symbol;Acc:HGNC:26009]	6	-1.51581	7.70765	4.96018	0.000242431	0.00586781	0.612425
ENSOARG00000004869	UTP15	UTP15, U3 small nucleolar ribonucleoprotein, homolog (S. cerevisiae)	Source:HGNC Symbol;Acc:HGNC:25758]	16	1.90906	3.16058	-4.95782	0.000243464	0.00588201	0.754074
ENSOARG00000000217		Beta-defensin	Source:UniProtKB/TrEMBL;Acc:W5NPW0]	13	3.31022	1.59701	-4.9566	0.000244001	0.00588418	0.73444
ENSOARG00000010569	TAS1R2	Uncharacterized protein	Source:UniProtKB/TrEMBL;Acc:W5PLL9]	2	4.76641	2.35772	-4.94964	0.000247081	0.00591517	0.756538
ENSOARG00000007672	DZIP1L	DAZ interacting zinc finger protein 1-like	Source:HGNC Symbol;Acc:HGNC:26551]	1	2.0971	7.25754	-4.95214	0.000245968	0.00591517	0.596942
ENSOARG00000008743	CNTN4	contactin 4	Source:HGNC Symbol;Acc:HGNC:2174]	19	-1.11629	6.38332	4.94795	0.000247835	0.00591517	0.592146
ENSOARG00000005765	TAS2R1	taste receptor, type 2, member 1	Source:HGNC Symbol;Acc:HGNC:14909]	16	-1.21364	5.6085	4.94911	0.000247317	0.00591517	0.610876
ENSOARG00000003278	CCDC170	coiled-coil domain containing 170	Source:HGNC Symbol;Acc:HGNC:21177]	8	-1.36916	6.4351	4.94838	0.000247643	0.00591517	0.592364
ENSOARG00000002433	DDX3X	DEAD (Asp-Glu-Ala-Asp) box helicase 3, X-linked	Source:HGNC Symbol;Acc:HGNC:2745]	X	-1.74607	7.18917	4.94762	0.000247981	0.00591517	0.588311
ENSOARG00000001008	NPPC	Ovis aries natriuretic peptide C (NPPC), mRNA.	Source:RefSeq mRNA;Acc:NM_001009479]	JH923614.1	2.83747	1.69969	-4.94456	0.000249352	0.00592547	0.726345
ENSOARG00000009888	ZCCHC24	zinc finger, CCHC domain containing 24	Source:HGNC Symbol;Acc:HGNC:26911]	25	1.8652	4.31552	-4.94365	0.000249763	0.00592547	0.664965
ENSOARG00000009460	TMEM161A	transmembrane protein 161A	Source:HGNC Symbol;Acc:HGNC:26020]	5	1.26101	6.25117	-4.94115	0.000250889	0.00594146	0.582037
ENSOARG00000002240	FAF2	Fas associated factor family member 2	Source:HGNC Symbol;Acc:HGNC:24666]	5	-1.17433	7.1649	4.9394	0.000251683	0.00594958	0.573706
ENSOARG00000003602		Uncharacterized protein	Source:UniProtKB/TrEMBL;Acc:W5P095]	14	3.28384	0.247291	-4.93785	0.000252386	0.0059555	0.430487
ENSOARG00000000631	KCNU1	potassium channel, subfamily U, member 1	Source:HGNC Symbol;Acc:HGNC:18867]	26	2.59235	5.10749	-4.93611	0.000253182	0.00595745	0.611735
ENSOARG00000006911		Uncharacterized protein	Source:UniProtKB/TrEMBL;Acc:W5PAE2]	11	2.46431	1.13002	-4.93518	0.000253607	0.00595745	0.650755
ENSOARG00000001903	PITPNB	phosphatidylinositol transfer protein, beta	Source:HGNC Symbol;Acc:HGNC:9002]	17	-1.48288	5.76721	4.9347	0.000253826	0.00595745	0.580858
ENSOARG00000008263	OMD	osteomodulin	Source:HGNC Symbol;Acc:HGNC:8134]	2	4.62937	0.287932	-4.92586	0.000257909	0.00604251	0.403109
ENSOARG00000000227		Uncharacterized protein	Source:UniProtKB/TrEMBL;Acc:W5NPY0]	7	2.47819	2.65341	-4.9234	0.000259058	0.00605209	0.713009
ENSOARG00000000768	PLRG1	pleiotropic regulator 1	Source:HGNC Symbol;Acc:HGNC:9089]	17	-1.50568	4.35118	4.92105	0.000260157	0.00605209	0.620848
ENSOARG00000012528	MDN1	MDN1, midasin homolog (yeast)	Source:HGNC Symbol;Acc:HGNC:18302]	8	-2.23045	2.91154	4.92134	0.000260022	0.00605209	0.702004
ENSOARG00000008585	ASF1A	Ovis aries ASF1 anti-silencing function 1 homolog A (S. cerevisiae) (ASF1A), mRNA.	Source:RefSeq mRNA;Acc:NM_001166188]	8	-4.50866	2.83208	4.922	0.000259714	0.00605209	0.708712
ENSOARG00000012113	UFL1	UFM1-specific ligase 1	Source:HGNC Symbol;Acc:HGNC:23039]	8	-1.44923	4.93285	4.91869	0.000261271	0.00606728	0.585901
ENSOARG00000012748	GPNMB	glycoprotein (transmembrane) nmb	Source:HGNC Symbol;Acc:HGNC:4462]	4	5.68287	-0.193703	-4.91319	0.000263877	0.00607317	0.213369
ENSOARG00000002595	MYO3B	myosin IIIB	Source:HGNC Symbol;Acc:HGNC:15576]	2	2.54486	4.16411	-4.9104	0.000265214	0.00607317	0.61702
ENSOARG00000007111		Uncharacterized protein	Source:UniProtKB/TrEMBL;Acc:W5PB14]	15	2.2196	2.67245	-4.91438	0.000263311	0.00607317	0.698044
ENSOARG00000008565	TPD52L3	tumor protein D52-like 3	Source:HGNC Symbol;Acc:HGNC:23382]	2	-1.46363	6.03168	4.91102	0.000264917	0.00607317	0.531471
ENSOARG00000004659	CNDP2	CNDP dipeptidase 2 (metallopeptidase M20 family)	Source:HGNC Symbol;Acc:HGNC:24437]	23	-1.49785	6.19348	4.91291	0.000264011	0.00607317	0.532304
ENSOARG00000007176	DNAJB12	DnaJ (Hsp40) homolog, subfamily B, member 12	Source:HGNC Symbol;Acc:HGNC:14891]	25	-1.58924	5.64871	4.91285	0.000264041	0.00607317	0.544691
ENSOARG00000007319		Uncharacterized protein	Source:UniProtKB/TrEMBL;Acc:W5PBN4]	21	-1.90478	5.9217	4.91117	0.000264844	0.00607317	0.534497
ENSOARG00000009952	FLVCR1	feline leukemia virus subgroup C cellular receptor 1	Source:HGNC Symbol;Acc:HGNC:24682]	12	-2.38377	3.05794	4.9129	0.000264019	0.00607317	0.681125
ENSOARG00000006450	TFDP2	transcription factor Dp-2 (E2F dimerization partner 2)	Source:HGNC Symbol;Acc:HGNC:11751]	1	6.13569	-0.916757	-4.90435	0.000268129	0.00610805	-0.130873
ENSOARG00000009543	UCKL1	uridine-cytidine kinase 1-like 1	Source:HGNC Symbol;Acc:HGNC:15938]	13	1.57634	5.83537	-4.90457	0.000268023	0.00610805	0.526939
ENSOARG00000001664	ARMCX4	armadillo repeat containing, X-linked 4	Source:HGNC Symbol;Acc:HGNC:28615]	X	1.86672	5.33494	-4.89725	0.000271593	0.00616564	0.530554
ENSOARG00000005163		Uncharacterized protein	Source:UniProtKB/TrEMBL;Acc:W5P534]	14	1.79937	4.14389	-4.89739	0.000271524	0.00616564	0.5933
ENSOARG00000010586		Uncharacterized protein	Source:UniProtKB/TrEMBL;Acc:W5PLN7]	6	2.73583	2.52331	-4.89546	0.000272477	0.00617504	0.668111
ENSOARG00000009359	DCAF12	DDB1 and CUL4 associated factor 12	Source:HGNC Symbol;Acc:HGNC:19911]	2	1.56538	7.81711	-4.89319	0.000273597	0.00618977	0.492729
ENSOARG00000010702	TCTEX1D1	Tctex1 domain containing 1	Source:HGNC Symbol;Acc:HGNC:26882]	1	-1.40162	6.80332	4.88901	0.000275671	0.00621669	0.483624
ENSOARG00000000050		Uncharacterized protein	Source:UniProtKB/TrEMBL;Acc:W5NPD7]	15	-1.59446	4.04347	4.8889	0.000275731	0.00621669	0.582566
ENSOARG00000008000	KCNJ3	potassium channel, inwardly rectifying subfamily J, member 3	Source:HGNC Symbol;Acc:HGNC:6264]	2	5.28609	0.51927	-4.88683	0.000276763	0.00621867	0.414441
ENSOARG00000001776		Uncharacterized protein	Source:UniProtKB/TrEMBL;Acc:W5NUM0]	19	1.43192	4.23875	-4.88512	0.000277623	0.00622737	0.564749
ENSOARG00000002564	CCM2L	cerebral cavernous malformation 2-like	Source:HGNC Symbol;Acc:HGNC:16153]	13	2.75894	3.36789	-4.87792	0.000281267	0.00625	0.609113
ENSOARG00000004664	FBXO38	F-box protein 38	Source:HGNC Symbol;Acc:HGNC:28844]	5	-2.36895	3.75357	4.87758	0.000281438	0.00625	0.582862
ENSOARG00000007327		Uncharacterized protein	Source:UniProtKB/TrEMBL;Acc:W5PBP5]	23	-3.26681	4.33153	4.87986	0.000280278	0.00625	0.55159
ENSOARG00000000588	ACOT4	acyl-CoA thioesterase 4	Source:HGNC Symbol;Acc:HGNC:19748]	7	-3.82127	2.08944	4.8775	0.00028148	0.00625	0.632561
ENSOARG00000001582		Uncharacterized protein	Source:UniProtKB/TrEMBL;Acc:W5NU14]	JH921889.1	5.55424	3.97903	-4.87469	0.000282918	0.0062503	0.577986
ENSOARG00000003343	TTC8	tetratricopeptide repeat domain 8	Source:HGNC Symbol;Acc:HGNC:20087]	7	2.29022	4.34615	-4.87506	0.000282726	0.0062503	0.542366
ENSOARG00000006822	PLXNB3	plexin B3	Source:HGNC Symbol;Acc:HGNC:9105]	X	-1.88933	4.94342	4.87512	0.000282693	0.0062503	0.508004
ENSOARG00000004902	ZC4H2	zinc finger, C4H2 domain containing	Source:HGNC Symbol;Acc:HGNC:24931]	X	2.07674	5.62568	-4.87285	0.00028386	0.00626062	0.476485
ENSOARG00000010769	CHRM4	cholinergic receptor, muscarinic 4	Source:HGNC Symbol;Acc:HGNC:1953]	15	1.72815	6.7063	-4.86378	0.000288568	0.0063538	0.438914
ENSOARG00000000203		Uncharacterized protein	Source:UniProtKB/TrEMBL;Acc:W5NPU3]	14	4.55652	-0.852479	-4.86025	0.000290417	0.00635755	-0.0845081
ENSOARG00000009063	C1QL3	complement component 1, q subcomponent-like 3	Source:HGNC Symbol;Acc:HGNC:19359]	13	2.73442	2.73684	-4.85468	0.000293368	0.00635755	0.594995
ENSOARG00000009962	SMTNL1	smoothelin-like 1	Source:HGNC Symbol;Acc:HGNC:32394]	15	2.33119	2.17881	-4.8534	0.000294049	0.00635755	0.597469
ENSOARG00000008788	KCNT2	potassium channel, sodium activated subfamily T, member 2	Source:HGNC Symbol;Acc:HGNC:18866]	12	-1.05408	6.102	4.85425	0.000293601	0.00635755	0.427808
ENSOARG00000001183		Uncharacterized protein	Source:UniProtKB/TrEMBL;Acc:W5NST4]	4	-1.22871	8.69705	4.86012	0.000290489	0.00635755	0.438
ENSOARG00000000822				7	-1.41901	3.98456	4.86155	0.000289737	0.00635755	0.536951
ENSOARG00000008578	PTCH	Uncharacterized protein	Source:UniProtKB/TrEMBL;Acc:W5PFJ2]	2	-1.43647	5.43386	4.85352	0.000293988	0.00635755	0.446495
ENSOARG00000007078	LHX5	LIM homeobox 5	Source:HGNC Symbol;Acc:HGNC:14216]	17	-1.6681	3.08835	4.85935	0.000290896	0.00635755	0.586043
ENSOARG00000008967	SLAMF7	SLAM family member 7	Source:HGNC Symbol;Acc:HGNC:21394]	1	-1.8724	7.51056	4.85452	0.000293456	0.00635755	0.421392
ENSOARG00000006379	OR51H1	olfactory receptor, family 51, subfamily H, member 1	Source:HGNC Symbol;Acc:HGNC:14833]	15	3.07552	1.04081	-4.8503	0.000295713	0.00638303	0.502392
ENSOARG00000012659	NR1F2	Ovis aries RAR-related orphan receptor B (RORB), mRNA.	Source:RefSeq mRNA;Acc:NM_001129737]	2	1.37891	4.9603	-4.84547	0.000298316	0.00642344	0.454651
ENSOARG00000012658	PBX3	pre-B-cell leukemia homeobox 3	Source:HGNC Symbol;Acc:HGNC:8634]	3	2.31885	2.33021	-4.84181	0.000300305	0.00645043	0.57877
ENSOARG00000003764	AGPAT2	1-acylglycerol-3-phosphate O-acyltransferase 2	Source:HGNC Symbol;Acc:HGNC:325]	3	1.55344	6.32984	-4.83889	0.000301899	0.0064645	0.397337
ENSOARG00000008649	FKBP14	FK506 binding protein 14, 22 kDa	Source:HGNC Symbol;Acc:HGNC:18625]	4	-2.14756	4.01396	4.83792	0.000302433	0.0064645	0.495158
ENSOARG00000001155	HECA	headcase homolog (Drosophila)	Source:HGNC Symbol;Acc:HGNC:21041]	8	-2.71548	3.61481	4.83833	0.000302205	0.0064645	0.522244
ENSOARG00000011648	FOXL1	forkhead box L1	Source:HGNC Symbol;Acc:HGNC:3817]	14	1.9075	3.7214	-4.83301	0.000305143	0.00647204	0.506637
ENSOARG00000005201	METTL1	methyltransferase like 1	Source:HGNC Symbol;Acc:HGNC:7030]	3	1.48167	3.76467	-4.83428	0.000304439	0.00647204	0.50394
ENSOARG00000006631	TPR	translocated promoter region, nuclear basket protein	Source:HGNC Symbol;Acc:HGNC:12017]	12	-1.11318	7.62694	4.83448	0.000304327	0.00647204	0.38563
ENSOARG00000007262		Uncharacterized protein	Source:UniProtKB/TrEMBL;Acc:W5PBG8]	1	-1.84703	5.25378	4.83565	0.000303684	0.00647204	0.421743
ENSOARG00000006860	TRIM42	tripartite motif containing 42	Source:HGNC Symbol;Acc:HGNC:19014]	1	1.4447	5.18961	-4.82413	0.000310106	0.00655404	0.404961
ENSOARG00000003697	SLC35G1	solute carrier family 35, member G1	Source:HGNC Symbol;Acc:HGNC:26607]	22	-2.09212	3.13197	4.82486	0.000309698	0.00655404	0.525848
ENSOARG00000007942	KIAA0226L	KIAA0226-like	Source:HGNC Symbol;Acc:HGNC:20420]	10	1.5	4.09971	-4.8197	0.000312617	0.00656205	0.457646
ENSOARG00000010758	SPAST	spastin	Source:HGNC Symbol;Acc:HGNC:11233]	3	1.3671	5.17938	-4.81854	0.000313278	0.00656205	0.395171
ENSOARG00000008339		Uncharacterized protein	Source:UniProtKB/TrEMBL;Acc:W5PES6]	4	-1.94931	7.47373	4.82194	0.000311344	0.00656205	0.36268
ENSOARG00000005055	HBP1	HMG-box transcription factor 1	Source:HGNC Symbol;Acc:HGNC:23200]	4	-2.16175	2.62723	4.82104	0.000311853	0.00656205	0.538315
ENSOARG00000000380		Uncharacterized protein	Source:UniProtKB/TrEMBL;Acc:W5NQD4]	11	-2.92191	3.37414	4.82024	0.00031231	0.00656205	0.506997
ENSOARG00000008003	MRPS23	mitochondrial ribosomal protein S23	Source:HGNC Symbol;Acc:HGNC:14509]	11	-3.35554	0.711767	4.81662	0.000314371	0.00657035	0.390717
ENSOARG00000000544	ELF3	E74-like factor 3 (ets domain transcription factor, epithelial-specific )	Source:HGNC Symbol;Acc:HGNC:3318]	12	2.4356	2.25556	-4.80216	0.000322759	0.00671369	0.512108
ENSOARG00000006528	LAG3	lymphocyte-activation gene 3	Source:HGNC Symbol;Acc:HGNC:6476]	3	2.34499	5.73569	-4.80289	0.000322326	0.00671369	0.347892
ENSOARG00000012334	PXK	PX domain containing serine/threonine kinase	Source:HGNC Symbol;Acc:HGNC:23326]	19	-1.23573	7.28537	4.79573	0.000326558	0.00678201	0.31433
ENSOARG00000003718	MAPK3	mitogen-activated protein kinase 3	Source:HGNC Symbol;Acc:HGNC:6877]	24	1.50071	4.24254	-4.79451	0.000327283	0.00678636	0.404018
ENSOARG00000002910	ATP5A1	ATP synthase, H+ transporting, mitochondrial F1 complex, alpha subunit 1, cardiac muscle	Source:HGNC Symbol;Acc:HGNC:823]	23	3.94708	-0.877136	-4.78868	0.000330785	0.00679476	-0.170951
ENSOARG00000010093	TRAFD1	TRAF-type zinc finger domain containing 1	Source:HGNC Symbol;Acc:HGNC:24808]	17	2.6984	3.43423	-4.78521	0.000332884	0.00679476	0.444144
ENSOARG00000012532	DNASE1L3	deoxyribonuclease I-like 3	Source:HGNC Symbol;Acc:HGNC:2959]	19	2.48547	6.19023	-4.78751	0.000331489	0.00679476	0.308006
ENSOARG00000002707		Uncharacterized protein	Source:UniProtKB/TrEMBL;Acc:W5NXH2]	X	2.31987	4.18314	-4.79199	0.000328791	0.00679476	0.405102
ENSOARG00000010985	TUSC5	tumor suppressor candidate 5	Source:HGNC Symbol;Acc:HGNC:29592]	11	2.16469	5.56559	-4.78693	0.000331839	0.00679476	0.323168
ENSOARG00000011623	SNTN	sentan, cilia apical structure protein	Source:HGNC Symbol;Acc:HGNC:33706]	19	2.01985	2.35703	-4.78254	0.000334505	0.00679476	0.478631
ENSOARG00000008104	ESD	esterase D	Source:HGNC Symbol;Acc:HGNC:3465]	10	1.94333	3.02967	-4.78038	0.000335825	0.00679476	0.453706
ENSOARG00000003306	DHRS7C	dehydrogenase/reductase (SDR family) member 7C	Source:HGNC Symbol;Acc:HGNC:32423]	11	1.56141	3.77226	-4.79175	0.000328939	0.00679476	0.428754
ENSOARG00000010133	RECQL5	RecQ protein-like 5	Source:HGNC Symbol;Acc:HGNC:9950]	11	1.39307	8.72126	-4.78129	0.000335269	0.00679476	0.295437
ENSOARG00000007213	ZNF462	zinc finger protein 462	Source:HGNC Symbol;Acc:HGNC:21684]	2	-1.16615	6.67248	4.78187	0.000334914	0.00679476	0.290341
ENSOARG00000011974	PPP1R18	protein phosphatase 1, regulatory subunit 18	Source:HGNC Symbol;Acc:HGNC:29413]	20	-1.18829	7.67783	4.78245	0.000334559	0.00679476	0.291748
ENSOARG00000010206	MCTP2	multiple C2 domains, transmembrane 2	Source:HGNC Symbol;Acc:HGNC:25636]	18	-1.41259	7.53015	4.78978	0.000330119	0.00679476	0.304337
ENSOARG00000007025	PRSS42	protease, serine, 42	Source:HGNC Symbol;Acc:HGNC:30716]	19	-1.56753	5.36779	4.78508	0.000332957	0.00679476	0.326107
ENSOARG00000010319	RASGRP3	RAS guanyl releasing protein 3 (calcium and DAG-regulated)	Source:HGNC Symbol;Acc:HGNC:14545]	3	-2.12988	3.50126	4.7807	0.000335629	0.00679476	0.425995
ENSOARG00000005078	PHF10	PHD finger protein 10	Source:HGNC Symbol;Acc:HGNC:18250]	8	-2.51217	7.70094	4.77837	0.000337061	0.00679906	0.284695
ENSOARG00000007738	TAP1	transporter 1, ATP-binding cassette, sub-family B (MDR/TAP)	Source:HGNC Symbol;Acc:HGNC:43]	20	2.94142	2.49156	-4.77281	0.000340498	0.00682395	0.46093
ENSOARG00000001256	TXNDC2	thioredoxin domain containing 2 (spermatozoa)	Source:HGNC Symbol;Acc:HGNC:16470]	23	1.43896	4.7167	-4.77428	0.000339583	0.00682395	0.339773
ENSOARG00000002098	ARL10	ADP-ribosylation factor-like 10	Source:HGNC Symbol;Acc:HGNC:22042]	5	-1.10242	8.01467	4.77307	0.000340335	0.00682395	0.276611
ENSOARG00000006345	SLC31A1	solute carrier family 31 (copper transporter), member 1	Source:HGNC Symbol;Acc:HGNC:11016]	2	-1.54392	4.86502	4.77508	0.000339091	0.00682395	0.331792
ENSOARG00000007715	KDM1A	lysine (K)-specific demethylase 1A	Source:HGNC Symbol;Acc:HGNC:29079]	2	1.84267	5.77176	-4.76984	0.000342349	0.00685063	0.286344
ENSOARG00000011429	BLOC1S3	biogenesis of lysosomal organelles complex-1, subunit 3	Source:HGNC Symbol;Acc:HGNC:20914]	14	3.9893	1.77659	-4.7679	0.000343564	0.0068645	0.436718
ENSOARG00000004600	EEFSEC	eukaryotic elongation factor, selenocysteine-tRNA-specific	Source:HGNC Symbol;Acc:HGNC:24614]	19	-1.77311	5.81699	4.76595	0.000344786	0.00686807	0.275973
ENSOARG00000009591	DEDD	death effector domain containing	Source:HGNC Symbol;Acc:HGNC:2755]	1	2.82293	4.87749	-4.75819	0.000349706	0.006949	0.30813
ENSOARG00000003477	FRA10AC1	fragile site, folic acid type, rare, fra(10)(q23.3) or fra(10)(q24.2) candidate 1	Source:HGNC Symbol;Acc:HGNC:1162]	22	1.91974	3.23659	-4.75788	0.000349904	0.006949	0.403398
ENSOARG00000003592	LRP2	low density lipoprotein receptor-related protein 2	Source:HGNC Symbol;Acc:HGNC:6694]	2	3.23191	1.88799	-4.75409	0.000352335	0.00698105	0.422064
ENSOARG00000007827	DHX29	DEAH (Asp-Glu-Ala-His) box polypeptide 29	Source:HGNC Symbol;Acc:HGNC:15815]	16	1.85087	4.82767	-4.75371	0.000352578	0.00698105	0.298056
ENSOARG00000002033	NADK	NAD kinase	Source:HGNC Symbol;Acc:HGNC:29831]	12	-1.41173	5.95719	4.75098	0.000354346	0.006995	0.244149
ENSOARG00000011127	KIF13A	kinesin family member 13A	Source:HGNC Symbol;Acc:HGNC:14566]	20	-1.18157	8.03056	4.74991	0.000355038	0.00699817	0.234633
ENSOARG00000012620	THG1L	tRNA-histidine guanylyltransferase 1-like (S. cerevisiae)	Source:HGNC Symbol;Acc:HGNC:26053]	5	-1.74605	5.62849	4.74545	0.000357942	0.00704488	0.244388
ENSOARG00000002064		Uncharacterized protein	Source:UniProtKB/TrEMBL;Acc:W5NVH1]	JH922460.1	-5.95029	-0.639112	4.74365	0.000359126	0.00704591	-0.202619
ENSOARG00000004171		Uncharacterized protein	Source:UniProtKB/TrEMBL;Acc:W5P208]	11	3.64281	3.06457	-4.74099	0.000360878	0.00706045	0.388839
ENSOARG00000001154	EML1	echinoderm microtubule associated protein like 1	Source:HGNC Symbol;Acc:HGNC:3330]	18	1.60676	7.2339	-4.74006	0.000361492	0.00706198	0.213577
ENSOARG00000005268	G2E3	G2/M-phase specific E3 ubiquitin protein ligase	Source:HGNC Symbol;Acc:HGNC:20338]	18	-4.13298	-0.231906	4.73893	0.00036224	0.00706609	0.0247915
ENSOARG00000004985	HNRNPU	heterogeneous nuclear ribonucleoprotein U (scaffold attachment factor A)	Source:HGNC Symbol;Acc:HGNC:5048]	12	1.21073	7.26666	-4.73625	0.000364017	0.00709025	0.206482
ENSOARG00000011155	SERINC4	serine incorporator 4	Source:HGNC Symbol;Acc:HGNC:32237]	18	1.25302	6.49246	-4.73054	0.000367838	0.0071541	0.198757
ENSOARG00000010377	ARL5C	Ovis aries ADP-ribosylation factor-like 5C (ARL5C), mRNA.	Source:RefSeq mRNA;Acc:NM_001162556]	11	-1.61748	4.6556	4.72376	0.000372433	0.00721151	0.251481
ENSOARG00000002195	RNMT	RNA (guanine-7-) methyltransferase	Source:HGNC Symbol;Acc:HGNC:10075]	23	-1.67224	4.98399	4.71917	0.000375575	0.00726166	0.229968
ENSOARG00000002679	PPP1R9A	protein phosphatase 1, regulatory subunit 9A	Source:HGNC Symbol;Acc:HGNC:14946]	4	1.38615	4.82969	-4.71825	0.000376211	0.0072633	0.232455
ENSOARG00000003986	ITPA	inosine triphosphatase (nucleoside triphosphate pyrophosphatase)	Source:HGNC Symbol;Acc:HGNC:6176]	13	3.01269	2.94709	-4.71209	0.000380483	0.00728396	0.341525
ENSOARG00000008739	DCBLD1	discoidin, CUB and LCCL domain containing 1	Source:HGNC Symbol;Acc:HGNC:21479]	8	2.57424	2.64394	-4.71033	0.000381707	0.00728396	0.349761
ENSOARG00000003142	USH1C	Usher syndrome 1C (autosomal recessive, severe)	Source:HGNC Symbol;Acc:HGNC:12597]	15	-1.17537	5.81163	4.71175	0.000380718	0.00728396	0.176302
ENSOARG00000003335	PDE6C	phosphodiesterase 6C, cGMP-specific, cone, alpha prime	Source:HGNC Symbol;Acc:HGNC:8787]	22	-1.42385	8.30462	4.71279	0.000379992	0.00728396	0.168827
ENSOARG00000010002	ADAMDEC1	ADAM-like, decysin 1	Source:HGNC Symbol;Acc:HGNC:16299]	2	-1.62922	2.92985	4.71456	0.000378764	0.00728396	0.342315
[truncated: 1,783 more rows]
