# Supplementary material for: Transcriptomic Study on Ovine Immune Responses to Fasciola hepatica Infection
Source: PLoS Negl Trop Dis. 2016 Sep 23;10(9):e0005015. doi: 10.1371/journal.pntd.0005015 (PMC5035020; doi:10.1371/journal.pntd.0005015)
Supplement: S6 Table — (XLSX) [file pntd.0005015.s006.xlsx]

## Sheet: T2vsT1
Ingenuity Canonical Pathways in T2vsT1, ranked by -log(p-value), (FDR-adjusted p-value < 0.05)
Pathway Name	-log(p-value)	Ratio	z-score	Molecules
Production of Nitric Oxide and Reactive Oxygen Species in Macrophages	5.82E00	3.33E-01	-1.291	MAP2K4,PPARA,MAP3K15,MAP3K11,MAPK1,PPP2R3B,MAPK13,PIK3R4,PPP1R14B,IKBKB,RHOG,RHOB,MAPK3,PIK3CG,MAP3K7,NFKBIB,MAP3K2,PPP1R14C,APOM,MAP3K13,PPP1R11,IFNGR1,NCF4,MAPK12,RAP1A,NCF1,PPP2R3A,PPP2R4,PLCG2,PIK3R6,IRF8,TNF,SIRPA,FNBP1,APOE,PPP1R3C,RHOT2,PIK3R5,JAK2,RHOH,PRKCZ,LYZ,NFKBIA,PPP1R10,RHOT1,RHOD,AKT3,SERPINA1,NOS2,TNFRSF1B,MAP2K1,IL4,PRKCA,IFNG,TNFRSF1A,MAP3K1,PRKCG,MAP3K8,PPP2R5E,PPP2R1B,CLU,PRK…
Germ Cell-Sertoli Cell Junction Signaling	5.78E00	3.44E-01	NaN	MAP2K4,MAP3K15,MAP3K11,TGFBR1,MAPK1,AXIN1,KRAS,LIMK2,PIK3R4,PTK2,RHOG,RHOB,MAPK3,KEAP1,PIK3CG,MAP3K7,TUBA1C,JUP,MAP3K2,TUBB3,RRAS,MAP3K13,MAPK12,RAC3,CDH2,PIK3R6,MAP2K3,ACTN4,ACTG1,TNF,FNBP1,MAP2K6,RHOT2,ILK,PIK3R5,CTNNA1,IQGAP1,RHOH,RHOT1,RHOD,TUBB4A,MAP2K1,RAB8B,SRC,EPN1,TNFRSF1A,ACTN2,ACTB,MAP3K1,ITGA2,TUBA4A,TUBB6,FER,MAP3K8,A2M,CTNND1
IL-6 Signaling	5.55E00	3.71E-01	-1.982	MAP2K4,MAP2K6,IL6ST,IL1A,MAPK1,PIK3R5,KRAS,MAPK13,JAK2,IL6,PIK3R4,VEGFA,IL1R2,IKBKB,NFKBIA,MAPK3,PIK3CG,SOS1,MAP3K7,AKT3,CSNK2B,NFKBIB,TNFRSF1B,MAPKAPK2,IL1RAP,MAP2K1,TAB1,MCL1,ABCB1,CXCL8,RRAS,TNFRSF1A,MAPK12,IL18RAP,COL1A1,TRAF2,IL18,IL1RN,PIK3R6,MAP2K3,TNF,A2M,HSPB1
phagosome formation	5.28E00	3.69E-01	NaN	FCAR,MRC1,FCGR2C,FN1,MSR1,PLA2R1,RHOT2,PIK3R5,FCGR2B,PIK3R4,FCGR1A,RHOH,PRKCZ,PLCD3,TLR10,RHOG,RHOB,RHOD,RHOT1,PIK3CG,TLR1,TLR7,PLCL1,PLCD4,FCGR3A/FCGR3B,FCGR1B,FCER2,PRKCA,FCGR2A,MRC2,ITGA2,PLCL2,TLR9,PRKCG,MARCKS,TLR5,PLCG2,TLR6,PIK3R6,FNBP1,PRKCB
Role of IL-17A in Arthritis	5.09E00	4.46E-01	NaN	MAP2K4,MAP2K6,CXCL8,MAPK1,PIK3R5,CCL20,IL17RC,CXCL5,MAPK13,MAPK12,PIK3R4,CXCL6,CXCL3,NFKBIA,CCL2,MAPK3,PIK3CG,PIK3R6,MAP2K3,CXCL1,RPS6KA1,NOS2,NFKBIB,MAPKAPK2,MAP2K1
Xenobiotic Metabolism Signaling	5.03E00	2.96E-01	NaN	MAP2K4,NDST3,MAP3K15,MAP3K11,MAPK1,PPP2R3B,KRAS,IL6,MAPK13,PIK3R4,CHST15,ARNT,SULT1A2,CHST2,CYP1A2,CAMK2D,PIK3CG,ALDH3A2,KEAP1,MAPK3,SULT1A3/SULT1A4,MAP3K7,ALDH6A1,MAP3K2,MGST1,HDAC4,RRAS,MAP3K13,MAPK12,ALDH9A1,SULT4A1,SMOX,PPP2R3A,PPP2R4,PIK3R6,MAP2K3,ALDH3B1,RXRA,NDST1,TNF,GSTP1,MAP2K6,GAL3ST2,IL1A,SULT1C4,CHST7,NQO2,ABCC2,HS2ST1,PIK3R5,FMO5,PRKCZ,HMOX1,CES1,UST,CHST3,GSTM4,NOS2,MAP2K1,CITED2,P…
Role of Macrophages, Fibroblasts and Endothelial Cells in Rheumatoid Arthritis	5.01E00	2.89E-01	NaN	MAP2K4,MAPK1,AXIN1,IL17RC,KRAS,IL6,PIK3R4,FCGR1A,VEGFA,IL1R2,IKBKB,PLCD3,TLR10,TRAF3IP2,CAMK2D,PIK3CG,MAPK3,TRAF4,TLR1,MAP3K7,TRAF5,NFKBIB,PLCL1,IL1RAP,TNFSF13B,CXCL8,RRAS,CREB3,PLCL2,TLR9,APC,IL18,IL1RN,PLCG2,PIK3R6,MAP2K3,TNF,IL6ST,MAP2K6,IL1A,FN1,PDGFA,LRP6,CEBPD,PIK3R5,JAK2,NFATC1,PRKCZ,IRAK1,NFAT5,NLK,NFKBIA,F2RL1,CCL2,TLR7,CEBPA,AKT3,MAPKAPK2,TNFRSF1B,NOS2,MAP2K1,PLCD4,FCGR3A/FCGR3B,PRKCA,S…
Death Receptor Signaling	4.93E00	3.8E-01	1.521	MAP2K4,PARP2,DFFA,BCL2,DIABLO,IKBKB,NFKBIA,TIPARP,TNFSF12,TNFSF15,CASP8,TNFRSF1B,NFKBIB,TNFRSF10A,BIRC3,PARP14,TNFRSF21,NAIP,TNFRSF1A,ACTB,TNFRSF10B,ZC3HAV1,PARP8,TBK1,PARP3,DAXX,TRAF2,TNFRSF25,DFFB,CYCS,SPTAN1,CFLAR,TNF,ACTG1,HSPB1
TREM1 Signaling	4.67E00	3.95E-01	-2.921	TREM1,MAPK1,JAK2,IL6,FCGR2B,CCL3,IRAK1,CXCL3,TLR10,CCL2,MAPK3,TLR1,TLR7,AKT3,NLRP2,CXCL8,IL10,NLRP5,TLR9,NOD2,IL18,CD40,TLR5,NLRP12,PLCG2,TLR6,CSF2,TNF,CASP5,ITGAX
Toll-like Receptor Signaling	4.47E00	3.92E-01	-1.091	MAP2K6,MAP2K4,PPARA,IL1A,MAPK1,TNFAIP3,MAPK13,IRAK1,IKBKB,TLR10,NFKBIA,TRAF4,TLR1,MAP3K7,TLR7,TAB1,MAP3K1,MAPK12,TLR9,UBD,LY96,IL18,TLR5,IL1RN,TLR6,MAP2K3,UBC,TNF,IRAK4
IL-17 Signaling	4.27E00	3.89E-01	NaN	MAP2K6,MAP2K4,MAPK1,PIK3R5,IL17RC,KRAS,IL6,JAK2,MAPK13,CXCL5,PIK3R4,CXCL10,TRAF3IP2,CCL2,PIK3CG,MAPK3,MAP3K7,AKT3,CXCL1,IL17F,MAPKAPK2,NOS2,MAP2K1,CXCL8,RRAS,MAPK12,PIK3R6,MAP2K3
NF-κB Signaling	4.26E00	3.12E-01	-0.544	TGFBR1,KRAS,PIK3R4,FGFR3,IL1R2,IKBKB,TLR10,LCK,PIK3CG,TLR1,MAP3K7,TRAF5,NFKBIB,TNFSF13B,TAB1,RRAS,FGFR2,TBK1,MALT1,TLR9,IL18,CD40,CARD11,IL1RN,PLCG2,PIK3R6,TNF,MAP2K6,IL1A,PIK3R5,BMPR2,TNFAIP3,PRKCZ,IRAK1,NFKBIA,PDGFRA,TLR7,AKT3,CSNK2B,CASP8,TNFRSF1B,TNFSF11,TNFRSF1A,HDAC1,MAP3K1,GH1,TNFRSF11A,TRAF2,TLR5,TLR6,TGFA,MAP3K8,IRAK4,PRKCB
NF-κB Activation by Viruses	4.02E00	3.78E-01	-2.117	CCR5,MAPK1,PIK3R5,KRAS,PIK3R4,PRKCZ,ITGB3,IKBKB,LCK,NFKBIA,MAPK3,PIK3CG,ITGAV,AKT3,NFKBIB,ITGB5,PRKCA,RRAS,ITGA2,MAP3K1,TBP,PRKCG,ITGB2,TRAF2,PIK3R6,IKBKAP,ITGA1,PRKCB
Role of Tissue Factor in Cancer	4.01E00	3.39E-01	NaN	MAPK1,PIK3R5,RPS6KA3,KRAS,LIMK2,MAPK13,JAK2,PIK3R4,ITGB3,VEGFA,YES1,LCK,GNA15,F2RL1,MAPK3,PIK3CG,ITGAV,HCK,AKT3,CXCL1,GNA13,RPS6KA2,FGR,ITGB5,PRKCA,SRC,CXCL8,RRAS,GNA12,PLAUR,HBEGF,MAPK12,F3,CSF1,PIK3R6,RPS6KA4,RPS6KA1,CSF2
RANK Signaling in Osteoclasts	4.01E00	3.6E-01	NaN	MAP2K6,MAP2K4,MAP3K15,MAP3K11,MAPK1,PIK3R5,MAPK13,PIK3R4,NFATC1,IKBKB,NFKBIA,PIK3CG,MAPK3,MAP3K7,AKT3,TRAF5,NFKBIB,MAP2K1,BIRC3,MAP3K2,SRC,TNFSF11,MITF,MAP3K13,MAP3K1,TNFRSF11A,MAPK12,CALM1 (includes others),TRAF2,CBL,PIK3R6,MAP3K8
IL-15 Signaling	3.99E00	3.88E-01	NaN	IL15RA,MAPK1,PIK3R5,KRAS,JAK2,MAPK13,IL6,PIK3R4,BCL2,PTK2,LCK,PIK3CG,MAPK3,AKT3,MAP2K1,IL4,CXCL8,RRAS,IL15,MAPK12,AXL,RAC3,TRAF2,PIK3R6,CSF2,TNF
B Cell Receptor Signaling	3.97E00	3.04E-01	NaN	MAP2K4,MAP3K15,FCGR2C,MAP3K11,MAPK1,KRAS,MAPK13,PIK3R4,PTK2,IKBKB,CAMK2D,MAPK3,PIK3CG,MAP3K7,NFKBIB,MAP3K2,ETS1,CD19,RRAS,MAP3K13,CREB3,CD79A,MALT1,MAPK12,RAP1A,GAB1,PLCG2,PIK3R6,VAV1,MAP2K3,BCL2A1,MAP2K6,POU2F2,PIK3R5,FCGR2B,OCRL,NFATC1,NFAT5,NFKBIA,INPP5B,SOS1,AKT3,RASSF5,MAP2K1,APBB1IP,FCGR2A,MAP3K1,BTK,CALM1 (includes others),FOXO1,DAPP1,PAG1,MEF2C,MAP3K8,PRKCB
LPS/IL-1 Mediated Inhibition of RXR Function	3.91E00	2.9E-01	-0.2	MAP2K4,PPARA,NDST3,CPT1B,ABCG1,CHST15,SULT1A2,ABCB9,CHST2,IL1R2,RARA,ALDH3A2,SULT1A3/SULT1A4,MAP3K7,XPO1,FABP7,IL1RAP,ALDH6A1,ACSL3,MGST1,CPT1A,NR1H3,ALDH9A1,IL18,SULT4A1,SMOX,IL1RN,CPT2,ALDH3B1,PLTP,RXRA,NDST1,TNF,GSTP1,GAL3ST2,APOE,IL1A,SULT1C4,CHST7,ABCC2,HS2ST1,FMO5,IRAK1,SLC27A5,UST,CHST3,GSTM4,FABP5,CPT1C,FABP3,TNFRSF1B,ABCB1,TNFRSF1A,MGMT,MAP3K1,GSTO1,IL18RAP,CHST1,LY96,TRAF2,SREBF1,SULT1A…
Aldosterone Signaling in Epithelial Cells	3.85E00	3.09E-01	NaN	MAPK1,DNAJB4,SGK1,HSPA1A/HSPA1B,PIKFYVE,KRAS,PIP5K1B,HSPA5,PIK3R4,SLC9A1,PLCD3,HSPA4,DNAJC28,SACS,MAPK3,PIK3CG,PLCL1,ITPR2,DNAJC25,PLCL2,PLCG2,ITPR3,PIK3R6,HSPA13,DNAJB7,HSPB11,HSPB1,HSPA6,PIK3R5,HSPB8,DNAJC10,DNAJA1,HSPA1L,PRKCZ,DNAJB13,SOS1,MAP2K1,PLCD4,PRKCA,HSPA4L,NEDD4,SLC12A2,HSPH1,DNAJC1,DNAJB9,PRKCG,HSPA12A,DNAJC11,DNAJB5,PRKCB
IL-10 Signaling	3.82E00	3.75E-01	NaN	MAP2K6,MAP2K4,FCGR2C,CCR5,IL1A,MAPK1,IL6,MAPK13,FCGR2B,IL1R2,HMOX1,IKBKB,NFKBIA,SP1,MAP3K7,NFKBIB,IL1RAP,TAB1,FCGR2A,IL10,MAPK12,IL18RAP,IL18,IL1RN,IL10RA,MAP2K3,TNF
HIPPO signaling	3.82E00	3.56E-01	-1.091	PPP1R3C,WWTR1,PPP2R3B,LATS2,PPP1R14B,PRKCZ,CSNK1E,STK4,PPP1R10,LLGL1,SMAD4,TEAD2,AMOT,LATS1,RASSF1,PPP1R14C,TJP2,YWHAG,YWHAZ,PPP1R11,STK3,SKP2,ITCH,DLG5,PPP2R4,PPP2R3A,SCRIB,TEAD3,PPP2R5E,SFN,PPP2R1B
TGF-β Signaling	3.82E00	3.56E-01	0.853	MAP2K6,MAP2K4,TGFBR1,MAPK1,SKI,BMPR2,KRAS,MAPK13,BCL2,RUNX2,MAPK3,SOS1,MAP3K7,SMAD4,MAP4K1,VDR,SERPINE1,MAP2K1,TAB1,RUNX3,RRAS,HDAC1,SMAD7,ACVR1,MAPK12,ACVR1B,IRF7,AMH,MAP2K3,SMURF2,PMEPA1
IL-8 Signaling	3.78E00	2.98E-01	-1.664	MAP2K4,MAPK1,KRAS,LIMK2,CXCR1,PIK3R4,ITGB3,PTK2,VEGFA,RAB11FIP2,IKBKB,RHOG,RHOB,MAPK3,PIK3CG,ITGAV,CXCL1,GNA13,NFKBIB,GNG12,ITGB5,CXCL8,RRAS,HBEGF,MMP2,MAPK12,RAC3,PLD1,PIK3R6,FNBP1,RHOT2,PIK3R5,IQGAP1,RHOH,PRKCZ,GNG7,EIF4EBP1,BCL2,IRAK1,HMOX1,CXCR2,RHOT1,RHOD,AKT3,MAP2K1,PRKCA,GNG4,SRC,GNA12,CSTB,PRKCG,ITGB2,MMP9,IRAK4,PRKCB,ITGAX
Role of IL-17F in Allergic Inflammatory Airway Diseases	3.78E00	4.32E-01	NaN	CXCL8,MAPK1,CREB3,RPS6KA3,IL17RC,IL6,CXCL5,CXCL6,CXCL10,TRAF3IP2,CCL2,MAPK3,RPS6KA4,CXCL1,RPS6KA2,RPS6KA1,CSF2,IL17F,MAP2K1
IL-17A Signaling in Airway Cells	3.66E00	3.79E-01	NaN	MAP2K4,MAPK1,PIK3R5,IL17RC,CCL20,IL6,JAK2,MAPK13,CXCL5,PIK3R4,CXCL3,IKBKB,TRAF3IP2,NFKBIA,PIK3CG,MAPK3,MAP3K7,AKT3,MUC5AC,CXCL1,NFKBIB,MAP2K1,MAPK12,CXCL6,PIK3R6
Role of Osteoblasts, Osteoclasts and Chondrocytes in Rheumatoid Arthritis	3.59E00	2.84E-01	NaN	MAP2K4,MAPK1,AXIN1,ACP5,IL6,PIK3R4,ITGB3,IL1R2,IKBKB,RUNX2,PIK3CG,MAPK3,MAP3K7,TRAF5,NFKBIB,IL1RAP,BIRC3,SPP1,MAPK12,APC,IL18,CBL,IL1RN,PIK3R6,MAP2K3,TNF,MAP2K6,ADAM17,IL1A,MMP14,LRP6,PIK3R5,BMPR2,NFATC1,BCL2,NFKBIA,NFAT5,AKT3,SMAD4,TNFRSF1B,ALPL,IL4,NAIP,IFNG,SRC,TNFSF11,CTSK,IL10,TNFRSF1A,ITGA2,DVL1,TNFRSF11A,CSF1R,IL18RAP,COL1A1,CALM1 (includes others),TRAF2,WNT10A,FOXO1,CSF1,APC2,CSF2,LRP1,TC…
Integrin Signaling	3.49E00	2.89E-01	-1.941	MAP2K4,MAP3K11,ARHGAP26,MAPK1,ARF1,KRAS,PIK3R4,ITGB3,PTK2,PARVB,PPP1R12B,RHOG,RHOB,MAPK3,PIK3CG,ARF4,GRB7,ITGAV,TSPAN4,ITGB5,RRAS,RALB,TSPAN2,RAC3,RAP1A,TLN2,ARPC1A,CAPN1,PLCG2,PIK3R6,ITGA1,ACTN4,TSPAN6,ACTG1,FNBP1,RALA,TSPAN7,ARHGEF7,RHOT2,PIK3R5,ILK,ITGB8,RHOH,ITGB7,RHOD,RHOT1,SOS1,AKT3,MAP2K1,SRC,ARPC5L,ACTB,ACTN2,ITGA2,ITGB2,WIPF1,NEDD9,ITGAX
Molecular Mechanisms of Cancer	3.49E00	2.6E-01	NaN	MAP2K4,TGFBR1,MAPK1,AXIN1,ADCY4,CDKN2C,KRAS,MAPK13,PIK3R4,RBL1,PTK2,RB1,CAMK2D,RHOG,RHOB,GNA15,SUFU,MAPK3,PIK3CG,MAP3K7,GNA13,BRCA1,HIPK2,NFKBIB,BIRC3,TAB1,RALGDS,STK36,TFDP1,RRAS,RALB,CDK6,RAPGEF3,MAPK12,RAC3,RAP1A,APC,DAXX,CBL,GAB1,E2F1,PIK3R6,APH1B,ARHGEF18,MAP2K3,CFLAR,NOTCH1,FNBP1,MAP2K6,RALA,PA2G4,PSENEN,ARHGEF7,RHOT2,LRP6,PIK3R5,CTNNA1,BMPR2,HIF1A,JAK2,E2F3,RHOH,PRKCZ,BCL2,DIABLO,SYNGAP1,N…
Cholecystokinin/Gastrin-mediated Signaling	3.48E00	3.3E-01	0.845	MAP2K6,MAP2K4,IL1A,MAPK1,RHOT2,KRAS,RHOH,PRKCZ,PTK2,RHOG,RHOB,RHOD,RHOT1,MAPK3,SOS1,GNA13,MAP2K1,PRKCA,SRC,RRAS,ITPR2,GNA12,MAPK12,GH1,PRKCG,IL18,IL1RN,MEF2D,CREM,ITPR3,MEF2C,MAP2K3,TNF,FNBP1,PRKCB
PKCθ Signaling in T Lymphocytes	3.48E00	3.2E-01	1.342	MAP2K4,CD247,MAP3K15,MAP3K11,MAPK1,PIK3R5,HLA-DQA1,KRAS,HLA-DQB1,PIK3R4,NFATC1,CD28,IKBKB,LCK,NFKBIA,CAMK2D,NFAT5,HLA-DMA,MAPK3,PIK3CG,HLA-DRA,SOS1,MAP3K7,NFKBIB,MAP3K2,RRAS,MAP3K13,MAP3K1,MALT1,CD3D,RAC3,CD3G,GRAP2,CARD11,PLCG2,PIK3R6,HLA-DOB,MAP3K8,VAV1
ERK5 Signaling	3.46E00	3.75E-01	-0.894	IL6ST,SRC,LIF,YWHAG,SGK1,RRAS,GNA12,CREB3,RPS6KA3,YWHAZ,KRAS,PRKCZ,GAB1,MEF2D,MEF2C,MAP3K8,RPS6KA4,FOSL1,RPS6KA2,GNA13,RPS6KA1,SFN,ELK4,MAP3K2
Reelin Signaling in Neurons	3.46E00	3.54E-01	NaN	PAFAH1B2,MAP2K4,APOE,MAP3K11,PIK3R5,PIK3R4,CDK5R1,ITGB3,YES1,LCK,CDK5,CNR2,PIK3CG,HCK,MAP4K1,FGR,SRC,ITGA2,MAPK12,MAPK8IP3,VLDLR,MAPK8IP1,APP,ITGB2,APBB1,NDEL1,PIK3R6,ITGA1
SAPK/JNK Signaling	3.41E00	3.37E-01	-1.095	MAP2K4,DUSP8,MAP3K11,PIK3R5,KRAS,PIK3R4,NFATC1,GNG7,LCK,GADD45A,PIK3CG,SOS1,MAP3K7,MAP4K1,GNA13,TAB1,MAP3K2,RRAS,GNA12,MAP3K13,MAP3K1,MAPK12,MAPK8IP3,MAPK8IP1,RAC3,MAP4K3,DAXX,TRAF2,GAB1,ZAK,PIK3R6,DUSP4
Role of NFAT in Regulation of the Immune Response	3.39E00	2.94E-01	-2	CD247,FCGR2C,CSNK1G1,MAPK1,KRAS,HLA-DQB1,PIK3R4,FCGR1A,CD28,IKBKB,LCK,GNA15,MAPK3,PIK3CG,XPO1,GNA13,NFKBIB,GNG12,ITPR2,RRAS,CD79A,CD3G,PLCG2,ITPR3,PIK3R6,HLA-DQA1,PIK3R5,FCGR2B,GNG7,NFATC1,CSNK1E,NFAT5,NFKBIA,HLA-DMA,HLA-DRA,SOS1,AKT3,MAP2K1,FCGR3A/FCGR3B,FCGR1B,GNG4,AKAP5,FCGR2A,GNA12,CSNK1G3,CD3D,BTK,CALM1 (includes others),MEF2D,HLA-DOB,MEF2C,IKBKAP
Altered T Cell and B Cell Signaling in Rheumatoid Arthritis	3.33E00	3.41E-01	NaN	IL1A,SLAMF1,HLA-DQA1,HLA-DQB1,IL6,CD28,TLR10,HLA-DMA,TLR1,HLA-DRA,TLR7,TNFSF13B,IL4,IFNG,TNFSF11,SPP1,IL10,IL15,CD79A,TLR9,TNFRSF13C,IL18,TLR5,CD40,IL1RN,CSF1,TLR6,HLA-DOB,CSF2,TNF
HMGB1 Signaling	3.32E00	3.17E-01	-1.808	MAP2K4,MAP2K6,IL1A,LIF,MAPK1,RHOT2,PIK3R5,KRAS,MAPK13,IL6,PIK3R4,RHOH,RHOG,RHOB,SP1,CCL2,RHOD,RHOT1,MAPK3,PIK3CG,AKT3,IL17F,TNFRSF1B,SERPINE1,MAP2K1,IL4,CXCL8,IFNG,RRAS,TNFRSF1A,IFNGR1,MAPK12,IL18,PIK3R6,MAP2K3,CSF2,TNF,FNBP1
Glioma Invasiveness Signaling	3.3E00	3.79E-01	-2.132	MAPK1,RRAS,RHOT2,PIK3R5,PLAUR,MMP2,KRAS,PIK3R4,RHOH,ITGB3,PTK2,RHOG,RHOB,RHOD,RHOT1,PIK3CG,MAPK3,ITGAV,PIK3R6,MMP9,ITGB5,FNBP1
Dendritic Cell Maturation	3.27E00	2.91E-01	NaN	MAP2K4,FCGR2C,MAPK1,HLA-DQB1,MAPK13,IL6,PIK3R4,FCGR1A,IKBKB,PLCD3,CD1D,MAPK3,PIK3CG,PLCL1,NFKBIB,COL11A2,TAB1,CREB3,PLCL2,TLR9,MAPK12,IL18,CD40,IL1RN,PLCG2,FSCN1,PIK3R6,IRF8,TNF,COL3A1,IL1A,HLA-DQA1,PIK3R5,JAK2,FCGR2B,NFKBIA,HLA-DMA,CD1A,HLA-DRA,AKT3,TNFRSF1B,PLCD4,FCGR3A/FCGR3B,FCGR1B,IL10,FCGR2A,TNFRSF1A,IL15,COL1A1,COL5A3,HLA-DOB,CSF2
p70S6K Signaling	3.25E00	3.12E-01	0	F2RL2,MAPK1,PIK3R5,PPP2R3B,KRAS,PIK3R4,PRKCZ,PLCD3,F2RL1,PIK3CG,MAPK3,SOS1,AKT3,EEF2K,PLCL1,PLCD4,MAP2K1,PRKCA,IL4,SRC,CD19,YWHAG,EEF2,RRAS,YWHAZ,CD79A,PLCL2,PLD1,PRKCG,BTK,RPS6,PPP2R4,PPP2R3A,PLCG2,PIK3R6,PPP2R5E,SFN,PPP2R1B,PRKCB
Mitotic Roles of Polo-Like Kinase	3.24E00	3.64E-01	NaN	SMC3,CDC20,PLK3,PTTG1,PRC1,CCNB3,CDC7,PPP2R3B,CDC23,ANAPC7,CDK1,SMC1A,SLK,PLK4,PPP2R4,PPP2R3A,CAPN1,ANAPC5,PKMYT1,PPP2R5E,CDC16,CDC26,PPP2R1B,CHEK2
Protein Ubiquitination Pathway	3.17E00	2.7E-01	NaN	USP45,DNAJB4,HSPA1A/HSPA1B,FBXW7,HSPA5,DNAJC28,USP7,PAN2,HSPA4,SACS,UCHL5,SUGT1,BRCA1,BIRC3,USP28,USP38,USP36,DNAJC25,UBE2S,SKP2,UBD,USP31,CBL,UBE2H,UBR1,ANAPC5,HSPB11,DNAJB7,HSPA13,SMURF2,PSMD1,PSMD4,TAP2,UBE2J2,HSPB1,UBE2C,USP21,USP12,CDC20,USP35,HSPA6,HSPB8,USP54,DNAJC10,CDC23,USP2,DNAJA1,HSPA1L,DNAJB13,USO1,USP3,STUB1,USP16,USP47,HSPA4L,PSMB9,IFNG,NEDD4,HSPH1,UBE2R2,DNAJC1,DNAJB9,DNAJC11,HSPA…
CD27 Signaling in Lymphocytes	3.14E00	3.85E-01	NaN	MAP2K4,MAP2K6,MAP3K15,MAP3K11,MAP3K13,MAP3K1,MAPK12,IKBKB,TRAF2,NFKBIA,MAP3K7,MAP3K8,IKBKAP,MAP2K3,CYCS,TRAF5,CASP8,NFKBIB,MAP2K1,MAP3K2
Role of Pattern Recognition Receptors in Recognition of Bacteria and Viruses	3.1E00	3.07E-01	-1.461	MAP2K4,IL1A,LIF,MAPK1,PIK3R5,C1QC,C1QA,C1QB,IRF3,IL6,PIK3R4,PRKCZ,MAPK3,PIK3CG,TLR1,TLR7,CLEC6A,IL17F,PRKCA,IL4,PTX3,IFNG,CXCL8,C5AR1,IL10,MAPK12,TLR9,PRKCG,NOD2,IRF7,IL18,TLR5,PLCG2,TLR6,PIK3R6,MAVS,CSF2,TNF,PRKCB
14-3-3-mediated Signaling	3.08E00	3.11E-01	NaN	MAP2K4,MAPK1,PIK3R5,KRAS,PIK3R4,PRKCZ,SRPK2,PLCD3,PIK3CG,MAPK3,AKT3,TUBB4A,TUBA1C,PLCL1,PLCD4,MAP2K1,PRKCA,SRC,TUBB3,YWHAG,TNFRSF1A,RRAS,YWHAZ,TUBA4A,PLCL2,MAPK12,PRKCG,TRAF2,CBL,FOXO1,TUBB6,PLCG2,PIK3R6,RPS6KA1,SFN,TNF,PRKCB
Induction of Apoptosis by HIV1	3.07E00	3.67E-01	1.528	MAP2K4,NAIP,SLC25A4,TNFRSF1A,MAPK12,DFFA,BCL2,DIABLO,DAXX,IKBKB,TRAF2,NFKBIA,DFFB,IKBKAP,CYCS,SLC25A10,NFKBIB,CASP8,TNFRSF1B,SLC25A5,TNF,BIRC3
Cell Cycle: G2/M DNA Damage Checkpoint Regulation	3.07E00	3.88E-01	1.291	PRKDC,CKS2,YWHAG,CCNB3,YWHAZ,CDK1,PRKCZ,SKP2,PPM1D,GADD45A,TOP2A,CKS1B,PKMYT1,ATR,RPS6KA1,SFN,HIPK2,BRCA1,CHEK2
Airway Pathology in Chronic Obstructive Pulmonary Disease	3.06E00	7.5E-01	NaN	CXCL8,CXCL3,CELA2A,MMP2,TNF,MMP9
IL-17A Signaling in Fibroblasts	3.05E00	4.29E-01	NaN	MAPK1,CEBPD,IL17RC,MAPK13,CXCL5,IL6,MAPK12,NFKBIZ,IKBKB,NFKBIA,TRAF3IP2,CCL2,MAPK3,MAP3K7,NFKBIB
T Helper Cell Differentiation	3.01E00	3.47E-01	NaN	IL6ST,IFNG,TGFBR1,TNFRSF1A,IL10,IL21R,HLA-DQA1,FOXP3,IFNGR1,HLA-DQB1,IL6,RORC,CD28,IL18,CD40,IL23R,HLA-DMA,HLA-DRA,IL10RA,HLA-DOB,TNFRSF1B,IL17F,TNF,ICOSLG/LOC102723996,IL4
Glucocorticoid Receptor Signaling	2.97E00	2.63E-01	NaN	CD247,MAP2K4,TGFBR1,MAPK1,SGK1,HSPA1A/HSPA1B,ARID2,KRAS,IL6,MAPK13,MNAT1,PIK3R4,HSPA5,FCGR1A,IL1R2,HSPA4,IKBKB,CXCL3,PIK3CG,MAPK3,MAP3K7,SERPINE1,NFKBIB,TAB1,CXCL8,RRAS,TBP,MAPK12,MED14,NCOA3,TAF4B,CD3G,TAF1,IL1RN,PIK3R6,TNF,POU2F2,HSPA6,PIK3R5,TAF7,JAK2,CCL3,NFATC1,HSPA1L,BCL2,NFKBIA,POLR2C,NFAT5,CCL2,SOS1,CEBPA,SMAD4,AKT3,NCOR1,NOS2,MAP2K1,IL4,ADRB2,TAF12,IFNG,SRA1,CCNH,IL10,TAF5L,ACTB,MAP3K1,C…
CD40 Signaling	2.94E00	3.54E-01	1.043	MAP2K6,MAP2K4,MAPK1,PIK3R5,TNFAIP3,MAPK13,PIK3R4,MAPK12,IKBKB,TRAF2,NFKBIA,CD40,PIK3CG,MAPK3,PIK3R6,MAP3K7,IKBKAP,MAP2K3,TRAF5,MAPKAPK2,NFKBIB,MAP2K1,FCER2
p38 MAPK Signaling	2.92E00	3.08E-01	-0.174	MAP2K6,MAP2K4,IL1A,TGFBR1,TIFA,RPS6KA3,MAPK13,IRAK1,IL1R2,MKNK1,MAP3K7,MAP4K1,EEF2K,RPS6KA2,TNFRSF1B,MAPKAPK2,IL1RAP,TAB1,TNFRSF1A,CREB3,MKNK2,MAPK12,IL18RAP,PLA2G4A,DAXX,IL18,TRAF2,IL1RN,MEF2D,MEF2C,RPS6KA4,MAP2K3,RPS6KA1,TNF,IRAK4,HSPB1
Caveolar-mediated Endocytosis Signaling	2.91E00	3.42E-01	NaN	COPZ1,ITSN1,COPA,RAB5B,ITGB8,COPB2,ITGB7,ITGB3,RAB5A,CD55,FLNA,PTPN1,ITGAV,ITGB5,MAP3K2,PRKCA,SRC,ACTB,ITGA2,FLOT1,COPG1,ITGB2,ITGA1,ACTG1,ITGAX
UVA-Induced MAPK Signaling	2.89E00	3.26E-01	-0.756	MAP2K4,MAPK1,PARP2,RPS6KA3,PIK3R5,KRAS,MAPK13,PIK3R4,PLCD3,TIPARP,MAPK3,PIK3CG,RPS6KA2,PLCL1,PLCD4,SMPD3,PRKCA,PARP14,RRAS,ZC3HAV1,PARP8,PARP3,PLCL2,MAPK12,PLCG2,PIK3R6,RPS6KA4,CYCS,RPS6KA1
Apoptosis Signaling	2.89E00	3.26E-01	1.3	MAP2K4,MAPK1,KRAS,DFFA,BCL2,DIABLO,IKBKB,NFKBIA,MAPK3,NFKBIB,TNFRSF1B,CASP8,MAP2K1,BIRC3,PRKCA,MCL1,AIFM1,NAIP,RRAS,TNFRSF1A,CDK1,PLCG2,CAPN1,DFFB,CYCS,RPS6KA1,SPTAN1,BCL2A1,TNF
T Cell Receptor Signaling	2.82E00	3.14E-01	NaN	MAP2K4,CD247,MAPK1,PIK3R5,KRAS,PIK3R4,NFATC1,IKBKB,CD28,LCK,NFAT5,NFKBIA,PIK3CG,MAPK3,SOS1,MAP2K1,RRAS,MAP3K1,MALT1,CD3D,TEC,BTK,CALM1 (includes others),CD3G,PTPRH,CBL,CARD11,GRAP2,PAG1,RASGRP1,PIK3R6,VAV1
PPAR Signaling	2.81E00	3.19E-01	1.826	PPARA,IL1A,MAPK1,PDGFA,KRAS,IL1R2,IKBKB,NFKBIA,MAPK3,SOS1,PDGFRA,MAP3K7,NCOR1,TNFRSF1B,NFKBIB,MAP2K1,IL1RAP,TAB1,CITED2,SRA1,RRAS,PPARD,TNFRSF1A,NR1H3,IL18RAP,IL18,TRAF2,IL1RN,RXRA,TNF
Type I Diabetes Mellitus Signaling	2.76E00	3.06E-01	NaN	MAP2K6,MAP2K4,CD247,MAPK1,HLA-DQA1,JAK2,MAPK13,HLA-DQB1,IRAK1,BCL2,IKBKB,CD28,NFKBIA,HLA-DMA,HLA-DRA,MAP3K7,CASP8,TNFRSF1B,NFKBIB,NOS2,PTPRN,IL1RAP,IFNG,ICA1,TNFRSF1A,IFNGR1,MAPK12,CD3D,CD3G,TRAF2,HLA-DOB,MAP2K3,CYCS,TNF
Non-Small Cell Lung Cancer Signaling	2.73E00	3.38E-01	-0.943	PA2G4,MAPK1,TFDP1,ITPR2,RRAS,CDK6,PIK3R5,KRAS,PIK3R4,RB1,STK4,PIK3CG,MAPK3,E2F1,SOS1,ITPR3,TGFA,PIK3R6,AKT3,RASSF5,RXRA,MAP2K1,PRKCA,RASSF1
Virus Entry via Endocytic Pathways	2.73E00	3.16E-01	NaN	ITSN1,AP2B1,PIK3R5,KRAS,ITGB8,PIK3R4,PRKCZ,ITGB7,ITGB3,CD55,FLNA,PIK3CG,ITGB5,PRKCA,SRC,AP2M1,RRAS,ACTB,ITGA2,RAC3,AP2S1,PRKCG,DNM1,ITGB2,PLCG2,PIK3R6,TFRC,ITGA1,ACTG1,PRKCB
HGF Signaling	2.67E00	3.06E-01	-1.095	MAP2K4,MAP3K15,MAP3K11,MAPK1,PIK3R5,KRAS,IL6,PIK3R4,PRKCZ,PTK2,ELF3,PIK3CG,MAPK3,SOS1,MAP3K7,AKT3,MAP2K1,PRKCA,MAP3K2,ETS1,RRAS,MAP3K13,ITGA2,MAP3K1,MAPK12,RAP1A,PRKCG,ELF2,GAB1,PLCG2,PIK3R6,MAP3K8,PRKCB
Macropinocytosis Signaling	2.64E00	3.38E-01	-1.069	MRC1,SRC,RRAS,PDGFA,PIK3R5,KRAS,ITGB8,PIK3R4,CSF1R,ITGB7,PRKCZ,PRKCG,ITGB3,ITGB2,RAB5A,CSF1,PIK3CG,PLCG2,PIK3R6,ACTN4,ITGB5,PRKCA,PRKCB
Ceramide Signaling	2.63E00	3.21E-01	1.177	MAP2K4,PIK3R5,PPP2R3B,KRAS,PIK3R4,PRKCZ,BCL2,KSR1,DIABLO,MAPK3,PIK3CG,SPHK1,AKT3,TNFRSF1B,MAP2K1,SMPD3,RRAS,TNFRSF1A,MAP3K1,S1PR4,PPP2R4,PPP2R3A,PIK3R6,CYCS,PPP2R5E,PPP2R1B,TNF
4-1BB Signaling in T Lymphocytes	2.61E00	4.19E-01	-0.302	MAP2K4,IKBKB,TRAF2,TNFRSF9,NFKBIA,MAPK1,MAPK3,TNFSF9,IKBKAP,MAPK13,NFKBIB,MAPK12,MAP2K1
Paxillin Signaling	2.58E00	3.07E-01	0.209	MAP2K4,MAPK1,ARF1,ARHGEF7,PIK3R5,KRAS,ITGB8,MAPK13,PIK3R4,PTPN12,ITGB7,ITGB3,PTK2,ARFIP2,PIK3CG,SOS1,ITGAV,ITGB5,SRC,RRAS,ACTB,ACTN2,ITGA2,MAPK12,ITGB2,TLN2,PIK3R6,ITGA1,ACTN4,ACTG1,ITGAX
Salvage Pathways of Pyrimidine Ribonucleotides	2.53E00	3E-01	NaN	MAP2K4,MAP2K6,DMPK,FAM20B,MAPK1,SGK1,LIMK2,TTK,CDA,NME7,APOBEC3A,IRAK1,NME6,PRKX,CDK8,CDK5,PIM1,MAPK3,PRPF4B,MAP2K1,AK7,GRK4,CDK6,PKN1,CDK1,APOBEC3G,AK5,APOBEC3H,UCK1,AK4,MAP2K3,MAP3K8,NEK2
Granulocyte Adhesion and Diapedesis	2.52E00	2.74E-01	NaN	CCL20,SDC4,ITGB3,IL1R2,CXCL10,HRH1,CXCL3,EZR,CXCL1,CCL15,IL1RAP,CSF3R,CXCL8,HRH2,PF4,MMP2,IL18,IL1RN,ITGA1,CCL18,TNF,HSPB1,IL1A,MMP14,CCL22,CXCL5,CCL3,MMP25,ICAM2,CCL2,CXCR2,CCL3L3,XCL2,XCL1,MMP11,TNFRSF1B,MMP19,C5AR1,CCL23,TNFRSF1A,ITGA2,CXCL6,IL18RAP,ITGB2,CXCL16,CLDN1,CXCL2,CLDN3,MMP9
p53 Signaling	2.5E00	3.06E-01	1.279	PIK3R5,HIF1A,PIK3R4,BCL2,RB1,GADD45A,PPP1R13B,PIK3CG,ADCK3,AKT3,HIPK2,BRCA1,TNFRSF10A,CHEK2,PRKDC,HDAC9,TP53INP1,TNFRSF10B,HDAC1,TIGAR,TP53I3,PCNA,E2F1,SIRT1,PIK3R6,GNL3,ATR,SFN,PIDD1,DRAM1
IL-17A Signaling in Gastric Cells	2.48E00	4.4E-01	NaN	MAP2K4,CXCL10,CXCL8,MAPK1,MAPK3,IL17RC,CCL20,CXCL1,MAPK13,MAPK12,TNF
Natural Killer Cell Signaling	2.48E00	2.96E-01	NaN	CD247,MAPK1,KLRD1,PIK3R5,NCR3,KRAS,PIK3R4,OCRL,PRKCZ,LCK,KLRC2,MAPK3,INPP5B,PIK3CG,SOS1,AKT3,KLRC3,MAP2K1,FCGR3A/FCGR3B,KLRC1,PRKCA,RRAS,FCGR2A,RAC3,LILRB1,SIGLEC7,PRKCG,NCR1,PLCG2,CD244,PIK3R6,VAV1,SH2D1B,PRKCB
Acute Myeloid Leukemia Signaling	2.46E00	3.17E-01	-1.213	CSF3R,MAP2K4,MAP2K6,MAPK1,RRAS,PIK3R5,KRAS,PIK3R4,CSF1R,IDH1,EIF4EBP1,CSF2RB,PIM1,PIK3CG,MAPK3,RARA,SOS1,PIK3R6,CEBPA,AKT3,KIT,MAP2K3,JUP,MAP2K1,TCF7L2,PIM2
LXR/RXR Activation	2.46E00	2.89E-01	0.784	APOE,SCD,IL1A,MSR1,CD36,ABCG1,IRF3,IL6,IL1R2,FDFT1,HPR,LYZ,CCL2,FASN,LPL,SERPINA1,NCOR1,NOS2,TNFRSF1B,IL1RAP,APOM,TNFRSF1A,NR1H3,IL18RAP,IL18,LY96,IL1RN,SREBF1,MYLIP,ACACA,PLTP,RXRA,HMGCR,TNF,MMP9,HADH,CLU
Pyridoxal 5'-phosphate Salvage Pathway	2.46E00	3.24E-01	NaN	MAP2K4,PDXK,MAP2K6,GRK4,DMPK,FAM20B,MAPK1,SGK1,CDK6,LIMK2,TTK,PKN1,CDK1,IRAK1,PRKX,CDK8,CDK5,PIM1,MAPK3,PRPF4B,MAP3K8,MAP2K3,NEK2,MAP2K1
MSP-RON Signaling Pathway	2.43E00	3.62E-01	NaN	IFNG,ACTB,PIK3R5,CCR2,JAK2,PIK3R4,PRKCZ,CSF2RB,ITGB2,CCL2,CSF1,PIK3CG,PIK3R6,RPS6KA2,NOS2,TNF,ACTG1
Fcγ Receptor-mediated Phagocytosis in Macrophages and Monocytes	2.42E00	3.03E-01	-0.73	MAPK1,FCGR1A,PRKCZ,HMOX1,YES1,MAPK3,PIK3CG,EZR,VAMP3,HCK,AKT3,FGR,FCGR3A/FCGR3B,PRKCA,SRC,ARPC5L,FCGR2A,ACTB,FYB,RAC3,PLD1,PRKCG,NCF1,ARPC1A,TLN2,CBL,VAV1,CSF2,ACTG1,PRKCB
Telomerase Signaling	2.42E00	3.03E-01	-0.655	MAPK1,TERT,PIK3R5,HDAC10,PPP2R3B,KRAS,PIK3R4,RB1,ELF3,SP1,MAPK3,PIK3CG,SOS1,AKT3,MAP2K1,POT1,ETS1,HDAC9,HDAC4,RRAS,HDAC1,DKC1,ELF2,PPP2R4,PPP2R3A,E2F1,PIK3R6,TINF2,PPP2R5E,PPP2R1B
TNFR2 Signaling	2.39E00	4.14E-01	0	MAP2K4,IKBKB,NAIP,TRAF2,NFKBIA,MAP3K1,TNFAIP3,TBK1,TNFRSF1B,NFKBIB,BIRC3,TNF
ATM Signaling	2.38E00	3.39E-01	0	MAP2K4,SMC3,CREB3,CCNB3,MAPK13,CBX5,MAPK12,CDK1,RAD50,SMC1A,RAD51,BRAT1,NFKBIA,GADD45A,SMC1B,TP53BP1,TLK1,BLM,BRCA1,CHEK2
B Cell Activating Factor Signaling	2.37E00	3.75E-01	0.277	MAP2K4,MAPK1,MAP3K1,MAPK13,MAPK12,TNFRSF13C,NFATC1,IKBKB,TRAF2,NFKBIA,NFAT5,IKBKAP,TRAF5,NFKBIB,TNFSF13B
Sphingosine-1-phosphate Signaling	2.33E00	2.92E-01	-0.756	MAPK1,PDGFA,ADCY4,RHOT2,PIK3R5,CASP4,PIK3R4,RHOH,PTK2,PLCD3,RHOG,RHOB,RHOD,RHOT1,MAPK3,PIK3CG,CASQ1,PDGFRA,SPHK1,AKT3,GNA13,PLCL1,CASP8,SMPD3,PLCD4,GNA12,PLCL2,ASAH1,S1PR4,PLCG2,PIK3R6,FNBP1,CASP5
NGF Signaling	2.33E00	2.92E-01	-2.121	MAP2K4,MAP3K15,MAP3K11,MAPK1,PIK3R5,RPS6KA3,KRAS,PIK3R4,PRKCZ,IKBKB,RHOG,PIK3CG,MAPK3,TRAF4,SOS1,MAP3K7,AKT3,RPS6KA2,MAP2K1,SMPD3,MAP3K2,RRAS,MAP3K13,CREB3,MAP3K1,MAPK12,RAP1A,GAB1,PLCG2,PIK3R6,MAP3K8,RPS6KA4,RPS6KA1
Role of IL-17A in Psoriasis	2.32E00	5.38E-01	NaN	CXCL8,CXCL3,IL17RC,CCL20,CXCL1,CXCL5,CXCL6
Tec Kinase Signaling	2.31E00	2.73E-01	-0.333	MAP2K4,GTF2I,RHOT2,PIK3R5,JAK2,PIK3R4,RHOH,PRKCZ,GNG7,PTK2,YES1,LCK,RHOG,GNA15,RHOB,TNFSF12,RHOD,RHOT1,PIK3CG,HCK,GNA13,TNFRSF10A,GNG12,FGR,PRKCA,TNFRSF21,GNG4,SRC,GNA12,ACTB,ITGA2,TNFRSF10B,MAPK12,PRKCG,TEC,BTK,PLCG2,TNFRSF25,PIK3R6,VAV1,TNF,ACTG1,FNBP1,PRKCB
ILK Signaling	2.29E00	2.66E-01	-0.438	MAP2K4,MAPK1,PPP2R3B,PIK3R4,MYH7B,PPP1R14B,ITGB3,PTK2,VEGFA,PARVB,RHOG,RHOB,MAPK3,PIK3CG,IRS2,ITGB5,CREB3,MAPK12,PPP2R3A,PPP2R4,PIK3R6,ACTN4,ACTG1,TNF,FNBP1,MAP2K6,FN1,RHOT2,PIK3R5,ILK,HIF1A,ITGB8,RHOH,ITGB7,TGFB1I1,RHOT1,FLNA,RHOD,AKT3,NOS2,LIMS2,TNFRSF1A,ACTN2,ACTB,ITGB2,SH2B2,RPS6KA4,PPP2R5E,PPP2R1B,MMP9
Role of MAPK Signaling in the Pathogenesis of Influenza	2.29E00	3.19E-01	NaN	MAP2K6,MAP2K4,IFNG,MAPK1,ABHD3,RRAS,PLA2R1,KRAS,MAPK13,MAPK12,BCL2,RABGEF1,CXCL10,PLA2G4A,CCL2,PLB1,MAPK3,AKT3,PNPLA3,MAP2K3,MAP2K1,TNF,PRKCA
Remodeling of Epithelial Adherens Junctions	2.28E00	3.24E-01	-1.265	SRC,TUBB3,RALA,ARPC5L,ACTB,MAPRE1,ACTN2,TUBA4A,CTNNA1,RAB5B,IQGAP1,APC,DNM1,RAB5A,ARPC1A,TUBB6,CBLL1,TUBB4A,TUBA1C,ACTN4,ACTG1,CTNND1
Phospholipase C Signaling	2.28E00	2.55E-01	-1.067	CD247,FCGR2C,MAPK1,ADCY4,HDAC10,KRAS,LCK,PPP1R12B,RHOG,RHOB,MAPK3,GNA13,GNG12,RALGDS,HDAC4,ITPR2,RRAS,RALB,CREB3,CD79A,RAPGEF3,RAP1A,PLD1,MARCKS,CD3G,PLCG2,ITPR3,ARHGEF18,FNBP1,PEBP1,RALA,ARHGEF7,RHOT2,RPS6KA3,FCGR2B,RHOH,PRKCZ,GNG7,NFATC1,TGM2,HMOX1,NFAT5,AHNAK,RHOT1,RHOD,SOS1,MAP2K1,PRKCA,GNG4,SRC,HDAC9,FCGR2A,ITGA2,HDAC1,CD3D,PRKCG,BTK,PLA2G4A,CALM1 (includes others),GRAP2,MEF2D,MEF2C,PRKCB
Regulation of IL-2 Expression in Activated and Anergic T Lymphocytes	2.22E00	3.09E-01	NaN	MAP2K4,CD247,TGFBR1,MAPK1,RRAS,MAP3K1,KRAS,MALT1,MAPK12,CD3D,NFATC1,CALM1 (includes others),CD3G,IKBKB,CD28,NFAT5,NFKBIA,CARD11,PLCG2,MAPK3,SOS1,SMAD4,VAV1,NFKBIB,MAP2K1
VEGF Signaling	2.2E00	2.96E-01	-0.816	EIF2B4,MAPK1,PIK3R5,KRAS,HIF1A,PIK3R4,BCL2,ARNT,VEGFA,PTK2,MAPK3,PIK3CG,SOS1,AKT3,MAP2K1,PRKCA,SRC,RRAS,ACTB,ACTN2,EIF2B3,FOXO1,PLCG2,EIF2B1,PIK3R6,ACTN4,SFN,ACTG1,PRKCB
DNA Methylation and Transcriptional Repression Signaling	2.19E00	4.5E-01	NaN	DNMT3B,MTA1,HDAC1,MTA2,ARID4B,SAP30,MBD2,SUDS3,DNMT1
Leukocyte Extravasation Signaling	2.17E00	2.6E-01	-1.206	MAP2K4,MAPK1,MAPK13,PIK3R4,ITGB3,PTK2,PIK3CG,EZR,DLC1,RAPGEF3,MMP2,NCF4,MAPK12,RAP1A,NCF1,RAP1GAP,PLCG2,PIK3R6,ITGA1,VAV1,ACTN4,ACTG1,SPN,MMP14,PIK3R5,CTNNA1,MMP25,RHOH,PRKCZ,SIPA1,MMP11,RASSF5,PRKCA,MMP19,SRC,ARHGAP6,ACTN2,ACTB,ITGA2,PRKCG,TEC,BTK,ITGB2,F11R,WIPF1,ARHGAP9,CLDN1,RASGRP1,FER,CLDN3,MMP9,PRKCB,CTNND1
Rac Signaling	2.17E00	2.9E-01	-1.095	MAP2K4,ABI2,MAP3K11,MAPK1,PIK3R5,PIKFYVE,LIMK2,KRAS,PIP5K1B,PIK3R4,IQGAP1,PARD6A,PRKCZ,CDK5R1,PTK2,IQGAP2,ARFIP2,PIK3CG,MAPK3,MAP2K1,NCKAP1,RRAS,ARPC5L,MAP3K1,ITGA2,PLD1,ARPC1A,CYFIP1,PIK3R6,SH3RF1,ELK4
PI3K Signaling in B Lymphocytes	2.16E00	2.78E-01	NaN	ATF7,MAPK1,KRAS,FCGR2B,NFATC1,PRKCZ,PLCD3,IKBKB,NFAT5,CAMK2D,NFKBIA,MAPK3,PIK3CG,AKT3,IRS2,PLCL1,NFKBIB,PLCD4,MAP2K1,IL4,CD19,ATF3,RRAS,ITPR2,CD79A,PLCL2,MALT1,BTK,CALM1 (includes others),CBL,CD40,DAPP1,PLCG2,SH2B2,ITPR3,VAV1,PRKCB
ERK/MAPK Signaling	2.15E00	2.62E-01	-0.577	MAPK1,PPP2R3B,KRAS,PIK3R4,PPP1R14B,PTK2,ELF3,PIK3CG,MAPK3,ETS1,PPP1R14C,YWHAG,RRAS,VRK2,CREB3,YWHAZ,PPP1R11,RAPGEF3,RAP1A,RAC3,TLN2,PPP2R3A,PPP2R4,PLCG2,PIK3R6,DUSP4,RPS6KA1,HSPB1,PPP1R3C,DUSP6,PIK3R5,NFATC1,DUSP2,EIF4EBP1,KSR1,PPP1R10,MKNK1,SOS1,MAP2K1,PRKCA,SRC,ITGA2,MKNK2,PRKCG,PLA2G4A,ELF2,RPS6KA4,PPP2R5E,PPP2R1B,PRKCB
UVC-Induced MAPK Signaling	2.14E00	3.57E-01	0.258	MAP2K4,SRC,MAPK1,RRAS,KRAS,MAPK13,MAPK12,PRKCZ,PRKCG,MAPK3,ATR,MAP2K1,SMPD3,PRKCA,PRKCB
Small Cell Lung Cancer Signaling	2.13E00	3.11E-01	NaN	PA2G4,TFDP1,CDK6,PIK3R5,PIK3R4,SKP2,BCL2,PTK2,RB1,IKBKB,PIAS3,TRAF2,NFKBIA,PIK3CG,E2F1,TRAF4,PIK3R6,CKS1B,AKT3,CYCS,TRAF5,RXRA,NFKBIB
AMPK Signaling	2.13E00	2.6E-01	-0.324	FOXO4,MAPK1,CPT1B,LIPE,PPP2R3B,ARID2,MAPK13,PIK3R4,PPM1D,PIK3CG,FASN,MAP3K7,IRS2,AK7,CPT1A,EEF2,CREB3,AK3,CHRNA10,MAPK12,MLST8,PFKM,ADRA1D,ADRA2A,PPP2R4,PPP2R3A,SIRT1,PIK3R6,CPT2,AK4,ACACA,MAP2K3,AK2,PPAT,PIK3R5,EIF4EBP1,CCNA2,AKT3,CPT1C,EEF2K,ADRB2,SRC,ACTB,PFKFB2,AK5,FOXO1,PPM1B,PPP2R5E,HMGCR,PPP2R1B,CAMKK2
Atherosclerosis Signaling	2.12E00	2.8E-01	NaN	APOE,IL1A,MSR1,PDGFA,CD36,PLA2R1,ALOX12,IL6,CCR2,LYZ,CCL2,TNFSF12,PLB1,LPL,PNPLA3,SERPINA1,COL11A2,IFNG,CXCL8,ALOX15,APOM,ABHD3,F3,PLA2G4A,COL1A1,ITGB2,COL5A3,IL18,CD40,IL1RN,CSF1,TNF,MMP9,CLU,COL3A1
Unfolded protein response	2.11E00	3.33E-01	NaN	HSPH1,HSPA1A/HSPA1B,CEBPD,HSPA6,HSPA5,DNAJB9,EIF2A,HSPA1L,BCL2,CEBPE,SEL1L,HSPA4,TRAF2,SREBF1,MBTPS1,EDEM1,CEBPA,EIF2AK3
DNA Double-Strand Break Repair by Homologous Recombination	2.09E00	5E-01	NaN	RAD51,LIG1,POLA1,RAD52,RPA1,BRCA1,RAD50
IL-12 Signaling and Production in Macrophages	2.07E00	2.73E-01	NaN	MAP2K4,APOE,MAPK1,PIK3R5,ALOX12,MAPK13,PIK3R4,PRKCZ,JMJD6,IKBKB,LYZ,MAPK3,PIK3CG,AKT3,SERPINA1,NOS2,NFKBIB,MAP2K1,IL4,PRKCA,IFNG,ALOX15,APOM,IL10,IFNGR1,MAPK12,PRKCG,IL18,CD40,IL23R,ZNF668,PIK3R6,MAP3K8,IRF8,RXRA,TNF,CLU,PRKCB
Glioma Signaling	2.07E00	2.9E-01	-0.209	MAPK1,PA2G4,PDGFA,PIK3R5,CDKN2C,KRAS,E2F3,RBL1,PIK3R4,PRKCZ,RB1,CAMK2D,PIK3CG,MAPK3,SOS1,PDGFRA,AKT3,MAP2K1,PRKCA,RBL2,TFDP1,RRAS,CDK6,PRKCG,CALM1 (includes others),PLCG2,E2F1,PIK3R6,PRKCB
VDR/RXR Activation	2.06E00	3.04E-01	-1.89	IFNG,TNFSF11,SPP1,PPARD,PDGFA,THBD,KLF4,NCOA3,PRKCZ,PRKCG,CXCL10,SP1,FOXO1,GADD45A,RUNX2,MXD1,CEBPA,NCOR1,VDR,CST6,CSF2,RXRA,PRKCA,PRKCB
PPARα/RXRα Activation	2.06E00	2.61E-01	1.809	PPARA,MAP2K4,MAP2K6,TGFBR1,MAPK1,ADCY4,CPT1B,CD36,BMPR2,KRAS,JAK2,IL6,ADIPOR1,IL1R2,IKBKB,PLCD3,NFKBIA,CHD5,GNA15,MAPK3,FASN,LPL,SOS1,MAP3K7,SMAD4,NCOR1,NFKBIB,PLCL1,IL1RAP,MAP2K1,PLCD4,ITGB5,PRKCA,RRAS,ACVR1,NCOA6,PLCL2,GH1,NCOA3,ACVR1B,IL18RAP,GK,PLCG2,MEF2C,MAP2K3,RXRA,ADIPOR2,PRKCB
NRF2-mediated Oxidative Stress Response	2.03E00	2.61E-01	0	MAP2K4,MAP2K6,MAPK1,DNAJB4,NQO2,ABCC2,PIK3R5,HSPB8,KRAS,DNAJC10,DNAJA1,PIK3R4,PRKCZ,DNAJB13,MAFG,HMOX1,AKR1A1,MAPK3,KEAP1,PIK3CG,MAP3K7,GSTM4,DNAJA3,FOSL1,TXN,MAP2K1,PRKCA,MGST1,RRAS,ACTB,MAP3K1,NQO1,DNAJC1,DNAJB9,GSTO1,PRKCG,DNAJC11,GSR,PIK3R6,DNAJB7,MAP2K3,EIF2AK3,ACTG1,DNAJB5,GSTP1,EPHX1,PRKCB
GM-CSF Signaling	2.03E00	3.17E-01	-2.236	ETS1,MAPK1,RRAS,PIK3R5,KRAS,JAK2,PIK3R4,CSF2RB,CAMK2D,PIM1,MAPK3,PIK3CG,SOS1,HCK,PIK3R6,AKT3,CSF2,BCL2A1,MAP2K1,PRKCB
Antioxidant Action of Vitamin C	2.03E00	2.86E-01	0.816	MAP2K4,MAPK1,PLA2R1,JAK2,MAPK13,GLRX,SLC2A3,SLC23A2,PLCD3,HMOX1,IKBKB,NFKBIA,PLB1,MAPK3,PNPLA3,TXN,PLCL1,NFKBIB,PLCD4,ABHD3,PLCL2,MAPK12,PLD1,GSTO1,PLA2G4A,CSF2RB,PLCG2,CSF2,TXNRD2,TNF
Gα12/13 Signaling	2.02E00	2.8E-01	-0.539	MAP2K4,F2RL2,MAPK1,PIK3R5,KRAS,PIK3R4,PTK2,IKBKB,NFKBIA,F2RL1,PIK3CG,MAPK3,AKT3,GNA13,NFKBIB,MAP2K1,SRC,CDH4,RRAS,GNA12,MAP3K1,MAPK12,TEC,BTK,LPAR6,CDH2,LPAR1,CDH20,MEF2D,PIK3R6,LPAR5,VAV1,MEF2C
Insulin Receptor Signaling	2.02E00	2.71E-01	NaN	FOXO4,EIF2B4,MAPK1,TRIP10,SGK1,PPP1R3C,PIK3R5,LIPE,KRAS,STXBP4,JAK2,PIK3R4,OCRL,PPP1R14B,PTPRF,PRKCZ,EIF4EBP1,PPP1R10,MAPK3,INPP5B,PIK3CG,PTPN1,SOS1,AKT3,IRS2,STX4,MAP2K1,PPP1R14C,RRAS,EIF2B3,PPP1R11,GRB10,CBL,FOXO1,GAB1,SH2B2,EIF2B1,PIK3R6
HER-2 Signaling in Breast Cancer	1.98E00	3.03E-01	NaN	RRAS,CDK6,PIK3R5,MMP2,ERBB3,KRAS,ITGB8,PIK3R4,PARD6A,ITGB7,PRKCZ,PRKCG,AREG,ITGB3,ITGB2,FOXO1,PIK3CG,SOS1,PIK3R6,AKT3,ITGB5,PRKCA,PRKCB
Chronic Myeloid Leukemia Signaling	1.97E00	2.9E-01	NaN	TGFBR1,MAPK1,PA2G4,PIK3R5,HDAC10,KRAS,PIK3R4,E2F3,RBL1,RB1,IKBKB,PIK3CG,MAPK3,CTBP2,SOS1,AKT3,SMAD4,MAP2K1,HDAC9,RBL2,HDAC4,TFDP1,RRAS,HDAC1,CDK6,E2F1,PIK3R6
Role of NFAT in Cardiac Hypertrophy	1.97E00	2.58E-01	1.043	MAP2K4,MAP2K6,IL6ST,TGFBR1,LIF,MAPK1,ADCY4,PIK3R5,HDAC10,KRAS,MAPK13,IL6,PIK3R4,PRKCZ,GNG7,PLCD3,CAMK2D,MAPK3,PIK3CG,SOS1,MAP3K7,AKT3,PLCL1,MAP2K1,PLCD4,GNG12,PRKCA,GNG4,SRC,HDAC9,AKAP5,HDAC4,RRAS,ITPR2,MAP3K1,HDAC1,PLCL2,MAPK12,PRKCG,CALM1 (includes others),PLCG2,MEF2D,ITPR3,PIK3R6,MEF2C,MAP2K3,SLC8A1,PRKCB
Differential Regulation of Cytokine Production in Macrophages and T Helper Cells by IL-17A and IL-17F	1.95E00	4.44E-01	NaN	CCL2,IL10,CXCL1,IL6,CCL3,CSF2,IL17F,TNF
Role of PKR in Interferon Induction and Antiviral Response	1.95E00	3.5E-01	NaN	MAP2K6,IFNG,TNFRSF1A,FCGR1A,IKBKB,TRAF2,NFKBIA,MAP3K7,CYCS,MAP2K3,TRAF5,NFKBIB,CASP8,TNF
autophagy	1.95E00	3.5E-01	NaN	STX17,ATG5,VPS39,ATG4B,VPS33A,VPS33B,PIK3R4,BCL2,ATG13,WDFY3,ATG4D,ATG4A,NBR1,ATG16L1
Fc Epsilon RI Signaling	1.95E00	2.78E-01	0	MAP2K6,MAP2K4,MAPK1,PIK3R5,KRAS,MAPK13,PIK3R4,OCRL,PRKCZ,PIK3CG,INPP5B,MAPK3,SOS1,AKT3,MAP2K1,PRKCA,IL4,RRAS,MAPK12,RAC3,PRKCG,BTK,PLA2G4A,GAB1,GRAP2,PLCG2,PIK3R6,VAV1,MAP2K3,CSF2,TNF,PRKCB
Cell Cycle: G1/S Checkpoint Regulation	1.95E00	3.12E-01	-0.243	HDAC9,RBL2,HDAC4,PA2G4,TFDP1,PAK1IP1,BMI1,HDAC1,CDK6,HDAC10,CDKN2C,E2F3,RBL1,SKP2,RB1,FOXO1,E2F1,SMAD4,ATR,GNL3
Aryl Hydrocarbon Receptor Signaling	1.94E00	2.67E-01	NaN	IL1A,MAPK1,POLA1,NQO2,IL6,RBL1,ARNT,TGM2,CCNA2,RB1,CYP1A2,SP1,RARA,MAPK3,ALDH3A2,GSTM4,ALDH6A1,CHEK2,SRC,CYP1A1,RBL2,MGST1,TFDP1,NQO1,CDK6,NCOA3,ALDH9A1,GSTO1,CYP1B1,AHRR,NFIA,E2F1,ALDH3B1,ATR,RXRA,ALDH3B2,TNF,GSTP1,HSPB1
LPS-stimulated MAPK Signaling	1.89E00	3.01E-01	-0.426	MAP2K6,MAP2K4,MAPK1,RRAS,PIK3R5,KRAS,MAPK13,PIK3R4,MAPK12,PRKCZ,PRKCG,IKBKB,NFKBIA,PIK3CG,MAPK3,PIK3R6,MAP3K7,MAP2K3,NFKBIB,MAP2K1,PRKCA,PRKCB
ErbB Signaling	1.87E00	2.91E-01	NaN	MAP2K6,MAP2K4,MAPK1,PIK3R5,KRAS,MAPK13,PIK3R4,PRKCZ,MAPK3,PIK3CG,SOS1,MAP2K1,PRKCA,RRAS,HBEGF,ERBB3,MAPK12,PRKCG,AREG,FOXO1,PLCG2,TGFA,PIK3R6,MAP2K3,PRKCB
Pancreatic Adenocarcinoma Signaling	1.85E00	2.78E-01	-1.46	MAP2K4,TGFBR1,RALA,MAPK1,PA2G4,PIK3R5,KRAS,JAK2,E2F3,PIK3R4,BCL2,RAD51,VEGFA,HMOX1,RB1,MAPK3,PIK3CG,AKT3,SMAD4,MAP2K1,RALGDS,TFDP1,HBEGF,MAPK12,PLD1,E2F1,PIK3R6,TGFA,NOTCH1,MMP9
Dermatan Sulfate Biosynthesis (Late Stages)	1.84E00	3.27E-01	NaN	NDST3,GAL3ST2,SULT1C4,CHST7,HS2ST1,DSEL,CHST15,SULT1A2,CHST2,CHST1,SULT4A1,UST,SULT1A1,SULT1A3/SULT1A4,CHST3,NDST1
3-phosphoinositide Biosynthesis	1.83E00	2.57E-01	NaN	DUSP8,MTMR9,NUDT9,NUDT12,PIKFYVE,PIK3R5,IGBP1,NT5C,PIP5K1B,ACP5,PIK3R4,PTPN12,PPP1R14B,DUSP2,UBLCP1,PTPRF,ATP1A1,PDCD1,PPP1R13B,PIK3CG,PTPN1,PPM1F,NUDT4,PTPRN,ALPL,PI4KB,DOT1L,PP2D1,PGAM4,PPP4R1,NUDT15,DUSP14,TNS3,PTPRH,PPP2R4,PPP1R16B,PPP2R3A,CDIPT,PIK3R6,PPP2R5E,THTPA,PTPN22,SIRPA,DUSP16
Assembly of RNA Polymerase I Complex	1.83E00	5.56E-01	NaN	POLR1C,TAF1A,POLR1A,POLR1B,TBP
Erythropoietin Signaling	1.81E00	3E-01	NaN	SRC,MAPK1,RRAS,PIK3R5,KRAS,JAK2,PIK3R4,PRKCZ,PRKCG,NFKBIA,CBL,PIK3CG,PLCG2,MAPK3,SOS1,PIK3R6,AKT3,NFKBIB,MAP2K1,PRKCA,PRKCB
Agranulocyte Adhesion and Diapedesis	1.8E00	2.53E-01	NaN	IL1A,FN1,MMP14,CCL20,CCL22,SDC4,CXCR1,CXCL5,CCL3,MMP25,MYH7B,ITGB7,CXCL10,CXCL3,HRH1,ICAM2,CCL2,CCL3L3,CXCR2,EZR,XCL2,CXCL1,MMP11,XCL1,CCL15,MMP19,CXCL8,C5AR1,CCL23,TNFRSF1A,ACTB,PF4,ITGA2,MMP2,CXCL6,ITGB2,CXCL16,IL18,PODXL2,CLDN1,IL1RN,ITGA1,CCL18,CXCL2,TNF,ACTG1,MMP9,CLDN3
PDGF Signaling	1.79E00	2.89E-01	-2.449	MAP2K4,SRC,MAPK1,RRAS,PDGFA,MAP3K1,PIK3R5,KRAS,JAK2,PIK3R4,OCRL,ABL2,PIK3CG,PLCG2,INPP5B,MAPK3,SOS1,PDGFRA,PIK3R6,SPHK1,CSNK2B,MAP2K1,PRKCA,PRKCB
Cardiac Hypertrophy Signaling	1.78E00	2.46E-01	0.137	MAP2K4,MAP3K15,MAP3K11,TGFBR1,MAPK1,ADCY4,KRAS,MAPK13,IL6,PIK3R4,PLCD3,RHOG,RHOB,GNA15,MAPK3,PIK3CG,MAP3K7,GNA13,PLCL1,GNG12,TAB1,MAP3K2,RRAS,MAP3K13,EIF2B3,PLCL2,MAPK12,ADRA1D,ADRA2A,PLCG2,PIK3R6,MAP2K3,RPS6KA1,FNBP1,HSPB1,MAP2K6,EIF2B4,RHOT2,PIK3R5,RHOH,GNG7,RHOT1,RHOD,SOS1,MAPKAPK2,PLCD4,MAP2K1,ADRB2,GNG4,CACNA1D,GNA12,MAP3K1,CALM1 (includes others),MEF2D,EIF2B1,MEF2C,MAP3K8
3-phosphoinositide Degradation	1.77E00	2.6E-01	NaN	DUSP8,MTMR9,NUDT9,NUDT12,MTMR1,IGBP1,NT5C,ACP5,OCRL,PPP1R14B,PTPN12,DUSP2,UBLCP1,PTPRF,ATP1A1,PDCD1,INPP5B,PPP1R13B,PTPN1,MTM1,PPM1F,NUDT4,ALPL,PTPRN,DOT1L,PP2D1,PGAM4,PPP4R1,NUDT15,DUSP14,TNS3,PTPRH,PPP2R4,PPP1R16B,PPP2R3A,PPP2R5E,THTPA,PTPN22,SIRPA,DUSP16
D-myo-inositol (1,4,5,6)-Tetrakisphosphate Biosynthesis	1.77E00	2.65E-01	NaN	DUSP8,MTMR9,NUDT9,NUDT12,NT5C,IGBP1,ACP5,PPP1R14B,PTPN12,PTPRF,UBLCP1,DUSP2,ATP1A1,PDCD1,PPP1R13B,PTPN1,PPM1F,NUDT4,ALPL,PTPRN,DOT1L,PP2D1,PGAM4,PPP4R1,NUDT15,DUSP14,TNS3,PTPRH,PPP2R4,PPP1R16B,PPP2R3A,PPP2R5E,THTPA,PTPN22,SIRPA,DUSP16
D-myo-inositol (3,4,5,6)-tetrakisphosphate Biosynthesis	1.77E00	2.65E-01	NaN	DUSP8,MTMR9,NUDT9,NUDT12,NT5C,IGBP1,ACP5,PPP1R14B,PTPN12,PTPRF,UBLCP1,DUSP2,ATP1A1,PDCD1,PPP1R13B,PTPN1,PPM1F,NUDT4,ALPL,PTPRN,DOT1L,PP2D1,PGAM4,PPP4R1,NUDT15,DUSP14,TNS3,PTPRH,PPP2R4,PPP1R16B,PPP2R3A,PPP2R5E,THTPA,PTPN22,SIRPA,DUSP16
Sertoli Cell-Sertoli Cell Junction Signaling	1.77E00	2.53E-01	NaN	MAP2K4,MAP3K15,MAP3K11,MAPK1,AXIN1,CTNNA1,ILK,KRAS,SYMPK,MAPK13,TJAP1,MAPK3,KEAP1,MAP3K7,AKT3,TUBB4A,TUBA1C,JUP,NOS2,MAP2K1,RAB8B,MAP3K2,SRC,EPN1,TUBB3,TJP2,RRAS,TNFRSF1A,ACTN2,MAP3K13,ACTB,MAP3K1,ITGA2,TUBA4A,MAPK12,F11R,TUBB6,CLDN1,ZAK,MAP3K8,MAP2K3,SPTAN1,ACTN4,TNF,A2M,ACTG1,CLDN3
Nur77 Signaling in T Lymphocytes	1.77E00	3.1E-01	NaN	CD247,HDAC9,HDAC1,HLA-DQA1,HLA-DQB1,CD3D,NFATC1,BCL2,CD28,CALM1 (includes others),CD3G,HLA-DMA,MEF2D,HLA-DRA,HLA-DOB,CYCS,RXRA,MAP3K2
Communication between Innate and Adaptive Immune Cells	1.77E00	2.83E-01	NaN	IL1A,IL6,CCL3,CXCL10,CD28,TLR10,CCL3L3,TLR1,HLA-DRA,TLR7,CCL15,TNFSF13B,IL4,CXCL8,IFNG,IL10,IL15,TLR9,TNFRSF13C,IL18,TLR5,CD40,IL1RN,TLR6,CSF2,TNF
CD28 Signaling in T Helper Cells	1.75E00	2.68E-01	-0.626	MAP2K4,CD247,PIK3R5,HLA-DQA1,HLA-DQB1,PIK3R4,NFATC1,IKBKB,CD28,LCK,NFAT5,NFKBIA,HLA-DMA,PIK3CG,HLA-DRA,AKT3,NFKBIB,MAP2K1,ARPC5L,ITPR2,MAP3K1,MALT1,MAPK12,CD3D,CD3G,CALM1 (includes others),ARPC1A,GRAP2,CARD11,ITPR3,PIK3R6,HLA-DOB,VAV1
Polyamine Regulation in Colon Cancer	1.73E00	3.91E-01	NaN	PSMA8,AZIN1,MXD1,SAT1,SAT2,KRAS,PSME3,ODC1,APC
Differential Regulation of Cytokine Production in Intestinal Epithelial Cells by IL-17A and IL-17F	1.73E00	3.91E-01	NaN	IFNG,IL1A,CCL2,IL10,CXCL1,CCL3,CSF2,IL17F,TNF
Granzyme B Signaling	1.72E00	4.38E-01	0.378	PRKDC,NUMA1,DFFB,CYCS,CASP8,LMNB1,DFFA
Cell Cycle Control of Chromosomal Replication	1.7E00	3.7E-01	NaN	ORC2,CDK5,ORC5,CDC7,CDK6,RPA1,ORC4,CHEK2,DBF4,RPA2
Role of CHK Proteins in Cell Cycle Checkpoint Control	1.68E00	3.09E-01	-1.604	PPP2R3B,RPA1,E2F3,CDK1,RAD50,RAD1,PCNA,PPP2R3A,PPP2R4,E2F1,ATR,CLSPN,TLK1,PPP2R5E,BRCA1,PPP2R1B,CHEK2
iNOS Signaling	1.66E00	3.19E-01	-2	IFNG,MAPK1,IFNGR1,MAPK13,JAK2,MAPK12,IRAK1,IKBKB,CALM1 (includes others),LY96,NFKBIA,NOS2,NFKBIB,IRAK4,TAB1
EGF Signaling	1.62E00	3E-01	-1.414	MAP2K4,SRC,MAPK1,ITPR2,MAP3K1,PIK3R5,MAPK13,PIK3R4,MAPK12,MAPK3,PIK3CG,SOS1,ITPR3,PIK3R6,AKT3,CSNK2B,MAP2K1,PRKCA
D-myo-inositol-5-phosphate Metabolism	1.62E00	2.55E-01	NaN	DUSP8,MTMR9,NUDT9,NUDT12,IGBP1,NT5C,ACP5,PPP1R14B,PTPN12,PTPRF,UBLCP1,DUSP2,PLCD3,ATP1A1,PDCD1,PPP1R13B,PTPN1,PPM1F,NUDT4,PLCD4,ALPL,PTPRN,DOT1L,PP2D1,PPP4R1,PGAM4,NUDT15,DUSP14,TNS3,PTPRH,PPP2R4,PPP1R16B,PPP2R3A,PLCG2,PPP2R5E,THTPA,PTPN22,SIRPA,DUSP16
Growth Hormone Signaling	1.6E00	2.88E-01	-0.218	MAPK1,RPS6KA3,PIK3R5,JAK2,PIK3R4,GH1,PRKCZ,PRKCG,GH2,MAPK3,PLCG2,PIK3CG,CSHL1,CEBPA,PIK3R6,RPS6KA4,RPS6KA2,RPS6KA1,A2M,PRKCA,PRKCB
Renal Cell Carcinoma Signaling	1.6E00	2.88E-01	-2.673	ETS1,MAPK1,RRAS,PIK3R5,KRAS,HIF1A,PIK3R4,RAP1A,ARNT,UBD,VEGFA,GAB1,PIK3CG,MAPK3,SOS1,TGFA,PIK3R6,AKT3,EGLN3,UBC,MAP2K1
CNTF Signaling	1.59E00	3.08E-01	-2.5	IL6ST,MAPK1,RRAS,PIK3R5,RPS6KA3,KRAS,JAK2,PIK3R4,PIK3CG,MAPK3,SOS1,PIK3R6,RPS6KA4,RPS6KA2,RPS6KA1,MAP2K1
Hereditary Breast Cancer Signaling	1.58E00	2.6E-01	NaN	FANCM,PIK3R5,HDAC10,KRAS,ARID2,DDB2,PIK3R4,RAD50,RAD51,RB1,FANCB,POLR2C,GADD45A,PIK3CG,AKT3,BRCA1,BLM,CHEK2,HDAC9,HDAC4,RRAS,ACTB,HDAC1,CDK6,RPA1,CDK1,UBD,PALB2,MSH2,E2F1,PIK3R6,ATR,SFN,UBC
Hepatic Cholestasis	1.58E00	2.49E-01	NaN	PPARA,MAP2K4,IL1A,LIF,ABCC2,ADCY4,IL6,PRKCZ,CYP8B1,IRAK1,IL1R2,IKBKB,NFKBIA,RARA,PPRC1,MAP3K7,IL17F,NFKBIB,TNFRSF1B,IL1RAP,PRKCA,IL4,ABCB1,IFNG,CXCL8,TJP2,CYP27A1,TNFRSF1A,NR1H3,MAPK12,PRKCG,IL18RAP,TRAF2,LY96,IL18,SLCO3A1,ABCB4,SREBF1,IL1RN,CSF2,RXRA,TNF,IRAK4,PRKCB
Cyclins and Cell Cycle Regulation	1.56E00	2.82E-01	0.5	HDAC9,CCNH,HDAC4,PA2G4,TFDP1,HDAC1,CCNB3,CDK6,PPP2R3B,HDAC10,CDKN2C,E2F3,CDK1,SKP2,CCNA2,RB1,PPP2R4,PPP2R3A,E2F1,ATR,PPP2R5E,PPP2R1B
phagosome maturation	1.56E00	2.6E-01	NaN	ATP6V0A4,VPS39,ATP6V1D,ATP6V1C1,TCIRG1,DYNC1I1,PIKFYVE,NAPG,VPS33B,RAB5B,DYNLRB2,ATP6AP1,DYNC1I2,RAB5A,HLA-DRA,RAB7B,VAMP3,TUBB4A,TUBA1C,BET1L,TUBB3,YKT6,VPS33A,TUBA4A,ATP6V1A,DYNC1H1,ATP6V1F,ATP6V1H,TUBB6,DYNC1LI2,ATP6V0D1,ATP6V0A2,VPS37B
Agrin Interactions at Neuromuscular Junction	1.52E00	2.86E-01	0.728	MAP2K4,SRC,MAPK1,RRAS,ACTB,ARHGEF7,DVL1,ITGA2,KRAS,ERBB3,MAPK12,RAC3,ITGB3,PTK2,LAMC1,ITGB2,MAPK3,UTRN,ITGA1,ACTG1
UVB-Induced MAPK Signaling	1.52E00	3.02E-01	-0.5	MAP2K4,MAPK1,RPS6KA3,PIK3R5,MAPK13,PIK3R4,MAPK12,PRKCZ,EIF4EBP1,PRKCG,PIK3CG,MAPK3,PIK3R6,MAP2K1,PRKCB,PRKCA
Huntington's Disease Signaling	1.51E00	2.38E-01	NaN	MAP2K4,MAPK1,SGK1,HSPA1A/HSPA1B,NAPG,HDAC10,HSPA5,PIK3R4,CDK5R1,HSPA4,GNA15,MAPK3,PIK3CG,CASQ1,VAMP3,GNG12,HDAC4,CREB3,IFT57,TBP,UBE2S,STX1A,UBD,CAPN1,PIK3R6,CASP5,PACSIN1,HSPA6,PIK3R5,CASP4,HSPA1L,PRKCZ,GNG7,TGM2,DYNC1I2,POLR2C,ARFIP2,SP1,CDK5,SOS1,AKT3,NCOR1,CASP8,BET1L,PRKCA,GNG4,HDAC9,YKT6,HDAC1,PSME3,PRKCG,DNM1,PSMA8,CYCS,UBC,PRKCB
Adipogenesis pathway	1.51E00	2.58E-01	NaN	CEBPD,BMPR2,HDAC10,FBXW7,HIF1A,MNAT1,FGFR3,PAXIP1,CDK5,AGPAT2,CTBP2,LPL,CEBPA,HDAC9,ATG5,CCNH,HDAC4,TNFRSF1A,HDAC1,FGFR2,SENP2,SAP30,NR1D2,FOXO1,SREBF1,SIRT1,KLF5,KLF3,RPS6KA1,TCF7,TNF,PER2,RPS6KC1
PI3K/AKT Signaling	1.51E00	2.58E-01	-0.928	MAPK1,ILK,PPP2R3B,KRAS,JAK2,OCRL,PRKCZ,BCL2,EIF4EBP1,IKBKB,NFKBIA,MAPK3,INPP5B,PIK3CG,SOS1,AKT3,NFKBIB,MAP2K1,MCL1,RHEB,YWHAG,RRAS,ITGA2,YWHAZ,MAPK8IP1,FOXO1,GAB1,PPP2R4,PPP2R3A,MAP3K8,PPP2R5E,SFN,PPP2R1B
ErbB4 Signaling	1.48E00	2.9E-01	-0.5	ADAM17,PSENEN,MAPK1,RRAS,PIK3R5,KRAS,PIK3R4,PRKCZ,PRKCG,PLCG2,PIK3CG,MAPK3,SOS1,PIK3R6,APH1B,MAP2K1,PRKCA,PRKCB
Colorectal Cancer Metastasis Signaling	1.47E00	2.37E-01	-2.941	MAP2K4,TGFBR1,MAPK1,AXIN1,ADCY4,KRAS,IL6,PIK3R4,VEGFA,TLR10,RHOG,RHOB,MAPK3,PIK3CG,TLR1,GNG12,RALGDS,RRAS,MMP2,IFNGR1,TLR9,MAPK12,APC,PIK3R6,TNF,FNBP1,IL6ST,MMP14,RHOT2,LRP6,PIK3R5,JAK2,MMP25,RHOH,GNG7,RHOT1,RHOD,SOS1,TLR7,AKT3,SMAD4,MMP11,NOS2,MAP2K1,MMP19,GNG4,IFNG,SRC,TNFRSF1A,DVL1,WNT10A,MSH2,TLR5,TLR6,LRP1,MMP9,TCF7L2
Myc Mediated Apoptosis Signaling	1.46E00	2.93E-01	NaN	MAP2K4,YWHAG,RRAS,YWHAZ,PIK3R5,KRAS,PIK3R4,MAPK12,PRKCZ,BCL2,PIK3CG,SOS1,PIK3R6,AKT3,CYCS,CASP8,SFN
PTEN Signaling	1.46E00	2.58E-01	0	MAST2,FOXO4,TGFBR1,MAPK1,PIK3R5,ILK,BMPR2,KRAS,OCRL,PRKCZ,BCL2,PTK2,FGFR3,IKBKB,MAPK3,INPP5B,PIK3CG,SOS1,PDGFRA,AKT3,CSNK2B,MCRS1,MAP2K1,RRAS,ITGA2,FGFR2,PREX2,TNFRSF11A,RAC3,CBL,FOXO1
Neuregulin Signaling	1.46E00	2.69E-01	0.426	ADAM17,MAPK1,KRAS,CDK5R1,PRKCZ,CDK5,MAPK3,SOS1,GRB7,AKT3,MAP2K1,RNF41,PRKCA,SRC,RRAS,ERBB2IP,ITGA2,HBEGF,ERBB3,PRKCG,AREG,RPS6,PLCG2,TGFA,PRKCB
Acute Phase Response Signaling	1.45E00	2.46E-01	-0.324	MAP2K6,MAP2K4,IL6ST,IL1A,FN1,MAPK1,KRAS,MAPK13,JAK2,IL6,IRAK1,IKBKB,HMOX1,NFKBIA,F8,MAPK3,PIK3CG,SOS1,MAP3K7,AKT3,SERPINA1,SERPINE1,NOLC1,NFKBIB,TNFRSF1B,IL1RAP,MAP2K1,TAB1,RRAS,TNFRSF1A,MAP3K1,MAPK12,HMOX2,TRAF2,IL18,HP,IL1RN,C4BPA,MAP2K3,CRABP2,TNF,A2M
FGF Signaling	1.44E00	2.7E-01	-0.408	MAP2K6,MAPK1,FGF9,CREB3,MAP3K1,PIK3R5,FGFR2,MAPK13,PIK3R4,MAPK12,FGFR3,FGF18,GAB1,PIK3CG,MAPK3,SOS1,FGF12,PIK3R6,AKT3,MAP2K3,MAPKAPK2,MAP2K1,FRS2,PRKCA
CDK5 Signaling	1.41E00	2.62E-01	0	MAPK1,PPP1R3C,ADCY4,PPP2R3B,KRAS,MAPK13,PPP1R14B,CDK5R1,LAMC1,CDK5,PPP1R10,MAPK3,LAMA1,MAP2K1,PPP1R14C,LAMA5,RRAS,CABLES1,ITGA2,PPP1R11,MAPK12,FOSB,PPP2R3A,PPP2R4,CAPN1,PPP2R5E,PPP2R1B
Protein Kinase A Signaling	1.41E00	2.24E-01	NaN	TGFBR1,DUSP8,MAPK1,ADCY4,LIPE,PPP1R14B,PTK2,PLCD3,CAMK2D,PHKB,PDE7B,MAPK3,RYR3,GNA13,CDC16,NFKBIB,PLCL1,GNG12,PPP1R14C,KDELR1,YWHAG,ITPR2,CREB3,YWHAZ,PPP1R11,ANAPC7,PLCL2,RAP1A,PTPDC1,PTP4A1,PDE8A,PTPRH,PYGM,PLCG2,PTPRB,ITPR3,EYA3,CREM,ANAPC5,DUSP4,H1F0,SIRPA,PDE6D,AKAP12,HIST1H1C,PDE7A,AKAP8,PTPN9,DUSP6,PPP1R3C,CDC23,PTPN12,PRKCZ,PTPRF,GNG7,NFATC1,DUSP2,AKAP2,NFAT5,NFKBIA,PPP1R10,FLNA,H1FX,PTPN1…
Thrombopoietin Signaling	1.4E00	2.88E-01	-0.728	MAPK1,RRAS,PIK3R5,KRAS,JAK2,PIK3R4,PRKCZ,PRKCG,MAPK3,PLCG2,PIK3CG,SOS1,PIK3R6,IRS2,MAP2K1,PRKCA,PRKCB
Heparan Sulfate Biosynthesis (Late Stages)	1.4E00	2.88E-01	NaN	NDST3,GAL3ST2,SULT1C4,CHST7,HS2ST1,LIPE,CHST15,SULT1A2,CHST2,CHST1,SULT4A1,UST,SULT1A1,SULT1A3/SULT1A4,CHST3,EXTL2,NDST1
April Mediated Signaling	1.39E00	3.16E-01	1.155	MAP2K4,IKBKB,TRAF2,NFAT5,NFKBIA,MAPK1,MAP3K1,MAPK13,TRAF5,MAPK12,NFKBIB,NFATC1
Notch Signaling	1.39E00	3.16E-01	0.707	DLL1,ADAM17,DTX4,PSENEN,MAML3,APH1B,LFNG,RBPJ,MAML2,JAG1,NOTCH1,NUMBL
Crosstalk between Dendritic Cells and Natural Killer Cells	1.38E00	2.67E-01	NaN	IFNG,CD209,IL15RA,KLRD1,ACTB,CD69,IL15,NCR3,IL6,TLR9,CD28,CSF2RB,IL18,TLN2,CAMK2D,CD40,FSCN1,HLA-DRA,TLR7,CSF2,TNFRSF1B,TNF,ACTG1,IL4
Interferon Signaling	1.38E00	3.24E-01	0.333	IFNG,IFITM3,MX1,IFNGR1,IRF9,JAK2,IFNAR2,IFITM2,MED14,IFITM1,BCL2
Chondroitin Sulfate Biosynthesis (Late Stages)	1.38E00	2.91E-01	NaN	NDST3,GAL3ST2,SULT1C4,CHST7,HS2ST1,CSGALNACT1,CHST15,SULT1A2,CHST2,CHST1,SULT4A1,UST,SULT1A1,SULT1A3/SULT1A4,CHST3,NDST1
iCOS-iCOSL Signaling in T Helper Cells	1.37E00	2.57E-01	-1.213	CD247,PIK3R5,TRAT1,HLA-DQA1,HLA-DQB1,PIK3R4,NFATC1,IKBKB,CD28,LCK,CAMK2D,NFKBIA,NFAT5,HLA-DMA,PIK3CG,HLA-DRA,AKT3,NFKBIB,ICOSLG/LOC102723996,ITPR2,CD3D,CALM1 (includes others),CD3G,CD40,GRAP2,ITPR3,PIK3R6,HLA-DOB,VAV1
Melanocyte Development and Pigmentation Signaling	1.36E00	2.67E-01	-1.706	SRC,MAPK1,RRAS,MITF,ADCY4,CREB3,RPS6KA3,PIK3R5,KRAS,PIK3R4,BCL2,PIK3CG,PLCG2,MAPK3,SOS1,SH2B2,PIK3R6,KIT,RPS6KA4,RPS6KA2,MC1R,RPS6KA1,MAP2K1
Mouse Embryonic Stem Cell Pluripotency	1.36E00	2.63E-01	-1.8	IL6ST,LIF,MAPK1,AXIN1,PIK3R5,BMPR2,KRAS,JAK2,MAPK13,PIK3R4,MAPK3,PIK3CG,SOS1,MAP3K7,SMAD4,AKT3,MAP2K1,TAB1,RRAS,DVL1,MAPK12,APC,DVL2,PIK3R6,TCF7L2
Mitochondrial Dysfunction	1.34E00	2.39E-01	NaN	HSD17B10,MAP2K4,PSENEN,XDH,CPT1B,RHOT2,ATP5S,CYB5R3,BCL2,PDHA1,NDUFS1,PARK7,MT-CYB,ATPAF1,CPT1C,ACO1,CASP8,NDUFS4,AIFM1,NDUFA8,NDUFAF1,NDUFB4,CPT1A,NDUFS7,GLRX2,NDUFB1,VDAC3,MAPK12,MT-ND4L,GPX7,APP,GSR,VPS9D1,FIS1,MT-ND1,MT-ND5,PRDX3,APH1B,SDHD,CYCS,CYB5A,MT-ND3,TXNRD2,MAOA,COX15
Myo-inositol Biosynthesis	1.34E00	5E-01	NaN	ISYNA1,IMPA1,IMPAD1,IMPA2
Regulation of the Epithelial-Mesenchymal Transition Pathway	1.32E00	2.39E-01	NaN	MAP2K6,MAP2K4,ADAM17,TGFBR1,MAPK1,PSENEN,AXIN1,PIK3R5,KRAS,JAK2,HIF1A,PIK3R4,PARD6A,FGFR3,FGF18,MAPK3,PIK3CG,FGF12,SOS1,AKT3,SMAD4,FRS2,MAP2K1,ETS1,RRAS,FGF9,DVL1,FGFR2,MMP2,APC,CDH2,DVL2,WNT10A,GAB1,ZEB2,PIK3R6,APH1B,MAP2K3,RBPJ,JAG1,NOTCH1,MMP9,TCF7L2,CLDN3
Lymphotoxin β Receptor Signaling	1.31E00	2.86E-01	-1	MAPK1,PIK3R5,PIK3R4,DIABLO,IKBKB,TRAF2,NFKBIA,PIK3CG,MAPK3,TRAF4,PIK3R6,AKT3,IKBKAP,CXCL1,CYCS,TRAF5
Actin Nucleation by ARP-WASP Complex	1.31E00	2.86E-01	-1.291	ARPC5L,RRAS,GNA12,RHOT2,ITGA2,KRAS,RHOH,WIPF1,PPP1R12B,ARPC1A,RHOG,RHOB,RHOD,RHOT1,SOS1,FNBP1
Role of BRCA1 in DNA Damage Response	1.31E00	2.69E-01	-2.5	FANCM,IFNG,RBL2,ACTB,UIMC1,RPA1,ARID2,RBL1,E2F3,RAD50,RAD51,RB1,FANCB,GADD45A,MSH2,E2F1,ATR,BRIP1,BLM,BRCA1,CHEK2
IL-4 Signaling	1.31E00	2.69E-01	NaN	IRF4,RRAS,PIK3R5,HLA-DQA1,KRAS,JAK2,HLA-DQB1,PIK3R4,OCRL,NFATC1,NFAT5,HLA-DMA,PIK3CG,INPP5B,HLA-DRA,SOS1,PIK3R6,AKT3,HLA-DOB,IL4,FCER2
DNA damage-induced 14-3-3σ Signaling	1.3E00	3.68E-01	NaN	CCNB3,AKT3,ATR,SFN,BRCA1,CDK1,RAD1
Superpathway of Inositol Phosphate Compounds	1.3E00	2.34E-01	NaN	DUSP8,MTMR9,PIKFYVE,IGBP1,PIP5K1B,ACP5,PIK3R4,PPP1R14B,PLCD3,ATP1A1,PDCD1,PIK3CG,PPP1R13B,PTPRH,PPP2R3A,PPP2R4,CDIPT,PLCG2,PIK3R6,THTPA,SIRPA,NUDT9,NUDT12,PIK3R5,NT5C,OCRL,PTPN12,PTPRF,UBLCP1,DUSP2,INPP5B,PTPN1,PPM1F,IP6K2,NUDT4,PTPRN,ALPL,PLCD4,PI4KB,DOT1L,PP2D1,PGAM4,PPP4R1,NUDT15,DUSP14,TNS3,PPP1R16B,PPP2R5E,PTPN22,PPIP5K2,DUSP16

## Sheet: T3vsT2
Ingenuity Canonical Pathways in T3vsT2, ranked by -log(p-value), (FDR-adjusted p-value < 0.05)
Pathway Name	-log(p-value)	Ratio	z-score	Molecules
Calcium Signaling	3.15E00	1.56E-01	-0.426	CHRNA1,CAMK1,MYL6,CHRNA6,NFAT5,PPP3CB,MAPK3,CASQ1,TPM4,CHRNA3,ACTA1,MYH1,CALR,CALML5,GRIN3B,RYR2,MEF2A,TPM3,SLC8A2,PPP3CC,PNCK,MEF2B,RCAN1,MYH2,HTR3A,PRKAG2,CHRNE,SLC8A1,PRKAR1A
Role of CHK Proteins in Cell Cycle Checkpoint Control	2.81E00	2.18E-01	-0.302	PPP2CB,E2F1,PPP2R5C,E2F3,BRCA1,CHEK2,E2F2,PPP2R5A,CDC25A,CHEK1,ATM,RFC3
Antigen Presentation Pathway	2.57E00	2.43E-01	NaN	HLA-G,CALR,IFNG,HLA-DOA,PDIA3,PSMB8,HLA-F,TAP1,HLA-DRB5
Unfolded protein response	2.37E00	2.04E-01	NaN	CALR,HSPA14,DDIT3,INSIG1,MBTPS1,HSPH1,HSPA1A/HSPA1B,PPP1R15A,MAPK8,HSPA5,HSPA1L
Role of BRCA1 in DNA Damage Response	2.34E00	1.79E-01	-0.632	IFNG,BRCC3,E2F3,CHEK1,E2F1,FAAP24,MSH6,BRCA1,HLTF,E2F2,CHEK2,RFC3,ATM,PHF10
Protein Ubiquitination Pathway	2.29E00	1.31E-01	NaN	USP24,USP14,HSPA14,UBR2,USP20,DNAJC6,HSPA1A/HSPA1B,HSPB8,PSMB8,HSPA5,TCEB1,TAP1,HSPA1L,PAN2,USP42,UCHL5,BRCA1,IFNG,DNAJB12,DNAJC9,UBE4B,HSPH1,PSMD13,HSPB9,PSMC4,PSMD6,MDM2,SKP2,USP26,HSCB,USP22,BAP1,HSPB11,UBC
GDNF Family Ligand-Receptor Interactions	2.29E00	1.83E-01	1.941	SHC1,JUN,PSPN,GFRA4,GRB2,DOK6,MAPK3,PIK3R6,MAPK8,PIK3CD,IRS2,GFRA2,ATM
Endoplasmic Reticulum Stress Pathway	2.23E00	2.86E-01	NaN	CALR,CASP3,DDIT3,MBTPS1,MAPK8,HSPA5
p53 Signaling	2.18E00	1.63E-01	-0.775	PMAIP1,TP53INP1,MAPK8,PERP,MDM2,BIRC5,CHEK1,JUN,CCND2,E2F1,PIK3R6,GNL3,PIK3CD,BRCA1,CHEK2,ATM
TR/RXR Activation	2.07E00	1.63E-01	NaN	UCP2,GPS2,APOA5,NCOA6,MDM2,NCOA4,KLF9,HP,TBL1Y,PIK3R6,PIK3CD,ACACA,RXRB,PPARGC1A,ATM
Aryl Hydrocarbon Receptor Signaling	2.04E00	1.44E-01	NaN	TRIP11,CYP1A1,TYR,NQO1,MAPK8,MDM2,CHEK1,NCOA7,ALDH1L1,ALDH1A1,JUN,CCND2,MAPK3,E2F1,NRIP1,RXRB,CHEK2,ALDH5A1,AHR,MGST3,ATM
T Cell Receptor Signaling	2.01E00	1.57E-01	NaN	VAV2,CD247,CALML5,GRB2,MAPK8,PPP3CC,IKBKB,PTPRH,NFAT5,JUN,PPP3CB,CARD11,MAPK3,PIK3R6,PIK3CD,ATM
Glucocorticoid Receptor Signaling	1.99E00	1.25E-01	NaN	CD247,PRKAB1,HSPA14,HSPA1A/HSPA1B,GTF2H2,HSPA5,NR3C1,HSPA1L,IKBKB,SHC1,JUN,NFAT5,PPP3CB,MAPK3,MAP3K7,GTF2H5,SMAD4,ATM,POLR2I,TAF12,IFNG,GRB2,TAF5L,MAPK8,PPP3CC,MED14,TAF5,PIK3R6,PRKAG2,GTF2H1,PIK3CD,NRIP1,A2M,HLTF,PHF10
Signaling by Rho Family GTPases	1.9E00	1.27E-01	1.347	MYL6,ARHGEF7,GNA11,SLC9A1,CDH11,CLIP1,STMN1,PAK1,ITGA3,JUN,RHOG,MAPK3,CIT,BAIAP2,CDH13,ACTA1,ATM,SEPT4,ITGA2,MAPK8,VIM,SEPT1,WIPF1,ARPC1A,CDH20,PIK3R6,PIK3CD,PIP4K2A,SEPT12,GNAL
EIF2 Signaling	1.89E00	1.33E-01	0.535	RPS3A,RPL36A,RPS27,RPL7,RPS28,SHC1,UBA52,MAPK3,RPL19,PPP1CA,ATM,RPL4,GRB2,RPL3,RPS21,EIF2S2,RPS16,EIF4A3,PPP1R15A,EIF3I,PIK3R6,RPL37,PIK3CD,RPL6,RPSA
Role of JAK1 and JAK3 in γc Cytokine Signaling	1.86E00	1.75E-01	NaN	BLNK,SHC1,STAT6,SOCS3,IL15RA,GRB2,MAPK3,PIK3R6,IRS2,PIK3CD,ATM
Cell Cycle: G1/S Checkpoint Regulation	1.81E00	1.72E-01	-1.897	CCND2,BMI1,E2F1,SMAD4,MDM2,GNL3,E2F3,E2F2,SKP2,CDC25A,ATM
Regulation of IL-2 Expression in Activated and Anergic T Lymphocytes	1.81E00	1.6E-01	NaN	VAV2,CD247,IKBKB,CALML5,JUN,NFAT5,PPP3CB,CARD11,GRB2,MAPK3,MAPK8,SMAD4,PPP3CC
Actin Cytoskeleton Signaling	1.79E00	1.27E-01	0.784	MYL6,ARHGEF7,SLC9A1,F2,SHC1,PAK1,ITGA3,DIAPH1,DIAPH2,MAPK3,BAIAP2,ARHGAP24,ACTA1,MYH1,ATM,VAV2,GRB2,ACTN2,ITGA2,FGD1,GSN,MYH2,TIAM2,ARPC1A,PIK3R6,PIK3CD,FGF22,PIP4K2A
IGF-1 Signaling	1.79E00	1.52E-01	0	SOCS3,YWHAE,GRB2,MAPK8,SHC1,JUN,MAPK3,PRKAG2,PIK3R6,IGFBP3,PIK3CD,IRS2,CSNK2B,PRKAR1A,ATM
PAK Signaling	1.76E00	1.54E-01	1.604	CASP3,MYL6,GRB2,ARHGEF7,ITGA2,MAPK8,SHC1,ITGA3,PAK1,MAPK3,PIK3R6,PIK3CD,ATM,PDGFRB
Glutathione Redox Reactions I	1.76E00	2.31E-01	NaN	GSTZ1,GSR,CLIC2,GPX8,PRDX6,MGST3
Toll-like Receptor Signaling	1.74E00	1.62E-01	0.333	TLR4,IKBKB,LY96,JUN,TLR5,TAB2,TLR1,TLR7,MAPK8,MAP3K7,UBC,IRAK1
PDGF Signaling	1.73E00	1.57E-01	1.387	GRB2,SPHK2,MAPK8,ACP1,SHC1,JUN,INPP5F,MAPK3,PIK3R6,PIK3CD,CSNK2B,ATM,PDGFRB
IL-17A Signaling in Airway Cells	1.72E00	1.67E-01	1	IKBKB,IL19,TRAF3IP2,MAPK3,PIK3R6,MAPK8,MAP3K7,IL17RC,MUC5B,PIK3CD,ATM
PTEN Signaling	1.69E00	1.42E-01	-2.183	MAST2,CASP3,GRB2,FGFR1,ITGA2,FOXG1,DDR1,SHC1,IKBKB,ITGA3,NTRK2,INPP5F,BMPR1A,MAPK3,PIK3CD,CSNK2B,PDGFRB
Glutathione Redox Reactions II	1.63E00	3.75E-01	NaN	GSR,PDIA3,GLRX
Regulation of eIF4 and p70S6K Signaling	1.63E00	1.33E-01	1.508	RPS3A,RPS27,GRB2,ITGA2,RPS21,EIF2S2,PPP2R5A,RPS28,PPP2CB,SHC1,ITGA3,RPS16,MAPK3,EIF4A3,EIF3I,PIK3R6,PPP2R5C,PIK3CD,ATM,RPSA
PKCθ Signaling in T Lymphocytes	1.62E00	1.39E-01	-0.243	VAV2,CD247,HLA-DOA,GRB2,MAPK8,PPP3CC,IKBKB,NFAT5,JUN,PPP3CB,CARD11,MAPK3,PIK3R6,MAP3K7,PIK3CD,HLA-DRB5,ATM
IL-4 Signaling	1.62E00	1.56E-01	NaN	SHC1,STAT6,HLA-DOA,NFAT5,IRF4,INPP5F,GRB2,PIK3R6,PIK3CD,NR3C1,HLA-DRB5,ATM
CD28 Signaling in T Helper Cells	1.59E00	1.38E-01	0	CD247,HLA-DOA,CALML5,GRB2,MAPK8,PPP3CC,IKBKB,PAK1,NFAT5,JUN,ARPC1A,PPP3CB,CARD11,PIK3R6,PIK3CD,HLA-DRB5,ATM
Interferon Signaling	1.58E00	1.94E-01	1.633	IFNG,IFNB1,PSMB8,TAP1,BAK1,MED14,IFNA1/IFNA13
IL-3 Signaling	1.5E00	1.55E-01	NaN	SHC1,STAT6,PAK1,JUN,PPP3CB,GRB2,MAPK3,PIK3R6,PIK3CD,PPP3CC,ATM
RANK Signaling in Osteoclasts	1.5E00	1.46E-01	0.277	IKBKB,CALML5,JUN,PPP3CB,MAPK3,TAB2,MAP3K7,PIK3R6,MAPK8,PIK3CD,PPP3CC,GSN,ATM
Communication between Innate and Adaptive Immune Cells	1.46E00	1.44E-01	NaN	IFNG,CD40LG,IFNB1,HLA-G,TLR4,IGHG3,TLR5,TLR1,TLR7,TNFRSF13B,HLA-F,IFNA1/IFNA13,HLA-DRB5
IL-17 Signaling	1.46E00	1.53E-01	NaN	IL19,JUN,TRAF3IP2,MAPK3,PIK3R6,MAPK8,MAP3K7,IL17RC,MUC5B,PIK3CD,ATM
Role of NFAT in Cardiac Hypertrophy	1.46E00	1.24E-01	-0.626	CALML5,CAMK1,LIF,PDIA3,GRB2,MEF2A,MAPK8,HAND1,SLC8A2,PPP3CC,MEF2B,RCAN1,SHC1,PLCE1,PPP3CB,MAPK3,PIK3R6,PRKAG2,MAP3K7,PIK3CD,SLC8A1,ATM,PRKAR1A
phagosome formation	1.45E00	1.38E-01	NaN	TLR4,ITGA3,IGHG3,RHOG,PLCE1,TLR5,PDIA3,TLR1,ITGA2,PLA2R1,TLR7,PIK3R6,PIK3CD,FCGR3A/FCGR3B,ATM
IL-2 Signaling	1.44E00	1.64E-01	0.816	SHC1,JUN,GRB2,MAPK3,PIK3R6,MAPK8,PIK3CD,CSNK2B,ATM
RAR Activation	1.43E00	1.22E-01	NaN	NSD1,NR2F2,MAPK8,GTF2H2,DHRS7C,SNW1,CRABP1,JUN,ALDH1A1,PRKAG2,IGFBP3,GTF2H1,GTF2H5,SMAD4,PIK3CD,CSNK2B,RDH5,NRIP1,RXRB,HLTF,ADH4,PHF10,PPARGC1A,PRKAR1A
Retinoic acid Mediated Apoptosis Signaling	1.39E00	1.54E-01	0.707	IFNG,CASP3,ART1,IFNB1,DAP3,CYCS,PARP3,RXRB,CRABP1,IFNA1/IFNA13
Embryonic Stem Cell Differentiation into Cardiac Lineages	1.36E00	3E-01	NaN	ISL1,T,MESP1
Acetate Conversion to Acetyl-CoA	1.36E00	3E-01	NaN	ACSS2,ACSS1,ACSL1
Estrogen-mediated S-phase Entry	1.36E00	2.08E-01	-0.447	E2F1,E2F3,E2F2,SKP2,CDC25A
Ceramide Signaling	1.36E00	1.43E-01	1.508	PPP2CB,JUN,CNKSR1,MAPK3,SPHK2,PIK3R6,MAPK8,PPP2R5C,PIK3CD,CYCS,PPP2R5A,ATM
Role of PKR in Interferon Induction and Antiviral Response	1.35E00	1.75E-01	NaN	IKBKB,IFNG,CASP3,TAB2,IFNB1,MAP3K7,CYCS
CDK5 Signaling	1.35E00	1.36E-01	-1.155	ITGA2,MAPK8,PPP2R5A,PPP2CB,ITGA3,NTRK2,DRD1,MAPK3,LAMA1,PRKAG2,PPP2R5C,PPP1CA,GNAL,PRKAR1A
Cell Cycle: G2/M DNA Damage Checkpoint Regulation	1.33E00	1.63E-01	-0.707	CDC25B,YWHAE,MDM2,BRCA1,CHEK2,SKP2,CHEK1,ATM
Aldosterone Signaling in Epithelial Cells	1.32E00	1.23E-01	0.707	DNAJB12,HSPA14,DNAJC9,PDIA3,HSPH1,HSPA1A/HSPA1B,DNAJC6,HSPB8,HSPB9,HSPA5,SLC9A1,HSPA1L,PLCE1,HSCB,MAPK3,HSPB11,PIK3R6,PIK3CD,PIP4K2A,ATM
Myc Mediated Apoptosis Signaling	1.32E00	1.55E-01	NaN	SHC1,CASP3,YWHAE,GRB2,PIK3R6,MAPK8,PIK3CD,CYCS,ATM
HIF1α Signaling	1.32E00	1.35E-01	NaN	JUN,EGLN1,MMP23B,MAPK3,COPS5,MMP16,PIK3R6,MAPK8,PIK3CD,MDM2,MMP12,TCEB1,SLC2A4,ATM
Androgen Signaling	1.3E00	1.32E-01	-0.707	POLR2I,CALR,CALML5,GNA11,GTF2H2,NCOA4,SHC1,TGFB1I1,JUN,MAPK3,PRKAG2,GTF2H1,GTF2H5,GNAL,PRKAR1A
Mouse Embryonic Stem Cell Pluripotency	1.3E00	1.37E-01	-0.577	LIF,T,GRB2,ID3,LIFR,BMPR1A,MAPK3,PIK3R6,MAP3K7,SMAD4,PIK3CD,ATM,ZFP42
NF-κB Signaling	1.3E00	1.21E-01	0.218	CD40LG,FGFR1,TAB2,MAPK8,DDR1,IRAK1,TLR4,IKBKB,RIPK1,NTRK2,TLR5,BMPR1A,CARD11,TLR1,TLR7,PIK3R6,MAP3K7,PIK3CD,CSNK2B,ATM,PDGFRB
